# Supplementary material for: A host receptor enables type 1 pilus-mediated pathogenesis of Escherichia coli pyelonephritis
Source: PLoS Pathog. 2021 Jan 29;17(1):e1009314. doi: 10.1371/journal.ppat.1009314 (PMC7875428; doi:10.1371/journal.ppat.1009314)
Supplement: S1 Table — (XLSX) [file ppat.1009314.s011.xlsx]

## Sheet: Sheet1
	Gene Symbol	Average LFC	Average -log(p-values)	Number of perturbations	Perturbations	Individual LFCs	Ascending ranks	Individual ascending -log(p-values)	Descending ranks	Individual descending -log(p-values)
	Xbp1	3.8486	6.09312	4	GTCCATGGGAAGATGTTCTG;GGAGAAAACTCACGGCCTTG;GGACACGCTGGATCCTGACG;GACATTTGAAAAACATGACA	0.11;4.81;5.09;5.38	56505;79622;79628;79630	6.98E+00;3.60E+00;1.16E+00;6.54E-05	4;6;12;23129	1.10E+01;7.55E+00;3.70E+00;2.15E+00
	Il6	3.14109	5.25675	4	ACATGTTCTCTGGGAAATCG;CCTACTTCACAAGTCCGGAG;TATACCACTTCACAAGTCGG;ATGGTACTCCAGAAGACCAG	-0.46;3.27;4.72;5.03	25306;79612;79621;79626	6.40E+00;3.22E+00;3.94E-01;1.53E-04	8;13;22;54328	1.01E+01;6.83E+00;3.40E+00;6.64E-01
	Ifnb1	2.69577	5.50909	4	GACGAACATTCGGAAATGTC;GTTTCTGAAGACAGTACTAG;AAAGATCAACCTCACCTACA;GCTGCTTATAGTTGATGGAG	0.44;1.8;3.82;4.72	69957;79569;79616;79620	5.42E+00;3.07E+00;2.20E+00;2.84E-04	14;18;65;9677	8.68E+00;6.54E+00;3.66E+00;3.15E+00
	Tnf	1.74093	2.8131	4	CAGTAGACAGAAGAGCGTGG;AAGAAATCTTACCTACGACG;GTAGACAAGGTACAACCCAT;TGGGCCATAGAACTGATGAG	-1.27;0.08;2.6;5.56	2537;54912;79605;79632	2.85E+00;9.37E-01;5.61E-01;2.18E-05	2;29;24723;77097	6.11E+00;4.00E+00;1.08E+00;5.62E-02
	Dad1	1.00589	2.82747	4	TGGAGCTCAAGTACTCCTCC;GTTCGGCTACTGTCTCCTCG;TGTGGGCAGCTTCATCCTAG;CCTTTATATACTGCTGACCG	-0.77;0.97;1.21;2.62	12230;78144;79101;79606	2.69E+00;1.58E+00;4.29E-01;5.89E-04	28;533;1490;67404	4.59E+00;3.58E+00;2.85E+00;2.90E-01
	Cul4b	0.96809	2.58456	4	GACTTACCATTTGCCTACAG;AAAACTATACGGATGAGACA;CTCTTCAGTAGAGTTCGGGG;AATCGGCTTTACGCAGCCGA	-0.15;0.36;1.44;2.22	42099;67456;79421;79598	1.98E+00;9.97E-01;6.55E-01;7.64E-04	36;213;12178;37535	4.37E+00;2.74E+00;1.92E+00;1.31E+00
	Sars	0.864645	2.94507	4	TCCCACGACTTATTGTCATG;CACCTCAGAGCAGCCCATCG;GAAGGTTCCCAATCTCGCGG;AATATGCACTGCGTACCTTG	-0.02;1.01;1.22;1.24	49629;78422;79112;79160	2.87E+00;1.59E+00;8.75E-01;1.03E-02	474;522;1212;30005	4.86E+00;3.60E+00;1.70E+00;1.63E+00
	Dsg2	0.842438	2.72801	4	GAAGTGGAAAATAACGCACC;TCTGTGTGTCAGTCTCAATG;GTCTTCAACAGTGATAACGA;TCAAAGACGAATATGCCGAA	0.31;0.7;0.97;1.38	65635;75586;78181;79365	1.86E+00;1.75E+00;1.16E+00;5.86E-03	269;1453;4048;13999	3.30E+00;3.02E+00;2.72E+00;1.87E+00
	Atp6v0c	0.834803	2.67718	4	GCCCAGCACTCACCTGTAGA;TCGCAGCCATGTCAGTCATG;CTCACCGCTGAAGACCATGG;CGAAAAACGAAGAATATTCG	-0.6;0.75;1.41;1.78	18625;76194;79392;79567	1.99E+00;1.92E+00;3.76E-01;1.44E-03	67;242;3440;61009	4.26E+00;3.51E+00;2.47E+00;4.63E-01
	Olfr785	-1.50181	1.93355	1	TTGAGGACCAACATTAATGG	-1.5	928	1.93	78706	0.00509
	Pten	1.3267	1.72381	4	ACTATTCCAATGTTCAGTGG;CCTCCAATTCAGGACCCACG;GGTTTGATAAGTTCTAGCTG;TGTGCATATTTATTGCATCG	-0.38;0.31;0.32;5.06	29448;65483;65747;79627	8.92E-01;4.32E-01;4.06E-01;1.31E-04	7;13887;14151;50186	3.45E+00;1.73E+00;9.05E-01;8.02E-01
	Isg15	1.29266	1.68259	4	CAGCAGCACAGTGATGCTAG;TGGAAAGGGTAAGACCGTCC;GTCCGTGACTAACTCCATGA;GCATCCTGGTGAGGAACGAA	-0.56;0.32;0.41;5.0	20375;65944;69042;79625	9.15E-01;4.60E-01;3.75E-01;1.75E-04	9;10592;13690;59259	3.34E+00;1.77E+00;1.10E+00;5.13E-01
	Otud5	1.25783	1.90116	4	AGCTGCCGCAGCGCGAATCG;CCATAGCCTGCATTTCAATG;AATTATAGTGGATATTCCGG;CTCTTGGTGCGACAACTGCG	-0.59;-0.57;1.09;5.1	19144;20012;78761;79629	1.37E+00;6.73E-01;3.75E-01;8.73E-05	5;873;59622;60490	3.60E+00;3.15E+00;4.78E-01;3.75E-01
	Crkl	1.24144	1.44046	4	GACACGCGAGTTCTCGGACA;GGGCGCCGGTTCGATTAAGG;GGTCCCCGATCTTAAAGCGG;CTTACGTTGAAAAGCTTGTG	-0.42;-0.41;0.26;5.54	27103;27734;63454;79631	5.10E-01;4.08E-01;3.86E-01;4.36E-05	3;16180;51899;52531	3.82E+00;8.03E-01;7.23E-01;4.14E-01
	Usp22	1.19051	1.64275	4	TGCGTGGACTGATCAACCTG;TTGACCAGATCTTTACGGGT;TGGGGCTCTGCATCTCACAG;GCCATCGACCTGATGTACGG	-1.02;-0.03;0.85;4.96	5922;49258;77308;79623	9.71E-01;6.27E-01;4.76E-01;2.18E-04	11;2326;30376;73713	3.26E+00;2.32E+00;8.62E-01;1.34E-01
	Gsdmc3	1.14072	1.95246	5	GTACGGTGGATACAACATCG;ACTACTGCCTGAACTCTCAA;AGAGGCTTATGAAGTGTCCA;TGTCCAATCAACGGACCTGG;ATTTATAGAACAGAATTACA	0.05;0.09;0.39;0.49;4.69	53392;55564;68365;71355;79619	1.40E+00;8.97E-01;8.72E-01;4.75E-01;3.82E-04	15;8279;11269;24070;26242	3.03E+00;2.41E+00;1.68E+00;1.54E+00;1.11E+00
	Ifnar1	1.13437	1.41917	4	GTGCAGTGTATAAGCACCAC;TCTCCATGTACAAGCCTCAG;CTTCTAAACGTACTTCTGGG;ACAGTTGACATAAACAAGCA	-0.94;-0.11;-0.03;5.61	7744;44714;49321;79633	5.43E-01;4.42E-01;4.39E-01;-0.00E+00	1;30313;34906;71890	4.30E+00;7.23E-01;4.77E-01;1.78E-01
	Retreg1	1.06268	1.85146	4	GGACCTTCAACCTTTCAGAG;AGGTAGCTGAGTATGACCCC;AAACTCCCTACCTTTCAGTG;AACACGCCCAAGAATCATGA	-0.45;0.2;0.86;3.65	25389;60752;77338;79615	9.76E-01;7.07E-01;3.95E-01;3.93E-04	19;2296;18882;54245	3.02E+00;2.33E+00;1.39E+00;6.67E-01
	Dok1	1.01443	1.29961	4	CCAGTCACTCACCGGAAAGG;AGGGCCTGGAGGAATTCGCA;TGCAAGGCTCCTACATACTG;CCATACAAATCCCAATAGAG	-0.25;-0.19;-0.18;4.67	36732;39834;40671;79618	5.84E-01;5.40E-01;4.26E-01;3.27E-04	16;38962;39800;42902	3.10E+00;1.07E+00;6.02E-01;4.26E-01
	Cbfb	0.95063	1.17411	4	AACCCATACCATCCAATCTG;CGATCTCCGAGCGACCGTCG;GCCTTGCAGATTAAGTACAC;AAGTCGACATATTCCCGGCT	-1.13;-0.35;0.29;4.99	4250;30873;64642;79624	7.42E-01;4.71E-01;3.95E-01;1.96E-04	10;14992;48762;75384	3.30E+00;8.53E-01;4.49E-01;9.53E-02
	Etnk1	0.926544	1.48074	4	TGGAAGATGTAGTTCTGGTG;CATTGTGCGCATGAATAGCA;CTGTGCTATGAGTTTATCCA;ATAATCTACAACGAGAAACA	-0.26;-0.14;0.46;3.64	35885;42958;70493;79614	5.25E-01;4.97E-01;4.31E-01;4.15E-04	20;9141;36676;43749	3.00E+00;1.21E+00;1.04E+00;6.76E-01
	Traf2	0.889258	1.13137	4	AGTACAAACCTTGTTACTCA;CGGACCAGGCCTTTACATGC;CACAGGTTAAGGGAAACTTG;AGATAACGCTGCCCGCAGAG	-0.73;-0.27;0.12;4.43	13770;35380;57265;79617	4.37E-01;4.07E-01;3.79E-01;3.49E-04	17;22369;44255;65864	3.07E+00;6.11E-01;5.16E-01;3.30E-01
	Nlrp3	0.833566	1.84046	4	GCTGCGTGTAGCGACTGTTG;CTCTACCAGAATGGACCACG;GTTCTTTATCCACTGCCGAG;CCTCTCTGCTCATAACGACG	-0.24;-0.16;0.98;2.75	37157;41787;78219;79608	1.17E+00;5.48E-01;4.28E-01;5.45E-04	26;1415;37846;42477	2.88E+00;2.74E+00;1.09E+00;6.47E-01
	Psme2b	0.822275	1.48329	1	GGATGTCCAGAGGAGCCCGG	0.82	77017	0.0145	2617	1.48
	Ccpg1	0.783313	1.25253	4	AGCTCAGATGACCTTAACAT;TTATCTCTCACAGCGCAAGC;AGTAAACGCCACTTTAGTCG;GCAAACAACACATCGTCAGT	-0.6;-0.14;0.31;3.56	18719;43077;65398;79613	4.32E-01;4.02E-01;3.76E-01;4.36E-04	21;14236;36557;60915	2.98E+00;8.88E-01;6.79E-01;4.65E-01
	Nvl	0.775938	1.91769	4	CACGAGGGGGCACGACACCA;TTTATTGACAAAACTCCCGG;TTCTGATGATGATTCGAACA;GTTCTTAGATCTGAATAACG	-0.09;0.24;0.72;2.23	45716;62798;75775;79600	7.78E-01;7.77E-01;7.51E-01;7.20E-04	34;3859;16836;33919	2.77E+00;1.89E+00;1.53E+00;1.48E+00
	Dis3	0.77232	2.48886	4	AATTCGGATAGAAACCAGAC;GATATTACCACTAGTCTCCG;GGATACCAGCCTTCACGTGT;GCCAAAATACCTGTCAACGT	0.25;0.56;1.03;1.25	63034;73016;78471;79179	1.54E+00;1.46E+00;1.25E+00;9.93E-03	455;1163;6618;16600	2.91E+00;2.72E+00;2.68E+00;1.65E+00
	NO_CURRENT_300	0.769892	2.4363	4	TTTTGGCGACGCATCGCTGG;TTTTTAGACCTAATTCGCGC;TTTTAGTAGGTCAACGCTGT;TTTTCGTCGACTAAGTCAAG	0.0;0.74;0.95;1.39	50931;76038;78024;79375	1.95E+00;1.12E+00;9.22E-01;5.64E-03	259;1610;3596;28703	3.45E+00;2.63E+00;1.89E+00;1.77E+00
	Gtf2e1	0.72339	2.27612	4	TATACAAGTCCTCATACGAG;GGAGACAGAGGATGTAAACT;TTATGGCATTGAGCACGTGT;GAGAGAGAGCACTGTCCAAG	0.09;0.17;1.31;1.33	55554;59368;79281;79303	1.76E+00;1.11E+00;6.66E-01;7.21E-03	331;353;20266;24080	3.93E+00;2.08E+00;1.78E+00;1.31E+00
	Wdr82	0.721604	2.1788	4	TAGGGCCTCATGCATCTACA;AGTATGATAGGACCTGTGAG;TTACCTTATCAAAAGAACGA;ACTTTCCTGGACACAGCAAG	-0.78;0.5;1.16;2.0	12222;71548;78973;79585	1.49E+00;1.30E+00;4.29E-01;1.05E-03	49;661;8086;67412	3.39E+00;2.61E+00;2.42E+00;2.89E-01
	Glrx3	0.715585	2.43687	4	CCTTACCTTGAAGAACAGGA;AGATGTTCATTAGTACTAGG;ATCGGCTTCTTACCACAGCG;CAGATGAAGAAGTTCGACAG	-0.01;0.89;0.91;1.07	50447;77572;77757;78682	2.42E+00;1.06E+00;9.04E-01;2.09E-02	952;1877;2063;29187	4.17E+00;2.50E+00;1.74E+00;1.34E+00
	Med7	0.707541	2.45451	4	GCCTCCAATGCAGTACATCA;GACTTTGAGAGTCATGATGG;GAATGATAAGATCATCACAT;ACATCTTAATAAGAAGTCCT	0.34;0.72;0.8;0.97	66614;75738;76831;78180	1.89E+00;1.84E+00;8.98E-01;3.20E-02	1454;2803;3896;13020	3.35E+00;3.15E+00;2.16E+00;1.16E+00
	Rft1	0.704417	1.93817	4	GGTTCTTGCTGAGAGCATGT;AGGACCAAAATATACCCAGT;GGCAAAGCCAAAAACAGTCA;GAATAATCTTGGCTCCCTTG	-0.05;0.22;0.81;1.84	48070;61600;76869;79575	9.04E-01;8.23E-01;7.35E-01;1.27E-03	59;2765;18035;31564	2.53E+00;2.17E+00;1.61E+00;1.44E+00
	Pop5	0.69288	1.46785	4	CAGTAGCACGACTCCAGTGT;TGAAGAAGCACGGGTAACGG;GCACCCGGGCGATCGTGTCG;TTCTTCAACACATTACACGT	-0.18;-0.18;0.43;2.69	40485;40771;69712;79607	6.17E-01;4.76E-01;4.26E-01;5.67E-04	27;9922;38863;39149	2.87E+00;1.23E+00;1.15E+00;6.23E-01
	Fam129a	0.692302	1.96333	4	CAGACCTCAAAACCGCCATG;ATTGTAACTTACTCCAAACC;ACGGAGCTTAACCTTCTCGA;TCTTCCTAGGCCTATCAGAG	0.01;0.2;0.84;1.72	51190;61075;77213;79549	9.55E-01;9.31E-01;7.17E-01;1.83E-03	85;2421;18559;28444	2.37E+00;2.28E+00;1.79E+00;1.41E+00
	Slc38a11	0.68526	2.22089	4	ATCTCCGGACATGAACACGG;AATAAAAGCAGTATTCCCAA;TTATGGTGGCAAATGAACGC;TTCTTGGAATCGTAATGACA	-0.64;0.47;1.31;1.6	17058;70725;79282;79515	1.76E+00;1.23E+00;3.81E-01;2.58E-03	119;352;8909;62576	3.94E+00;2.30E+00;2.23E+00;4.19E-01
	Plekhj1	0.681904	2.20005	4	CAGCTTCACCAGTCGCCGCT;TCTGCAGCGCTCCAGCAACA;CTACCTCGGCCTCGTCCGGG;GCTTCGTCGAAGACCTCAGC	0.15;0.57;0.85;1.16	58669;73093;77266;78971	1.47E+00;1.27E+00;9.64E-01;1.45E-02	663;2368;6541;20965	2.69E+00;2.32E+00;2.30E+00;1.49E+00
	Rbm4	0.680839	2.23052	4	GCTCTTGGTTGGTACAAGTG;CAGAGCGGCTGCTATCGGTG;GCTCGGTCAAGTCTGCCACG;TTGTATTACAACAACACGTA	-0.26;0.61;1.16;1.21	35749;74108;78987;79089	1.60E+00;1.50E+00;5.22E-01;1.19E-02	545;647;5526;43885	3.41E+00;2.91E+00;1.57E+00;1.04E+00
	Krt80	0.675376	2.10535	4	GGAGCGAGCTGCCCGCTCAG;GATGAGAACAGTCTATGAGC;ATGGTGGCTGAGGTCGAAGG;CGCTGCCACATCGACCTGAG	0.01;0.56;0.81;1.32	51161;73027;76885;79299	1.46E+00;9.30E-01;9.06E-01;7.30E-03	335;2749;6607;28474	2.68E+00;2.18E+00;1.79E+00;1.78E+00
	Zfp574	0.666286	1.37398	4	GGGAAGACACGACTGCACAG;GTTGCCCACACTCAAGACAC;TCAAGAAGAAGTCTCATGTG;CTGAACTCTCCTCACATACG	-0.55;-0.2;0.56;2.86	20786;39180;73057;79610	5.93E-01;4.26E-01;3.75E-01;5.02E-04	24;6577;40454;58848	2.92E+00;1.46E+00;5.88E-01;5.25E-01
	Ube2ql1	0.662428	2.15547	4	CCGAGATGAAGCGGTCGCTG;CAGCAGAGCGCATCGCTGCG;CCTGCACAACCGGGACACCG;GGGCAAGAGTAAGCGCGCGG	-0.07;0.67;0.89;1.15	46841;75113;77647;78941	1.76E+00;1.03E+00;7.84E-01;1.52E-02	693;1987;4521;32793	3.16E+00;2.45E+00;1.54E+00;1.47E+00
	Col4a5	0.662295	2.1916	4	CTGGTCCCAAGGGTATATCA;GAAAAACTTACAAGTCCGGG;CCTGGAACATCAAACCCAGG;GCTGGGATAACTGGTCCGAA	0.08;0.62;0.92;1.03	55370;74114;77839;78489	1.60E+00;1.10E+00;1.07E+00;2.51E-02	1145;1795;5520;24264	2.91E+00;2.54E+00;2.06E+00;1.26E+00
	Tas2r115	0.650708	2.0687	4	GGGGAATGGATTCATAGCTC;TGAAGAGATAAAAGATGCTG;GCTATCAAGGATACACCAAA;ATTTCTAGTCATCAGTAATG	0.05;0.14;1.19;1.23	53669;57828;79053;79125	1.55E+00;1.03E+00;6.25E-01;1.11E-02	509;581;21806;25965	3.50E+00;1.95E+00;1.60E+00;1.22E+00
	Ccdc69	0.647664	2.28393	4	GACACAGACAGAACTCCTGG;TCTTAGTGATTGCATCCAAG;CCCGCAGACATCGAATGCAC;GGTTTCTATAGAGTCGGCTA	0.41;0.5;0.83;0.85	68956;71598;77130;77230	2.08E+00;1.31E+00;9.42E-01;5.32E-02	2404;2504;8036;10678	3.49E+00;2.43E+00;2.25E+00;9.58E-01
	Tmem108	0.644004	2.07375	4	AGGGTCTGTAGAGATTCCCT;GAAGAGAAGTAGCCCCCGAG;ACTCTCACACCCGTACCGGG;GGCTTTATCAGATCCAACCA	-0.58;0.5;1.13;1.53	19643;71564;78873;79477	1.43E+00;1.30E+00;3.75E-01;3.41E-03	157;761;8070;59991	3.27E+00;2.43E+00;2.11E+00;4.92E-01
	Cpe	0.642693	2.02211	4	TTTGGAAAATTGCGTCATCA;TCATCGTCATTCTTGCGACA;CGGCTTTCTCAAAGCCGTCG;CTTTCTGGTACTCGTTACAC	-0.17;0.01;1.32;1.41	41184;51229;79292;79398	1.77E+00;6.33E-01;5.00E-01;5.13E-03	236;342;28405;38449	3.96E+00;1.93E+00;1.26E+00;9.33E-01
	Pfn1	0.640731	1.90302	4	GTCAATGGGCTGACACTTGG;TCGACAGCCTTATGGCGGAC;CAGTACCGTAATGCTAACGA;CGAGTCCTTGTAGCCTACGA	-0.57;0.34;0.99;1.81	19889;66523;78306;79570	1.20E+00;9.45E-01;3.75E-01;1.37E-03	64;1328;13111;59746	2.79E+00;2.49E+00;1.83E+00;4.99E-01
	Iars	0.638579	1.88105	4	GGTATGTCCGAATGAACAGG;AAGCATCCACAGGACAAACA;CGTTGACAGAAGATTCGGGT;GGAATTGATCAGATATAACC	-0.28;-0.0;1.1;1.73	34985;50737;78805;79556	1.39E+00;5.09E-01;4.94E-01;1.68E-03	78;829;28897;44652	3.20E+00;2.41E+00;1.01E+00;9.14E-01
	Rpl36	0.634228	2.10182	4	GAGACACAGCCGGCGACGCG;CAAACACACCAAGTTCGTGC;GCGGCTTCGCACCCTACGAG;GACATGATCCGGGAGGTGTG	-0.4;-0.38;1.57;1.74	28457;29518;79502;79558	2.18E+00;4.86E-01;4.21E-01;1.64E-03	76;132;50123;51179	4.79E+00;2.42E+00;7.68E-01;4.32E-01
	Gm438	0.63179	1.95393	4	AGTGAGAAAGTGTTGTATGA;GATAAGGAAGAACTCTAATG;GCTCCTGTACCTGATAACTC;GCGTCTTCCAAATACAGGCG	0.01;0.21;1.01;1.3	51201;61491;78409;79256	1.23E+00;9.32E-01;7.31E-01;8.24E-03	378;1225;18143;28435	2.86E+00;1.79E+00;1.73E+00;1.44E+00
	Rps24	0.628538	1.89488	4	TTTCCTCTGAAGCAGACGGT;ATAGATCATGCCAAAGCCAG;TCATTGATGTCCTTCATCCT;TTTGGATTCAGAACCCACTT	-0.08;0.0;1.05;1.54	46440;51074;78597;79485	1.30E+00;7.72E-01;4.98E-01;3.23E-03	149;1037;28560;33195	3.00E+00;2.13E+00;1.52E+00;9.27E-01
	Dlx5	0.622317	2.1637	4	AGGAGAGCAGTAGCCGTGCG;TCTAGGACTGACGCAAACAC;CTGCGGAGCCGTTCACGCCG;GCCAAGGCTTATGCCGACTA	0.01;0.77;0.81;0.89	51640;76486;76920;77611	2.06E+00;9.48E-01;9.11E-01;4.47E-02	2023;2714;3148;27994	3.63E+00;2.19E+00;1.82E+00;1.03E+00
	Gm13889	0.617847	2.10395	4	ATGAGTTCCCGCAGCCGGTG;GACCTTCGACGAGATCCAGG;TCGGTCAGGCACACGAAGTG;GTCTTGAAGCGGGACTGGCG	0.28;0.44;0.85;0.9	64439;69909;77288;77650	1.65E+00;1.16E+00;9.68E-01;4.38E-02	1984;2346;9725;15195	2.88E+00;2.31E+00;2.19E+00;1.03E+00
	Reep4	0.613023	2.06292	4	TCAGAGGTACCTTCTCATGG;GCTCTCACCTTACACCAAGG;GGGTGTCAGGGATAGAGCGC;GCCTTGTAGGAAGCATACGC	-0.26;0.63;1.03;1.05	35878;74412;78520;78574	1.65E+00;1.27E+00;5.24E-01;2.33E-02	1060;1114;5222;43756	2.98E+00;2.94E+00;1.29E+00;1.04E+00
	Spats2	0.612025	1.53674	4	TAAGTCGGCCCCCATTCAAG;CTGCTCCTCTGACATGCGAA;CAGTTTAATGGATCGAGAAG;TCTCTTCTTTAACGACAACT	-0.22;0.03;0.52;2.12	38048;52387;72081;79593	5.65E-01;5.51E-01;5.17E-01;8.73E-04	41;7553;27249;41586	2.69E+00;1.35E+00;1.13E+00;9.77E-01
	Olfr193	0.610533	2.08321	4	GACTTGTTCATCTGCCCCAG;GCATAACATCACAATAAAAG;ATTTGGAATCAGTGCAACCA;ATGAATGAATCCACCTACAA	0.14;0.67;0.69;0.94	58045;75045;75400;77969	1.75E+00;1.24E+00;7.44E-01;3.67E-02	1665;4234;4589;21589	3.14E+00;2.27E+00;1.82E+00;1.11E+00
	Mphosph9	0.608024	1.91108	4	CCGACTCATAATAAGCACGA;GAGCTTGTAAGCATTCTCGA;AGCCAAAGGAGCATGTCGCA;TTGTTCTCAGCGAATACAGG	0.04;0.08;1.04;1.28	52866;55010;78562;79218	1.29E+00;9.96E-01;5.63E-01;9.08E-03	416;1072;24624;26768	2.98E+00;1.89E+00;1.69E+00;1.09E+00
	Sema6d	0.604599	1.57134	4	TCTTCCGAACGAACATGTCA;ACGATCCGTAGCGCTCACAG;GCAGGCTGTGTATTCCCGCG;GCTTAATCTAGAAGCTGACG	-0.11;-0.05;0.55;2.04	44605;47753;72674;79587	7.20E-01;5.76E-01;4.61E-01;1.00E-03	47;6960;31881;35030	2.63E+00;1.43E+00;1.42E+00;8.13E-01
	Micu3	0.604196	1.97852	4	TGGTTCACTGTACCTCTGCG;CACTGACGGAAATGAGATGG;TCTCTCGAGATGTAGCATAG;GGGCGAGCTGAGCATCGCGG	0.16;0.24;1.0;1.02	58978;62771;78331;78427	1.29E+00;1.21E+00;7.77E-01;2.65E-02	1207;1303;16863;20656	2.81E+00;2.34E+00;1.52E+00;1.24E+00
	Ufd1	0.600952	2.24336	4	GGGAGCATCAAAATCCACCT;AGTACTTACTGAGTTGATCG;GGATATTACCAACCCTAAAG;CAGCTCAACTCACCCAGTGG	-0.76;0.82;1.1;1.24	12835;77038;78781;79150	2.22E+00;1.38E+00;4.20E-01;1.06E-02	483;853;2596;66799	3.87E+00;3.17E+00;1.62E+00;3.05E-01
	Togaram1	0.598019	1.87479	4	AAACCAACGAGACTAGCATG;GAGAAGATAACCCTGCCCTA;GGAAGAAGGTGATCGCACCA;TCAGAGTCAGTTCCTACATG	0.12;0.43;0.57;1.28	57048;69581;73084;79222	1.18E+00;1.14E+00;5.95E-01;8.99E-03	412;6550;10053;22586	2.19E+00;2.15E+00;1.69E+00;1.47E+00
	Lamc1	0.597845	1.75946	4	ATGTAGCGATGGGTACTATG;CAGTCGCGGCCAGACACATG;ACGTACTCAAAGGCTAACCG;TTGACCTCTATCAAGATCCG	-0.2;0.31;0.76;1.52	39216;65671;76298;79473	9.02E-01;8.32E-01;5.89E-01;3.49E-03	161;3336;13963;40418	2.09E+00;2.01E+00;1.75E+00;1.18E+00
	NO_CURRENT_180	0.597427	1.78358	4	GCGAGGTATTCGGCTCCGCG;GCGAGTTATTTCGCTATAGG;GCGAGCGCTATCCCGGTGGA;GCGATCGCCGGTATAGCTTT	-0.23;0.43;0.69;1.5	37611;69659;75407;79452	1.14E+00;7.44E-01;5.57E-01;3.95E-03	182;4227;9975;42027	2.16E+00;2.04E+00;1.82E+00;1.11E+00
	Cpt2	0.594501	2.0052	4	TCGGGAAGTCATCTAAGCAG;TTAAATACATATCAAACCAG;TCACTGGTCAAATAAGCCAG;AAATATTGGGACATATCCAG	-0.21;0.75;0.75;1.09	38647;76161;76259;78742	1.98E+00;8.27E-01;5.77E-01;1.95E-02	892;3375;3474;40987	3.50E+00;2.01E+00;1.36E+00;1.15E+00
	Nupl1	0.594286	1.69818	4	TACTAAAGTCTATACCACCA;GAGAGTAAGACCACTAGCTG;TGGCAGGCTTAGATCCAAAG;CCTAGACGCGACGGTCCCGA	-0.03;0.17;0.58;1.66	49152;59337;73458;79535	8.59E-01;6.65E-01;6.14E-01;2.14E-03	99;6176;20297;30483	2.31E+00;1.67E+00;1.51E+00;1.31E+00
	Ccdc40	0.59258	1.88247	4	CAGAAAGGTCAGACCCCAAG;GACCTGCCAGACCGCCAATG;AGAAGTTGAATCCATCGGAG;GGGCATGAAGCACCGTAACG	0.03;0.37;0.85;1.12	52373;67741;77262;78858	1.01E+00;9.77E-01;9.63E-01;1.70E-02	776;2372;11893;27264	2.30E+00;1.95E+00;1.86E+00;1.42E+00
	NO_CURRENT_143	0.591549	1.89533	4	CTGATCGGTGCATATCTCGG;CTCTCTGCGAGTCGATGATT;CTGAGGCGTCAGAACCCGCG;CTCTAATAAACCGCACAAGC	-0.41;0.06;1.28;1.43	27827;54227;79232;79414	1.70E+00;5.48E-01;4.15E-01;4.78E-03	220;402;25407;51807	3.82E+00;1.96E+00;1.05E+00;7.47E-01
	Olfr1048	0.59149	1.6519	4	AACACAGTAAAAGTAACATA;GTGAAGGCGAGAGTCCAACT;TTCTGACAAGAATTACACAC;AGACGCTGTCATGTTCTGGT	-0.33;0.07;0.8;1.83	31977;54593;76759;79572	8.88E-01;5.55E-01;4.63E-01;1.33E-03	62;2875;25041;47657	2.51E+00;2.14E+00;1.07E+00;8.92E-01
	Dnajc25	0.590077	1.81577	4	CCCAAAAGTGGACGTTAGGG;CGGCACGCGCGACTGCTACG;CCAGGATGAAGAAACACGGA;AAAGTAAAATAGACATAAAG	0.16;0.24;0.6;1.36	59155;62737;73812;79331	1.30E+00;7.76E-01;6.33E-01;6.60E-03	303;5822;16897;20479	2.36E+00;1.82E+00;1.56E+00;1.52E+00
	Slc23a2	0.589128	1.96236	4	CTGGCATCCCCGAATCCAAG;ACAGGCGTAGTAGTCACCGA;GTGTTTCAGTGGCACGATCG;GCGTGCATAGTAGCCATAGT	0.05;0.53;0.83;0.94	53736;72362;77054;77991	1.38E+00;1.03E+00;9.30E-01;3.62E-02	1643;2580;7272;25898	2.56E+00;2.23E+00;1.95E+00;1.11E+00
	Oxct2b	0.588051	2.07802	4	GGGTCGACCGTCATGCTCGG;TTCTACCACCGAGATGTCCG;ACTTCGGCCCCTTGATCACG;GCCCACAGGCTACGGAACGC	0.29;0.54;0.73;0.79	64717;72623;75892;76685	1.67E+00;1.41E+00;7.89E-01;6.55E-02	2949;3742;7011;14917	2.91E+00;2.60E+00;1.92E+00;8.79E-01
	Ntn4	0.586474	2.03778	4	CTCCGGGCAGACACAATGTG;GCTTACACATACACCTCCCG;CTTCGACGTCAACGTGTGGG;GAAGGATCGCCGATCCAACC	0.21;0.62;0.64;0.88	61203;74255;74518;77500	1.62E+00;1.42E+00;6.77E-01;4.72E-02	2134;5116;5379;18431	2.94E+00;2.54E+00;1.66E+00;1.01E+00
	Agr3	0.586182	1.97109	4	TGGGTGCAAACTTACGAAGA;AGGTGACAAGTTCTTGTCCG;CCTCCTCAGACACTCTCAAG;GATGGTTATTCACCACCTGG	0.3;0.33;0.73;0.98	65186;66453;75907;78234	1.71E+00;9.41E-01;7.90E-01;3.08E-02	1400;3727;13181;14448	2.97E+00;1.92E+00;1.82E+00;1.18E+00
	Hsd17b14	0.584787	2.08558	4	CCAGGTGACCAAATCGAGAG;GGGGACATACACCTTGATCA;TTTCCTGTGTCACGTCACCG;GTCCCAGGCCCTTACCTACG	0.38;0.5;0.63;0.84	68076;71477;74313;77138	1.98E+00;1.29E+00;6.63E-01;5.53E-02	2496;5321;8157;11557	3.35E+00;2.41E+00;1.63E+00;9.43E-01
	Brf1	0.584392	1.572	4	CTTCTACCGAGAGCTCCTCG;AAGTATGTGAGTCCACACTA;AAAAGGGATTGGATGCACAC;TCAACGCACCAGCTATAGGT	-0.57;-0.3;0.91;2.29	20033;33897;77759;79602	1.06E+00;4.45E-01;3.75E-01;6.76E-04	32;1875;45744;59599	2.79E+00;2.50E+00;5.03E-01;4.91E-01
	Ago3	0.581167	1.72686	4	CTCGCATGTCCCATACTCCG;CATAGCGGAAGTGAAACGTG;TTCTCGTTACATTACAAACA;TTTGTAGATATACGCCTGTG	-0.17;0.1;0.9;1.5	40890;55909;77700;79457	1.04E+00;6.26E-01;5.81E-01;3.84E-03	177;1934;23725;38744	2.47E+00;2.05E+00;1.25E+00;1.13E+00
	Tardbp	0.579264	1.67167	4	TATGAGAGGAGTCCGACTGG;TATGTTGTCAACTATCCCAA;GTTTGTTGGACGTTGTACAG;TTGTGACATTACTTTCACTT	-0.35;0.21;0.77;1.68	31139;61526;76449;79541	8.49E-01;7.32E-01;4.52E-01;2.01E-03	93;3185;18108;48496	2.33E+00;2.05E+00;1.44E+00;8.62E-01
	Atp4a	0.578019	1.92479	4	AGGCACATAGGCTACCACAA;GCAAACGTTCGATCAGTCGT;CTCTGAGATGATACCCACGC;GCTGTCCATTCATACCCTGG	0.03;0.54;0.8;0.95	52499;72448;76765;78010	1.39E+00;9.82E-01;8.89E-01;3.58E-02	1624;2869;7186;27135	2.57E+00;2.14E+00;1.87E+00;1.12E+00
	Wnt10b	0.577198	1.70365	4	AGAAGGAGAAAGCACTCTCA;TGGTAACGGAAAACCTGAAG;TGTAACCACGACATGGACTT;GCGCCGACGCCGTCACGTCG	0.06;0.21;0.46;1.57	54388;61480;70377;79503	1.06E+00;7.31E-01;4.94E-01;2.84E-03	131;9257;18154;25248	2.18E+00;2.00E+00;1.44E+00;1.20E+00
	Ube2e1	0.571488	1.73625	4	TAGACCCTCCGCCAAACTGC;CTTTCAAGCCTCCAAAGGTA;CCTTCATACACAGACCCTGG;AGTGGGATACCTCTTAGCGC	0.14;0.16;0.54;1.45	58063;59051;72463;79429	1.24E+00;6.57E-01;5.66E-01;4.46E-03	205;7171;20584;21571	2.27E+00;1.99E+00;1.39E+00;1.29E+00
	Cd248	0.570547	1.90282	4	CTATAGGCCCAACTTCCCAC;ACTCATCCGTGTCCACGCAG;GCTTCCGTCTAGCAGCAGAT;GGGGCAACCTGGCCACACCG	0.19;0.4;0.75;0.95	60297;68650;76187;78033	1.36E+00;1.07E+00;8.19E-01;3.53E-02	1601;3447;10984;19336	2.46E+00;2.04E+00;1.99E+00;1.12E+00
	Rasa3	0.568245	1.84946	4	CAACAACCCCCAGTTTGACG;TTCAGTAACAGGTCACGCAG;CCTGGAGCTGAGACTAAGTG;TTCCTCGGAAGATGGTATTG	0.07;0.24;0.95;1.01	54720;62755;78021;78405	1.12E+00;1.07E+00;7.76E-01;2.70E-02	1229;1613;16879;24914	2.63E+00;2.02E+00;1.52E+00;1.23E+00
	Aasdhppt	0.566651	1.87782	4	GCAGACGGATATGATCCCAA;AAAGGAATTGTACCCAGTGC;GATGCGGTCTATCCAGCCGG;CTTTAACATCTCTCACCAAG	-0.53;0.22;1.25;1.32	21982;61910;79182;79288	1.65E+00;7.46E-01;3.78E-01;7.54E-03	346;452;17724;57652	3.72E+00;1.77E+00;1.46E+00;5.61E-01
	Kpna3	0.562714	1.76275	4	TGTTTGTGAACAAGCGGTGT;GACTACAGGATTATCACTTG;CTTCCTTCGGAACGTCACAT;GCTGTCATACTTGACAGACG	0.07;0.28;0.7;1.2	54687;64315;75454;79084	1.07E+00;8.39E-01;7.48E-01;1.20E-02	550;4180;15319;24947	2.02E+00;1.83E+00;1.64E+00;1.57E+00
	Rab11a	0.562047	1.74142	4	GAGTGATTTACGTCATCTCA;TGTTGCAAACTCTACTCCAA;AGATACTATCGTGGAGCAGT;CCACGGCCTCACCTTTAAAG	0.12;0.22;0.6;1.3	57303;61844;73749;79271	1.20E+00;7.43E-01;6.29E-01;7.92E-03	363;5885;17790;22331	2.21E+00;1.75E+00;1.55E+00;1.46E+00
	Rbp7	0.561506	1.82639	4	GAAAGTGATTGAGCAAAATG;ACAACCCTAAGTCCTACCCA;CCTGGATAACAGAAAATGCA;GAGTTTGAGGAGGATAACAA	-0.11;0.46;0.86;1.04	44658;70571;77317;78530	1.21E+00;9.73E-01;7.21E-01;2.42E-02	1104;2317;9063;34976	2.32E+00;2.28E+00;1.43E+00;1.27E+00
	Eif3e	0.560012	2.00976	4	AATGCTTTAAGTTCGCTCTG;ATGATGTAACTTACTGTGGT;TCATAACCAACAAAGATGTG;CTACCTGGCAGACAAACATG	0.2;0.63;0.66;0.75	60983;74423;74860;76169	1.65E+00;1.41E+00;7.01E-01;7.73E-02	3465;4774;5211;18651	2.98E+00;2.52E+00;1.72E+00;8.17E-01
	Ercc3	0.558344	1.87207	4	GCACAATAGTCAGAACCCGC;TGTCGCTTGAGGAACGCCGA;GTCTTTGGGTATGTCAGACG;ACATGAGTAGGCCGGCACAC	-0.73;0.54;0.91;1.52	13784;72506;77758;79466	1.40E+00;1.06E+00;4.07E-01;3.65E-03	168;1876;7128;65850	2.58E+00;2.50E+00;2.08E+00;3.30E-01
	Fibp	0.557337	1.83628	4	CTGGTGAGCACCTCTCGATG;CTTTAAACGAGTCTTCAAGG;AAAGGTGCGGTAGTGGTCCA;ACCTGGCTAACCGGTCAGAG	0.23;0.24;0.73;1.03	62275;62571;75908;78507	1.49E+00;7.90E-01;7.69E-01;2.47E-02	1127;3726;17063;17359	2.65E+00;1.92E+00;1.51E+00;1.27E+00
	Fbn2	0.556985	2.01564	4	AAGGTGTGACTTGCGAAGGT;GAGTGTATGATAATGAATGG;GTTGAGGTTACGAAGCCACG;CAGACTTGGTCACCGCACCC	0.31;0.56;0.59;0.76	65596;72974;73630;76398	1.74E+00;1.45E+00;6.23E-01;7.20E-02	3236;6004;6660;14038	3.02E+00;2.67E+00;1.54E+00;8.43E-01
	Phf23	0.554539	1.6444	4	TTACATCCCCCCTAGCAAAG;GATAGTTCGAAGGTCCGACG;AAGTTGAAAAAGGCAGATCG;AAGAATAGAAAGTTGGGACC	-0.1;-0.09;0.8;1.61	44982;45830;76793;79516	8.93E-01;7.30E-01;4.46E-01;2.55E-03	118;2841;33804;34652	2.23E+00;2.15E+00;1.45E+00;7.54E-01
	Rbmxl2	0.553145	1.86464	4	ACACGGGGGATTTCGACCTG;ACCAAGCCGGTGTTCGAGAG;CGGCTCGAATAGCTCTCCCG;GCGGCCATACTTGCCGAAAG	0.07;0.55;0.66;0.93	54782;72701;74915;77897	1.42E+00;1.08E+00;7.05E-01;3.83E-02	1737;4719;6933;24852	2.62E+00;2.02E+00;1.73E+00;1.09E+00
	Esx1	0.552714	1.78327	4	GGTCCGGGTACTGGACGCGC;CTGCATCAGAGGACGCATCA;CTTTGTTGGAGCAGTGAAGG;GCAAACTACCAGGAACCCGA	-0.02;0.33;0.87;1.03	49391;66426;77450;78502	9.96E-01;9.40E-01;8.67E-01;2.48E-02	1132;2184;13208;30244	2.37E+00;1.82E+00;1.68E+00;1.26E+00
	Irf2bp1	0.551764	1.77432	4	CATGGCGCCGTTCATACTCG;AGGCCCGGACCGCTATGACA;TTCTGGCAATGTTTACGCGG;GTTCGATTCAAGAAGGACCA	-0.16;0.34;0.95;1.08	41463;66654;78018;78726	1.12E+00;9.52E-01;6.39E-01;1.99E-02	908;1616;12980;38171	2.63E+00;1.84E+00;1.36E+00;1.28E+00
	Pla2g2f	0.549542	1.81413	4	GGTCATAGTGGTCCACGTAG;TCCCTCTAAAACCTCCAGGT;GCTTCTCATAGCAACAGTCG;CCTTCTTGCAGTGGTAACCA	0.09;0.52;0.53;1.06	55622;71927;72271;78632	1.34E+00;1.12E+00;5.58E-01;2.20E-02	1002;7363;7707;24012	2.48E+00;2.08E+00;1.37E+00;1.31E+00
	Trrap	0.548471	1.95834	4	GGTTAAGAATAATTCCCCGA;ACGTCGTGTAAAGCACCTGG;CCACATATCTGGCCGTAGAG;ACCAAGGGATCCATCAACAT	0.2;0.56;0.71;0.73	60793;72922;75709;75905	1.45E+00;1.39E+00;7.71E-01;8.33E-02	3729;3925;6712;18841	2.66E+00;2.50E+00;1.88E+00;7.90E-01
	Sult6b1	0.546943	2.01259	4	CTAGCATCCTACCCGAAGTG;TCGAAACCCTAAGGATACAG;GACGCCGAGAAATATCAGGT;AGGCAATTCATAAAGGGACA	0.39;0.5;0.53;0.77	68434;71479;72371;76404	2.02E+00;1.30E+00;5.63E-01;7.19E-02	3230;7263;8155;11200	3.41E+00;2.41E+00;1.38E+00;8.44E-01
	Nsmce2	0.545678	1.89791	4	ACCCGTTACATATCCTTCAG;ACTGCACAGCCTTAACATAA;AGAGAGAATGATCTGACAGA;ACTTACTTTGAGTCTCCACA	-0.12;0.65;0.81;0.84	44334;74718;76877;77181	1.70E+00;9.05E-01;7.12E-01;5.43E-02	2453;2757;4916;35299	3.05E+00;2.17E+00;1.41E+00;9.50E-01
	B3gnt9	0.545512	1.7372	4	CAGATGTGTTCGTGCACGTG;GCTCCCTAACACCGCCCGCG;GGCTCCCCAAGTCTGGCGAA;CGGCGGGTATCTGCGCGCCA	-0.64;0.39;0.85;1.58	17109;68398;77257;79512	1.06E+00;9.63E-01;3.81E-01;2.64E-03	122;2377;11236;62525	2.30E+00;2.21E+00;2.02E+00;4.20E-01
	Dolk	0.544514	1.85448	4	CCAGCAAAGACCAATAGGCA;CAGTGTAGGCGAGGTGATCG;AAAGTATTTCCACTTCATTG;GGACCGATACTCCTGGTGCG	0.32;0.35;0.42;1.08	65931;67054;69467;78725	1.77E+00;9.74E-01;4.70E-01;1.99E-02	909;10167;12580;13703	3.06E+00;1.88E+00;1.36E+00;1.13E+00
	Hist1h1b	0.54382	1.74108	4	GCCCAAGGCTAAGAAGACCG;TAAAAAGCCTAAGAAGACTG;GTTTCTGCCTCTAAGGAGCG;GACAACGAAAAAAGCTGGCG	-0.43;0.22;1.06;1.34	26466;61687;78611;79312	1.31E+00;7.38E-01;4.03E-01;7.02E-03	322;1023;17947;53168	3.02E+00;1.80E+00;1.45E+00;7.02E-01
	Naa25	0.543782	1.78259	4	CAAAGCTCTCGACATGTCCG;ATCGGGTCAGAAGATAGCTA;CTCTCGGTAGAGAATCGTCA;TTGCACAAGTACGCACTGAG	0.12;0.29;0.78;0.98	56939;64854;76606;78223	1.18E+00;8.68E-01;8.63E-01;3.10E-02	1411;3028;14780;22696	2.18E+00;2.10E+00;1.68E+00;1.17E+00
	Adar	0.543522	1.65976	4	TGTATCCAGGAATTCCCTAG;ACTCCAACAAGCCGCCTACG;AGAGGTAACCCCAGTAACAG;TTCTTGTAGGGTGAACACCG	-0.18;-0.06;0.93;1.48	40156;47637;77922;79449	1.09E+00;6.10E-01;4.60E-01;4.02E-03	185;1712;31997;39478	2.58E+00;2.03E+00;1.22E+00;8.09E-01
	Fam19a5	0.541095	1.67228	4	TGCCGGGCGATCGTCCTCCG;TGTCTTGATAATTCGAGCTG;GTGAGATTGTGACCCTAGAC;GCGCGTGAATCACCAGGACG	-0.28;0.42;0.66;1.37	34625;69312;74911;79349	1.12E+00;7.05E-01;5.03E-01;6.21E-03	285;4723;10322;45009	2.12E+00;1.85E+00;1.73E+00;9.91E-01
	Epb42	0.53986	1.87705	4	GAAGTTCAGGGTGATAGTGA;GCACTTCCAGACCACACACG;GCCTTGTTGTACAAACGTCG;GGTGGATGAGTACTACAATG	0.21;0.42;0.74;0.79	61213;69438;76013;76716	1.42E+00;1.13E+00;8.01E-01;6.48E-02	2918;3621;10196;18421	2.54E+00;2.14E+00;1.95E+00;8.83E-01
	Prdx6	0.539278	1.53836	4	TTACAATGGTGAAACACCCA;CATGCCTGTGACGGCCCGTG;CTGGGGTAAAGTCCCGTGGG;CATCATTGATGATAAGGGCA	-0.18;0.22;0.39;1.73	40689;61621;68340;79557	7.36E-01;6.22E-01;4.45E-01;1.66E-03	77;11294;18013;38945	2.41E+00;1.45E+00;1.24E+00;1.05E+00
	Agpat4	0.538555	1.85338	4	CGGGAAGGAAAACGCCATCG;AGAGTCTGGCATTGATCTTG;GCTACGTGTTCATCGCCTCG;GTGTACAGTCATATACAGCT	0.16;0.52;0.61;0.87	58879;72030;73926;77472	1.35E+00;1.28E+00;6.39E-01;4.78E-02	2162;5708;7604;20755	2.50E+00;2.34E+00;1.58E+00;1.00E+00
	Hif3a	0.536487	1.83301	4	AGTTCACATACTGCGACGAG;ATGTTGGTCACGTACAAGTG;GTCATGGTACTCACCGCCGA;GCGCACGCTCAACCTCAAAG	0.2;0.49;0.51;0.95	60716;71294;71889;78006	1.39E+00;1.28E+00;5.43E-01;3.59E-02	1628;7745;8340;18918	2.50E+00;2.39E+00;1.33E+00;1.11E+00
	Abracl	0.535843	1.68578	4	GATGAATTTCCTCCACCAGG;GTGGAGGAAATTCATCGCCT;AATCTCTTTGAAGCGTTGGT;TTTCTCCAATTAGATGCTGA	0.09;0.29;0.54;1.23	55694;64513;72431;79135	1.12E+00;8.48E-01;5.65E-01;1.09E-02	498;7204;15121;23941	2.09E+00;1.65E+00;1.61E+00;1.39E+00
	Ccdc102a	0.535421	1.87875	4	GGAGCCGGTGCGCGACATCG;CTGCCACCCACGCCGCCTAG;AGATGGAGAAAACAATGCGC;TCTGGGACTCATCTAGCCGT	0.2;0.48;0.69;0.77	60792;70906;75438;76511	1.39E+00;1.24E+00;7.47E-01;6.95E-02	3123;4196;8728;18842	2.50E+00;2.33E+00;1.83E+00;8.57E-01
	Efcab12	0.53471	2.13491	4	GAAGCATTAGATGGGTGGGG;TCTGGATACTAGCGACACCC;TCTTGATCTTTCGACTACGA;GGCTTGACGATCACAGACGC	-0.77;0.91;0.96;1.04	12397;77788;78066;78549	2.51E+00;1.13E+00;4.26E-01;2.38E-02	1085;1568;1846;67237	4.31E+00;2.65E+00;1.28E+00;2.94E-01
	Olfr101	0.534424	1.75981	4	ATGATCACAGAATAGTGGAG;TGTCATTACAGAGTGAAGCA;AAATAGCTTTGCTTGTGGAG;GCATGGTCTCAGTGCTACCC	-0.11;0.54;0.66;1.04	44616;72546;74928;78571	1.40E+00;7.20E-01;7.06E-01;2.33E-02	1063;4706;7088;35018	2.59E+00;1.73E+00;1.43E+00;1.29E+00
	Olfr339	0.533525	1.77014	4	GATGACCAGCTCATTGATGG;GTAAGTCCATCCCATATACA;TGATGTTATAATGCAGAGGA;TCTTCTAGTAGTAATATCAT	0.07;0.31;0.84;0.92	54760;65367;77155;77827	1.08E+00;9.46E-01;8.87E-01;3.99E-02	1807;2479;14267;24874	2.26E+00;2.02E+00;1.72E+00;1.07E+00
	Exosc3	0.526057	1.7541	4	CGATCACTATGCCAATCACG;TGGGCTCCTTGTGACGCAGG;CTTTATTAGCGACCACACAC;GCACCCGCATTCAGGCGTAA	-0.68;0.05;1.17;1.56	15526;53634;79021;79494	1.52E+00;5.37E-01;3.91E-01;3.03E-03	140;613;26000;64108	3.46E+00;2.16E+00;1.03E+00;3.77E-01
	Chrd	0.525973	1.65078	4	GAAGGGATTCTATGGCTCAG;GGTAGGTACAGGTAGCGAGG;TGACTGCCCTATGCTACAGT;TCAAACAGGATGTTGCCTGT	-0.07;0.29;0.71;1.18	46561;64852;75647;79030	8.63E-01;7.76E-01;7.65E-01;1.32E-02	604;3987;14782;33073	1.87E+00;1.68E+00;1.53E+00;1.53E+00
	Pdlim4	0.52475	1.94888	4	ATTGACCCTGAGTCCCAGGT;TGGCTTGGATCAAGTCACCT;CCGGTTCCGAGGGAGAACCC;CCGAGAGCGTAAGATGATCG	0.33;0.51;0.59;0.68	66211;71747;73528;75172	1.80E+00;1.32E+00;6.17E-01;1.00E-01	4462;6106;7887;13423	3.09E+00;2.46E+00;1.52E+00;7.25E-01
	Zfp654	0.524736	1.56258	4	GGTTCCTAAATATGCATGCA;TCATAGTCATCATCACACTG;AATGGGAATTCAAATACTAA;GCTTCATGTTCATATAACAG	0.03;0.13;0.33;1.61	52414;57632;66255;79519	9.78E-01;6.20E-01;4.12E-01;2.49E-03	115;13379;22002;27220	2.24E+00;1.86E+00;1.21E+00;9.31E-01
	Drd3	0.523481	1.71393	4	GACAGGGCGTAGTAGGCATG;TGTACACATCATGACATCCA;ACTGGCTGTTCTGTCGAGTG;GCAGAGCTCCTGTCGACGTG	0.17;0.31;0.52;1.09	59559;65650;71990;78753	1.32E+00;9.01E-01;5.47E-01;1.93E-02	881;7644;13984;20075	2.39E+00;1.75E+00;1.37E+00;1.35E+00
	Olfr955	0.522599	2.18022	5	AAACAAATAGACAGATAGGA;TACAGAAAAACAATCTTAGC;CTGTTTGTTGATGGTAGCTG;TGTTGCAGAATGTCACATGT;GAGCTATGCATTCTGGGTAC	0.37;0.37;0.49;0.5;0.88	67757;67813;71281;71603;77493	2.68E+00;1.63E+00;1.10E+00;4.82E-01;5.92E-02	2141;8031;8353;11821;11877	4.13E+00;2.68E+00;2.03E+00;1.13E+00;9.19E-01
	NO_CURRENT_256	0.516664	1.70107	4	TCGGAATTCCGCAGGCCGAG;TCGGACTATAGCGTGAACGT;TCGGAACAACGCCGGCGAGA;TCGCTTCTGATTGATCCACG	0.12;0.15;0.8;1.0	57022;58531;76812;78316	1.18E+00;8.96E-01;6.43E-01;2.90E-02	1318;2822;21103;22612	2.19E+00;2.15E+00;1.26E+00;1.20E+00
	Ccl4	0.515342	1.79686	4	GTGGGAGGGTCAGAGCCCAC;AGAAGGCAGCCACGAGCAAG;GCTTCTGTGAAGCTGCCGGG;GCTTCACAGAAGCTTTGTGA	-0.43;0.63;0.83;1.03	26766;74445;77047;78500	1.65E+00;9.29E-01;4.05E-01;2.49E-02	1134;2587;5189;52868	2.99E+00;2.23E+00;1.26E+00;7.12E-01
	Kiz	0.515042	1.6091	4	TGCAGGCAGGAATTAACTCG;GGCTCCTGGATTCGACAGTG;ACTTAATCTTTCCTGTAACG;GTTCTGAAGCTGCCATCATG	-0.12;0.11;0.83;1.23	44089;56667;77129;79142	9.42E-01;7.06E-01;5.97E-01;1.07E-02	492;2505;22968;35545	2.25E+00;1.62E+00;1.40E+00;1.17E+00
	Clasrp	0.514142	1.75603	4	GATGTGCACGAACATCAAAG;CTGACACTTACCGCTTATAG;TGTAACTACGAGCGGTACAG;GTCTCCATCAGCCATGCCGT	0.27;0.33;0.46;1.0	63898;66128;70487;78343	1.61E+00;9.24E-01;4.97E-01;2.84E-02	1291;9148;13506;15736	2.82E+00;1.79E+00;1.21E+00;1.21E+00
	Wrn	0.51403	1.63644	4	ACTCCAGTCAGTGTAGGCGA;TGTGTCCGAAATAGGTCTTG;CTGGCATGAAAATTAGCGAA;AGTAAATTAAAACTACTGCC	0.08;0.31;0.39;1.27	55337;65700;68372;79209	1.10E+00;9.03E-01;4.46E-01;9.27E-03	425;11262;13934;24296	2.06E+00;1.75E+00;1.68E+00;1.05E+00
	Polr2k	0.513527	1.55274	4	CGAAAATGAGATAAAGTCCA;CCTCCACAAATATATATCAT;CCACATTCTCTGCATCTGAT;CCAATGATATATATTTGTGG	-0.59;0.41;0.45;1.78	19138;68995;70264;79565	1.09E+00;4.90E-01;3.75E-01;1.48E-03	69;9370;10639;60496	2.46E+00;2.08E+00;1.19E+00;4.77E-01
	Bivm	0.513113	1.69132	4	CTGGAAATACAACACTCATG;GAAGCACCCATAGCGCCCAG;TTATCAATCTCCCATGCAAG;AAGTGTTAGACCTTAGGCGA	-0.19;0.39;0.87;0.98	39691;68548;77412;78245	1.06E+00;9.89E-01;5.99E-01;3.05E-02	1389;2222;11086;39943	2.36E+00;2.03E+00;1.20E+00;1.18E+00
	Irf1	0.51167	1.84598	4	CTGTAGGTTATACAGATCAG;TTAATTCCAACCAAATCCCA;GCTGTGTGGAGATGTTAGCC;CGGAGCTGGGCCATTCACAC	0.32;0.43;0.49;0.81	65816;69653;71223;76901	1.76E+00;1.14E+00;5.20E-01;6.06E-02	2733;8411;9981;13818	3.04E+00;2.16E+00;1.27E+00;9.08E-01
	2010300C02Rik	0.510951	1.65017	4	TTCTTGGGAGAACACCCGCA;CCTGTCGTGGACCCTAGATG;AGAGACATGTCACCTCCCGA;TCTGATGTACTCTCCACTAG	-0.1;0.29;0.81;1.04	45247;64851;76913;78534	9.10E-01;8.63E-01;7.38E-01;2.41E-02	1100;2721;14783;34387	2.18E+00;1.68E+00;1.46E+00;1.28E+00
	Olfr318	0.50929	1.73523	5	GAGGGCTTCAGATCCACCCA;ACCCAAGGTCAGAAACACAA;GTCTTCGGTCCAGCCTGATG;GAGGACTGTATGCTCATACT;TCTTCCTACTCATGAGCACA	0.02;0.19;0.24;0.52;1.58	51949;60345;62739;72079;79505	1.32E+00;1.09E+00;6.57E-01;4.97E-01;3.49E-03	129;7555;16895;19289;27685	2.29E+00;2.09E+00;1.88E+00;1.23E+00;1.18E+00
	Iscu	0.508519	1.83408	4	TTCATGACGTCACCACATGC;CCAGCTCCTTAGCCACAGAG;GGCCAGGCTCTACCACAAGA;TATGAAAACCCTCGGAACGT	-1.03;0.34;1.07;1.65	5872;66560;78686;79532	1.34E+00;9.47E-01;6.30E-01;2.20E-03	102;948;13074;73762	3.08E+00;2.29E+00;1.83E+00;1.33E-01
	Cyp3a16	0.508496	1.96162	5	TGTCCACTCACCTACTGACA;AGATATGGGACCTGTACACA;TCAGATAAATAAAGTCCACG;CCTTCTGCTTAGAATCCAGG;GTCTTCACAAACCGGCAGGT	-0.26;0.36;0.71;0.8;0.94	35817;67337;75616;76786;77956	1.66E+00;1.58E+00;8.11E-01;6.86E-01;4.62E-02	1678;2848;4018;12296;43817	2.94E+00;2.62E+00;1.94E+00;1.30E+00;1.01E+00
	Mettl8	0.508054	1.69628	4	AAGAATACAGCAAAGGACCT;AAAGTCGCAGCAGTAGAGAA;TGTGTTCAAAAACTTTGGCG;TCTTCATTTACCTGTCAGGG	-0.46;0.58;0.67;1.25	25004;73323;75036;79173	1.50E+00;7.14E-01;3.92E-01;1.01E-02	461;4598;6311;54630	2.74E+00;1.75E+00;1.64E+00;6.55E-01
	Immt	0.507213	1.68479	4	TGAGCTGATCAATGCGACGA;CTCTGCAGCAGTTATATGAG;AAAAATCTCCAGTGTATCAG;AAATCTACGTCTGAAACCAC	0.06;0.17;0.86;0.93	54389;59582;77336;77930	1.06E+00;9.76E-01;6.72E-01;3.76E-02	1704;2298;20052;25245	2.33E+00;2.00E+00;1.32E+00;1.10E+00
	Cmtm5	0.506862	1.64884	4	TCGCCGGGAACGGCCCCCAG;GAAGCGCTGGTAGTACTGCG;GCTAGAGTTCCTCATCACAC;CGATGGCGCTGAGACACCGG	0.06;0.38;0.46;1.12	54080;68148;70529;78857	1.05E+00;1.04E+00;4.98E-01;1.70E-02	777;9105;11486;25554	1.99E+00;1.97E+00;1.42E+00;1.21E+00
	Ccdc167	0.505168	1.65888	4	AGGAAAAGCTGTCCCGGTGT;ATTTCAGATTGACGGGCTAG;CGTGACCTCCCAGCTTTACA;GAATCTTGGTGTCGCTCAGG	-0.45;0.17;1.05;1.25	25837;59653;78582;79167	1.29E+00;6.74E-01;3.98E-01;1.02E-02	467;1052;19981;53797	2.99E+00;1.64E+00;1.32E+00;6.81E-01
	Fbl	0.504898	1.83322	4	GCAGCTCTCTCTTACAGGTG;TGATGAGGTCACGGCCAGAG;GGTGGAGGTCGAGGTCGAGG;CCGCGACAGATAAAGACACC	-0.95;0.22;1.23;1.52	7473;61749;79124;79472	1.60E+00;7.40E-01;5.54E-01;3.52E-03	162;510;17885;72161	3.62E+00;2.09E+00;1.45E+00;1.71E-01
	Ubqln5	0.50468	1.7116	4	GCTGGCTGAAGAAATCAGCT;TCAGTATGTCTTGATCCCGG;GTAAGTCTAGCATACCAGGT;TTTCTGCCAGAAAAAACTCG	0.14;0.43;0.5;0.95	57992;69677;71460;78048	1.23E+00;1.14E+00;5.28E-01;3.49E-02	1586;8174;9957;21642	2.26E+00;2.16E+00;1.29E+00;1.12E+00
	Hoxd9	0.503879	1.67756	4	TTTGGGGGCAAAACTACACG;ACGCTACGTACGCTCCTGGA;CCGCGCGCTTTGGGCCACCG;TTTCAGGCTTAATCCCGTAG	0.11;0.38;0.55;0.98	56371;67976;72721;78243	1.15E+00;1.03E+00;5.78E-01;3.06E-02	1391;6913;11658;23263	2.14E+00;1.97E+00;1.42E+00;1.18E+00
	Brca1	0.500342	1.52821	4	TTAAGCGCGTGTCTCAAGGG;AAGTACATCCCTTCAACCTG;TGTTATCCAAGGAACATCGG;CATCTTGAGCAATCTATGAG	-0.35;0.05;0.81;1.48	31234;53756;76904;79448	9.08E-01;5.40E-01;4.53E-01;4.04E-03	186;2730;25878;48400	2.18E+00;2.03E+00;1.03E+00;8.65E-01
	Hoxb9	0.500089	1.66771	4	CGGGCCAGTACGCGAACCCG;GGGGACAATAAAATTTGCGA;GATCATAAGTCACGAGAGCG;GAAGTTTCCAAACTGTACTC	0.02;0.34;0.73;0.91	51893;66799;75926;77769	9.60E-01;9.58E-01;7.92E-01;4.11E-02	1865;3708;12835;27741	1.93E+00;1.85E+00;1.83E+00;1.06E+00
	Plin5	0.499502	1.76319	4	GAATGTGGTGAATCGAGTGG;AGGGACTTAGACTCACACTG;ATGGTGGACCTGGCCCAAAG;GCAGAGCAAACACCGTACCC	0.28;0.35;0.51;0.85	64438;67144;71726;77306	1.65E+00;9.79E-01;5.37E-01;5.15E-02	2328;7908;12490;15196	2.88E+00;1.89E+00;1.32E+00;9.71E-01
	Mageh1	0.497953	1.61876	4	AGAATACCTGAGCGGCCCGG;GGTGCCCTGAAAATTGCTCC;TCGGCGCCGCCGGAACGCAA;ACAGAAGAGTTTGTGCGCAG	0.08;0.33;0.46;1.13	55163;66181;70374;78876	1.09E+00;9.27E-01;4.93E-01;1.66E-02	758;9260;13453;24471	2.05E+00;1.80E+00;1.43E+00;1.20E+00
	Det1	0.497342	1.82074	4	TCTGCTGCACATTACCAACG;GCTGCACAGACAATATGGCC;CTTGAAATCTATGAGTACCA;GCGAGGACGTAGTGACGCTG	0.32;0.36;0.58;0.72	66099;67379;73430;75867	1.79E+00;9.93E-01;6.12E-01;8.42E-02	3767;6204;12255;13535	3.08E+00;1.91E+00;1.51E+00;7.86E-01
	Rnf208	0.496335	1.62875	4	AACTCAGAACTGCCTTTGCG;TTGTCAACCAGGCATGTGGG;ATACATACAACGTCACTCAA;AATCAGTATGTGATTCGACC	-0.37;0.45;0.74;1.17	29841;70205;76098;78989	1.18E+00;8.10E-01;4.36E-01;1.41E-02	645;3536;9429;49793	2.23E+00;1.97E+00;1.50E+00;8.16E-01
	Zfp790	0.496274	1.59397	4	TTTCAGATACAGATTCCCGG;GCTGTGGCTCAGACCTGACT;TCGCCCTAGATCATACCCAG;TCTTAAAAAAATTCATAACA	0.05;0.15;0.69;1.1	53437;58356;75321;78795	1.02E+00;7.37E-01;6.38E-01;1.84E-02	839;4313;21278;26197	1.93E+00;1.80E+00;1.39E+00;1.25E+00
	Mydgf	0.495001	1.66534	4	TTCCCAAGGAGGGACCAACG;CAGTTCAAGGCTGAGTTGCG;CATTCGTTCTCCCAGGACGT;CCTCACGTCAAATGGCACGG	0.18;0.28;0.54;0.97	60202;64497;72510;78172	1.36E+00;8.47E-01;5.68E-01;3.22E-02	1462;7124;15137;19432	2.45E+00;1.65E+00;1.40E+00;1.16E+00
	Tsen34	0.493338	1.60456	4	GCTCCTGGCCGAGATAGGCG;GATTCAGGGGCAGATGAAGG;AGATGAAGAATCTAGGGATG;GCTTCTAGAGAAGATCGTAG	-0.19;0.3;0.83;1.03	40136;65010;77125;78472	9.41E-01;8.70E-01;6.09E-01;2.55E-02	1162;2509;14624;39498	2.25E+00;1.69E+00;1.25E+00;1.22E+00
	Tmc6	0.491837	1.79967	4	GACCAGAAAACGTAGGCACG;TACCGGGTTGGCAGTACCAA;GGAGTCATGTCGCTCCAGAG;TTTCCAAGGTCGCAGCCGTG	0.33;0.37;0.48;0.78	66498;67774;71017;76589	1.82E+00;1.02E+00;5.13E-01;6.77E-02	3046;8617;11860;13136	3.13E+00;1.95E+00;1.25E+00;8.66E-01
	Plekho2	0.491605	1.50573	4	GGAGGCATGAGAGCCCGAGG;AACAAGAATCCACTTAAAGG;GCTGCGATCCCCAGGGAACA;CTCAACGAAGGGATCAACCG	-0.01;0.16;0.36;1.45	50511;59059;67327;79431	9.06E-01;6.57E-01;4.28E-01;4.41E-03	203;12307;20575;29123	1.99E+00;1.75E+00;1.29E+00;9.90E-01
	St6galnac1	0.49027	1.64327	4	AGTGTCATGATGGGTACTTG;ATACACTTGGAGTACCCAGT;AGTCCAAGGAGAGCAAGCTG;ATCTTTCTACACAGACTGAG	-0.08;0.47;0.62;0.94	46375;70876;74229;77996	1.24E+00;7.70E-01;6.58E-01;3.61E-02	1637;5405;8758;33259	2.32E+00;1.62E+00;1.52E+00;1.11E+00
	Fbxl20	0.489037	1.59462	4	AACAACGTTTACCTAAGTCG;GAAAATATTTCAAAACGATG;GAACTTGCTAAGGCTAGTGC;GGTTTAAAGTCACTAGCTCA	0.11;0.17;0.59;1.08	56814;59700;73626;78702	1.17E+00;6.75E-01;6.23E-01;2.04E-02	932;6008;19934;22820	2.17E+00;1.53E+00;1.34E+00;1.33E+00
	Ceacam12	0.488836	1.5535	4	AAATTGAGTTTGTGCCACCT;GCTACCAATTCTAGTGTGAT;AATAGTTATCTGGGCAGTAG;ACGCATTATTTCACGTCTTG	-0.59;0.19;0.85;1.5	19161;60426;77286;79458	9.67E-01;6.97E-01;3.75E-01;3.82E-03	176;2348;19208;60473	2.31E+00;2.06E+00;1.37E+00;4.78E-01
	Luc7l2	0.48819	1.54714	4	GGATGAAGTCGAGAAAGCAC;TTCTCCAAGATCCATTCTCT;GCAGAAACTTCGTGTCTGCG;AGAAGAGATAAGTGCTGAAG	-0.09;0.25;0.65;1.14	45670;63193;74735;78917	7.93E-01;7.50E-01;6.92E-01;1.57E-02	717;4899;16441;33964	1.70E+00;1.55E+00;1.48E+00;1.46E+00
	Xrn2	0.488137	1.57654	4	TCTCTACATGGCAATAGATG;GTTTAAATAATGACCCTGGG;AGGACTGAACAACCTTACGT;GGTTAACATATACAAAAACG	-0.02;0.17;0.75;1.05	49510;59739;76164;78608	8.71E-01;8.17E-01;6.76E-01;2.25E-02	1026;3470;19896;30113	1.98E+00;1.69E+00;1.33E+00;1.30E+00
	Med19	0.487751	1.57658	4	GAGGCGGAAACCAGACAGCA;GAATAGGAGGCTTCTCAATG;TTTAATCACACACTACAACC;GGAGATCAATCATCCCTGGC	0.02;0.16;0.71;1.07	51834;58857;75664;78662	9.56E-01;7.67E-01;6.51E-01;2.13E-02	972;3970;20778;27800	1.87E+00;1.83E+00;1.33E+00;1.28E+00
	Gm20939	0.487075	0.975626	1	CCCTATGAATGTAAGCAATG	0.49	71211	0.0485	8423	0.976
	Fam19a4	0.4862	1.73152	4	GGTCACCACCTGATCAAGCC;ACAGCAGACCATTAACACAT;GCCTCGAGCCAGCACCTCCG;TCTGAGAGCGCTCCTCTATG	-0.17;0.62;0.7;0.79	41053;74278;75538;76671	1.63E+00;7.56E-01;6.30E-01;6.58E-02	2963;4096;5356;38579	2.95E+00;1.85E+00;1.26E+00;8.77E-01
	Ackr3	0.485905	1.68184	4	ACACCAAGATGCATACAACA;CCAACAATGAGACCTACTGC;GGTCCACGCTCATGCAGGCG;GCATAACCAGTGGCCCATGG	-0.11;0.53;0.68;0.83	44742;72383;75255;77128	1.39E+00;7.31E-01;7.23E-01;5.55E-02	2506;4379;7251;34891	2.56E+00;1.79E+00;1.43E+00;9.42E-01
	Zfyve27	0.485697	1.60242	4	CTCACTGTGAGGACACCACG;CCTTACCCTCGTTCAAAGTG;ACGGTGTTCGATACTTGCTA;GAAGAGTGTGCTATTTAACA	-0.01;0.25;0.76;0.94	50103;63134;76359;77975	8.92E-01;8.39E-01;7.91E-01;3.66E-02	1659;3275;16501;29531	2.03E+00;1.72E+00;1.55E+00;1.11E+00
	Parpbp	0.485466	1.53165	4	AGTGAATTCAAAGAATGACC;TCTGAAAGAACTACGTTATG;AACCATGATACTGCCTACTG;TCAGTGATGTCTTACTGACA	-0.55;0.02;0.9;1.57	21024;52075;77667;79499	1.04E+00;5.12E-01;3.76E-01;2.93E-03	135;1967;27560;58611	2.46E+00;2.17E+00;9.65E-01;5.32E-01
	Pibf1	0.485419	1.46989	4	GCTCGTGAACCCATTAAGAA;AAGGAATGAATTATCAAAGG;TCATCATCAGAGGAGCGAGA;TCGTTCATACATTTCCCTAG	-0.08;0.2;0.31;1.51	46471;60876;65495;79462	7.73E-01;7.11E-01;4.03E-01;3.73E-03	172;14139;18758;33161	2.07E+00;1.52E+00;1.40E+00;8.93E-01
	Abcb1b	0.485363	1.4927	4	AGCCTTTGCAAACGCACGAG;TGATGCTTCTAGTGTTAAAG;TCATCTCTTGAAAAAACCTG;CAGATGACAATCCAATAAGA	-0.26;0.28;0.56;1.36	35690;64488;72953;79340	8.47E-01;5.88E-01;5.21E-01;6.40E-03	294;6681;15146;43944	1.84E+00;1.65E+00;1.45E+00;1.03E+00
	Pold2	0.484737	1.54703	4	GCTCTGCGAAAGATGACGGG;CCACTTGACACAGACAGGTG;ATACCTTACCAAGAAAACCC;GGGTGGATATATTTGCTCCG	-0.07;0.21;0.69;1.1	46915;61369;75414;78802	7.87E-01;7.45E-01;7.27E-01;1.82E-02	832;4220;18265;32719	1.82E+00;1.55E+00;1.43E+00;1.39E+00
	Scaf1	0.483858	1.62749	4	GGTTTCGGTGGAAGTCGTAA;CCAGGCGTCGAGTCCTTAGG;AGTAGGTCGCCCCGACAAAG;ATCATAGATGTCGAATCTCG	-0.03;0.45;0.58;0.93	49360;70177;73423;77916	1.18E+00;8.66E-01;6.12E-01;3.79E-02	1718;6211;9456;30274	2.23E+00;1.68E+00;1.51E+00;1.09E+00
	Safb	0.482971	1.65256	4	CAGCGTGGCAGACTGTGTGG;CCTGTTTAGCAGATATGGGA;GCATGGCAAGATGATCTCAG;CCTCTGCTTACAGGAAGCCG	-0.18;0.49;0.75;0.87	40457;71343;76180;77466	1.28E+00;8.19E-01;6.16E-01;4.79E-02	2169;3454;8291;39178	2.39E+00;1.99E+00;1.23E+00;9.99E-01
	Rictor	0.482957	1.3485	4	TACCTGGATCTAGCACGATG;ATATTGGCTCATCGAATTGG;TGACATTCAGCAGAGCAACG;TTCTTAATCATCCAAAGACC	-0.26;0.08;0.17;1.94	35784;55198;59776;79582	5.66E-01;5.23E-01;3.75E-01;1.11E-03	52;19858;24436;43850	2.58E+00;1.10E+00;1.04E+00;6.77E-01
	Dpagt1	0.482028	1.76073	4	CATGCCCGCAAAGTAACAGA;AGCACCGCTGATCACTCCCT;CTTTGGCAATACAACCATCG;TCCTGTACTACGTCTACATG	-1.12;0.41;0.89;1.75	4353;68944;77589;79562	1.09E+00;1.02E+00;7.33E-01;1.55E-03	72;2045;10690;75281	2.44E+00;2.43E+00;2.08E+00;9.76E-02
	Gtpbp2	0.481732	1.56883	4	TGAAATCTACACAGTCCCAG;ACTGGACAGTGTAAATATAG;CCAGTTCCTAGATCTCCGTG;GCGAACTGTCCTCTCCACTG	-0.15;0.07;0.91;1.09	42370;54520;77801;78760	1.07E+00;6.61E-01;5.53E-01;1.91E-02	874;1833;25114;37264	2.52E+00;1.37E+00;1.32E+00;1.07E+00
	Olfr44	0.481487	1.55839	4	AAGAACATCATATCCTACCC;AATGTAAATTTGATAGGACA;TTTATATGATCACTGTAGCA;TAGAGCATGCAAGCTTCAAG	-0.4;0.29;0.83;1.2	28467;64537;77093;79083	9.36E-01;8.49E-01;4.21E-01;1.20E-02	551;2541;15097;51167	2.24E+00;1.66E+00;1.57E+00;7.68E-01
	Klk1b24	0.481042	1.57006	4	CCAAACATTATACTGGCTGG;ACCACACGAGACTGGACAGG;GGACCATACTCACATTTCGT;GCGGGATGTCATCATTCAGG	-0.22;0.34;0.76;1.05	37927;66783;76273;78589	9.59E-01;8.29E-01;5.63E-01;2.29E-02	1045;3361;12851;41707	2.01E+00;1.85E+00;1.30E+00;1.12E+00
	Krtdap	0.479379	1.70496	4	GGGGCATCCCACGATATACC;GATCCCAATTCTTCCCGTCG;TAATTACCCTACCGCAACAG;CTGGCATTGCATGCGGTCCA	-0.44;0.66;0.69;1.0	26409;74883;75323;78372	1.72E+00;7.37E-01;4.02E-01;2.77E-02	1262;4311;4751;53224	3.10E+00;1.80E+00;1.22E+00;7.00E-01
	Zfp407	0.479207	1.57336	4	TGCCGAATCTACTTCCTCTG;CAAGAACATCACTATACCCG;GAAAGCTATTACCCAACACT;TTAGCATACTCTGTTCACGT	-0.13;0.28;0.79;0.97	43515;64407;76661;78191	8.76E-01;8.43E-01;6.91E-01;3.17E-02	1443;2973;15227;36119	2.11E+00;1.65E+00;1.37E+00;1.16E+00
	Elob	0.479169	1.57846	4	CGAACTGAAGCGCATCGTCG;GATGCGCTTCAGTTCGAACA;CTTGGCGTCCGTAAAGATGG;GCTTCACTAGCCAGACAGCA	-0.72;-0.47;1.03;2.07	14336;24585;78481;79591	1.26E+00;5.63E-01;4.01E-01;9.16E-04	43;1153;55049;65298	2.91E+00;2.67E+00;3.89E-01;3.45E-01
	Nat8f1	0.478495	1.46643	4	CACCCCAAGTAAGAGCAGGA;TGTGTTCACCAAGGGCATGG;CAAATGTTTGCAGACAGACA;TCAAGGATCCTCCACTAGGG	-0.11;0.25;0.3;1.48	44741;62962;65041;79444	7.84E-01;7.23E-01;3.99E-01;4.13E-03	190;14593;16672;34893	2.02E+00;1.54E+00;1.43E+00;8.72E-01
	Il11ra2	0.477378	1.19179	2	AGACATAAGTGCCTTCATCA;TAGGAAGTAAGGTAGCGGGT	0.26;0.7	63308;75503	4.87E-01;4.63E-02	4131;16326	1.38E+00;1.01E+00
	Gm13305	0.477378	1.19179	2	AGACATAAGTGCCTTCATCA;TAGGAAGTAAGGTAGCGGGT	0.26;0.7	63308;75503	4.87E-01;4.63E-02	4131;16326	1.38E+00;1.01E+00
	Gm2002	0.477378	1.19179	2	AGACATAAGTGCCTTCATCA;TAGGAAGTAAGGTAGCGGGT	0.26;0.7	63308;75503	4.87E-01;4.63E-02	4131;16326	1.38E+00;1.01E+00
	Olfr320	0.477357	1.87225	6	CTATGAAAGCCACTGCAAAG;GAGGGCTTCAGATCCACCCA;GAGGACTGTATGCTCATACT;CTCTACCACTGTGCCCAAGG;TGTCTTCACACACCAGTGGA;TCTTCCTACTCATGAGCACA	-0.59;0.02;0.52;0.6;0.73;1.58	19318;51949;72079;73800;75999;79505	1.90E+00;1.23E+00;1.03E+00;6.64E-01;4.40E-01;4.19E-03	129;3635;5835;7555;27685;60316	3.00E+00;2.20E+00;2.02E+00;1.70E+00;1.59E+00;7.24E-01
	Ppp6r3	0.476922	1.60442	4	GTTACATGGGACACCTTACG;GATCTCATTATAAAGCACAT;TTTAATCGAGTATTCCCCAC;GCTGAATGACTCATGCCCGG	-0.2;0.49;0.66;0.96	39418;71220;74870;78084	1.27E+00;7.01E-01;5.93E-01;3.41E-02	1550;4764;8414;40216	2.37E+00;1.72E+00;1.19E+00;1.13E+00
	Pus10	0.476653	1.72965	4	TGAGAAGGGGTTTATTACGA;GTCTACGTCTTCTCGTCCCG;GAGCTTGTTCGAAGTGAGCG;ACCTTACAAACACCCATCCA	0.25;0.42;0.48;0.77	62953;69230;70956;76415	1.54E+00;1.11E+00;5.11E-01;7.17E-02	3219;8678;10404;16681	2.72E+00;2.11E+00;1.25E+00;8.45E-01
	Spats2l	0.475821	1.56944	4	ATGGTCCATGAATCGCTCTG;CAGCGAACGCAAGTATGACG;GAAAAAGATCTCGATACTGG;CGTATACCTACCATCCACAA	-0.19;0.46;0.57;1.06	40041;70543;73151;78624	1.21E+00;6.07E-01;5.98E-01;2.22E-02	1010;6483;9090;39594	2.28E+00;1.47E+00;1.31E+00;1.21E+00
	F10	0.474648	1.59576	4	AGAGGTCCGTGAAATCTTCG;AGCGTGTCGAGATGGCATCG;TTCAATAGGATTCTCCGTAG;GAAAAATCACTACAGGACGT	-0.19;0.31;0.88;0.89	39991;65633;77516;77622	1.01E+00;9.00E-01;6.06E-01;4.44E-02	2012;2118;14001;39643	2.40E+00;1.75E+00;1.21E+00;1.03E+00
	Asb16	0.47407	1.48892	4	AGGGCGTGCTGCCTTGCACG;TTCCAGGAGCTGTCGCGCTG;CAAGGCTAATGTATCGTCTG;AGACGCTGCCAATATGATTG	-0.08;0.06;0.67;1.24	46329;54355;75110;79146	7.69E-01;7.20E-01;5.50E-01;1.07E-02	488;4524;25279;33305	1.76E+00;1.62E+00;1.51E+00;1.06E+00
	NO_CURRENT_132	0.473928	1.65657	4	CGTTATTGTACACCACGCTC;CGTTGCGAATCCACCCTATT;CGTTGTTTGGAGCCCGTCCA;CGTTATATCTACACTTTGCG	0.15;0.28;0.7;0.77	58469;64198;75532;76465	1.26E+00;8.34E-01;7.55E-01;7.05E-02	3169;4102;15436;21165	2.30E+00;1.84E+00;1.63E+00;8.51E-01
	Pip4k2a	0.473797	1.7447	4	CATCAAGACCATTACCAGTG;GGGGGGTCAACCATTCGGTA;GGAAATACGACTTAAAGGTG;GTATATAGTGGAATGTCATG	0.2;0.44;0.59;0.65	61065;70050;73687;74771	1.41E+00;1.17E+00;6.26E-01;1.09E-01	4863;5947;9584;18569	2.53E+00;2.21E+00;1.54E+00;6.94E-01
	Lpar2	0.473524	1.60801	4	GTGTGGCCACTGACGCCGTG;GTGGGCCAGTATGGAACATG;AGTGTGACCACACGGCCCCG;TTTCTATAATAACAGCGGCA	0.16;0.23;0.6;0.91	58841;62176;73775;77780	1.28E+00;7.55E-01;6.31E-01;4.09E-02	1854;5859;17458;20792	2.33E+00;1.55E+00;1.48E+00;1.06E+00
	Pkd2	0.471838	1.51342	4	GGGATCATTGCGTCGTACAG;TTCGGTTGTCAGCTTGCGTG;GCTCGGGAGCTACCGCGGCG;TGCCTGGAGCAGGACGAAAG	0.01;0.14;0.6;1.14	51494;57926;73876;78905	9.43E-01;6.37E-01;6.27E-01;1.60E-02	729;5758;21708;28141	1.81E+00;1.57E+00;1.45E+00;1.23E+00
	Fam46c	0.471175	1.63817	4	GATCGGGGAGAGTATGTACG;GCTGAAATTCCGCCTCTGTG;AGTTTGTCGACTCCATCCGG;GCCTGAAGTCCCGCACAAGG	-0.57;0.26;1.05;1.14	19879;63666;78598;78925	1.30E+00;8.12E-01;3.75E-01;1.55E-02	709;1036;15968;59755	3.01E+00;1.59E+00;1.46E+00;4.99E-01
	Stk35	0.470508	1.73929	4	CTGTAGTCTACCTTTGAGCG;GGGACAGGACATACTGATTG;CGTTCTCGGGAGCGTCGCAG;GAGGGACAAAAAGCCCGGAG	0.25;0.39;0.6;0.65	62901;68232;73793;74743	1.53E+00;1.04E+00;6.32E-01;1.10E-01	4891;5841;11402;16733	2.71E+00;2.00E+00;1.56E+00;6.92E-01
	Lrfn2	0.470141	1.48693	4	GCGACCCTTGAGACTTCCGG;CAACCGGCTACCTAGCCTTG;TGGAACCTGTGATGTCCGAA;GTCCTCCGGTCAATGTCAGG	-0.01;0.23;0.36;1.31	50265;62117;67249;79276	8.97E-01;7.53E-01;4.26E-01;7.81E-03	358;12385;17517;29369	1.75E+00;1.73E+00;1.48E+00;9.85E-01
	Vmn2r10	0.469941	1.56809	4	CATCAAGGAGACCATTGCAT;TTCAGAAAAGAACTATACTG;CAGCAAATGACAGTACCCAA;TTTCTGAGTCTAGACTGGGG	0.05;0.23;0.67;0.92	53431;62413;75108;77858	1.02E+00;7.64E-01;7.20E-01;3.92E-02	1776;4526;17221;26204	1.93E+00;1.76E+00;1.50E+00;1.08E+00
	Hpgds	0.469581	1.65846	4	CTTGATCTTTCTCTGCCCAT;AGATATTTGACCAAAAACAC;GTCCTTCCACCTCCAAAACA;GCAATGTCAAGCTGATGCAG	-0.03;0.51;0.63;0.76	49171;71891;74414;76353	1.34E+00;8.59E-01;6.70E-01;7.31E-02	3281;5220;7743;30463	2.48E+00;1.67E+00;1.65E+00;8.38E-01
	Gstz1	0.469129	1.57208	4	ATTTCTGACCTCATCGCTAG;TAATGACTCACCGTTAAAGC;AAGAGACTCGGCCTATCCCA;GTCAGAAATCATGCGCACGA	0.15;0.26;0.39;1.08	58790;63295;68334;78708	1.28E+00;7.97E-01;4.45E-01;2.03E-02	926;11300;16339;20844	2.33E+00;1.56E+00;1.35E+00;1.05E+00
	Ccdc38	0.46888	1.59192	4	ATCTTGGGAATACTGAACCA;GCTCCTCCTATGAACGTCTG;CTTTCTAGAGGACGAGCTCG;GAAGAATGGAGTTCAAGGCG	0.12;0.14;0.73;0.89	56896;58138;75910;77607	1.18E+00;7.91E-01;6.33E-01;4.48E-02	2027;3724;21497;22738	2.18E+00;1.92E+00;1.24E+00;1.03E+00
	Lsm6	0.468127	1.48411	4	CTGGCGTGGATTATCGAGGT;TCTGCTTTAAGAAGTCGCTA;GGTGAAATTAAATTCTGGCG;TCTTAAAGCAGATCATCGGA	-0.22;0.35;0.49;1.25	38368;67032;71201;79181	9.73E-01;5.72E-01;5.19E-01;9.89E-03	453;8433;12602;41267	1.87E+00;1.65E+00;1.27E+00;1.14E+00
	Cyb5d1	0.467967	1.50587	4	CCAATGATTTCGGAGTACCC;AGCGGAACACAACCAGCTCG;CAATCTAACACCGCTTGTCG;GCATGAGATACCGTACCCCG	-0.73;0.15;0.78;1.66	13780;58788;76619;79538	8.70E-01;6.50E-01;4.07E-01;2.07E-03	96;3015;20846;65854	2.32E+00;2.10E+00;1.28E+00;3.30E-01
	Trip6	0.466585	1.65207	4	AGGTCGTGGTGAAGTCTGGG;TCACCAAAGTACTCCCCACT;CTCCCAGCATCCCACTATGG;GGGGTCGCAGTCATGCACCT	-0.21;0.6;0.65;0.84	38573;73746;74676;77139	1.55E+00;6.88E-01;5.76E-01;5.53E-02	2495;4958;5888;41061	2.82E+00;1.69E+00;1.15E+00;9.43E-01
	Itgb1bp2	0.464877	1.58422	4	TTCCTGTCGCTATCACCCTG;AGGGCTTGAGATATAAGAAG;TGGCCTTCTTAGGTTTACCA;TCTTACCCCTCATGAAACCG	0.16;0.21;0.58;0.91	58827;61418;73489;77753	1.28E+00;7.29E-01;6.15E-01;4.15E-02	1881;6145;18216;20807	2.33E+00;1.52E+00;1.43E+00;1.06E+00
	Tubb6	0.463791	1.56446	4	GACCAGGCCGGAGGCTACGT;AGCTAAGAAGTACGTACCCA;CTGGGCCAAGGGTCACTACA;GCCAGGGAAACGCAGTGATG	-0.08;0.39;0.65;0.9	46008;68496;74729;77657	1.06E+00;7.59E-01;6.91E-01;4.37E-02	1977;4905;11138;33626	2.03E+00;1.70E+00;1.50E+00;1.04E+00
	1810022K09Rik	0.462881	1.65581	4	AGCTATATGAAATACATTCC;TGGCCAAGAACAAATTAAAA;AACTTTCAAGGCTAAAAACA;AGTTACTACTAATCTTAAGA	0.19;0.33;0.6;0.74	60509;66130;73715;76081	1.38E+00;9.25E-01;6.27E-01;7.93E-02	3553;5919;13504;19125	2.48E+00;1.79E+00;1.55E+00;8.08E-01
	NO_CURRENT_288	0.461287	1.53371	4	TTCCCAATAACATTATGGGG;TTCCAGTATACCGAATTCGC;TTCATCGCAGATCGATTTCG;TTCATCCTTCGTAGCGCAGC	-0.13;0.33;0.71;0.94	43352;66241;75606;77986	9.30E-01;7.62E-01;6.86E-01;3.63E-02	1647;4028;13393;36282	1.86E+00;1.80E+00;1.37E+00;1.11E+00
	Rdh12	0.460134	1.60147	4	CCCAAAGATACTTACCCAGG;CAATTTCCGCACTAGCACCT;TGCTAGGAAGCGTTCAGCAA;GGAAAGGTTGACCACCCGTG	-0.55;0.55;0.66;1.19	20790;72694;74884;79046	1.42E+00;7.03E-01;3.75E-01;1.29E-02	588;4750;6940;58844	2.62E+00;1.72E+00;1.54E+00;5.26E-01
	Cidea	0.459508	1.49366	4	CATGACCGAAGTAGCCGGCG;GCGAGCTGGATGTATGAGGG;TCCCTTGCAAACCTAGACTC;AAAGGGACAGAAATGGACAC	0.06;0.11;0.54;1.12	54263;56354;72622;78863	1.05E+00;5.90E-01;5.73E-01;1.69E-02	771;7012;23280;25371	1.99E+00;1.42E+00;1.41E+00;1.15E+00
	Rnf166	0.45815	1.48273	4	ATCTCAGCCCATCCCCAGGT;TCTGCCTGGAGGTGTACCAT;GAGTTGCTTCTCTACATGGG;TTCTTGTTGCAACCCCGACA	-0.14;0.34;0.5;1.13	42811;66836;71600;78870	9.62E-01;6.72E-01;5.33E-01;1.67E-02	764;8034;12798;36823	1.86E+00;1.43E+00;1.34E+00;1.31E+00
	Yif1a	0.457937	1.59354	4	CCACTTGTATCATCGAAGAG;GCACCTCCATAGCATCCCAA;CCTATGTCGCTAAGAAGCTA;GCATTGAGATCTTTCCGCGG	-0.02;0.41;0.66;0.78	49550;69051;74907;76584	1.10E+00;8.72E-01;7.04E-01;6.78E-02	3050;4727;10583;30084	2.09E+00;1.73E+00;1.69E+00;8.66E-01
	Bcl2l14	0.457475	1.65477	4	TTCCCGGTAGAGCGGCAGAG;GGCTTGTATTGCCAACAGAG;CCTTTATTCTTAGAGTCACA;TTGGAGAACACTCTTCAGGG	-0.32;0.6;0.73;0.81	32607;73856;76004;76919	1.57E+00;8.00E-01;4.72E-01;6.02E-02	2715;3630;5778;47027	2.85E+00;1.94E+00;9.15E-01;9.10E-01
	Pagr1a	0.456988	1.9461	4	TGAAGAGGAGAGATCAGACG;TGTCTCGGCTAGTAAGGCCG;GCGAGCGACGAGCGTGCGGA;AAGCAGAGATCCTACCCCGC	-1.12;0.55;1.17;1.22	4377;72825;79019;79114	1.52E+00;1.44E+00;7.31E-01;1.14E-02	520;615;6809;75257	3.45E+00;2.64E+00;1.59E+00;9.82E-02
	Hspb9	0.456142	1.50537	4	CGAGTCGAATGACCCGAGCA;GGATGCCCAAGGTTTCGCTC;CCTTGCTGAACGGAATCAAG;CCCCAACCCCCCATCCGGGG	-0.21;0.42;0.54;1.08	38439;69373;72542;78703	1.12E+00;5.73E-01;5.70E-01;2.04E-02	931;7092;10262;41195	2.13E+00;1.40E+00;1.35E+00;1.15E+00
	Kctd20	0.455888	1.4735	4	ACTCACTCAGATCCTGACAT;GCATTATGTGAGGATGCGGA;GGGGGAGTATGTGATCGCGG;GCAGTTTGACCACTACCTCG	-0.26;0.18;0.78;1.13	35813;59946;76544;78884	8.61E-01;6.82E-01;5.23E-01;1.64E-02	751;3090;19688;43821	2.08E+00;1.44E+00;1.34E+00;1.04E+00
	Tmc1	0.455821	1.47213	4	TGCCGTACGGTAAACCCCAG;TGAAGGCCAATATTACCCTG;TTCAGCAAATAAGTCAAACA;TGAAGTTCTCAAAATCTCGG	-0.49;0.04;0.87;1.41	23456;53231;77408;79391	9.89E-01;5.31E-01;3.83E-01;5.29E-03	243;2226;26403;56178	2.35E+00;1.92E+00;1.01E+00;6.06E-01
	Rpl37rt	0.45554	1.11905	2	CACAAGTCGACTTCTGAAGG;AAGTCGACTTGTGGCAAGTG	0.1;0.81	56065;76914	3.80E-01;3.02E-02	2720;23569	1.18E+00;1.06E+00
	Setd6	0.455279	1.63269	4	AATCCTTCTCCACGGCTTCG;CTGACCTATAAGCCATCACG;CCAGGATTATCTCCGGATGG;GGGGACAGAAGCGCGGACCG	0.11;0.46;0.48;0.77	56518;70523;71026;76481	1.21E+00;1.16E+00;5.13E-01;7.02E-02	3153;8608;9111;23116	2.28E+00;2.15E+00;1.25E+00;8.53E-01
	Gdf10	0.453782	1.61462	4	TATGAGAAGTACAACCGAAG;CAGGATGCGTTCTTAGCTCG;GCCCTGACGCCTCCACCACG;GGACTCCCAGCAGTCACCCG	-0.71;0.44;0.85;1.23	14703;69826;77302;79131	1.16E+00;9.70E-01;3.98E-01;1.10E-02	503;2332;9808;64931	2.31E+00;2.18E+00;1.61E+00;3.55E-01
	Tpbg	0.453701	1.5215	4	GAATCACATCGTGCCCCCTG;AAAAGGTTGCGCACGTAAGG;GCTGGGTTGGGTCTCCGCGT;GCCAGCCGAGAGATGCCCCG	-0.01;0.03;0.82;0.98	50011;52530;77024;78197	9.26E-01;8.88E-01;5.19E-01;3.16E-02	1437;2610;27104;29621	2.22E+00;1.72E+00;1.17E+00;9.83E-01
	Tnfrsf21	0.453346	1.51661	4	GATGCACTCTCGGTCAGTCA;AAGGAGACAGACAACGTCTG;ACAATACGAGCTCAACCAGT;GCCTGGTAAAGGTCCCCGCG	-0.39;0.48;0.55;1.17	28890;70895;72852;79015	1.24E+00;5.84E-01;4.25E-01;1.35E-02	619;6782;8739;50744	2.33E+00;1.52E+00;1.44E+00;7.83E-01
	Gbp2	0.4526	1.52432	4	TCTTCTGTCAAGACTCTGTG;AAGTCATCACCTGACCAGAG;AAAGTTCCAGACAGAATTAG;AATTTCCTGATGCACAGTCG	-0.15;0.05;0.94;0.97	42457;53652;77963;78137	1.10E+00;6.64E-01;5.38E-01;3.29E-02	1497;1671;25983;37177	2.60E+00;1.32E+00;1.15E+00;1.03E+00
	Ssu2	0.452553	1.56207	4	GCTGACTCTGGATTCGCTGA;ACTTGTAGCGACCACGCCCG;TCGGTGGACGGACCACAGAG;GAACACAGGTGGCATCTCCG	0.08;0.37;0.45;0.9	55190;67890;70259;77709	1.10E+00;1.02E+00;4.90E-01;4.25E-02	1925;9375;11744;24444	2.05E+00;1.96E+00;1.19E+00;1.05E+00
	Hypk	0.452414	1.5463	4	GAGATCGAAATGGCGACCGA;CATTGGAGACAGACGGTCCA;AGAGCGGGTTACTGACTATG;GAGTTAGAGACCGAGACCAG	0.11;0.33;0.37;1.0	56550;66472;67565;78341	1.16E+00;9.42E-01;4.31E-01;2.84E-02	1293;12069;13162;23084	2.15E+00;1.82E+00;1.21E+00;1.00E+00
	Pirb	0.450741	1.60234	4	TTTAGCCCAAGCCAGCCCTG;CATGTTGTAGTGTCACAGAA;TTTATCGTAGGGAAAGTCTG;GGACATCCTGATCACAGGTG	0.15;0.25;0.67;0.73	58613;62963;75098;75970	1.27E+00;7.84E-01;7.19E-01;8.18E-02	3664;4536;16671;21021	2.31E+00;1.76E+00;1.54E+00;7.96E-01
	Dym	0.450444	1.45411	4	TATCACGTATGAGATAGCAG;TTATAAGGGCCATATAGACA;AGTACCTGATGCAAGGCCCA;TCTTAACTGAGATTTCCCTG	0.01;0.21;0.32;1.26	51566;61275;66051;79192	9.45E-01;7.24E-01;4.10E-01;9.65E-03	442;13583;18359;28068	1.81E+00;1.66E+00;1.42E+00;9.20E-01
	Pcdhga5	0.449546	1.52013	4	ATGGAGACATAGGATGACAC;ACAGTGACCGTTGTTGACCG;CATCCCCATCTCTCGCGAAG;GTTATCGTTTGCATCAAGAA	0.08;0.31;0.4;1.01	54966;65604;68572;78418	1.09E+00;8.98E-01;4.50E-01;2.67E-02	1216;11062;14031;24668	2.04E+00;1.74E+00;1.23E+00;1.07E+00
	Uba2	0.449524	1.21024	4	GCCGGCTTGATAGTGTTGGA;TGTTCCGAATCGTACAGCCA;AGTCCATTTAGCGGAGAAGG;CCAGACACATCCTATTCACG	-0.49;-0.08;0.23;2.13	23863;46346;62180;79594	4.50E-01;3.85E-01;3.79E-01;8.51E-04	40;17454;33287;55772	2.70E+00;7.69E-01;7.55E-01;6.19E-01
	Pwp2	0.449445	1.41846	4	AAGCAAAGACATGTCCACCT;CTTCATCAACGATGATTGCG;CGTGATCTGTGAATTCAGCG;CTTTAACAACCTGACATCCG	-0.67;0.18;0.62;1.67	16005;59979;74214;79539	6.83E-01;6.57E-01;3.87E-01;2.05E-03	95;5420;19655;63629	2.32E+00;1.62E+00;1.34E+00;3.90E-01
	Gm1604b	0.449013	1.62283	4	TGGGGTGGGCTCAACATCCA;TGCGACTCATCCTACCTCTG;CTGTTATCAGACCGCCGAAG;GGAACTATGGAAGAAGATCG	-0.7;0.59;0.63;1.27	14856;73639;74396;79217	1.54E+00;6.69E-01;3.96E-01;9.10E-03	417;5238;5995;64777	2.80E+00;1.69E+00;1.64E+00;3.59E-01
	Atp5a1	0.448291	1.50624	4	TGGTCAGAAGCGGTCCACTG;GCTCCCGCACAGAGATTCGG;ACTGGGCGTGTGTTAAGCAT;CCAACAGCTCCTCGCCAACG	0.14;0.17;0.42;1.06	58034;59605;69351;78636	1.24E+00;6.72E-01;4.67E-01;2.19E-02	998;10283;20029;21600	2.27E+00;1.32E+00;1.32E+00;1.12E+00
	Fam180a	0.448263	1.56659	4	AGCGTATCCCAGATATCCGA;GCTGGTATTCTCCAGCACCC;GCGTCCTGCAGGTGGAGCAG;GCAGATTGAGTGGAAACTCA	0.11;0.15;0.74;0.79	56640;58782;76061;76656	1.16E+00;8.06E-01;6.49E-01;6.62E-02	2978;3573;20852;22994	2.16E+00;1.96E+00;1.28E+00;8.75E-01
	Fmr1nb	0.446528	1.44098	4	AGGTAACAAGAGCTGATACG;CATCATAAGGGACAACCAGG;CTGTTCCGTCCTGTGAACAC;GAAGTCCAGAAGCCAAACCG	-0.03;0.22;0.42;1.18	48970;61888;69241;79034	8.53E-01;7.45E-01;4.65E-01;1.31E-02	600;10395;17747;30664	1.66E+00;1.53E+00;1.46E+00;1.11E+00
	Mettl21a	0.446252	1.40584	4	AGGTGCTCAGGTGACTATCA;TCCAGATCCGTCAGGACTGG;GCAAAAGAGAAGGTGGCGAG;GCCTTAGGTTGGATATGGGG	-0.94;0.33;0.37;2.02	7629;66409;67740;79586	9.39E-01;5.48E-01;4.34E-01;1.03E-03	48;11894;13225;72004	2.62E+00;1.82E+00;1.01E+00;1.75E-01
	Hist1h1d	0.446131	1.37096	4	AGAAGACCGGCGCCGCTGCT;TTCCGGTGAGGCTAAGCCCA;TGTCTTCTCCACAGGTGCAG;TCTTCAGCCCGAGCTTGATG	-0.17;0.16;0.32;1.48	41120;59134;65798;79442	6.59E-01;6.31E-01;4.07E-01;4.17E-03	192;13837;20499;38514	2.02E+00;1.30E+00;1.26E+00;9.08E-01
	Hus1	0.446048	1.48313	4	ACTTACCAGCTCTACAGACA;ACTTACGTCACAGTCTGGGA;TTCTCGGAAGAACCTTTATG;GATTTATTTAGAATTAACGT	-0.14;0.29;0.69;0.95	43029;64734;75290;78003	8.58E-01;7.34E-01;6.78E-01;3.59E-02	1631;4344;14900;36605	1.80E+00;1.67E+00;1.35E+00;1.11E+00
	Larp6	0.444346	1.69394	4	TTGGCGTCATCTCATCGGTG;AGTAGTGCCACGACAAGTGG;AGATAAGAACCATGACGATG;AGTCACCCTGGAGTTGAACG	0.26;0.42;0.46;0.64	63547;69250;70471;74540	1.58E+00;1.11E+00;4.96E-01;1.15E-01	5094;9163;10384;16087	2.78E+00;2.11E+00;1.21E+00;6.78E-01
	Mybl2	0.443969	1.72699	4	TCTTGGCGATCTCAGCCCAG;TCAGGTCGCACCAAGCATCA;AGGCGGTACTCAGTCACACT;GCTGTTACAAGAGTCCAGGA	-1.17;0.46;0.85;1.64	3729;70447;77228;79527	1.20E+00;9.58E-01;7.90E-01;2.31E-03	107;2406;9187;75905	2.29E+00;2.27E+00;2.27E+00;8.33E-02
	P4ha1	0.443806	1.48293	4	TGAAACGTCTGAACACTGAG;TCATGGAAACGGATAATCCG;GGACACAAATACCATCTCAA;GATCCATAATGAGAAAGACC	-0.08;0.11;0.8;0.94	46224;56702;76778;77993	8.91E-01;7.66E-01;5.98E-01;3.62E-02	1641;2856;22932;33410	2.14E+00;1.51E+00;1.17E+00;1.11E+00
	Mndal	0.442792	1.42348	4	TGTCTAGTCCAGCATATTTG;ACCCAGCAGTTCCTTAAACA;AAAGCTTGTACCGTAGCTGA;AAAAAAAAATAAGCTCACCC	-0.14;0.12;0.66;1.12	43063;57107;74930;78859	7.06E-01;6.79E-01;6.07E-01;1.70E-02	775;4704;22527;36571	1.73E+00;1.42E+00;1.35E+00;1.19E+00
	Zfp819	0.442486	1.71995	4	GTTCCATTATCGAGGAACCG;ACGGCATGGAACTCACACAA;AAGTTAAGGACTCGCCGATG;TGAATATACCAAATACGAGA	0.32;0.37;0.49;0.6	65839;67645;71178;73781	1.76E+00;1.01E+00;5.18E-01;1.33E-01	5853;8456;11989;13795	3.05E+00;1.94E+00;1.27E+00;6.31E-01
	Rps7	0.441409	1.72883	4	ATAAGCAGAAGCGCCCCAGA;TCCCAGGAAATCGAAGTTGG;GCACGTGGTCTTCATTGCTC;GCCAAGATCGTGAAGCCCAA	-0.67;-0.48;1.3;1.62	16061;23934;79263;79521	1.74E+00;5.76E-01;3.87E-01;2.45E-03	113;371;55700;63573	3.89E+00;2.25E+00;3.91E-01;3.86E-01
	Olfr569	0.441377	1.6759	4	TAGTTTAATGACTACAGATG;AATTCGGATTATGTATAGGA;GCACATGGCTGTGCTCAAGT;GTTGCTTGGAATCCCAGGGT	0.28;0.35;0.5;0.64	64275;67003;71431;74596	1.64E+00;9.71E-01;5.27E-01;1.14E-01	5038;8203;12630;15359	2.86E+00;1.87E+00;1.29E+00;6.82E-01
	Nipsnap2	0.43907	1.43496	4	TTGTCAGAAAGGTCGATCCA;AGTTCGTATATATTGGGGCC;GTTTATTCATGACCTCCGTG;GTGTTACCAAAGATCCACGA	-0.25;0.37;0.47;1.18	36267;67634;70647;79031	1.01E+00;5.31E-01;5.01E-01;1.32E-02	603;8987;12000;43368	1.93E+00;1.53E+00;1.22E+00;1.06E+00
	Veph1	0.438811	1.42748	4	CCAACCAATCAACAGACACC;TGGTTGAAATCTGTATCACA;GGAGGAATTTCACTGCGATG;GCTGGCTCACCAGGTATCGT	-0.17;-0.06;0.78;1.21	40866;47720;76532;79090	8.59E-01;6.26E-01;4.61E-01;1.19E-02	544;3102;31914;38768	2.08E+00;1.57E+00;1.25E+00;8.12E-01
	Ntrk1	0.438694	1.58879	4	ACCCAGTGTCATGAAGTGTA;GACACAACACCAGTTGTGGT;GCGGAGGCCACTCTTCACGA;ACTAATGAGACCATGCGGCA	-0.04;0.48;0.63;0.68	48589;70999;74385;75277	1.25E+00;8.40E-01;6.68E-01;9.77E-02	4357;5249;8635;31045	2.34E+00;1.64E+00;1.64E+00;7.33E-01
	Ugt1a1	0.437948	1.55109	4	CAGTGGCAAGTGACCCATAG;AGACAAACTCTTGGGCACGT;ACACTAACAGCCTCCCAGCG;ACTTTGTGAAAGATTACCCC	-0.09;0.46;0.63;0.76	45640;70381;74322;76336	1.20E+00;7.49E-01;6.64E-01;7.35E-02	3298;5312;9253;33994	2.26E+00;1.63E+00;1.48E+00;8.36E-01
	Gm6812	0.437574	1.95788	7	AAGGGAGTCTGAGCTCTTGG;TCTCATTCTTCTTCACAGCT;TCTTTCTTCACCTTAACCAA;AAAGTTACAAGAATTTCACA;GAAGTTCAAATATAAAGTCA;TTCTTTCTTCACCTTAACCA;CTTCTTCACAGCTTGGGTGG	-0.32;-0.07;0.28;0.56;0.64;0.77;1.2	32407;47046;64480;73063;74526;76467;79068	1.86E+00;1.61E+00;1.21E+00;1.08E+00;9.07E-01;6.61E-01;2.16E-02	566;3167;5108;6571;15154;32586;47227	2.90E+00;2.46E+00;2.15E+00;1.71E+00;1.59E+00;1.57E+00;1.32E+00
	Fmo4	0.437343	1.42875	4	CACTAGTGACCTGTAAACCC;GATAGTCCCAGAATTTCTCA;TTATAAACTGGACTCACGAG;GTTGCTCTCTCCAAATTTGG	-0.33;0.27;0.68;1.13	32108;63906;75218;78869	8.22E-01;7.28E-01;4.65E-01;1.67E-02	765;4416;15728;47526	1.78E+00;1.61E+00;1.43E+00;8.97E-01
	Pcsk6	0.43669	1.47205	4	GTTGCTGGCGTCATATCTCG;GGCCACGCATACGTGCTGGG;CTGATAAGAACAGTCGCTGT;GGAAAGACAGTAGATGGACC	-0.43;-0.16;0.96;1.37	26904;41705;78096;79356	1.14E+00;4.28E-01;4.06E-01;6.05E-03	278;1538;37929;52731	2.67E+00;1.86E+00;7.16E-01;6.45E-01
	Bcl9l	0.436333	1.38709	4	TGGCACCCCGGAGTAAACGG;ACATAGACGAACTGTGACGG;GAAGACTTGCCCCCTATTGG;GGTGACTTGAGAGGTCCCGG	-0.24;0.28;0.4;1.3	37176;64390;68801;79258	8.42E-01;5.48E-01;4.55E-01;8.20E-03	376;10833;15244;42458	1.73E+00;1.64E+00;1.09E+00;1.08E+00
	1700020N15Rik	0.436262	1.95264	7	AAGGGAGTCTGAGCTCTTGG;TCTCATTCTTCTTCACAGCT;TCTTTCTTCACCTTAACCAA;AAAGTTACAAGAATTTCACA;GAAATTCAAATATAAAGTCA;TTCTTTCTTCACCTTAACCA;CTTCTTCACAGCTTGGGTGG	-0.32;-0.07;0.28;0.56;0.63;0.77;1.2	32407;47046;64480;73063;74365;76467;79068	1.86E+00;1.61E+00;1.19E+00;1.08E+00;9.07E-01;6.61E-01;2.16E-02	566;3167;5269;6571;15154;32586;47227	2.90E+00;2.46E+00;2.11E+00;1.71E+00;1.59E+00;1.57E+00;1.32E+00
	Metrn	0.434619	1.48731	4	GCTGATGTCGCGGTGTGGTG;TTCCGAGTAGCCAGCGTGAG;GTCTTCGCTGAACGTATGAC;GGGGAGACATTTCTGCACGT	-0.02;0.38;0.47;0.92	49536;67925;70650;77832	1.03E+00;8.72E-01;5.02E-01;3.97E-02	1802;8984;11709;30098	1.96E+00;1.69E+00;1.22E+00;1.07E+00
	Ap3s1	0.434262	1.71196	4	TTGTCATTTAGATTAATTGG;TGTTGCGTGTCTTCACTCTG;CTTGCAGAAATGGTGATGGG;TTTAATATTCCATGTAGACA	0.24;0.46;0.52;0.52	62612;70533;71965;72013	1.51E+00;1.21E+00;5.46E-01;1.75E-01	7621;7669;9101;17022	2.68E+00;2.28E+00;1.34E+00;5.48E-01
	Extl1	0.434234	1.22138	4	CTCCCCAGCCAGGATCGTAG;CGGTCGGAAGATGTCCGAGG;AGGTGGCAGATCGGTGACCA;AGTTATCCATACCACCCTAG	-0.28;-0.22;0.16;2.07	35073;38322;58803;79590	5.11E-01;4.27E-01;3.75E-01;9.38E-04	44;20831;41312;44561	2.66E+00;1.01E+00;6.50E-01;5.71E-01
	Mal2	0.433842	1.49535	4	AGTACGTCCTTAGGATGTCG;GGCGCCGGGAAGGACACGGC;AAATGGTAGACAAAATCCTA;TCTGAGTCACCATACCAGAG	0.14;0.18;0.48;0.93	58134;60233;71145;77877	1.24E+00;6.91E-01;5.17E-01;3.87E-02	1757;8488;19401;21500	2.27E+00;1.36E+00;1.26E+00;1.08E+00
	Tchhl1	0.4332	1.60154	4	GGATGATACTAAACTATCTG;GTTTCAGAAACATCTAGTAG;GGGTCTTAATGTCTTCACAT;TAAGTGACCATATGATTCAG	0.14;0.42;0.5;0.68	57881;69452;71432;75163	1.23E+00;1.13E+00;5.27E-01;1.00E-01	4471;8202;10182;21753	2.25E+00;2.14E+00;1.29E+00;7.24E-01
	Ric8b	0.4331	1.49852	4	CAATTGCGCTATGAGCTCCA;ATACAATGGCATGAATATGG;TCAATGATTCCACAATAACT;GACCTACAATTAGTAAACAA	0.05;0.09;0.75;0.85	53495;55688;76156;77240	1.02E+00;8.16E-01;5.76E-01;5.30E-02	2394;3478;23946;26139	1.98E+00;1.94E+00;1.12E+00;9.60E-01
	Olfr658	0.432148	1.56472	4	TCTGTAGCCAAGTTGTCCTG;AAGCGCCTACCCTACTGTCG;AGAATGGTGGAGTAACGCAG;TCTTCATCCATACCTTCACG	0.23;0.27;0.38;0.85	62426;63995;67942;77227	1.50E+00;8.26E-01;4.38E-01;5.33E-02	2407;11692;15639;17208	2.66E+00;1.61E+00;1.03E+00;9.58E-01
	Sytl4	0.430846	1.35712	4	CCTTCTAGGAAATTCCACCA;TCATTCAAGAACAACAACAG;ACACATAGAACAGACCATGG;GGTTCAAATGTATACCCGAA	-0.05;-0.03;0.35;1.46	47879;49188;66983;79434	8.17E-01;4.75E-01;4.22E-01;4.35E-03	200;12649;30446;31755	2.00E+00;1.60E+00;9.70E-01;8.60E-01
	Pigs	0.428892	1.40652	4	ACCATAATGCCACCCCAGCG;GGGCGACCTGGACTATGCGA;CTACCTAAGCTGGACTTGAG;GATCTCTCGCTCATGCACAA	-0.4;-0.4;0.75;1.76	28150;28309;76238;79563	8.25E-01;5.02E-01;4.18E-01;1.53E-03	71;3396;51325;51484	2.45E+00;2.00E+00;7.58E-01;4.19E-01
	Prkd2	0.428687	1.55604	4	TTTGTGGGCGAAACCCCTGG;ACTGTACCACGCGCATCAGG;GCAACTAGCCTGTTCTATCG;GGAAGCCGCTGATTACAGTG	-0.06;0.47;0.61;0.69	47645;70748;74054;75350	1.23E+00;8.09E-01;6.47E-01;9.60E-02	4284;5580;8886;31989	2.31E+00;1.59E+00;1.58E+00;7.39E-01
	Epha10	0.428305	1.53007	4	GCTTCACGCAGGGTGACCTG;GACTGCACTGCCAAGCACTG;GCGATGGTGTCAATCTTGCG;CAGACAGGCTGGATCAGCCG	0.17;0.28;0.45;0.82	59606;64137;70142;76973	1.32E+00;8.32E-01;4.87E-01;5.90E-02	2661;9492;15497;20028	2.40E+00;1.62E+00;1.18E+00;9.18E-01
	Supt5	0.428282	1.89611	4	GCTGGATGAAGACCGCTCTG;AGTTCAAGCGGCCTCCACAG;ACGATGACACCCACAGTACG;GATGACCGATGTACTCAAGG	-1.21;0.75;0.79;1.38	3197;76250;76665;79362	2.00E+00;8.76E-01;8.48E-01;5.92E-03	272;2968;3384;76436	3.53E+00;2.11E+00;1.87E+00;7.12E-02
	Tenm1	0.427022	1.50414	4	AATTACATAGGCTAGTAACA;ACCATCTGGACTCACCCGAT;GACATTGACTCCCACAAGCG;TCATCGCCGAAACAGACGAG	0.11;0.33;0.34;0.92	56768;66430;66704;77846	1.17E+00;9.40E-01;4.18E-01;3.94E-02	1788;12930;13204;22866	2.17E+00;1.82E+00;1.08E+00;9.55E-01
	Rtp3	0.426174	1.42962	4	ATGAGGGTCCATTTGTGCCA;TAGGGAACACCAGTCTCGAA;GTACCTCCCTTACCTAGCAA;TTGAGGTACAGCTAATCTTG	-0.15;-0.01;0.83;1.04	42045;50396;77089;78522	9.36E-01;6.53E-01;4.90E-01;2.44E-02	1112;2545;29238;37590	2.24E+00;1.30E+00;1.27E+00;9.02E-01
	Them6	0.426024	1.63838	4	GAGGTACACACGCGACTGCA;GCTGCGCACCTGACCCGCTG;GCGCGACCTGAACGCGCACA;GCTGCTCCGCCAATAAGTCG	0.18;0.43;0.51;0.58	60098;69764;71837;73331	1.35E+00;1.15E+00;5.41E-01;1.43E-01	6304;7797;9870;19536	2.44E+00;2.18E+00;1.33E+00;6.07E-01
	Olfr862	0.425741	1.5095	4	CAGCCTACTACTGACTGTGA;GTATGCAGCCTGCCTAACTC;CCTGTTACTTGGTCTCTCAG;TGAGGACCAAACGTCTACAC	0.13;0.3;0.44;0.83	57525;65216;69950;77091	1.21E+00;8.80E-01;4.82E-01;5.64E-02	2543;9684;14418;22109	2.23E+00;1.71E+00;1.16E+00;9.36E-01
	Cdc25b	0.425609	1.52795	4	AGATGACAGGGAGCACTCAG;GCAGACAGGCCTTTACCCAG;GTGCATGGTCTGTGTAAGAG;GCGACTTTGAGCGAAAGACA	-0.05;0.48;0.5;0.77	48152;71073;71473;76473	1.26E+00;8.26E-01;5.28E-01;7.03E-02	3161;8161;8561;31482	2.35E+00;1.61E+00;1.29E+00;8.52E-01
	Sgtb	0.425273	1.39021	4	GAAAGAAGAAAATTACGCTG;TAAAAACGGTCTCCAAACAC;GGCCGTTACAAGCTACCAGA;GCTTTCAAACTCAGTGCCCG	-0.18;0.32;0.37;1.19	40252;65919;67706;79066	9.14E-01;6.12E-01;4.34E-01;1.24E-02	568;11928;13715;39382	1.77E+00;1.55E+00;1.22E+00;1.01E+00
	Angptl1	0.424443	1.418	4	TGGCTGTTAGGACTGTGTCG;GGACGGGAACATTGTAAACG;GTTATTGACAAGATCCGTCA;TCTTTCCCATCAGTAGCACG	-0.03;0.13;0.64;0.96	48952;57547;74498;78122	8.52E-01;6.75E-01;6.18E-01;3.33E-02	1512;5136;22087;30682	1.66E+00;1.66E+00;1.21E+00;1.14E+00
	Daxx	0.424442	1.4891	4	GGAGACATCAGACCACCCTG;CAAGGACTCGCGGTTCCCGG;GCGGGCCTCCTGCAAATACG;TCAGCACATCTCCATAATCG	-0.45;0.5;0.61;1.04	25858;71437;74005;78545	1.29E+00;6.44E-01;3.98E-01;2.39E-02	1089;5629;8197;53776	2.41E+00;1.59E+00;1.28E+00;6.82E-01
	NO_CURRENT_153	0.424348	1.42693	4	GAATGGAGCGTGAACTCCTG;GAATTGAGCCGCAACTCGGC;GACAATCGACACGCCGCTTC;GACAATGAACATGTTTAACT	-0.09;0.33;0.48;0.98	45522;66359;70954;78235	9.36E-01;7.45E-01;5.11E-01;3.08E-02	1399;8680;13275;34112	1.81E+00;1.47E+00;1.25E+00;1.18E+00
	Tbc1d19	0.423988	1.54749	4	AAGAACCTTTGGTGTACATG;GAGATGGGAACGGATGAGCC;GCTCAGCAGTACATCCGACA;TCACGGGATACGTCTGTACT	0.17;0.28;0.54;0.71	59587;64340;72397;75651	1.32E+00;8.40E-01;5.64E-01;8.91E-02	3983;7237;15294;20047	2.40E+00;1.64E+00;1.39E+00;7.66E-01
	Stab2	0.423047	1.46353	4	GCAGATTCTGGCAAACAACG;AGGTAGGAACAACTTGCGTG;AATGCATCCAAGCTAGCACG;TCCTGCCGCACATTTGCACG	-0.0;0.33;0.5;0.86	50639;66425;71481;77396	9.40E-01;9.11E-01;5.28E-01;4.95E-02	2238;8153;13209;28995	1.82E+00;1.76E+00;1.30E+00;9.86E-01
	Sec62	0.422518	1.08232	4	TGTTTGTAGGAGGAAACTCC;TGGCCAGCAGAAATGAGAGT;AACCCGATGACCCATCATGT;GGACGCTTTATTTACAACCA	-1.17;-0.44;0.32;2.98	3733;26327;65776;79611	7.90E-01;5.32E-01;4.06E-01;4.80E-04	23;13859;53307;75901	2.94E+00;9.07E-01;4.02E-01;8.34E-02
	Lrwd1	0.422492	1.42333	4	CTGTACCAACAACCAGCTCG;GATGATCCGTTTGTCGTAGG;GCTTCGTAAGGTGAATGGCA;CCAGGTGCGGATGATCGCCG	-0.19;-0.06;0.86;1.09	39596;47153;77388;78732	9.85E-01;5.97E-01;4.56E-01;1.98E-02	902;2246;32481;40038	2.35E+00;1.36E+00;1.19E+00;7.94E-01
	Polr2i	0.422341	1.51386	4	CCCGACGGGACGTACGAGCC;AAATCGCATTCTGCTGTACG;TAACATGCTGTACCCCAAGG;CCTCCGTCCGGGGCAACGTG	-0.45;-0.23;1.08;1.3	25489;37391;78701;79265	1.34E+00;4.29E-01;3.95E-01;8.05E-03	369;933;42243;54145	3.09E+00;1.74E+00;6.70E-01;5.52E-01
	9830107B12Rik	0.422266	1.58041	4	CGGCACCTTTGCTGACCAAG;ACTCATCCTGAGCTTACTCA;AGAGTTACTTCGAGTACTGG;AGTTGAACTTAGAAGACTGT	-0.68;0.38;0.98;1.01	15472;67945;78230;78419	1.18E+00;1.03E+00;3.91E-01;2.67E-02	1215;1404;11689;64163	2.75E+00;1.97E+00;1.23E+00;3.75E-01
	Vmn1r54	0.421814	1.40519	4	GATTGAGAGTGACAGCCTGG;TACAAAGATGACATCCCTGG;ACATCTTCAAGTACATTCGT;GCAGTTATATATGTTGCAAG	0.02;0.19;0.29;1.18	52088;60691;64669;79040	9.65E-01;7.05E-01;3.95E-01;1.30E-02	594;14965;18943;27546	1.84E+00;1.53E+00;1.39E+00;8.55E-01
	BC061237	0.421169	1.71352	6	AGAACGAGAAAAGAATCAAG;AATGCCCCAGGACATCAGTG;ATGTCTCAAAGTTGATCCTG;TGAGCTTAGATTCAATCAGG;GGGAATCCTGGCCAAGTACA;GCTTGAGATGCAACATAACC	-0.88;-0.52;0.18;0.6;1.27;1.87	9242;22227;59881;73875;79215;79577	1.51E+00;1.24E+00;8.87E-01;5.01E-01;4.25E-01;1.83E-03	57;419;5759;19753;57408;70393	3.39E+00;2.37E+00;2.22E+00;1.49E+00;4.87E-01;3.21E-01
	Amy1	0.421066	1.3934	4	GGGCAAAGTTATGCGCAAGT;TCCACAGCCCTTCAAGACCA;GAAAGATTATGTTCGAACCA;CATTAACCACATGTGTGGAG	-0.23;0.23;0.67;1.02	37407;62046;75030;78458	7.50E-01;7.14E-01;5.53E-01;2.58E-02	1176;4604;17588;42227	1.75E+00;1.47E+00;1.25E+00;1.10E+00
	Flt1	0.420891	1.62007	4	TCTATTGTAGGCAAATCGCT;AGTGATGGAGTAATCTTGAG;CCTCGTATTGAGCTCCGTGG;CTTACCATACACATGCACGG	-0.58;0.64;0.73;0.89	19517;74632;75955;77608	1.68E+00;7.95E-01;3.75E-01;4.47E-02	2026;3679;5002;60117	3.03E+00;1.93E+00;1.03E+00;4.88E-01
	Marveld1	0.420718	1.40352	4	CGTGATGAAGTAGAGCCCCA;CTGCAGCGGGCTTTCCTGCG;GCTGGCGGCTGCTCTCTACG;GCGCTGGCTCGTGGTCAACG	-0.23;0.39;0.39;1.14	37486;68259;68268;78928	1.05E+00;5.54E-01;4.44E-01;1.54E-02	706;11366;11375;42148	2.00E+00;1.46E+00;1.11E+00;1.05E+00
	Cep350	0.420424	1.43075	4	ACACCTACTTCTCGTCCATG;AGTGCGCCAGCTGTCCGACG;ACAAGAGTCATGATTACCGG;AATTCTCAGTCGTTCCAGCG	-0.69;0.29;0.68;1.39	15415;64699;75245;79376	8.56E-01;7.31E-01;3.91E-01;5.62E-03	258;4388;14935;64219	1.89E+00;1.79E+00;1.67E+00;3.74E-01
	Slc12a9	0.419078	1.42621	4	AAACACGACTATGCTAAACA;GCCATGCCGGTGTGGCACGG;TAGATGCCGATCAACACGAG;GCTCTTCTCACCGCACGAGG	-0.01;0.08;0.69;0.92	50274;55102;75366;77809	8.98E-01;7.41E-01;5.64E-01;4.03E-02	1825;4268;24532;29360	1.81E+00;1.73E+00;1.09E+00;1.07E+00
	NO_CURRENT_131	0.418036	1.48269	4	CGTTAATCCACCGTATGGGC;CGTTAATAAACGCGGTTTCA;CGTTACGTTTCTTGCCAGGA;CGTTAGACCGAATCTCCGGG	-0.03;0.41;0.49;0.8	49162;69094;71298;76766	1.10E+00;8.59E-01;5.22E-01;6.37E-02	2868;8336;10540;30471	2.09E+00;1.67E+00;1.28E+00;8.89E-01
	Rpp40	0.417992	1.49767	4	TTTCTGCCAGAATACCGAGA;ATACAATACAAGTATTGATG;GCTTATGGCGAGACTTATCG;AATGGATTTATCCCTTAACC	0.18;0.22;0.46;0.82	59852;61620;70403;77018	1.34E+00;7.36E-01;4.94E-01;5.80E-02	2616;9231;18014;19782	2.42E+00;1.45E+00;1.20E+00;9.25E-01
	Clk1	0.417655	1.42607	4	TTCGCAGCACCATTCACACG;ATACTTACAAAGTACTATGG;ACTACATGGGCTACGAGCCA;CTGATATGATCCATTCGAAA	-0.03;0.27;0.55;0.88	49083;63784;72740;77560	8.56E-01;8.17E-01;5.79E-01;4.58E-02	2074;6894;15850;30551	1.66E+00;1.60E+00;1.43E+00;1.02E+00
	Ubb	0.41764	1.42644	4	TCTGCATGCCACCCCTCAGA;CAAGACCATCACCCTAGAGG;GACTGGCAAGACCATCACCC;CTCTGATTACAACATCCAGA	0.12;0.15;0.25;1.16	56860;58488;62918;78972	1.18E+00;6.42E-01;3.83E-01;1.45E-02	662;16716;21146;22774	2.17E+00;1.49E+00;1.26E+00;7.82E-01
	Bpifb5	0.417596	1.41443	4	CCTGGAGGGTATGATCAGGA;AGAACATACGAATTGGAGTA;GGGAGCCATCCTGATGCGAG;GCTGTCACTTAGAATTTGCA	-0.16;0.38;0.46;0.99	41782;67914;70497;78293	1.02E+00;6.47E-01;4.97E-01;2.95E-02	1341;9137;11720;37852	1.96E+00;1.29E+00;1.21E+00;1.19E+00
	Olfr742	0.416987	1.38359	4	AGGTGCCCAGTCATGAGAGA;CTTGGTGTCTGAAAGGAAGT;CAATGAAGAAGGTCACAAAG;GACATACCAGATCTCCAGGA	0.0;0.17;0.3;1.19	51144;59619;65191;79057	9.29E-01;6.73E-01;4.00E-01;1.26E-02	577;14443;20016;28490	1.79E+00;1.55E+00;1.32E+00;8.79E-01
	Il2ra	0.415802	1.45247	4	GAGAGGTTTCCGAAGACTAA;GTGTCTGTATGACCCACCCG;GAATCTTCATGTTTCCAAGG;ATCTTGCAGATGCTAATAGC	-0.21;-0.12;0.97;1.02	38639;44215;78154;78456	1.15E+00;5.77E-01;4.37E-01;2.59E-02	1178;1480;35419;40995	2.70E+00;1.25E+00;1.15E+00;7.09E-01
	Zc3h6	0.415664	1.51363	4	GACCAGGAGGTCCTACACAA;GCCTCATAGAGCATCAAGCA;GGTAACTATAGTAACCAGGA;GCCTTGCATGGACTCAGAGT	-0.11;0.48;0.58;0.71	44625;71064;73385;75715	1.26E+00;7.20E-01;6.10E-01;8.76E-02	3919;6249;8570;35010	2.35E+00;1.50E+00;1.43E+00;7.72E-01
	Miox	0.415289	1.39019	4	CGTGCAAAAGTCCGACCAGG;CCTGGTCTATCGACCCGATG;AGTTGGGGAAATCTACGTCT;ATTTCAGTGTACCTGTATCG	-0.45;0.13;0.8;1.18	25572;57685;76739;79044	8.86E-01;6.21E-01;3.96E-01;1.29E-02	590;2895;21949;54061	2.13E+00;1.54E+00;1.22E+00;6.73E-01
	Rpl27	0.414923	1.50157	4	CTGTTAACCCAGGTACTCTG;CTCGTCTAGAACATTGACGA;GTCCGGAGTAGCGTCCGGCC;CTGTCACTTTCCGGGGATAG	-0.05;0.42;0.58;0.71	48079;69355;73432;75624	1.12E+00;8.23E-01;6.12E-01;8.97E-02	4010;6202;10279;31555	2.13E+00;1.61E+00;1.51E+00;7.63E-01
	Ly9	0.413663	1.33846	4	CGAGTGGCCCGAAATTCCAA;TGCAGGTATAGGGTAGGTCG;ACAGATTCCACGATGATCTG;GAAACAATGTGACATACACA	-0.11;0.17;0.34;1.25	44425;59635;66800;79183	7.15E-01;6.73E-01;4.20E-01;9.84E-03	451;12834;19999;35209	1.65E+00;1.42E+00;1.32E+00;9.60E-01
	Calcoco1	0.413584	1.37072	4	ACTACACCGCAGCCGACTGG;TGAATTACAAACGGTCCGAG;CGTGTGATAATCTCGAACGC;TAAGATCCTGAAGCTGAGTG	-0.05;0.23;0.35;1.13	47848;62155;66876;78894	8.16E-01;7.54E-01;4.21E-01;1.62E-02	740;12758;17479;31786	1.60E+00;1.48E+00;1.44E+00;9.64E-01
	Eif5b	0.413269	1.60196	4	GAAGAGTCCTGATTCTGATG;TCCGTTCCTACCGTAGACAG;GACTGCCAGACCTAACTCAG;CGTACGACAAAGCGAAACGG	0.23;0.37;0.44;0.61	62350;67798;69833;74047	1.49E+00;1.02E+00;4.79E-01;1.26E-01	5586;9801;11835;17284	2.65E+00;1.95E+00;1.16E+00;6.47E-01
	Ces1a	0.413103	1.43671	4	CCCTGCAAGGCAAAGTCATG;TTTGCTTGTCAGGTCTGTAG;TGTGGTGGAGCAAACCTCAG;GCTCGCAAATTACAGGAGTG	0.05;0.3;0.35;0.95	53647;65148;67025;78042	1.03E+00;8.77E-01;4.23E-01;3.51E-02	1592;12609;14486;25987	1.95E+00;1.71E+00;1.12E+00;9.72E-01
	Rmnd1	0.412732	1.63119	4	GAAGTGACAAGCCTGCCTAG;GGACAATCAAAACTGCACAG;CGGGTCCGGGATGCTTTCAG;GAAAGTACAACATGCCACAA	0.22;0.39;0.51;0.52	61970;68517;71832;72082	1.47E+00;1.06E+00;5.41E-01;1.73E-01	7552;7802;11117;17664	2.62E+00;2.03E+00;1.33E+00;5.51E-01
	Anxa1	0.412227	1.41746	4	CAAGCTGTAAAATCATACAA;GTGCAAGGCAGCAACATCCG;GTACTTACAGGAGAATGGAA;GCTCCTGCTGGTCAGAATTG	-0.35;-0.02;0.94;1.08	31210;49414;77937;78723	1.10E+00;4.78E-01;4.53E-01;2.00E-02	911;1697;30220;48424	2.58E+00;1.35E+00;8.68E-01;8.64E-01
	Smok2b	0.411	1.48659	4	AGGGGCATCTGTTCTTCACA;AGCTCTACAGACAGTCTAGA;TCGGAACCCAAGTGAAGCCA;TGATTCGAAAGAGTGAGTGT	0.12;0.23;0.58;0.72	56948;62081;73416;75816	1.18E+00;7.52E-01;6.11E-01;8.53E-02	3818;6218;17553;22686	2.18E+00;1.51E+00;1.48E+00;7.81E-01
	Atoh7	0.410633	1.41887	4	CAAGTACGAGACACTGCAGA;TCGGCTGCGCCCGCGCACGG;CCGTGTTCAGCCCCTGCATG;GGCGTTCGACCGGCTGCGCA	-0.22;-0.12;0.91;1.07	38109;44075;77767;78683	1.06E+00;5.66E-01;4.36E-01;2.08E-02	951;1867;35559;41525	2.50E+00;1.34E+00;1.13E+00;7.05E-01
	Spint4	0.410203	1.31233	4	CTGGAGGACTGAGTGAGCAG;ACAAAAACCCTCCGCTGCCG;GGCTCCACATCCAACAGACA;CAGTACTGAGCGGTGTTGAG	-0.24;0.22;0.26;1.41	36908;61589;63307;79396	7.35E-01;5.43E-01;3.85E-01;5.18E-03	238;16327;18045;42725	1.93E+00;1.44E+00;1.08E+00;7.98E-01
	2019-09-06	0.410021	1.39601	4	AACAACAGCAAACGGCAGGT;TTCAAACTTGGTGTTAAACA;CCGCTATGCAGTTGAAAACG;CTTAAGCGAATGTCCTGTCG	-0.17;-0.02;0.83;1.0	40930;49532;77110;78348	9.39E-01;6.27E-01;4.79E-01;2.83E-02	1286;2524;30101;38704	2.25E+00;1.25E+00;1.21E+00;8.72E-01
	BC017643	0.4092	1.43321	4	CCCACGTCTTACCTTGATCG;TTTCAACAAGAACACTGGGA;AAAGGTCCGTTACTTTGGGA;GGAAGCCTTACCGACCAGCA	-0.42;0.37;0.73;0.96	27331;67699;75949;78063	1.01E+00;7.94E-01;4.10E-01;3.46E-02	1571;3685;11935;52303	1.94E+00;1.93E+00;1.13E+00;7.30E-01
	Fis1	0.40897	1.50083	4	GCACGCAATTTGAATATGCC;CTTGAGCCGGTAGTTGCCCA;GGTTCGAAGCAAATACAATG;AGGCTCTAAAGTATGTGCGA	-0.71;0.39;0.8;1.15	14385;68505;76809;78952	1.06E+00;8.95E-01;4.01E-01;1.49E-02	682;2825;11129;65249	2.15E+00;2.03E+00;1.48E+00;3.46E-01
	Ints4	0.408027	1.48198	4	CATGAGGGGTGATGTTAGAG;AGATGTTCAGAAAATTATCG;CAAGGAACTTTACAGTTCGG;TTCTGCAAAGGATTCATCCA	-0.72;0.49;0.55;1.31	14066;71398;72854;79275	1.29E+00;5.84E-01;4.04E-01;7.83E-03	359;6780;8236;65568	2.40E+00;1.75E+00;1.44E+00;3.38E-01
	Cacng6	0.407062	1.48057	4	AGGTGTGCATCAAGCGACTG;ACTTCAAATTCTTCACCACG;GCTGTTCTTGGGCACGACGC;GGCTTGACTCCGGAGCGAGA	0.08;0.21;0.65;0.68	55262;61537;74711;75238	1.10E+00;7.33E-01;6.90E-01;9.86E-02	4396;4923;18097;24372	2.06E+00;1.70E+00;1.44E+00;7.30E-01
	Cenpe	0.406695	1.20253	4	TCAGGTGTGCGATTGAAGGA;AGCTGGAGCACAGACACGCG;TACTAGGAAAGAAACTAGCG;GGCAACAACGCTCCTAAGCG	-0.35;-0.04;-0.02;2.04	30746;48766;49573;79588	4.71E-01;4.47E-01;4.39E-01;9.82E-04	46;30059;30869;48885	2.64E+00;8.48E-01;8.46E-01;4.80E-01
	Ccnc	0.405862	1.32708	4	TGGTCTAGTTACCATGCAAG;TCTGTTGAAAGAGCGCCAAA;GTTTCTGGCATCCAAAGTAG;ATTTCAAGAGATTCTATGCT	-0.46;0.15;0.63;1.3	25001;58711;74352;79270	6.66E-01;6.48E-01;3.92E-01;7.94E-03	364;5282;20923;54633	1.74E+00;1.64E+00;1.27E+00;6.55E-01
	Cts7	0.405596	1.32182	4	ATTACAATTTGGATGCCGAG;TTCTCCAATCCAAAGTTGGG;TCTGTGACTGCATGCATAGA;TCAGTATCTTATGGCACCAA	-0.25;-0.14;0.67;1.35	36599;42805;74968;79320	7.09E-01;5.37E-01;4.31E-01;6.84E-03	314;4666;36829;43035	1.81E+00;1.74E+00;1.07E+00;6.72E-01
	Mmaa	0.405411	1.43834	4	AGGACAGAGAGCTTGCCTAG;ACTTGAGTGAAGGAGCCATG;TCAGGCCCTCTCCTACCAGT;CGACCTACTCGAAATGTGAG	0.08;0.31;0.32;0.92	55168;65353;65859;77816	1.10E+00;8.86E-01;4.07E-01;4.01E-02	1818;13775;14281;24466	2.05E+00;1.72E+00;1.07E+00;9.11E-01
	Mrps23	0.40523	1.44376	4	ACTTCAAGTCTACCTGTCAG;TTATATATGTCATACCACAG;AGCTTTCTGACCAGATCCAT;GCTTTGCCGTATCGCAAGCG	-0.17;0.39;0.63;0.77	41259;68410;74368;76452	1.06E+00;6.67E-01;6.35E-01;7.08E-02	3182;5266;11224;38375	2.02E+00;1.64E+00;1.27E+00;8.49E-01
	Ubap1l	0.405204	1.58343	4	GCAGCGACGATGGCTTGTAG;TGCTCAAATCAGAGACCCAG;CCGGCGCCATGCCTCCATTG;ATGGGAGCAAGATCCTCGGA	0.12;0.46;0.5;0.54	56986;70594;71468;72552	1.22E+00;1.18E+00;5.28E-01;1.62E-01	7082;8166;9040;22648	2.29E+00;2.18E+00;1.29E+00;5.70E-01
	Rab32	0.405203	1.40341	4	AGTCCACGCCAATGGTGGCG;GTCATCGGCGAGCTCGGCGT;CTCTCGGGTCTCCGGCGCCG;GGTCACATTTGTTAGCTAGG	0.05;0.26;0.3;1.01	53527;63403;65047;78421	1.02E+00;8.01E-01;3.99E-01;2.66E-02	1213;14587;16231;26107	1.94E+00;1.57E+00;1.24E+00;8.72E-01
	Pmm2	0.405052	1.32212	4	ATTCAATGAAAGTTCCCCTG;AAGACCAAAATTGGAGTGGT;AAAAGTTCGTAGCAGACCTG;GCTTGGTAGCGTACAAAGAT	-0.16;0.1;0.55;1.13	41421;56190;72807;78885	6.38E-01;5.87E-01;5.82E-01;1.64E-02	749;6827;23444;38213	1.44E+00;1.43E+00;1.28E+00;1.14E+00
	Tpst2	0.404565	1.32411	4	GCCGCATGGCCAGCACACGA;TGCCATAGCGGTACTCCACG;CTGTGCGTACATCACCTCGA;GCACTCCATGATCACGCGCA	-0.29;0.3;0.33;1.28	34384;64918;66351;79223	8.66E-01;4.99E-01;4.13E-01;8.97E-03	411;13283;14716;45250	1.69E+00;1.69E+00;9.82E-01;9.36E-01
	Olfr935	0.40438	1.88809	5	TAATGACAGTAGATTGGCAG;AGAGCTTAAGGATAGAAATA;GGTAGATTCCAAGAAAGAGG;TATTTCAGAATGTTACATGC;AAACTCCTAAAACAATTGAA	-0.98;0.48;0.73;0.76;1.03	6895;71086;75902;76339;78480	2.01E+00;1.72E+00;7.58E-01;5.21E-01;3.17E-02	1154;3295;3732;8548;72739	3.23E+00;3.03E+00;1.82E+00;1.17E+00;1.97E-01
	Rgsl1	0.4038	1.45584	4	CAAAATCCAACTCCACATGG;GCTACAGAGAACCTGCGGCA;GCCAACGAGGAAGCATGCCA;AGTTTCCTTAAGTCCCCGGA	-0.41;0.48;0.66;0.88	27916;70927;74892;77557	1.24E+00;7.03E-01;4.16E-01;4.59E-02	2077;4742;8707;51718	2.33E+00;1.73E+00;1.02E+00;7.50E-01
	Rpa3	0.403386	1.30614	4	GTTCAATGTTTAGCTTGACG;TGGCGTTGACGCGCGCTTTG;ACCGGCCCGTGTGCTTCGTG;ACGGGCCGGTCGATATACTG	-0.5;-0.45;0.63;1.93	23216;25665;74453;79581	6.72E-01;5.43E-01;3.82E-01;1.13E-03	53;5181;53969;56418	2.58E+00;1.65E+00;5.99E-01;3.97E-01
	Usp37	0.403354	1.29277	4	AGAGAATCTTGGATTGAACG;GAAGCGATACAGCTTCAATG;AGGTGTAACCAGGATTACGC;AGGATTATTAGAAAACCGGT	-0.16;0.06;0.07;1.65	41598;54000;54669;79531	6.43E-01;5.44E-01;3.92E-01;2.23E-03	103;24965;25634;38036	2.29E+00;1.28E+00;1.04E+00;5.56E-01
	Iqsec2	0.402509	1.36364	4	CTGGGTCATCCAAGTACAGG;GCAGGTGAGAACTCTGATGG;ATCCAGTATTTGATCGAACG;GCTTGCCCTCGAAGTATGCA	-0.07;0.28;0.36;1.04	46918;64289;67372;78547	8.38E-01;7.87E-01;4.28E-01;2.39E-02	1087;12262;15345;32716	1.64E+00;1.55E+00;1.28E+00;9.92E-01
	Cxadr	0.401741	1.43797	4	AACTACTATCCGGATCTGAA;ACTCTCAGTCCCGAAGACCA;GCATCACTACACCCGAACAG;ACGCTAGCCTCCAACCGAGC	0.07;0.26;0.5;0.78	54464;63693;71539;76535	1.06E+00;8.13E-01;5.31E-01;6.89E-02	3099;8095;15941;25170	2.00E+00;1.59E+00;1.30E+00;8.60E-01
	Cmpk2	0.401674	1.22736	4	AGTCGCGCCGAGTGTCCGGG;TCGGCCGCGGCGCTTCACTG;AGTTGACCAGTGCCCAAAGG;GGTGTTCCAAGACCGGGACG	-0.29;-0.04;0.05;1.89	34127;48696;53462;79579	4.95E-01;4.70E-01;4.00E-01;1.18E-03	55;26172;30939;45507	2.56E+00;9.72E-01;8.43E-01;5.34E-01
	Klhl14	0.401469	1.67869	4	TGGATCCAACTATTAAATCG;GACCCGCTCTACCAGCTCCG;GCAGAGCCTGGCCAGCAGGT;TTTCTACCTCTACAACGCAG	-0.68;0.72;0.77;0.79	15735;75858;76514;76621	1.91E+00;8.57E-01;3.89E-01;6.70E-02	3013;3120;3776;63899	3.39E+00;2.07E+00;8.70E-01;3.82E-01
	Tmem258	0.401405	1.48206	4	AGGAGCTCGAAGCCATGAGT;AGAAGTACCACAGTCAGGTG;AGCAGTCCTACCTAGTTACG;GGCAGTGAAGAACATGCCGA	0.06;0.38;0.47;0.7	54079;67975;70786;75487	1.05E+00;1.03E+00;5.06E-01;9.29E-02	4147;8848;11659;25555	1.97E+00;1.97E+00;1.23E+00;7.51E-01
	Lnpep	0.401196	1.38321	4	TGCAGTGGTGGAATGACCTG;ATATTGGAATATGCCAAAGG;TGTGAAAATGAGCACATACC;TCCTGTTAGAAGAGGTTCCG	-0.17;0.23;0.69;0.85	41007;62396;75377;77270	7.63E-01;7.42E-01;6.29E-01;5.23E-02	2364;4257;17238;38627	1.81E+00;1.50E+00;1.26E+00;9.65E-01
	Slc37a4	0.400771	1.42091	4	CAGAGCGATCTCATCCACCA;CACAAACTTGCTGATGGCGT;CTACGTTGACCAGACCAACC;TCTTTACTCCGAAGACCACG	-0.15;0.39;0.57;0.8	42297;68346;73102;76769	1.05E+00;6.60E-01;5.96E-01;6.36E-02	2865;6532;11288;37337	2.01E+00;1.47E+00;1.32E+00;8.90E-01
	Sult5a1	0.400662	1.35278	4	TCCTTTGGCGTTCAAGTGGG;AAGGAGATTTGCTCTATCCA;GGTTTGACCACGTGAAGGGG;TCTTCTGTGAGGGTCACTTG	-0.15;-0.09;0.74;1.1	42383;45974;76021;78785	8.02E-01;6.62E-01;4.47E-01;1.86E-02	849;3613;33660;37251	1.95E+00;1.38E+00;1.32E+00;7.58E-01
	Nono	0.400464	1.38479	4	TACTTACGTAGTCAGCAAGA;GCTAGGGTTCGTGTTTCCTG;AGTGGATCGGAACATCAAGG;GTAGTCATTGTGGATGACCG	-0.24;0.18;0.79;0.87	37341;59878;76623;77481	8.71E-01;6.80E-01;5.51E-01;4.76E-02	2153;3011;19756;42294	2.10E+00;1.34E+00;1.10E+00;1.00E+00
	Gprin2	0.39971	1.33739	4	AGTGGAATTTCATCCCACAC;GTTGGTAATGTGTCTACCAT;TAAATCAGCCTGCACGTTGG;GTACATAGTACCCAGACCCG	-0.05;0.2;0.2;1.25	47850;60755;61102;79175	8.16E-01;7.07E-01;3.76E-01;1.00E-02	459;18532;18879;31782	1.64E+00;1.60E+00;1.39E+00;7.18E-01
	E2f7	0.399707	1.45121	4	GAATTGAAGAAGGAAGCATA;GGTATAGGTTCGGAGAACGC;TCTGCGCAGAATGGTCCAAG;CCGGCTTTACTGGAGTAATG	-0.24;-0.22;1.01;1.05	37275;37966;78386;78594	1.22E+00;5.50E-01;4.28E-01;2.28E-02	1040;1248;41668;42360	2.85E+00;1.30E+00;1.10E+00;5.64E-01
	Cd244	0.399505	1.53617	4	AGTGCCCCCACTTACTCGAA;AAAGATACATTTGACCAACT;GTGAGCTACGCTTTGTACAG;CTGCTGGAGATCACCAACAC	0.24;0.28;0.42;0.66	62724;64182;69464;74805	1.52E+00;8.33E-01;4.70E-01;1.09E-01	4829;10170;15452;16910	2.69E+00;1.63E+00;1.13E+00;6.97E-01
	Eef1d	0.399185	1.46909	4	CGAGTATAGTCCTTACCTGG;GAGAACCAGAACCTTCGAGG;CTTCTCTAGAGAGCTCAGCC;GGAGGCTGCCCGACTACGGG	0.14;0.15;0.61;0.69	58078;58467;74106;75433	1.24E+00;6.50E-01;6.41E-01;9.41E-02	4201;5528;21167;21556	2.27E+00;1.60E+00;1.26E+00;7.46E-01
	Zan	0.397839	1.59627	4	GGTAAGACTTGGATCAACAG;GCAGCTGAACAACCAAAGGG;ACTACCGTTACCATGATCAG;GGGAGAGTGTCGCATCTCAG	0.29;0.33;0.41;0.57	64560;66291;68918;73170	1.66E+00;9.33E-01;4.57E-01;1.47E-01	6464;10716;13343;15074	2.89E+00;1.81E+00;1.09E+00;5.99E-01
	Kcnu1	0.397444	1.45049	4	CAAACACGCATACTACAATG;AAGCTCGGATTTATCGCCCA;TTTCTGTTGACATAGAAGCG;TTTCTGCACAGACCGTCGTG	-0.0;0.32;0.59;0.68	50577;66089;73691;75117	9.22E-01;9.09E-01;6.26E-01;1.01E-01	4517;5943;13546;29057	1.79E+00;1.75E+00;1.54E+00;7.20E-01
	NO_CURRENT_101	0.396809	1.5058	4	CCGGCGCTGCGGTCGGCTTG;CCGGATCGGCTACGCTACGG;CCGGGCGCCGTATCCCCTAC;CCGGCTTGAATACCGTGCGG	0.17;0.34;0.37;0.7	59633;66821;67678;75569	1.32E+00;9.61E-01;4.33E-01;9.10E-02	4065;11956;12813;20001	2.40E+00;1.85E+00;1.01E+00;7.58E-01
	Esp6	0.396576	1.34298	4	AGGAAACCCAAGCATCAAAG;TTGGATAAGATTGAATCCAA;TTTGTCTTGATCAAAGGCAC;TAATTTAGACAGATTTAAGG	-0.71;0.32;0.41;1.56	14671;65733;69134;79495	9.05E-01;4.62E-01;3.98E-01;3.01E-03	139;10500;13901;64963	2.16E+00;1.76E+00;1.10E+00;3.54E-01
	Snx32	0.396264	1.39563	4	GTGGGAGTGCATAACACGGT;GCCCTGATATGCCGGTGATG;GGGGGACAGTCCCTTACAGG;GTGGAAAACGAAGAGTACGC	-0.07;0.26;0.61;0.78	46937;63510;74057;76577	8.06E-01;7.87E-01;6.47E-01;6.80E-02	3057;5577;16124;32698	1.59E+00;1.58E+00;1.55E+00;8.65E-01
	Ptpru	0.395431	1.38175	4	ATCGAGTACCGCATGGCACG;TTGTGAGAATCAGACGCACG;GCGAAGCGGTGGTGTCACCG;GGATCCGGTCATATTCCACA	-0.44;0.13;0.88;1.01	26402;57663;77494;78389	1.00E+00;6.21E-01;4.02E-01;2.74E-02	1245;2140;21971;53232	2.39E+00;1.22E+00;1.22E+00;7.00E-01
	3830417A13Rik	0.394752	1.30449	4	TACCCAGGACCCTATAGCTG;ATAGAACCCATGGCAGTGGG;AGGTGTACCCAAGACAGGTC;TTTCTTCAGTTTGGGCCCGA	-0.17;-0.16;0.6;1.31	41283;41810;73729;79277	6.35E-01;6.28E-01;4.28E-01;7.78E-03	357;5904;37824;38351	1.75E+00;1.55E+00;1.27E+00;6.48E-01
	C5ar1	0.394445	1.34826	4	CGAGGGCAGGACTATACAGG;GAACACCAGCAGGAAACGGT;TCCATCCTTCGTGTACCGGG;GCAGTGCCAAGCACGAGAGG	-0.5;0.34;0.54;1.2	23009;66557;72533;79085	9.47E-01;5.69E-01;3.81E-01;1.20E-02	549;7101;13077;56625	1.83E+00;1.57E+00;1.40E+00;5.92E-01
	Mogat1	0.393788	1.40875	4	GCTGTAGCTTGTCAAAACGC;GTCTCAATCATTGTCCTCGG;CGAGAATATCTGATGAGTAA;CTTTACATCGTATCTCCACG	-0.77;0.12;0.84;1.38	12551;56910;77216;79366	9.56E-01;6.03E-01;4.24E-01;5.83E-03	268;2418;22724;67082	2.28E+00;1.88E+00;1.18E+00;2.98E-01
	Cyp3a59	0.393631	1.5979	4	ACGCCTTGCTTCAAAACAGA;ATGGTGCCAAATAAAGGTAG;GGGATTCTGTGGATTATTGA;TTTGGGCCCACATAAAACCT	0.22;0.41;0.46;0.49	61601;69026;70435;71286	1.44E+00;1.10E+00;4.95E-01;1.92E-01	8349;9199;10608;18033	2.58E+00;2.09E+00;1.20E+00;5.22E-01
	Dgat1	0.392904	1.20779	3	AGTGGTTTCAGCAATTATCG;GCTCACCAATAATCACGCAT;AAAGCGCTTTCGTATTCGGG	0.12;0.13;0.93	57061;57565;77893	7.63E-01;3.62E-01;2.88E-02	1741;22069;22573	1.64E+00;1.20E+00;7.78E-01
	Nfatc2	0.392646	1.2677	4	TTGGAGAGTGGCCACTCGAG;CCGCCACATCTACCCTACTG;CTAGCGGGGCTCAAGCAAAG;GATCTTCTCATAGCTCGTGG	-0.28;0.13;0.42;1.3	34601;57689;69408;79266	6.21E-01;5.03E-01;4.68E-01;8.02E-03	368;10226;21944;45033	1.74E+00;1.22E+00;1.12E+00;9.90E-01
	Nrtn	0.391942	1.11237	2	GCTATCTGTCTGGATGTGCC;GCGTGGAGGGCGTCGTAGCG	0.32;0.46	65959;70550	5.46E-01;1.05E-01	9084;13675	1.53E+00;6.94E-01
	Utp4	0.39171	1.22281	4	GAGAGGCCGAATAACCAGGT;TTCACGAACAGATGGCACGG;AAGTCCAGGTGCATAGTGTG;TAAGGAACCAGCTGCGACGT	-0.35;-0.01;0.32;1.61	30749;50451;65777;79517	4.90E-01;4.47E-01;4.06E-01;2.53E-03	117;13857;29183;48886	2.23E+00;9.07E-01;9.04E-01;8.48E-01
	Olfr172	0.391459	1.51206	5	ATTGACATAGGGGTCAACAC;GCAGTCTGCAGTTTCAACAG;ACAAACCACCCTGAAATGAA;TGCATTCTATGGTTCATGTG;GCTCTGCCTTCAGATGATCA	-0.05;0.16;0.34;0.47;1.03	47869;59277;66780;70840;78494	1.12E+00;1.03E+00;8.14E-01;4.61E-01;3.13E-02	1140;8794;12854;20357;31765	2.00E+00;1.80E+00;1.53E+00;1.17E+00;1.07E+00
	Mmp8	0.390179	1.48796	4	AGTTAGATGCAGCTACAATG;GTACCCAAACTATGCTTACA;TGCTACTACCACACTCCGTG;GTCTTCGAGGAATGCCACGA	0.2;0.31;0.31;0.74	60994;65345;65677;76055	1.41E+00;8.86E-01;4.05E-01;7.99E-02	3579;13957;14289;18640	2.52E+00;1.72E+00;9.02E-01;8.05E-01
	Loxl4	0.390162	1.42165	4	AAGTTGCCGACAGGTCACCA;AGGTGCAACATCCCAGACAT;GAGAAGACCCTAGATCAGTG;GCTGTGGAAGTACGGTACGA	-0.74;0.28;0.8;1.23	13343;64250;76731;79129	8.85E-01;8.36E-01;4.13E-01;1.10E-02	505;2903;15384;66291	2.13E+00;1.63E+00;1.60E+00;3.19E-01
	Ctla2b	0.390011	1.37103	4	CACAATGCAGACTATGAGCG;TCCAAACTTGGATCAGGGGA;ATTTGCAAAAGCCTACAGTC;AAGACACAGAAGACTCATGT	0.01;0.26;0.4;0.89	51483;63565;68566;77631	9.42E-01;8.08E-01;4.50E-01;4.42E-02	2003;11068;16068;28151	1.81E+00;1.58E+00;1.07E+00;1.03E+00
	Olfr478	0.389977	1.40638	4	GGTTGCAAATTGCCATGAAG;GACAACAGAACCTAGCTGGA;CTATGTCAGCAAAAGCCAAG;AGTTGCAGGGACACTGACAT	-0.16;0.42;0.51;0.78	41903;69475;71732;76607	1.13E+00;6.50E-01;5.37E-01;6.73E-02	3027;7902;10159;37731	2.14E+00;1.32E+00;1.30E+00;8.68E-01
	Bhlhe41	0.389436	1.4097	4	GTCATCCAGCGGACTCAGCC;CACCCAGCTCCTGACGCCAC;TCCAGCTCTCAAAGCGCGCG;ACTCGTCGCCTGCGCCCAAG	0.08;0.23;0.49;0.76	54975;62131;71409;76320	1.09E+00;7.53E-01;5.26E-01;7.38E-02	3314;8225;17503;24659	2.04E+00;1.48E+00;1.29E+00;8.34E-01
	Olfr114	0.389166	1.41436	5	GAAGTGGCTACATTTCATAT;GGGAACTGTCAACATACTGA;AGGCAAAACCTATTACTGAC;TCATGTGTCCCAGAAAGTGT;TTCTTTACATGGTTTGCCTG	-0.25;-0.06;0.37;0.65;1.24	36240;47132;67882;74741;79153	8.70E-01;6.98E-01;6.23E-01;6.23E-01;1.31E-02	481;4893;11752;32502;43394	1.63E+00;1.53E+00;1.51E+00;1.32E+00;1.09E+00
	Tstd3	0.388857	1.54821	4	TTTCTTCCAGTGGATGAGGT;TAGGAGTAGAACAAAATGCT;CAGGGCGGCCCTAGGATCAG;AGCTCTGCAGATGAACCCAG	0.22;0.32;0.48;0.54	61877;65988;70922;72394	1.46E+00;9.17E-01;5.10E-01;1.66E-01	7240;8712;13646;17757	2.61E+00;1.78E+00;1.24E+00;5.63E-01
	Dysf	0.388207	1.35947	4	TCACCTCAATGGCAGTACGT;AGGTGTTCGAGAACCAGACC;AGCTCCACCACGATGCAGGG;ACAGGCTTAATATTCACCCC	0.01;0.09;0.59;0.86	51596;55592;73593;77358	9.47E-01;6.21E-01;5.74E-01;5.04E-02	2276;6041;24042;28038	1.81E+00;1.53E+00;1.11E+00;9.80E-01
	Edf1	0.388025	1.42049	4	CAAGCTCGACCGGGAGACCG;CTTCTTGCGCAGCACCGTCA;ATCTTAGCGGCTCAGCGACG;TCACGACAGGGTGACCCTGG	-0.12;0.44;0.49;0.74	44150;69892;71227;76138	1.16E+00;7.07E-01;5.20E-01;7.80E-02	3496;8407;9742;35484	2.19E+00;1.40E+00;1.27E+00;8.14E-01
	Hpse	0.387852	1.17332	3	CAAGGGTTATAACATCTCCT;GTCACTAAAGAGATCACACC;AGTTTAACTGTCTTCCCTCG	-0.25;0.49;0.93	36232;71194;77917	5.95E-01;3.92E-01;2.84E-02	1717;8440;43402	1.52E+00;1.21E+00;7.91E-01
	Adra2b	0.38777	1.58505	4	TCTTGGTTGAGCTCACACTG;GACGGCTGCAATGAGCCACA;AGAGGTCTCGGAGCTAAGAG;GGTAGACGAGAATCATGATG	-0.79;0.54;0.89;0.92	11587;72393;77590;77853	1.39E+00;1.02E+00;4.40E-01;3.93E-02	1781;2044;7241;68047	2.56E+00;2.43E+00;1.08E+00;2.73E-01
	Dennd3	0.387254	1.33623	4	GGTCGAGATGACAGCCCATG;ACAGATCCACTTACATGCAG;GGTCTTTGATAAGCACGGCG;GGTCGTCTTTCCCTCTCGAG	-0.01;0.17;0.46;0.93	50089;59658;70563;77878	8.91E-01;6.74E-01;4.99E-01;3.87E-02	1756;9072;19976;29545	1.72E+00;1.33E+00;1.21E+00;1.08E+00
	Dnah10	0.386364	1.382	4	CCTGGCACAGTACTACAAGG;CCTCATTTCGTGTAGCACCG;CAGTGGGTGGCGCATCACGT;GATTCATTAAGAACTCATCG	-0.47;0.45;0.52;1.04	24648;70331;72101;78541	1.19E+00;5.52E-01;3.90E-01;2.40E-02	1092;7533;9303;54986	2.25E+00;1.36E+00;1.28E+00;6.43E-01
	Ncmap	0.386321	1.49718	4	GTCCACCTTACTCTTATACA;GATGATGACAACCACCACAA;GAAGACGGCGTCCCCCAAAG;CTTCTCGCTGAACATGACCA	-0.38;0.57;0.67;0.69	29273;73146;75052;75327	1.47E+00;7.15E-01;4.30E-01;9.66E-02	4307;4582;6488;50361	2.70E+00;1.75E+00;7.96E-01;7.37E-01
	Ctif	0.386065	1.24541	4	GTCCTCCCGACCTGGCAGGT;GACAACTCCCTGGACATGCT;GCTGCTGACCGACAAGACAG;CTTCACCCAGTTCCATCGGA	-0.25;0.12;0.29;1.39	36225;57159;64617;79372	6.09E-01;5.31E-01;3.95E-01;5.70E-03	262;15017;22475;43409	1.89E+00;1.19E+00;1.05E+00;8.52E-01
	Alox12b	0.385398	1.53864	4	TAAAACGTGGGTGCGCTACG;GGATTGCGGCACCGTCGGGG;GTGCGCACTTACCGCCCCCG;TACCTTAATGGTATTAACCC	-0.52;0.64;0.66;0.75	22389;74590;74950;76231	1.68E+00;7.07E-01;3.79E-01;7.58E-02	3403;4684;5044;57245	3.02E+00;1.74E+00;8.24E-01;5.73E-01
	Kpna6	0.385288	1.33235	4	GAGTTTCCGGAATTTCTGCG;TGTGGGTAATATTGTCACTG;CCCAGTTGTAGAGCTCACGT;GGATTACTCACGTTAACAAG	-0.33;0.38;0.42;1.07	32278;68134;69189;78671	1.04E+00;4.67E-01;4.63E-01;2.11E-02	963;10445;11500;47357	1.99E+00;1.33E+00;1.11E+00;9.03E-01
	Slc2a12	0.385259	1.35796	4	AATCCTGATAGGTCTGACAC;TTCCGCAATGTACACACACG;CAAGTTCATAACCCACCAGG;TCTTCTTAACCAGTCCCTGG	-0.11;0.33;0.48;0.85	44431;66226;71023;77249	9.30E-01;7.15E-01;5.13E-01;5.28E-02	2385;8611;13408;35203	1.80E+00;1.42E+00;1.25E+00;9.61E-01
	Eci2	0.385104	1.34697	4	CCATTTACTACCGCAACCAG;AACTGCCAGGCAGAACTATG;AAACTCTTGAAGAAGGACCC;CTGGTGACTACTACTGCAGT	-0.11;-0.02;0.76;0.91	44839;49722;76310;77742	8.33E-01;7.26E-01;4.81E-01;4.18E-02	1892;3324;29912;34795	2.02E+00;1.44E+00;1.05E+00;8.78E-01
	Tmprss5	0.384833	1.48409	4	AGAGAAACAATTCGGCCAGA;GGTGCTGTCCGACAACACCA;ATCTTTCAGAATAAATGGAG;AGAGAGTTGAGCAAACTCCT	0.18;0.33;0.36;0.67	59948;66180;67427;75089	1.34E+00;9.27E-01;4.29E-01;1.02E-01	4545;12207;13454;19686	2.43E+00;1.80E+00;9.95E-01;7.18E-01
	Vbp1	0.384786	1.40571	4	CTGCTTCAGGAATCCCTAAG;AAAGGAGTCTACCAATTCAA;CATAGGCATACTTTATCAGT;AGATACAGTGTTAAAGAAGC	-0.67;0.42;0.6;1.19	16011;69473;73714;79056	1.13E+00;6.27E-01;3.87E-01;1.26E-02	578;5920;10161;63623	2.14E+00;1.55E+00;1.55E+00;3.90E-01
	Snx1	0.384748	1.52089	4	TCTGGGTCCTGTAACATGGT;ACTCTAGTCAACCATAGGAA;TTCTACTCTAGGAATGACAA;GCCACAGCCAAGCTATGAGG	0.25;0.25;0.46;0.58	62887;63200;70525;73388	1.53E+00;7.93E-01;4.98E-01;1.42E-01	6246;9110;16434;16747	2.71E+00;1.55E+00;1.21E+00;6.10E-01
	Dcpp1	0.384699	1.35484	5	ATCTACCCTTAAGAAATACC;CTTACCTTGTGTCAAAACGG;ATTATCTGAGTTAAAGCCGA;AACTATGATGACAACAAGGA;TCCTGCACTAGTGCACCTGA	-0.22;-0.13;0.24;0.57;1.47	37994;43437;62654;73209;79438	7.49E-01;6.55E-01;5.54E-01;5.40E-01;5.32E-03	196;6425;16979;36197;41636	1.91E+00;1.41E+00;1.30E+00;1.22E+00;9.34E-01
	Pnpla2	0.384248	1.33664	4	AGCAGGTGCCAACATTATTG;CCTGTTTGCACATCTCTCGG;TGTTCTTGCAAAGCGCTATG;GGCAGGAGGCCACGCCAATG	-0.29;0.15;0.77;0.91	33996;58346;76476;77805	8.52E-01;6.38E-01;4.93E-01;4.03E-02	1829;3158;21288;45638	2.06E+00;1.25E+00;1.07E+00;9.67E-01
	Ckap4	0.383816	1.39506	4	TCTGTCGGACGGGATCCACG;AGAGGACATCCGGAGACTGG;CCGCAGAACCAGGCGCACCG;CCGCACCTCTGTGTAGACGT	0.07;0.3;0.31;0.86	54431;65258;65531;77314	1.06E+00;8.82E-01;4.04E-01;5.13E-02	2320;14103;14376;25203	2.00E+00;1.71E+00;9.72E-01;8.95E-01
	Twf1	0.383696	1.3964	4	TCCTTTCATAGAGCAACTGG;ACGTCAGAAAATGCTGTATG;GGCATCTCGAGAAATAGGAA;ACGGCAGATTAAAATCAACG	0.03;0.08;0.7;0.73	52404;55250;75464;75927	9.78E-01;7.49E-01;5.67E-01;8.28E-02	3707;4170;24384;27230	1.86E+00;1.83E+00;1.10E+00;7.92E-01
	Nanos1	0.383445	1.34518	4	CCAGCAACCCGGGCTCAGCG;GAGGCTCGGCAGCCCACGCA;GCTCCTGGAACGACTACCTG;GCACGAGCGCCATAGGCGCG	-0.18;-0.01;0.81;0.91	40738;50282;76918;77733	9.10E-01;6.23E-01;4.88E-01;4.20E-02	1901;2716;29352;38897	2.19E+00;1.24E+00;1.05E+00;8.98E-01
	NO_CURRENT_124	0.383317	1.41878	4	CGGTCAGTCGTCTTCCCGGA;CGGTAAGATGGTTATACCGT;CGGTAAGGTCGGTCTCCATC;CGGTACCACGCCCCACCTCG	0.07;0.2;0.59;0.67	54708;61020;73664;74987	1.07E+00;7.16E-01;6.25E-01;1.04E-01	4647;5970;18615;24926	2.02E+00;1.54E+00;1.41E+00;7.10E-01
	Gpihbp1	0.383298	1.31918	4	CACTGTGCAATATTCCACCC;GCAGGTATCAGTACACCACA;CTGTCAAGTGCTTCACAGCG;CCTGCTTCCAGGGATCATGT	-0.02;0.06;0.54;0.95	49798;53956;72554;78047	8.81E-01;5.70E-01;5.43E-01;3.49E-02	1587;7080;25676;29836	1.71E+00;1.40E+00;1.12E+00;1.04E+00
	BC030867	0.383104	1.35191	4	CGTTGAGGTCCAGAAAAACG;AAGAGCTGGCTGAGTAACTG;AAAAATATATCCAGAGTGTG;TCTGAGTGGATCGTTACGGA	-0.04;0.09;0.66;0.81	48735;55863;74886;76926	8.45E-01;7.03E-01;5.80E-01;6.01E-02	2708;4748;23771;30899	1.72E+00;1.64E+00;1.13E+00;9.11E-01
	BC005624	0.382533	1.44247	4	CTTGCGGAAGAGGCCAAATG;TTTCTGCAGAGACCAACCGG;GCGCCGGGCTGACTCGGAGT;CCTTTCCAAATGGCGACAGG	0.04;0.3;0.59;0.6	52842;65087;73693;73818	9.95E-01;8.74E-01;6.26E-01;1.32E-01	5816;5941;14547;26792	1.89E+00;1.70E+00;1.54E+00;6.33E-01
	Dync2h1	0.382442	1.45191	4	TATACATACGAGTACCAGGT;AAGTCCTGGAATATATGTCG;TTCTCTAGACTAGTCCCTCG;TTTATTATTAATCTTATACG	-0.72;0.12;1.02;1.11	14299;57271;78423;78810	1.24E+00;6.11E-01;4.02E-01;1.80E-02	824;1211;22363;65335	2.87E+00;1.40E+00;1.20E+00;3.44E-01
	Map3k8	0.38244	1.39105	4	TCTCTTTATGGAAGCCGGCG;ATCTGTCAGATATGGGACCG;GCCCAGAGGTGATCCTATGT;GGACGTCGACCACAAGAATG	0.0;0.08;0.72;0.73	50825;55231;75845;75883	9.18E-01;7.84E-01;5.67E-01;8.38E-02	3751;3789;24403;28761	1.91E+00;1.77E+00;1.10E+00;7.88E-01
	Atp5c1	0.382341	1.54584	4	GGCTGATATTAAGGCACCTG;TGTCATTCAAAGATGTGGGA;AGAACCTGTCCCATACACTC;CCGATGTGGTCCTACCATTG	-0.8;-0.2;1.2;1.32	11546;39313;79082;79294	1.57E+00;4.41E-01;4.26E-01;7.41E-03	340;552;40321;68088	3.55E+00;1.77E+00;5.91E-01;2.72E-01
	Safb2	0.38195	1.56117	4	GATCAAGATGAACTCACACC;TCTTCAGAGTTCACAAGACA;TTTGGTGGCCTCATCTGACG;AGTTACTTTAAGGTCTGACA	0.2;0.39;0.47;0.48	60867;68253;70696;70896	1.40E+00;1.05E+00;5.03E-01;2.02E-01	8738;8938;11381;18767	2.51E+00;2.00E+00;1.22E+00;5.09E-01
	Ttc3	0.380647	1.3472	4	TAAGGAGCTTGATTCAGGAT;CTCTCCTACACCACTCTGTG;TTGTCGATCACAACAAATCG;GGCCGTACTTCTCATCCCAG	-0.1;0.31;0.47;0.83	45379;65656;70815;77113	9.01E-01;7.41E-01;5.07E-01;5.59E-02	2521;8819;13978;34255	1.75E+00;1.47E+00;1.24E+00;9.39E-01
	Zfp248	0.380378	1.44141	4	AACAGGACAAGGCTTCTGCG;ATCTTGTTGGTGAACATGAG;AAACATCAGATAATACAGAT;AAAGTCATGTGACTATGATG	-0.06;0.44;0.52;0.63	47616;69803;71935;74304	1.15E+00;8.08E-01;5.45E-01;1.20E-01	5330;7699;9831;32018	2.18E+00;1.58E+00;1.34E+00;6.63E-01
	Gtpbp8	0.379754	1.3448	4	GTACTCGATGCGGTTCCGGG;GAAGGTAGTGTACCCGCTGC;GGTGCTCTATAGCCATACCC;CAGCCTTAGCACTTCTGCGA	-0.14;-0.1;0.81;0.95	42766;45236;76921;78016	9.11E-01;6.71E-01;4.42E-01;3.56E-02	1618;2713;34398;36868	2.19E+00;1.34E+00;1.12E+00;7.37E-01
	Usp31	0.37852	1.25626	4	AAGAATGCGTTGCAGTATCG;ATGCCCATTCAGTTTGCGTG;CGAAGAGCTCGGTGTTACTG;AGGTTATTACCTGATCAGTG	-0.32;0.22;0.4;1.21	32482;61628;68862;79103	7.36E-01;4.70E-01;4.56E-01;1.16E-02	531;10772;18006;47152	1.58E+00;1.45E+00;1.09E+00;9.10E-01
	Lilra5	0.378081	1.28603	4	CAATTGAACAACGATCTGGG;TACCGTCTTTATAAAGAGGG;GGGCCAAGAGACCTCCATGT;CAGAGTTTATAAACTCTACG	-0.3;0.09;0.69;1.04	33590;55747;75299;78524	7.35E-01;5.77E-01;4.87E-01;2.44E-02	1110;4335;23886;46044	1.80E+00;1.27E+00;1.12E+00;9.52E-01
	Samd7	0.377911	1.45224	4	AAATACCTGTCCACAATTGG;CAGAAATACCGACTCAGGAG;CAACTTGACCCATAGAAGAG;GCCTTCATAGACCTGTTCAG	0.16;0.23;0.51;0.61	59034;62424;71668;74056	1.29E+00;7.64E-01;5.35E-01;1.26E-01	5578;7966;17210;20600	2.35E+00;1.50E+00;1.31E+00;6.47E-01
	Hbb-bh2	0.376721	1.45362	4	GATGATAGAATCCTTTAGTG;TGCCTTCACCTTAGTCCACG;TTCACTTGCTAGAATACTGA;GATCCATATGAAGCTTGTCA	0.19;0.2;0.5;0.62	60361;60865;71440;74277	1.37E+00;7.11E-01;5.27E-01;1.21E-01	5357;8194;18770;19273	2.46E+00;1.40E+00;1.29E+00;6.61E-01
	Trmt5	0.376659	1.40423	4	ATTCCTCGAACGTCAGAGGG;CAGCAGTAAGCATCCTGTAG;TTTCCTAAGTCTCGGCACCA;AGAGGAAAATATGCTGACCA	-0.27;0.4;0.68;0.69	35559;68780;75280;75311	1.08E+00;7.33E-01;5.19E-01;9.69E-02	4323;4354;10854;44075	2.06E+00;1.80E+00;1.03E+00;7.36E-01
	Stk38	0.376455	1.33735	4	TGTCACGCTCCGCACGAATG;CAGGCCTGAAAAAAGCACAC;GTTACAACAAGCTCTGCGAT;TGTTTCCTTCCGAGCGTGCG	-0.48;0.35;0.61;1.03	23986;67001;74103;78475	9.71E-01;6.50E-01;3.86E-01;2.54E-02	1159;5531;12633;55648	1.87E+00;1.60E+00;1.25E+00;6.23E-01
	Unc5b	0.37619	1.28266	4	CACACCATAGACGATGACTG;GGAGGAACTCTTCGGGCTCG;GCAGGGGCGAATTAGTCATG;CCTGTATCTACATATCAACA	-0.15;0.22;0.43;1.0	42316;61725;69724;78357	7.39E-01;6.60E-01;4.76E-01;2.81E-02	1277;9910;17909;37318	1.45E+00;1.32E+00;1.21E+00;1.15E+00
	Foxs1	0.375828	1.24576	4	ATGGCTATCCAGAGTTCACC;CGTTGAGAGACAGGTTATGG;CAAGAGGTGCCAAACCCCAA;AGACGCTTCACCAAACGCAC	-0.6;0.02;0.57;1.52	18682;51731;73177;79471	5.99E-01;5.07E-01;3.76E-01;3.54E-03	163;6457;27903;60952	2.09E+00;1.48E+00;9.52E-01;4.64E-01
	Unc13c	0.374523	1.30987	4	ACAATACACTTGTTTACACG;ACAGAACTTTCCGAACTCCG;GGTACTTGACTCGTTCGCGG;GCAAACACCTCACTATGTGG	0.02;0.13;0.15;1.21	51761;57389;58546;79088	9.53E-01;6.14E-01;3.76E-01;1.19E-02	546;21088;22245;27873	1.82E+00;1.57E+00;1.20E+00;6.43E-01
	Plod2	0.374061	1.36859	4	TGCTCGCTCTGAAGATTACG;ATGGAATGAACAGTATCGGA;AAACGCTACCTGAATTCTGG;GTGTGATTACTACTTTAGTG	0.01;0.1;0.67;0.71	51518;56173;75058;75695	9.44E-01;7.16E-01;5.87E-01;8.81E-02	3942;4576;23461;28116	1.81E+00;1.75E+00;1.14E+00;7.69E-01
	Ppp1r37	0.37398	1.32088	4	GAGCCACAAAGGGTGCCGAG;GGAGCAAACCAACTTAGATG;TGTCACGTTCCCATCTGACG;GGTCTGGCCTACATCTGCGA	0.08;0.09;0.31;1.03	54968;55389;65384;78477	1.09E+00;5.70E-01;4.02E-01;2.54E-02	1157;14250;24245;24666	2.04E+00;1.25E+00;1.11E+00;8.88E-01
	Pspc1	0.373401	1.21143	4	GTAGCAAAGCGAATTCGGAG;CACCACGGTTTGCTCAACCT;GCTCTCCGTAGCGCTCAAAG;GGTTCTACAATGACTGGACG	-0.28;-0.04;0.4;1.41	34670;48633;68746;79400	5.04E-01;4.70E-01;4.54E-01;5.09E-03	234;10888;31001;44964	1.93E+00;1.08E+00;9.93E-01;8.41E-01
	Olfr480	0.373348	1.37889	4	GGAGTACCCAATGTCTAGAA;GGTAGGAAGTTCCAACTAGG;AAAGGGAACATTTATCCCTG;GAACAAGAAAGCTTCAATAG	-0.15;0.43;0.46;0.75	42245;69753;70479;76204	1.15E+00;6.58E-01;4.97E-01;7.65E-02	3430;9155;9882;37391	2.17E+00;1.31E+00;1.21E+00;8.21E-01
	Bex2	0.373228	1.3925	4	GAATGACCATCAGGAAAAGG;TAGCAAAAGGGATCCGATTG;GGAGACTACTACGTGCCTAG;GCCCATCGTGCACTACAGAT	0.12;0.2;0.47;0.71	56835;60971;70779;75598	1.17E+00;7.14E-01;5.05E-01;9.03E-02	4036;8855;18663;22799	2.17E+00;1.40E+00;1.23E+00;7.61E-01
	Srgap2	0.373058	1.39185	4	AGCAGATGGCAAGGTTGTAG;CAGCTATAGAGTCCATGTCA;GGAATTCAAATTTCATAGGG;TCGATTTGTTCAAGTCAGCG	0.06;0.19;0.59;0.66	53867;60507;73629;74802	1.04E+00;6.99E-01;6.23E-01;1.09E-01	4832;6005;19127;25767	1.96E+00;1.54E+00;1.38E+00;6.96E-01
	Rspry1	0.372704	1.35479	4	AGCTTTACCTCCAAGCCGTG;GTGGTACTATGAAGTAACAG;AGTGCAAAAAGCATGACTGT;TGGACATTCGTCTAGTAACA	-0.07;0.34;0.44;0.78	46824;66839;69913;76546	9.62E-01;7.84E-01;4.81E-01;6.87E-02	3088;9721;12795;32811	1.86E+00;1.54E+00;1.16E+00;8.61E-01
	Kcnh2	0.37163	1.29876	4	CGGATGACATTGAGGCAATG;GGCCTGCGCGATCTGCGCGG;CTGCCCCGTACTCCGAGTAG;CACCTATGTTAATGCCAACG	-0.19;0.25;0.56;0.86	40044;62900;73080;77374	7.82E-01;6.07E-01;5.94E-01;5.00E-02	2260;6554;16734;39590	1.53E+00;1.47E+00;1.21E+00;9.82E-01
	Olfr201	0.371408	1.3386	4	AGATAGGAGAAAGCATTCCG;TTGAGCAAAGCACTCAACCA;AATCATTCTGGGAGTCACAG;AGTCTATTAGACATCAACAC	-0.37;0.22;0.8;0.84	30087;61674;76740;77164	8.86E-01;7.37E-01;4.39E-01;5.47E-02	2470;2894;17960;49545	2.13E+00;1.45E+00;9.47E-01;8.24E-01
	Taldo1	0.371382	1.3261	4	TTCTGAATTCAGGCCTCAAG;GCGCATCCTTGATTGGCATG;GCTTGTATTCATCGATGGCT;CTTCTTTGTAAAGCTCGATG	-0.37;0.41;0.5;0.96	29795;68867;71425;78076	1.09E+00;5.27E-01;4.35E-01;3.43E-02	1558;8209;10767;49839	2.07E+00;1.29E+00;1.13E+00;8.14E-01
	Pth1r	0.371124	1.41709	4	TCATAAATGTAATCGGGACA;GAGCAACCTTGGCCAACACT;TCCAGGGCACAACCGGACGT;CCGCCCACCTAAAATAGGCT	0.08;0.33;0.4;0.66	55263;66467;68820;74948	1.10E+00;9.42E-01;4.55E-01;1.05E-01	4686;10814;13167;24371	2.06E+00;1.82E+00;1.08E+00;7.07E-01
	Vmn2r5	0.370688	1.21169	4	AGCACGGGAAAATATCTCGT;TCAATCTGGATCTTATCACT;ACAATTGCTTAAATGATCCA;GGAATTCCTCGCTTACGAAG	-0.35;0.12;0.28;1.42	31196;57123;64432;79409	6.08E-01;4.53E-01;3.93E-01;4.89E-03	225;15202;22511;48438	1.95E+00;1.19E+00;8.64E-01;8.44E-01
	Chd9	0.370519	1.2612	4	AGAAACCATTAGTTTCCGCG;CAATTGAATCAGAAGGACGT;GAAGAAAATAGAGCAATCCA;GCCAGAGCCAGACCATTCCG	-0.24;0.26;0.29;1.17	37168;63630;64511;79016	8.10E-01;5.48E-01;3.94E-01;1.35E-02	617;15123;16004;42466	1.59E+00;1.52E+00;1.09E+00;8.48E-01
	Dpyd	0.37051	1.28644	4	GAGGCACAGCTTATACTCGC;AGAGCTAAGAGTCATTTCAT;CTATAACCTTCCGTGGCGAG;TTTGTCCAGGGCCATACAAG	-0.02;0.1;0.46;0.94	49422;56321;70434;77989	8.68E-01;5.90E-01;4.95E-01;3.62E-02	1645;9200;23313;30212	1.68E+00;1.20E+00;1.15E+00;1.11E+00
	Chtf8	0.370504	1.23678	4	AGACCTACATTACACCACTG;TGTAATGTAGGTCTCCCAGG;GGAATCCCTGTGCTGATCGT;GCCCTTTACTTTCAGTACGG	-0.2;0.05;0.5;1.13	39365;53621;71543;78880	5.92E-01;5.37E-01;5.31E-01;1.65E-02	754;8091;26013;40269	1.43E+00;1.30E+00;1.18E+00;1.03E+00
	Rae1	0.370423	1.30208	4	TCTTCTCTAGATATACCCGA;CAGTGGGCAAACCATTCCAA;GATGTCACTTCGATATCCTG;ATAGCCACACACCGATGCTA	-0.06;0.22;0.42;0.89	47672;62031;69446;77594	8.10E-01;7.50E-01;4.69E-01;4.51E-02	2040;10188;17603;31972	1.59E+00;1.47E+00;1.13E+00;1.02E+00
	2410004B18Rik	0.370224	1.37537	4	TCAGTAGTGTAGGTCTCTGG;GGAAGACGCGGGTCGCAAGG;GCTGTTCTCATCCGACGAGT;TAAGCCGCGAAGTAGCTCAA	0.02;0.31;0.44;0.71	52123;65364;69881;75720	9.67E-01;8.87E-01;4.80E-01;8.75E-02	3914;9753;14270;27511	1.85E+00;1.72E+00;1.16E+00;7.72E-01
	Tpr	0.37009	1.4128	4	GGGAAGACTTAAGTAAAGCA;AATCGAAAAATTAAGTGACA;ACCCGTCATTGACTCCACAG;GCCTGGCATGAAATTAACTG	0.14;0.29;0.33;0.73	58113;64629;66175;75888	1.24E+00;8.53E-01;4.11E-01;8.37E-02	3747;13459;15005;21521	2.27E+00;1.66E+00;9.27E-01;7.88E-01
	Fgfr3	0.369527	1.21877	4	GTATAGTTGCCACGATCGGA;GAGGCTGGCAGCGTGTACGC;TGACAAGGACCTGTCGGACC;TCTGTTACCTGTCGCTTAAG	-0.24;-0.12;0.47;1.37	37082;44325;70630;79353	5.46E-01;5.01E-01;4.37E-01;6.12E-03	281;9004;35309;42552	1.85E+00;1.22E+00;1.09E+00;7.12E-01
	Gtf3a	0.369058	1.38074	4	AAACCCACAAAAACAGTATG;GCACCTATGCAAACACACGG;GCATGTCCTGATTCACACCG;CATCGCGGATGCGTTCGTCG	0.03;0.16;0.64;0.64	52362;59259;74597;74606	9.76E-01;6.82E-01;6.63E-01;1.13E-01	5028;5037;20375;27272	1.86E+00;1.68E+00;1.30E+00;6.83E-01
	2010109A12Rik	0.368866	1.40738	4	TTATCTTCAAGGATTCAGAA;GAGAGGCAGAAACGATTCCA;AAAATAGCATCAGAGATATG;CCTTTCTGCATAACTTATCG	0.13;0.19;0.53;0.63	57334;60592;72243;74361	1.20E+00;7.02E-01;5.57E-01;1.19E-01	5273;7391;19042;22300	2.21E+00;1.38E+00;1.37E+00;6.66E-01
	Rhag	0.368777	1.2626	4	GCAATGGCTGAATTAAAGCT;CCTGCATAATCGTACCCCAT;GGCATAGGCTGTGATCACAC;TCATGATCAACATTTGAATG	-0.37;0.16;0.62;1.06	30098;59133;74243;78618	6.59E-01;6.59E-01;4.39E-01;2.23E-02	1016;5391;20501;49536	1.62E+00;1.31E+00;1.30E+00;8.25E-01
	Rpap1	0.368546	1.2365	4	CAAGTGTTGTCCCAGATCGT;GGTGGTGACCTTTACAGGTG;TTCTTTAGTGACAAGAACTG;CCTATAGGGGACCAACTGGT	-0.28;0.1;0.54;1.11	34992;56322;72444;78815	5.90E-01;5.66E-01;5.09E-01;1.79E-02	819;7190;23312;44651	1.40E+00;1.39E+00;1.15E+00;1.01E+00
	Rida	0.368245	1.39449	4	CAGTAAAAAACATTACCTGT;TCACAGGCTCTTAAAAACTT;AGTGGACAGCTTGTGCCAGG;ATTTACATTTCTGGACAGGT	0.11;0.16;0.56;0.65	56487;59260;72895;74645	1.16E+00;6.63E-01;5.86E-01;1.12E-01	4989;6739;20374;23145	2.15E+00;1.44E+00;1.30E+00;6.85E-01
	Psmd13	0.368001	1.26802	4	CATCTTTGTAGTAGGACGCG;ACCCTGTACGCTTTCAATAG;TGTGAACGGACGTCACACCA;CATGTGGTTAGACAGATGAC	-0.41;0.16;0.66;1.07	27585;59114;74832;78654	6.99E-01;6.59E-01;4.12E-01;2.15E-02	980;4802;20520;52049	1.72E+00;1.32E+00;1.29E+00;7.39E-01
	Gpr150	0.367967	1.24145	4	GGACCGCATTCGCCTCCACG;CAGCGCACCACGAAGGTCGG;GCTGACCTGTACGCAAGTGG;GCGCTCTATGAAGCTATCGT	-0.25;0.06;0.57;1.09	36208;54379;73261;78746	6.03E-01;5.51E-01;5.30E-01;1.95E-02	889;6373;25255;43427	1.49E+00;1.36E+00;1.06E+00;1.05E+00
	Utp15	0.367883	1.29181	4	GCTGTGGACGACTTTGTAGG;TGTCCCAGACTTTAACATAG;GAGAGTACCGGCCATAAATG;TACAGCTGACAATTATCATG	-0.19;0.05;0.72;0.88	40046;53597;75849;77559	7.84E-01;6.07E-01;5.37E-01;4.58E-02	2075;3785;26038;39588	1.91E+00;1.21E+00;1.03E+00;1.02E+00
	Tagln3	0.367322	1.40802	4	ATAAACAGTTTATATCCACC;GAGCTATGGCTTAAGCCGAG;GATTGAGCAGAAGTATGACG;GGTCCTGACACCATAGACCT	0.1;0.22;0.55;0.6	56218;61599;72745;73850	1.14E+00;7.35E-01;5.79E-01;1.31E-01	5784;6889;18034;23419	2.13E+00;1.44E+00;1.43E+00;6.35E-01
	Socs4	0.367214	1.30157	4	GAGTCGAAGTGCTGACAGGA;AGTAACAATCCGTGCTACTG;CTAAAGGCTAAATCTGAGCG;TGAGTGCAGACCTGTCTGAG	0.03;0.1;0.42;0.92	52576;56194;69347;77812	9.85E-01;5.87E-01;4.67E-01;4.02E-02	1822;10287;23440;27058	1.88E+00;1.14E+00;1.12E+00;1.07E+00
	Tigar	0.367087	1.377	4	CCTTCTCCAGCGATCTCACG;GTAGGTAAAGATGCGCGGAA;CAGATGTACGGAGTCGCGGA;CGAAACCCAGTCTCCGAAAG	-0.03;0.36;0.46;0.68	49150;67354;70528;75147	9.91E-01;8.59E-01;4.98E-01;1.01E-01	4487;9107;12280;30484	1.91E+00;1.67E+00;1.21E+00;7.23E-01
	Prrc1	0.366987	1.39498	4	GGCGTGGAATACACGTGTGG;ACAACCTACGACATCACGAG;AGCCATGCCAGGATCCAGCG;GAAGATCCCAGAATTAACAG	-0.01;0.33;0.54;0.61	50068;66491;72442;73979	9.43E-01;8.90E-01;5.66E-01;1.28E-01	5655;7192;13143;29566	1.82E+00;1.72E+00;1.39E+00;6.43E-01
	Rsrp1	0.366735	1.31231	4	TGATCGCGTAGTACGACCAC;ACCGCGACAGCCGTTACGAG;TGTACCCCGAGGATCGCCCC;TTTCTCACTCAGGCGAAATG	0.0;0.14;0.51;0.82	50974;58182;71663;76972	9.23E-01;6.34E-01;5.35E-01;5.90E-02	2662;7971;21452;28660	1.78E+00;1.31E+00;1.24E+00;9.18E-01
	Foxn4	0.366571	1.27468	4	GAAGCTGTAGATCTCACTCA;CATGCTAACTCATGCCACCA;GCAAATGGGCGGATAGACCT;GATGCACAAGTGGAAACGAA	-0.45;0.13;0.71;1.08	25429;57424;75662;78727	7.67E-01;6.15E-01;3.95E-01;1.99E-02	907;3972;22210;54205	1.87E+00;1.36E+00;1.20E+00;6.68E-01
	Slc28a1	0.366508	1.30327	4	AAGGCGTGAAGCTGACGTAT;AGCCACTGAAACCCTAAGTG;AAAAGTTCTACCTACCCCAA;GGTCTTCCTGAGTTACACCG	-0.4;0.29;0.65;0.93	28214;64679;74758;77876	8.55E-01;6.93E-01;4.18E-01;3.88E-02	1758;4876;14955;51419	1.70E+00;1.67E+00;1.08E+00;7.60E-01
	Gm13078	0.366381	1.28662	4	AAAGCTTCAGAACATCCAGT;TGATTTGCGAGATGCCCACA;ATCTTCATCAGGGATCCCAC;GGAAATCATCCCATCCTAGG	-0.03;0.19;0.37;0.94	48827;60647;67732;77944	8.48E-01;7.04E-01;4.34E-01;3.72E-02	1690;11902;18987;30807	1.65E+00;1.38E+00;1.10E+00;1.01E+00
	Dld	0.36635	1.46521	4	AGAGAAGCTGGTTGTTATTG;CAAAAACATCCTTGTAGCTA;GGTGGAACATGCTTGAACGT;GCAGTAAAAGCATTAACAGG	-0.89;0.25;0.94;1.17	8783;63026;77999;78990	1.11E+00;7.87E-01;5.08E-01;1.41E-02	644;1635;16608;70851	2.62E+00;1.54E+00;1.50E+00;2.03E-01
	Olfr606	0.366037	1.39731	4	AATGCTAGACGAACCAGGAG;AATCCAGTTTAATATTTGCG;GTGGTGATTCTTATGCTGTG;GAATCGTAGCATATCGCAGG	0.15;0.18;0.47;0.67	58484;59985;70789;74969	1.26E+00;6.83E-01;5.06E-01;1.05E-01	4665;8845;19649;21150	2.30E+00;1.34E+00;1.23E+00;7.09E-01
	Card6	0.36597	1.32996	4	TTATCATATACAAAGCACTG;AGTGGGAGCTTATAGCCCGG;GAAAGGCATTAGACAAACAC;AGCTTTCTAGATCGCCACGA	-0.49;0.32;0.7;0.93	23877;65867;75545;77892	9.11E-01;7.56E-01;3.85E-01;3.84E-02	1742;4089;13767;55757	1.85E+00;1.77E+00;1.09E+00;6.19E-01
	Kcnc4	0.365495	1.33654	4	CTATTATGCCGAGCGAATTG;GTGACGGAGATTCATCGGGT;GTACAAAGCGTACCACACGC;AGCATCGCGGTGCTGCCGGT	0.05;0.19;0.45;0.77	53537;60296;70248;76515	1.02E+00;6.93E-01;4.90E-01;6.94E-02	3119;9386;19335;26097	1.94E+00;1.36E+00;1.19E+00;8.57E-01
	Hipk2	0.365442	1.34465	4	ACAGGTCAATGAACTCCCGT;TTAGGTTATGTGGTCCACCG;ACTGGGCGAATATACTTGAG;TTCAGCAATGACACAACCAA	0.1;0.2;0.32;0.85	56179;60709;65714;77263	1.14E+00;7.06E-01;4.06E-01;5.25E-02	2371;13920;18925;23455	2.12E+00;1.39E+00;9.63E-01;9.04E-01
	Hinfp	0.365155	1.29023	4	GAAAGCGCATGTGATTCCGG;GGGTGTCTAGGTGCTTCCGG;TGAGTGGTTCTATCGGCATG;CAACTTCTTACGATCCAATG	-0.27;-0.15;0.79;1.08	35638;42475;76651;78731	8.74E-01;5.20E-01;4.30E-01;1.98E-02	903;2983;37160;43996	2.11E+00;1.36E+00;1.03E+00;6.64E-01
	1700001L19Rik	0.364927	1.11627	4	CCTCCTTCTTTAAGCCACCG;CTTTCAGCTACATCCCACCA;GAGAACATGCAAAGAACCTG;TCTCTGTTTATTCCCAGACA	-0.53;-0.38;0.26;2.11	21664;29225;63570;79592	4.90E-01;3.87E-01;3.77E-01;8.95E-04	42;16064;50408;57971	2.68E+00;8.08E-01;5.52E-01;4.29E-01
	Tarbp1	0.364712	1.28875	4	GCGTAAACACGGCGCCACGG;CAGCACCGTCCCACGTCCGA;GACCAACCATGAGCGCCACG;CATTACCTCTGAGAGTTCCG	-0.11;-0.07;0.7;0.94	44713;46694;75475;77990	7.50E-01;7.23E-01;4.52E-01;3.62E-02	1644;4159;32940;34921	1.83E+00;1.43E+00;1.11E+00;7.80E-01
	Tlr9	0.364501	1.31114	4	GCAGGCTGTATAGGCCGGCG;TCTCTGGCTTGATAGTCACC;AAGATAGGTAGTTGTCTCGG;ACATTCTATACAGGGATTGG	-0.38;-0.01;0.88;0.96	29459;50141;77540;78121	1.01E+00;4.86E-01;4.32E-01;3.33E-02	1513;2094;29505;50175	2.41E+00;1.14E+00;8.93E-01;8.02E-01
	NO_CURRENT_188	0.364199	1.47966	4	GCTATTCCGCTCGTCAATTT;GCTCCAGGTGCGAGATAGGC;GCTAGTTCTCCCGGGCGAAA;GCTCATACTGATGAACGTCC	0.21;0.32;0.35;0.58	61474;65971;66919;73347	1.44E+00;9.16E-01;4.21E-01;1.43E-01	6287;12715;13663;18160	2.57E+00;1.78E+00;9.67E-01;6.08E-01
	Elk1	0.363742	1.18653	4	GCCGAGGTTACAGACACCTC;GGATGGTGGTGAGTTCAAGT;CTTATCATAGTAGTACCGCA;GGTTATCCTAACCCCACCAG	-0.25;-0.05;0.19;1.57	36211;47921;60542;79500	5.30E-01;4.63E-01;3.75E-01;2.90E-03	134;19092;31713;43423	2.17E+00;1.05E+00;8.18E-01;7.00E-01
	Brca2	0.363224	1.29495	4	TTGGGAGTGACAATACACCC;ATGTACCCAATATGCGAGAG;GTACCCAAAGTCTCGTCAAG;TGCTTTGGCATATTATACGG	-0.56;0.32;0.56;1.13	20536;65826;73076;78878	9.09E-01;5.94E-01;3.75E-01;1.65E-02	756;6558;13808;59097	1.76E+00;1.47E+00;1.43E+00;5.18E-01
	Klhl26	0.363179	1.61085	4	GATTGCGCTGTGGATCATAG;CCAGCACAGCCACGCCCGCG;CAAAATCGATGATGTGACGC;AGCCTTTCATGCGCACAAGG	0.33;0.34;0.38;0.4	66364;66645;68143;68753	1.81E+00;9.52E-01;4.42E-01;2.55E-01	10881;11491;12989;13270	3.11E+00;1.84E+00;1.04E+00;4.54E-01
	Olfr876	0.363115	1.44221	5	AAAAGGAGTAAACAAACCTG;CATGGCCCACACCATATCCA;AGAACATCATCTCACATCCA;GACTACCAGTTCATTCACAT;GCTGAGAAAGAAGTACATAG	0.05;0.09;0.1;0.31;1.26	53825;55817;56026;65335;79199	1.43E+00;8.81E-01;5.14E-01;3.91E-01;1.19E-02	435;14299;23608;23817;25809	2.45E+00;1.57E+00;1.55E+00;8.90E-01;7.49E-01
	Mgst3	0.363081	1.32308	4	TGTAGTAGCCATATGCGTAA;TACAGCACAGATCCTGAGAA;CGACACTCACGTGTTCTGGT;GGTGGGAGGTGTTTACCACC	0.0;0.02;0.64;0.78	51000;52207;74601;76605	9.24E-01;6.82E-01;5.14E-01;6.73E-02	3029;5033;27427;28635	1.78E+00;1.68E+00;9.70E-01;8.68E-01
	Acox3	0.362943	1.47001	4	TCAGCACTAGAATCTTCAGG;GCGCATACTTCCGTACCTGG;CAAGACGGCAACTCATGCGG;GCCTCATGGACAGCCCAGCG	0.14;0.36;0.45;0.51	58008;67248;70153;71771	1.23E+00;9.85E-01;4.87E-01;1.81E-01	7863;9480;12386;21624	2.26E+00;1.90E+00;1.18E+00;5.39E-01
	Arl1	0.362755	1.41816	4	TTCAGCTATTGGATTTAATG;TGGAAATGCCAATTCGATCT;TTCCAAGTTTGGGACTTAGG;CTGTCTGCTTACCTCCAACA	0.06;0.34;0.48;0.57	53852;66867;71006;73248	1.04E+00;9.64E-01;5.13E-01;1.45E-01	6386;8628;12767;25782	1.96E+00;1.86E+00;1.25E+00;6.03E-01
	Itga5	0.3625	1.33181	4	TTTGCTGTCAAATTGAATGG;GACCCACAGAATGACCCAGT;GTCTTACATAGCCATAGGTG;GTCGTATTTATATTCCCGGG	0.1;0.14;0.4;0.82	55932;58038;68598;76974	1.13E+00;6.30E-01;4.51E-01;5.90E-02	2660;11036;21596;23702	2.11E+00;1.24E+00;1.07E+00;9.18E-01
	Grhl3	0.362254	1.53579	4	AGTGACTTTGAATACACCCT;CTCTACGACTACTATATGGT;ACCCTTCACTCCCTTCTGCG;GGTCGTGTTCGATAATGACA	0.29;0.32;0.33;0.51	64611;65874;66400;71788	1.66E+00;9.12E-01;4.14E-01;1.80E-01	7847;13234;13760;15024	2.90E+00;1.77E+00;9.39E-01;5.39E-01
	Ccdc22	0.361902	1.32495	4	TAGCCTACCCACCAGATGGA;TAGGTCTCGGACTTGTGTCG;CATCAGGATTAATCACTCGA;CCTGAGTTGAATTCCAGCGG	-0.24;0.26;0.7;0.72	37248;63600;75478;75878	8.09E-01;7.50E-01;5.50E-01;8.39E-02	3756;4156;16034;42387	1.83E+00;1.58E+00;1.10E+00;7.87E-01
	Prpf38a	0.361668	1.29671	4	TAGGTATGTCCGGATGCTGG;TTTCGATAGTCATTGTACAA;TCTTCTAGGGCACTAACTCG;TTGTCTCATACCTGTAGCCG	0.04;0.16;0.26;0.99	53183;58965;63419;78263	1.01E+00;6.54E-01;3.86E-01;3.01E-02	1371;16215;20669;26454	1.91E+00;1.29E+00;1.18E+00;8.02E-01
	Megf10	0.361292	1.44253	4	GCGATGTCCATAAAAACCGG;TCTTTCCAAAGCGACCCTCA;TTTATCCCGTAGCGTCCCAG;CCGGACAGCCTACCGCCACG	0.06;0.39;0.45;0.54	54317;68558;70120;72507	1.07E+00;1.06E+00;4.86E-01;1.63E-01	7127;9514;11076;25317	2.03E+00;1.99E+00;1.18E+00;5.68E-01
	Gm21992	0.361195	1.62545	5	CACACTCGATGACGCGTCCA;GCTCTTGGTTGGTACAAGTG;CAGAGCGGCTGCTATCGGTG;GCTCGGTCAAGTCTGCCACG;TTGTATTACAACAACACGTA	-0.92;-0.26;0.61;1.16;1.21	8178;35749;74108;78987;79089	1.41E+00;1.41E+00;4.78E-01;4.72E-01;1.49E-02	545;647;5526;43885;71456	3.19E+00;2.54E+00;1.48E+00;6.84E-01;2.35E-01
	Hydin	0.361123	1.21053	4	AGAATCGTATGATATCGCTC;CAGAAATGTCGATGCCCAGG;ACGGGCGGGATTCTCAACGT;TTGGACGGTTAAACCCAGTG	-0.14;-0.07;0.37;1.28	42903;47101;67630;79229	6.75E-01;4.56E-01;4.33E-01;8.84E-03	405;12004;32533;36731	1.70E+00;1.34E+00;1.01E+00;7.92E-01
	Nfatc4	0.360353	1.41262	4	GTCCCGCCGAGGCAGCCTTG;CCTGTATGCAGCGTGCGACG;TTCAGATGTGTCCTCTAGCG;GGTAGCTTCCCATTGCACGA	0.16;0.22;0.47;0.6	59042;61640;70674;73773	1.29E+00;7.36E-01;5.02E-01;1.33E-01	5861;8960;17995;20592	2.35E+00;1.45E+00;1.22E+00;6.31E-01
	Spaca3	0.360041	1.29627	4	TGCAGAACCCTCGCCTCGAA;GCTGATGGAAGCACCAACAA;GCCAGCCAAGTGATCCCAGG;AGTCAGCCAGGTTATAACCC	-0.2;0.24;0.63;0.77	39142;62715;74316;76520	7.75E-01;6.63E-01;5.88E-01;6.93E-02	3114;5318;16919;40492	1.63E+00;1.52E+00;1.17E+00;8.58E-01
	Klhl1	0.359509	1.27936	4	ATGACCTCCGAACAAATCTG;TGCCTGCAACAGGACAGCGG;TTTCCATGCACTGATGATGT;CCTTACTACCAGTTGCCACG	-0.39;0.33;0.54;0.96	28657;66225;72522;78113	9.29E-01;5.69E-01;4.23E-01;3.35E-02	1521;7112;13409;50977	1.80E+00;1.40E+00;1.14E+00;7.75E-01
	Olfr729	0.359238	1.36696	4	CAGGCGAGTTTGACCACTCG;TTCATTCACCTCTTTACAGG;ATACTTATTGTGGTAAACAG;GGAAATACATCGGTGAGTGC	-0.19;0.39;0.61;0.63	39712;68470;73921;74416	1.06E+00;6.39E-01;6.00E-01;1.18E-01	5218;5713;11164;39922	2.02E+00;1.58E+00;1.20E+00;6.70E-01
	Gm3285	0.359089	0.811577	1	GCAGTCATCCACCTGCCAGG	0.36	67345	0.0728	12289	0.812
	Esp8	0.359071	1.36472	4	TTTCTTCAGAGCAAATTGAT;TCTGAGTACAACATTTGCTC;CTATGAAGTTTCGTTCACAT;CAGTGTTTGATCTTGATTGG	-0.37;0.41;0.68;0.72	29925;69092;75138;75773	1.10E+00;7.22E-01;4.37E-01;8.63E-02	3861;4496;10542;49709	2.09E+00;1.77E+00;8.19E-01;7.77E-01
	Senp8	0.35887	1.33551	4	CAAAGGCAAACCCAATAATG;ATAAACCAACAAACTCCAGT;GGAACATGGCAATTTCTGCA;GTTATATGGACAGTCTATTG	0.08;0.22;0.34;0.8	55075;61860;66673;76725	1.09E+00;7.44E-01;4.18E-01;6.46E-02	2909;12961;17774;24559	2.04E+00;1.46E+00;9.53E-01;8.84E-01
	H2-Q1	0.358665	1.464	4	TCAGATGGGCGCCTTCAAAG;AGTATTGGGAACGGAACACA;GCTGCGGTATTTCGAGACCT;GAAACACAGGACCTACCTGG	-1.05;0.44;0.6;1.45	5423;69780;73909;79425	1.15E+00;6.57E-01;6.39E-01;4.54E-03	209;5725;9854;74211	2.18E+00;1.98E+00;1.57E+00;1.23E-01
	Zbtb18	0.358578	1.32804	4	AAGACCGAGTCCTCCCTCAG;ATCTGCCGAATCCCTCACGG;TGGGCAGGTCACCTGCCATG;CTTTGACAATGTCATACATG	-0.02;0.05;0.7;0.71	49494;53723;75445;75652	8.70E-01;7.47E-01;5.39E-01;8.91E-02	3982;4189;25911;30140	1.83E+00;1.69E+00;1.03E+00;7.66E-01
	Ddost	0.358477	1.25913	4	GGTCAGAAACATCATAGTTG;GAACTCCCCGTACTTAATGA;CCCAGATAAACCAATCACCC;AGGCAACTATGAACTAGCTG	-0.42;0.03;0.75;1.08	27363;52266;76195;78698	8.20E-01;5.15E-01;4.10E-01;2.05E-02	936;3439;27367;52271	1.99E+00;1.34E+00;9.72E-01;7.31E-01
	Gm10324	0.358431	1.23269	4	ATATCTGAGACCACTGTGAG;GAGATGACTAGATGTAGCAA;ATATCTGAGACAACTGTGAG;GGCATGGAAGAAGTCATAGG	-0.4;0.19;0.55;1.1	28353;60511;72637;78769	6.99E-01;5.74E-01;4.20E-01;1.90E-02	865;6997;19123;51281	1.41E+00;1.38E+00;1.38E+00;7.65E-01
	Gngt1	0.357567	1.25652	4	AAAGGACAAGTTGAAGATGG;CATCGAAGACCTGACAGAAA;GATTATATTGAAGAAAGGTC;AGTGACACTGGAGAGAATGA	-0.24;0.3;0.39;0.97	37276;65188;68506;78173	8.78E-01;5.50E-01;4.49E-01;3.21E-02	1461;11128;14446;42358	1.71E+00;1.16E+00;1.10E+00;1.06E+00
	Atp6v0e2	0.357452	1.28634	4	ACCACATTCTGGGGCCTCAT;GACAGCAGTAGCTACCAGCA;GTGCCCAAAGGACCCAACCG;GGTCCTTTGGGCACGAACCA	0.05;0.1;0.36;0.92	53435;56299;67481;77808	1.02E+00;5.89E-01;4.30E-01;4.03E-02	1826;12153;23335;26199	1.93E+00;1.15E+00;1.07E+00;9.99E-01
	Ncor1	0.357343	1.19295	4	GGGCCTAGCAAACTACCCCG;ATATGCCGAGCATTACCCAG;CCCTACCAAAGCCGACTCCG;GGCTTCACGGAAACCCCGTG	-0.17;-0.06;0.28;1.38	40960;47317;64472;79364	6.28E-01;4.57E-01;3.93E-01;5.88E-03	270;15162;32317;38674	1.87E+00;1.25E+00;8.46E-01;7.99E-01
	Dmrtb1	0.356357	1.39939	4	TGATCAGACTTGAATCTCAG;CCGGAACCGCCCTAGGCAGT;AGGACTGGTAGGGTGAAACA;TGCGCGACCGTTCCTCCGCG	0.18;0.22;0.35;0.67	60154;61837;67117;75034	1.35E+00;7.43E-01;4.24E-01;1.03E-01	4600;12517;17797;19480	2.45E+00;1.46E+00;9.78E-01;7.14E-01
	Sspo	0.356033	1.25326	4	AAGCCCTCAACACCAATCCA;AGTGGAGAATGCACCCCTCG;CCAACGCCTTGGTACATGTG;GCTGCCTATTGGGCAATAGG	-0.19;0.15;0.6;0.87	39756;58400;73881;77402	6.39E-01;6.37E-01;6.01E-01;4.94E-02	2232;5753;21235;39878	1.57E+00;1.25E+00;1.20E+00;9.87E-01
	Actr1b	0.355792	1.44604	4	TCAACCCGCATGATGGAGTG;TACGCAACAGGACGCACCAC;GTTCATTGGACCGAAAGCAG;GCATCCTGTTCTTCTAACGG	0.2;0.31;0.31;0.6	61088;65327;65609;73824	1.41E+00;8.85E-01;4.05E-01;1.32E-01	5810;14025;14307;18546	2.53E+00;1.72E+00;8.99E-01;6.34E-01
	NO_CURRENT_234	0.355492	1.4164	4	TACTTACCGACCGACAAACG;TACTTAGGTCCGCGTAAAGC;TAGACGTCCACCGACTCTGA;TAGAATGGCCAGCGGCATGG	0.16;0.3;0.33;0.63	59113;65163;66386;74346	1.29E+00;8.77E-01;4.14E-01;1.19E-01	5288;13248;14471;20521	2.36E+00;1.71E+00;9.38E-01;6.65E-01
	Copg1	0.355264	1.3982	4	CTACTGCATGATGATCCGAG;TGGTCAAATAGCACATGCGG;GGCTATGAAGCACCCTTCAG;TCGCTTTATCTACAACCGTG	0.19;0.2;0.38;0.65	60300;61111;67919;74792	1.36E+00;7.19E-01;4.38E-01;1.09E-01	4842;11715;18523;19334	2.46E+00;1.41E+00;1.02E+00;6.96E-01
	Phlda2	0.355151	1.39002	4	CTTGTAATAGTTGGTGACGA;GATCGACTTCCGCTGCACGG;GCTCCACGCAGTCCACCTTG;TCCGACGAGATCCTTTGCGA	0.15;0.17;0.5;0.6	58641;59361;71516;73889	1.27E+00;6.65E-01;5.30E-01;1.30E-01	5745;8118;20272;20994	2.32E+00;1.31E+00;1.30E+00;6.37E-01
	Ankrd33	0.354998	1.25832	4	TTGCACACCTGCCATAAGGA;AGCCTGTAGCCTTTCTAGGA;CTGGAACGCAGGGACCAGCG;GGTCAGAACGGCCCATTCCA	-0.02;0.05;0.09;1.31	49650;53363;55497;79273	8.76E-01;5.33E-01;3.87E-01;7.87E-03	361;24137;26271;29984	1.75E+00;1.70E+00;1.02E+00;5.72E-01
	Cct5	0.354689	1.07484	4	CACCCAATCAGAATTGCTGA;CAGGAGGACGGATTGTCCCA;GATGTGACTATAACAAACGA;CGTGAATGCCGTCCTCACGG	-0.74;-0.11;-0.07;2.34	13479;44398;47042;79603	4.72E-01;4.38E-01;4.11E-01;6.55E-04	31;32590;35236;66154	2.81E+00;7.14E-01;4.55E-01;3.22E-01
	Dpm2	0.354545	1.36187	4	ACCGGGACAGACCAAGCAGT;TGATCAAGCTAACGGCGACA;ACATGCTGGCTGTCAATGAA;CTTCACCTACTACACCACTT	-0.34;0.47;0.58;0.71	31339;70708;73398;75726	1.23E+00;6.10E-01;4.55E-01;8.74E-02	3908;6236;8926;48295	2.30E+00;1.51E+00;8.69E-01;7.73E-01
	Ccdc61	0.354527	1.41162	4	AAGACTTGACTCATAAGACG;CTGGAGTTACGGCAGGAGCG;CTCCACGTCCCGTGGTCGCG;ATTCGGTGGAGTTTGACAGG	0.12;0.32;0.39;0.58	57137;65957;68491;73475	1.19E+00;9.16E-01;4.48E-01;1.40E-01	6159;11143;13677;22497	2.20E+00;1.78E+00;1.06E+00;6.14E-01
	D17H6S53E	0.3542	1.31596	4	GCTGCTGCGTTGGTTACGGG;GGTGCCTAGTCTCCCTTGAG;GGGTCGAAAGAAATCAACAA;ACCTCAAAGTGGATCAACTG	0.04;0.11;0.54;0.73	53299;56644;72412;75882	1.01E+00;5.97E-01;5.64E-01;8.38E-02	3752;7222;22990;26335	1.92E+00;1.39E+00;1.16E+00;7.88E-01
	Zfp503	0.35411	1.25383	4	AGAAGGTCCTTACCTCGATG;CGATGTCGCTCAGCTTCAAG;CGGTTTGTAGGGAGATACCG;GGGTCGAGTGCCACACCGTG	-0.27;0.19;0.62;0.88	35156;60504;74250;77501	6.99E-01;6.59E-01;5.12E-01;4.71E-02	2133;5384;19130;44478	1.62E+00;1.38E+00;1.01E+00;1.01E+00
	1300017J02Rik	0.353761	1.34412	4	CAGCTCGTATTGGTCCCTGT;AACAGCAGGTCCTCCCCGTG;GCCAAAGTATGGTTCCCGGG;GCCTACGTCGCAGGCCACTG	-0.7;-0.01;0.93;1.19	15047;50462;77900;79051	1.09E+00;4.90E-01;3.94E-01;1.27E-02	583;1734;29172;64587	2.57E+00;1.54E+00;9.04E-01;3.64E-01
	Sf3b3	0.353735	1.38217	4	ATGGCGTTTAGGCTAACAGG;GAACACTCTGGTGTATCACG;AAAGCCCGATGCAAATTCCA;GGCATGGCAGACGAAAACTC	-0.11;0.44;0.49;0.59	44538;69915;71367;73685	1.16E+00;7.18E-01;5.25E-01;1.35E-01	5949;8267;9719;35096	2.19E+00;1.42E+00;1.28E+00;6.26E-01
	Mrpl10	0.353664	1.27592	4	GGAAGTGCATGACTCGCCAG;AGGTTGTGTCCGACAAAAAG;CTGCTACTATATCTTGACGC;GGCCACTCCTTACCCGCCCG	-0.12;0.04;0.68;0.81	44366;53116;75175;76892	7.25E-01;7.13E-01;5.29E-01;6.08E-02	2742;4459;26518;35268	1.78E+00;1.41E+00;1.01E+00;9.07E-01
	Bpifa1	0.353538	1.20247	4	CCACCGTTGCCACTGAACCA;TCGAGGATGTTGTTCAGGAG;ACGTTGAGTGTCAAGCCCAG;GACTTTATAACATCCAGGAG	-0.32;0.15;0.47;1.12	32387;58461;70816;78835	6.41E-01;5.07E-01;4.69E-01;1.75E-02	799;8818;21173;47247	1.41E+00;1.26E+00;1.24E+00;9.07E-01
	Soga1	0.352915	1.35053	4	ACAGCATGATCTCCTTAGCA;CAAGTACAGATCGCTCTATG;CTGCTCCAGGACGAGCGTCG;CGAGCTGGCCAAATACCGCT	-0.0;0.3;0.51;0.61	50541;64907;71712;74098	9.07E-01;8.65E-01;5.37E-01;1.25E-01	5536;7922;14727;29093	1.75E+00;1.69E+00;1.32E+00;6.50E-01
	Bysl	0.352895	1.08499	4	CCTGGTGGCTTGATACATGG;AGTTTACCGAGGAGTCCGGG;GGGACCCGAGAAAAACGGCG;TGAACAAGAATCCTCCCGTG	-0.48;-0.31;-0.03;2.23	24255;32964;49274;79599	4.52E-01;4.42E-01;3.87E-01;7.42E-04	35;30361;46670;55382	2.76E+00;6.31E-01;4.77E-01;4.76E-01
	Hsd11b2	0.352614	1.25371	4	CCACTCTTGCGTCACTCGAG;GCTAAGAAACTGGATGCCAT;GGTGATGAGCACCGCGCGAG;CGCTGGCCTCAATATCGTAG	-0.19;0.27;0.46;0.87	39697;64056;70360;77475	8.28E-01;5.99E-01;4.93E-01;4.77E-02	2159;9274;15578;39937	1.62E+00;1.20E+00;1.20E+00;1.00E+00
	Hoxd11	0.352519	1.21551	4	GCCGGGCTGCGCTTACTACG;TGAAGAGCACGTCTGGCCGG;GAGGTGGCCTTTCGCGACTA;CTTTGATCAGTTCTACGAGG	-0.18;0.13;0.46;1.0	40774;57567;70393;78329	6.23E-01;6.18E-01;4.94E-01;2.87E-02	1305;9241;22067;38860	1.25E+00;1.21E+00;1.20E+00;1.20E+00
	Gas1	0.352455	1.24919	4	CGAGTGCCGCGCGGTCATCG;GCGCCGGTGCTAGCGCAGCG;AGCTCAACCACACGCGCCGC;GCGCGGCAGACAGGGCTCGA	-0.47;0.31;0.48;1.09	24644;65428;71061;78751	8.90E-01;5.14E-01;3.90E-01;1.93E-02	883;8573;14206;54990	1.73E+00;1.37E+00;1.26E+00;6.43E-01
	Araf	0.351838	1.243	4	GGACCTTGGAGGAACAATGC;GTGGACGTTAGGAGTAGATG;CCTCTACCACCACCTACATG;GCCTAACAAGCAACGCACAG	-0.02;0.1;0.25;1.08	49801;56254;62862;78692	8.81E-01;5.88E-01;3.83E-01;2.07E-02	942;16772;23381;29833	1.71E+00;1.34E+00;1.15E+00;7.80E-01
	Cdkn1b	0.350877	1.21021	4	AAGAAGCGAGTCAGCGCAAG;GGGCAGATACGAGTGGCAGG;GCGGATGGACGCCAGACAAG;GCTTGCCCGAGTTCTACTAC	-0.2;0.13;0.48;1.0	39140;57747;70920;78318	6.23E-01;5.88E-01;5.10E-01;2.89E-02	1316;8714;21887;40494	1.24E+00;1.22E+00;1.20E+00;1.17E+00
	Traf3ip3	0.350569	1.2952	4	TGGAGTTGCTGTCCTAGACA;GGTGCTGAGGACCCAACACA;TTACAGAAACACTCCCCCTG;GGAGTGGAAGAGTCAGTACG	-0.06;0.15;0.61;0.7	47248;58568;74083;75542	7.97E-01;6.49E-01;6.44E-01;9.16E-02	4092;5551;21067;32386	1.60E+00;1.56E+00;1.26E+00;7.56E-01
	Taar3	0.350482	1.20462	4	ACCAAACGAAAAGAGAGCTG;GGTACATTATCATGCGGACA;ATAAAACCGGTCGATCGCGA;GCATCATGTCGAAGCTCGCG	-0.1;0.02;0.28;1.2	45170;51875;64498;79073	7.35E-01;5.10E-01;3.94E-01;1.23E-02	561;15136;27760;34464	1.56E+00;1.45E+00;9.57E-01;8.47E-01
	Brinp3	0.350432	1.44494	4	TGTTCTCCAGTTGTTCGTAG;TTCTTCGAATAACAGAAACA;GGAAGGGTCCCTTATCAGAG;CCTGACAACCGTACCCGGTG	0.19;0.27;0.46;0.49	60356;63745;70354;71362	1.37E+00;8.15E-01;4.93E-01;1.91E-01	8271;9280;15889;19278	2.46E+00;1.59E+00;1.20E+00;5.24E-01
	Eme1	0.35031	1.29425	4	GCAGGAAGGAAAACACCCCG;ATGTGATCCTCTCAGCTAGG;GTGACTGGAAAAGGCAACCA;GCCTACAACTTAAAGCAGGT	-0.3;0.37;0.53;0.79	33820;67858;72291;76715	1.02E+00;5.59E-01;4.90E-01;6.49E-02	2919;7343;11776;45814	1.96E+00;1.38E+00;9.60E-01;8.82E-01
	Dio3	0.349876	1.28204	4	CGTCTGATACGCATATGGGC;GCATCCTCGACTACGCACAA;TGGCCTCTCTCAAAGCCGTG;CTCATCCGCGCCATGAACGG	0.08;0.1;0.29;0.93	55067;56285;64543;77901	1.09E+00;5.89E-01;3.94E-01;3.82E-02	1733;15091;23349;24567	2.04E+00;1.15E+00;1.09E+00;8.49E-01
	Hsf2bp	0.348514	1.33929	4	GATGTTGCCGCCATTGCGTG;CTTACCCAGAATACTAAATG;AAACTGCACAGGCAGACAGT;GTCGTCAAAACCATTCTAGG	0.08;0.09;0.58;0.65	55344;55414;73355;74692	1.10E+00;6.08E-01;5.71E-01;1.11E-01	4942;6279;24220;24290	2.06E+00;1.50E+00;1.11E+00;6.89E-01
	Dab1	0.347965	1.21989	4	GGGGAGAGGTTATATCAGGA;TTTCGGATACGTTTGCGGGA;GGTATCACCTGAGCGACGGG;GATGAAGTGTCCGCAGCTCG	-0.39;0.28;0.39;1.1	29042;64365;68524;78789	8.41E-01;4.49E-01;4.27E-01;1.85E-02	845;11110;15269;50592	1.64E+00;1.39E+00;1.06E+00;7.88E-01
	Krt20	0.347771	1.33849	4	AGGAAGTTGAGGTTCTTCGC;GTAGGAGCTATAGTCTCGGA;GAGGGGAATGCGTATAGCTG;CAAAGCCGTAATGAGCTACG	-0.1;0.39;0.46;0.64	45101;68330;70540;74605	1.05E+00;7.33E-01;4.98E-01;1.13E-01	5029;9094;11304;34533	2.01E+00;1.45E+00;1.21E+00;6.83E-01
	Cdc27	0.347548	1.28864	4	ACTGGTCGAAGTTTATTAGG;ACAGAGTGGAAATAGTCGAG;CAGGTATTTACACTGTGGGG;ACTCCTCTATCATTTCAGAA	-0.83;-0.24;0.76;1.71	10344;37008;76286;79546	8.30E-01;4.66E-01;4.30E-01;1.90E-03	88;3348;42626;69290	2.36E+00;2.01E+00;5.45E-01;2.42E-01
	Tmem242	0.347534	1.50561	4	ACTCTCTGGTAAGGCAGCCG;CCTCTGAATTAGAAGCTCCA;AAACCTTATTGAACCACTCA;TCCAGCTAGCATTCCCGCTG	0.24;0.34;0.37;0.44	62535;66791;67824;69846	1.51E+00;9.60E-01;4.36E-01;2.28E-01	9788;11810;12843;17099	2.67E+00;1.85E+00;1.02E+00;4.79E-01
	Spty2d1	0.347509	1.30391	4	TTGTTGTGTGAGAGAACCGT;ACCCAGCCCTCACTTCGGGA;AGTTTCTTGAACGAAAGCAT;AAAAGTGAAAGGTGTCCAGT	-0.02;0.3;0.36;0.75	49490;65280;67340;76203	8.83E-01;8.70E-01;4.28E-01;7.65E-02	3431;12295;14354;30142	1.72E+00;1.69E+00;9.90E-01;8.21E-01
	Fgf17	0.347069	1.32288	4	AACCAGTACGTGAGGGACCA;TCGCATCTCTGCCACCGCAG;CTCTGCTGTCAAACACAGGT;GTGAATACCAGCTCTACAGC	-0.56;0.38;0.67;0.89	20543;68144;75043;77645	1.04E+00;7.15E-01;3.75E-01;4.39E-02	1989;4591;11490;59091	1.99E+00;1.75E+00;1.03E+00;5.18E-01
	Emc7	0.346768	1.33669	4	CGATCTTAAAACGATCTCCC;TTACATCAAAACGTCAGAAG;TTTATTAAGAGGGAATCGTG;TTCCACTACATAAGAGCCAG	-0.04;0.27;0.57;0.58	48502;64005;73241;73495	8.37E-01;8.26E-01;6.02E-01;1.39E-01	6139;6393;15629;31132	1.63E+00;1.61E+00;1.49E+00;6.15E-01
	Ier5l	0.346541	1.28481	4	CACCAACACCCGGCGCCCAG;GCACCAGCACCTCGCTTACG;GCGCGCGTTGCGGAGCACGT;AGTGCACGCCGAAGTCCGAG	-0.3;0.26;0.68;0.74	33834;63676;75222;76049	8.12E-01;7.29E-01;4.90E-01;8.00E-02	3585;4412;15958;45801	1.78E+00;1.59E+00;9.61E-01;8.05E-01
	Fam183b	0.34636	1.20118	4	ACTCTTTCTCAAAGAGCTAC;AAGTTATCATGCCAAGACAT;CTCATTCACCATGCTGCACA;GCCAGCTCACCCTTGCGCAG	-0.12;-0.11;0.44;1.18	43868;44732;69904;79033	7.00E-01;4.81E-01;4.39E-01;1.31E-02	601;9730;34902;35766	1.53E+00;1.39E+00;1.16E+00;7.23E-01
	Fasn	0.34625	1.28314	4	ACTGGCAATCTGATTGTGAG;TTGGTGGAGCCAATTAACAG;CTACCAGGCCATCCGTAGTG;TGTCTCCGAAAAGAGCCGGG	-0.04;0.29;0.32;0.81	48715;64599;66025;76909	8.52E-01;8.44E-01;4.09E-01;6.05E-02	2725;13609;15035;30919	1.66E+00;1.64E+00;9.19E-01;9.09E-01
	Rhpn2	0.346196	1.42613	4	ACTCGTTCTGGATCCCCGGG;CCCAATGTTGAAGAGAACGC;AGAGAACATCCCGTATTCGT;ATCTCCGTGGGAGTGTACCA	0.16;0.27;0.47;0.48	58901;64089;70744;71138	1.28E+00;8.30E-01;5.04E-01;1.96E-01	8496;8890;15545;20733	2.34E+00;1.62E+00;1.23E+00;5.17E-01
	Slc25a38	0.346002	1.27318	4	AGAGGAAAGCCTTAATCACT;AGTGATCAAGACACGCTATG;TCCAGGGACACATCTCACAA;CTGAGAAGGGGGCATCACGG	-0.26;0.31;0.57;0.77	35934;65346;73178;76460	8.86E-01;5.99E-01;5.25E-01;7.06E-02	3174;6456;14288;43700	1.72E+00;1.48E+00;1.04E+00;8.50E-01
	Olfr1428	0.345885	1.27248	4	ATGTAAACCACCACCCACCC;TTTCTGATAAAAGATCCACC;GCTGGGAAACACCCTCATTG;TTACTGTGATGTACCCCAGG	-0.06;0.15;0.56;0.73	47615;58381;72988;75992	8.08E-01;6.39E-01;5.90E-01;8.13E-02	3642;6646;21253;32019	1.58E+00;1.45E+00;1.25E+00;7.99E-01
	Timm8a2	0.345107	1.30782	4	AGAAGTGCATGGACAAGCCC;AGCAGAGCTCTGTCATGTGG;TCACCAAGCAGAGCTCCGCC;AGTCCGCCTGGTCTTCCCGG	-0.24;0.42;0.45;0.74	37272;69454;70231;76107	1.13E+00;5.50E-01;4.89E-01;7.87E-02	3527;9403;10180;42362	2.14E+00;1.19E+00;1.10E+00;8.11E-01
	Plxdc2	0.345007	1.18773	4	ACTCTCAAGCATACAACCAC;GCAGTTGAAACCAATCTGCG;ACAACCCGACTTTCACTGGA;CCGGTTCCAGTTCGCCCACG	-0.15;0.08;0.3;1.15	42167;55207;65029;78947	6.56E-01;5.67E-01;3.99E-01;1.50E-02	687;14605;24427;37467	1.47E+00;1.31E+00;1.10E+00;8.71E-01
	Olfr251	0.344602	1.32056	4	GCTCACAAGCTCGTTGACAT;CATAAACCCTGTATGAGTCA;GCTCAGGTTTCCTACCACAG;TTTCTAACCCCACAATGCTG	0.01;0.29;0.41;0.67	51686;64557;68958;75029	9.50E-01;8.50E-01;4.58E-01;1.03E-01	4605;10676;15077;27947	1.82E+00;1.66E+00;1.09E+00;7.13E-01
	Ncor2	0.344459	1.27079	4	TACCGACTGAGCCCCCACGC;GCCATCTCGACTGTCCAAGG;GCTACCACACCCTCGTGAGT;GCATAGAGAACAATCCGCGA	-0.32;0.36;0.51;0.83	32435;67428;71821;77068	9.95E-01;5.41E-01;4.70E-01;5.69E-02	2566;7812;12206;47199	1.91E+00;1.33E+00;9.32E-01;9.09E-01
	Cxcl3	0.344421	1.39801	5	GCACTGAGGAGCCGGCAGGT;GCAGGACCAGTGCAGCACTG;GTGCCTGAACACCCTACCAA;ACTTCTGTCTGGGTGCAGTG;GAATCCCACCTGTAGCCTGG	0.02;0.03;0.24;0.47;0.95	51972;52544;62852;70824;78060	1.32E+00;7.66E-01;6.61E-01;4.61E-01;4.33E-02	1574;8810;16782;27090;27662	2.30E+00;1.35E+00;1.23E+00;1.07E+00;1.04E+00
	Dnajc5g	0.344177	1.26986	4	CCCAGCGACTATCTAGAACT;AGGGTCGGTGAGTATGGCAT;AAGAAGATCTATGACCGGCA;CTTGTCTGGATGATATTGCA	-0.29;0.01;0.82;0.83	34244;51401;77045;77099	9.29E-01;5.03E-01;4.97E-01;5.62E-02	2535;2589;28233;45390	2.23E+00;9.77E-01;9.39E-01;9.37E-01
	Apold1	0.344122	1.25882	4	GCTGAGTGACAACCCCACGA;CACGGCCGACGCCACGAGCG;GGATTGCTGCTGGACCGCCG;GCTACGCAGGCGCTCCCTGG	-0.06;-0.01;0.64;0.81	47354;50121;74558;76874	8.00E-01;6.79E-01;4.86E-01;6.13E-02	2760;5076;29513;32280	1.67E+00;1.57E+00;9.04E-01;8.92E-01
	Tas2r122	0.343707	1.21282	4	TGAAATACATGAGTGTGCCT;AAATGAGAATCCCATTGTAG;ACAGGCTATGCATAAATAGT;GTTCTATGGACAACAATTGC	-0.34;0.29;0.33;1.1	31269;64662;66160;78803	8.54E-01;4.54E-01;4.11E-01;1.82E-02	831;13474;14972;48365	1.67E+00;1.39E+00;9.26E-01;8.66E-01
	St7	0.343672	1.18004	4	AATCCACTGAATCTGTTTAG;CTCAGCAGCTACAACATCAT;ATATTGAACATGCTTAGGAG;GTTAACCCCAAAGTTCTACG	-0.19;0.01;0.1;1.46	39598;51213;56339;79435	5.97E-01;5.00E-01;3.83E-01;4.32E-03	199;23295;28421;40036	2.00E+00;1.19E+00;9.32E-01;5.90E-01
	Osbpl9	0.343523	1.30061	4	GTTCCGAATACTGTACCTGG;TTACTCTATTAAGCGCTTTG;CTTCTCTCGAGAATAAACGT;TGTGATTGGTATAGACGACG	-0.09;0.32;0.47;0.68	45474;66063;70673;75170	9.21E-01;7.44E-01;5.02E-01;1.00E-01	4464;8961;13571;34160	1.78E+00;1.47E+00;1.22E+00;7.24E-01
	Epop	0.343241	1.32108	4	ACGCCCCTGAAGCCGCGTCG;GACGTCGCGGTGTGCCCAGG;TCTGCGCCCTTGCCAAACCC;GAGGTGCTTCAGGCCGTCCG	0.07;0.22;0.42;0.67	54510;61622;69384;75011	1.07E+00;7.36E-01;4.68E-01;1.04E-01	4623;10250;18012;25124	2.00E+00;1.45E+00;1.12E+00;7.12E-01
	R3hcc1	0.34318	1.20373	4	AAATGAGCCACAGATGGGGT;GTACCTGATCCATCGAACGG;CGGGTGCTACGCAGGCAAGG;CCCTGATGTGAGGTATACCG	-0.27;0.2;0.47;0.97	35496;60908;70856;78145	7.12E-01;5.18E-01;5.08E-01;3.28E-02	1489;8778;18726;44138	1.40E+00;1.24E+00;1.15E+00;1.03E+00
	Tcf21	0.343055	1.18753	4	GGGTCTCCACAGAAGGGTCG;ACGCGGCCAATGCTCGTGAG;AACTTCCAACGAGAGCACCG;ACTAAGAAAAGCCCGCTCAG	-0.1;-0.07;0.32;1.22	45436;46951;65772;79109	7.43E-01;4.54E-01;4.06E-01;1.15E-02	525;13862;32683;34198	1.59E+00;1.47E+00;9.07E-01;7.88E-01
	Zg16	0.343022	1.18133	4	ACAGTGTGGAGTGACTATGT;TCACTTACTGGAATTAGCAG;TCTGTTGACCCGGATACGGA;GGAGATCTTTCTGCACCCCG	-0.38;0.14;0.48;1.14	29299;57844;71085;78898	6.25E-01;5.15E-01;4.30E-01;1.61E-02	736;8549;21790;50335	1.44E+00;1.26E+00;1.23E+00;7.97E-01
	Aste1	0.342616	1.25768	4	GTCTACCCCTTAGTTCTAAG;AAAGCATCACTGATGAAAGG;AGTCAGAATTGAAGCAAAGT;TCACTATCCGATGATAGCAC	-0.04;0.23;0.34;0.83	48436;62435;66873;77107	8.35E-01;7.64E-01;4.21E-01;5.60E-02	2527;12761;17199;31198	1.63E+00;1.50E+00;9.64E-01;9.38E-01
	Rsrc1	0.342556	1.27588	4	GAAGTGCACAGCATCAAACG;AGAAGTCGCAGTCGTTCCAG;CTGCTTCTACTATGTGAGCG;CAGGACCTTGAGTCGGACCT	0.07;0.08;0.11;1.11	54711;54982;56447;78829	1.07E+00;5.62E-01;3.82E-01;1.76E-02	805;23187;24652;24923	2.02E+00;1.41E+00;1.09E+00;5.92E-01
	Npy5r	0.342145	1.26916	4	CTTACTGTTAAACATACTAG;CAAATGTATAGAGCCCAATC;AGTATTTGTGTGTTGAGTCA;CCACTGATCCAACAAGACAG	-0.42;0.33;0.6;0.86	27066;66441;73828;77326	9.41E-01;6.34E-01;4.08E-01;5.11E-02	2308;5806;13193;52567	1.82E+00;1.56E+00;9.74E-01;7.22E-01
	Cltc	0.34208	1.27756	4	AAGCAACACAAGCCAGATGG;GCTGTGCGGAACAACTTAGC;ATAACCACAGGAAGTCGACT;GATGTTCACCCACTATGACC	-0.38;0.35;0.59;0.81	29508;66944;73667;76842	9.68E-01;6.25E-01;4.32E-01;6.20E-02	2792;5967;12690;50126	1.87E+00;1.54E+00;9.00E-01;8.04E-01
	Sdc4	0.341962	1.32069	4	TCAGGGATGTGGTTATCCAG;CAGCATCTTCGTCGTCGGGG;TTCTTAGATTCGAGAGACAG;GGACATGTCATCCCCCACGT	0.11;0.2;0.34;0.72	56542;60943;66532;75846	1.16E+00;7.13E-01;4.16E-01;8.46E-02	3788;13102;18691;23092	2.15E+00;1.40E+00;9.46E-01;7.84E-01
	Tshb	0.341958	1.236	4	CACGTACATTGTATACTCAG;AGACTTCATCTACAGAACGG;AGGAGAAATAAGGAGTAACA;GTGCTGGGTATTGTATGACA	-0.08;0.23;0.27;0.94	46549;62240;64009;77968	7.76E-01;7.57E-01;3.90E-01;3.67E-02	1666;15625;17394;33085	1.53E+00;1.49E+00;1.10E+00;8.26E-01
	Olfr772	0.341223	1.83213	8	AGAGGTCAGTAAAAAATACT;CACAAGTCTTCTGCAGACTG;AGAACTGCAGATTTAGGCCA;CTATGTTATACAGGTATCTG;TCCAGAAATGCTCAGTGAGT;AGAATTCAGTTACGCCAAAG;GTTCTTAAGGAAATAGTACA;GGTGAGGATCCACTAAGATG	-0.12;-0.08;0.08;0.15;0.47;0.71;0.71;0.81	43869;46512;55014;58768;70849;75590;75649;76886	1.79E+00;1.38E+00;1.31E+00;1.28E+00;1.28E+00;1.01E+00;5.54E-01;1.22E-01	2748;3985;4044;8785;20866;24620;33122;35765	2.78E+00;2.25E+00;2.19E+00;2.00E+00;1.93E+00;1.56E+00;1.29E+00;6.66E-01
	Olfr773	0.341223	1.83213	8	AGAGGTCAGTAAAAAATACT;CACAAGTCTTCTGCAGACTG;AGAACTGCAGATTTAGGCCA;CTATGTTATACAGGTATCTG;TCCAGAAATGCTCAGTGAGT;AGAATTCAGTTACGCCAAAG;GTTCTTAAGGAAATAGTACA;GGTGAGGATCCACTAAGATG	-0.12;-0.08;0.08;0.15;0.47;0.71;0.71;0.81	43869;46512;55014;58768;70849;75590;75649;76886	1.79E+00;1.38E+00;1.31E+00;1.28E+00;1.28E+00;1.01E+00;5.54E-01;1.22E-01	2748;3985;4044;8785;20866;24620;33122;35765	2.78E+00;2.25E+00;2.19E+00;2.00E+00;1.93E+00;1.56E+00;1.29E+00;6.66E-01
	Kif1bp	0.341033	1.29881	4	AGGAGAAAGTGAGATACTTG;CGTTGATGGCCCACTCCATG;TCTGATCTCCAGAATAACCT;AAATGCTCAGTCGGGTCAAG	0.07;0.13;0.47;0.7	54426;57706;70741;75476	1.06E+00;6.22E-01;5.04E-01;9.31E-02	4158;8893;21928;25208	2.00E+00;1.23E+00;1.22E+00;7.50E-01
	Hcfc1r1	0.340702	1.23607	4	GCCACCACTGGGGTAACTCG;CTTGTGCAAAGGTTCCCTGG;GCCCGTGGGTCCCGACTTGG;GCTGAGTCGGGAGAAATGGG	-0.09;0.17;0.48;0.81	45648;59448;70947;76883	7.49E-01;6.68E-01;5.11E-01;6.11E-02	2751;8687;20186;33986	1.48E+00;1.31E+00;1.25E+00;9.05E-01
	Rgs20	0.340474	1.32041	4	ACTTCTTCCAGAGTAGGCGT;CGGATGCGGCAGATGTGCGG;AGAAAACATGCTCTTCTGGA;GCCAGGTACTTACCAGGCCA	-0.55;0.49;0.5;0.92	21013;71183;71558;77852	1.27E+00;5.31E-01;3.76E-01;3.93E-02	1782;8076;8451;58621	2.37E+00;1.30E+00;1.08E+00;5.32E-01
	Agk	0.339967	1.23227	4	ATATTGCAGACGGATTATGA;GAAATACCCTTTGCAAGCTG;CTCTGAAAGATCCCCACCGG;AGTACTGAGAAGAACAGATG	-0.08;0.18;0.41;0.84	46555;60149;69022;77193	7.76E-01;6.88E-01;4.60E-01;5.41E-02	2441;10610;19485;33079	1.53E+00;1.35E+00;1.10E+00;9.52E-01
	Ube3c	0.3399	1.34353	4	GAGCTATACGTAAAGTGCAA;GACATGTGTGGCGATTCCGG;ACACTCTTCAGTAATATATG;GTTTGACCAATGCACTGACT	-0.21;0.44;0.53;0.59	38751;70028;72338;73672	1.17E+00;5.79E-01;5.61E-01;1.35E-01	5962;7296;9606;40883	2.21E+00;1.38E+00;1.16E+00;6.25E-01
	Pgam2	0.33982	1.24428	4	AACCAAGAGAACCGTTTCTG;GTTTGACATCTGCTACACGT;GCTTCAAGCCTGCATAGCGG;GGATGTTACGGACCAAATGT	-0.21;0.13;0.68;0.77	38709;57345;75176;76416	7.25E-01;6.13E-01;5.79E-01;7.16E-02	3218;4458;22288;40925	1.78E+00;1.20E+00;1.16E+00;8.45E-01
	Nup37	0.339609	1.29389	4	GGAAACCTGATTGCATATGG;GAGTGTATGCTGGCATCCCG;TTGCGAAGATTATGTGCACG;TCAACTTACTTGATTACAGG	-0.39;0.38;0.61;0.76	28861;67968;74036;76313	1.03E+00;6.46E-01;4.25E-01;7.40E-02	3321;5598;11668;50773	1.97E+00;1.59E+00;8.33E-01;7.82E-01
	Olfr651	0.339231	1.23732	4	ATAATCTTGACAATCACCTG;ATATAAACATGGGCTCGTGA;GTGAGCATATAGGTGTTGCA;TTTCTTGGGACCCAAACCAA	-0.2;-0.1;0.74;0.91	39511;45395;76073;77754	8.07E-01;5.95E-01;4.43E-01;4.15E-02	1880;3561;34238;40124	1.96E+00;1.19E+00;1.06E+00;7.42E-01
	Aven	0.339228	1.20472	4	TTCACAGTTCCGATTTGCTG;CTAGAATTCAGCACTCTACG;GAGCTGGGCATGCATTTAAG;ATTCTGAAGCAACATTAAGC	-0.38;0.23;0.52;0.99	29283;62115;72140;78259	7.53E-01;5.53E-01;4.30E-01;3.02E-02	1375;7494;17519;50351	1.48E+00;1.36E+00;1.18E+00;7.96E-01
	NO_CURRENT_191	0.339209	1.30129	4	GCTTATCGTCATGCGGGTGA;GCTTATCGTTCCGCTACGAT;GCTTCATTATTAACCGGCGT;GCTTACCTACTCCGCCCCGC	-0.04;0.22;0.56;0.61	48538;61938;73030;74022	8.38E-01;7.47E-01;5.92E-01;1.27E-01	5612;6604;17696;31096	1.63E+00;1.47E+00;1.46E+00;6.45E-01
	Ces2b	0.339135	1.19003	4	GGACATGGGGGACACAACAT;ACACATACAGGACAGGTCCG;GCCACCTGTCTCTACGTCCG;GTTTGGTTGGACCATTCCTG	-0.31;0.24;0.26;1.16	33196;62776;63524;78978	7.77E-01;4.81E-01;3.86E-01;1.43E-02	656;16110;16858;46438	1.52E+00;1.49E+00;9.37E-01;8.06E-01
	Cers6	0.338943	0.947077	2	ATGTTCGGAGCATTCAACGC;TGTCTTGTATTCCACAACCA	0.09;0.59	55725;73530	3.77E-01;6.93E-02	6104;23909	1.05E+00;8.49E-01
	Pus7l	0.338322	1.33412	4	AGCAATCACCTATCAATCGA;CGGTCACCATCCGAGCACCC;GATTCCGGGAAAAAGCACGC;GTTATCGAGATCGATGAACA	-0.02;0.35;0.44;0.59	49534;66884;69959;73590	9.65E-01;8.72E-01;4.82E-01;1.37E-01	6044;9675;12750;30100	1.86E+00;1.69E+00;1.17E+00;6.21E-01
	Rab19	0.338097	1.32358	4	CAGGGAACAAATCAGACCTG;TTATTGGGGACTCCAACGTG;TTTCTTGCCGTCTATCTCGA;TCGCTTATGATCTCACACGG	-0.65;-0.23;0.94;1.3	16657;37358;77977;79259	1.11E+00;4.29E-01;3.83E-01;8.18E-03	375;1657;42276;62977	2.60E+00;1.73E+00;5.52E-01;4.08E-01
	Usp15	0.338094	1.28096	4	GAAGATGGAACGTGGCCCAG;ATGAACTCAGCCATTCAGGT;GTTTGAAATTAACATCAACA;ACCGAGATCTTAGCACACTC	-0.04;0.1;0.63;0.66	48550;56211;74411;74834	8.39E-01;6.70E-01;5.87E-01;1.08E-01	4800;5223;23423;31084	1.65E+00;1.63E+00;1.14E+00;6.99E-01
	Ms4a8a	0.338049	1.18439	4	GGCCAATTCTGTATATGTGG;ATAAATAGGCATCTGAGGCA;AGAATATGACTTACCAGGCA;GAAAAAGGGACAAGTCCTAG	-0.23;0.07;0.53;0.98	37651;54754;72363;78196	5.62E-01;5.58E-01;5.57E-01;3.16E-02	1438;7271;24880;41982	1.38E+00;1.17E+00;1.11E+00;1.08E+00
	Uqcr11	0.337479	1.38086	4	CAGGATCAGCCGCCAGTCCG;CTGGCCAGTTCCCGGTAGCG;CCTACCAGGATTCCCACAGC;GAACTGGCCAGAAACTGGTG	-0.79;0.03;1.03;1.09	11731;52332;78478;78736	1.26E+00;5.16E-01;4.37E-01;1.97E-02	898;1156;27303;67903	2.91E+00;1.36E+00;9.75E-01;2.77E-01
	Slc6a8	0.336908	1.28532	4	GGAAGCGCCACACGTTACCG;GCATCAGTGTGACAGCCCGT;ACTCGATGACAGGGGACCGG;GCACAACGAGGACCACGTAG	-0.24;0.4;0.46;0.73	36972;68830;70438;75903	1.08E+00;5.44E-01;4.95E-01;8.33E-02	3731;9196;10804;42662	2.06E+00;1.20E+00;1.08E+00;7.90E-01
	Zfp442	0.336794	1.82212	8	ATACATAAAAGAACACATGG;GAACTTCACTCAGGAAGAGT;AAGATAACTTTGAAGTACAA;ACTGTTAAATGTAAGCAAAG;CCCTATGAATGTAAGCAATG;CGTATCAGAGCCATCCTCAG;AAAGCCTTTGGGTTTCAAAG;AAATCCTTTGCATGTCAGAG	-0.72;-0.02;0.24;0.3;0.49;0.68;0.71;1.02	14073;49754;62663;64912;71211;75143;75697;78461	1.92E+00;1.52E+00;1.44E+00;1.42E+00;1.20E+00;5.57E-01;4.41E-01;5.15E-02	1173;3937;4491;8423;14722;16973;29880;65561	2.79E+00;2.28E+00;2.25E+00;2.18E+00;2.12E+00;1.30E+00;9.74E-01;6.76E-01
	Neu1	0.336753	1.28188	4	ACAGCCTTCATCGTAGACGA;TGTGTGTGGACACGGGACGC;GAAAAAATCTGCATCCGATG;TTGGTTTGGAGTAAGGACGA	-0.01;0.08;0.62;0.66	50095;55196;74129;74901	8.91E-01;6.52E-01;5.66E-01;1.06E-01	4733;5505;24438;29540	1.72E+00;1.60E+00;1.10E+00;7.04E-01
	Trappc4	0.336569	1.21786	4	TGGAAACCGGGTAATTCGCA;AACTTACGAGTGGAACATCG;AATGGCAAGTACACGGCTGA;AGTGGGACAGCTATTCGCCA	-0.19;0.26;0.43;0.86	39646;63408;69513;77323	8.02E-01;5.98E-01;4.71E-01;5.11E-02	2311;10122;16226;39988	1.57E+00;1.20E+00;1.13E+00;9.74E-01
	Ankrd11	0.336469	1.36419	4	GGGAACGGCCCCATGCAGCG;GCTGGGGCACGACACTACTG;CTGATGGCACTCGAGCCGTA;GCAGGCTCTTCTCGACATCG	-0.35;0.52;0.55;0.62	31088;72048;72820;74220	1.35E+00;5.82E-01;4.51E-01;1.22E-01	5414;6814;7586;48546	2.50E+00;1.43E+00;8.60E-01;6.57E-01
	Rabl3	0.336194	1.25224	4	CAGTGTGAAAAGCACAAGAG;GTTCTCGGTCATAATCCCTG;TTAGTCCCTATTACCAACAG;AAGTGTTAGGAAATCCGTCA	0.01;0.14;0.42;0.78	51275;58126;69216;76578	9.34E-01;6.32E-01;4.64E-01;6.80E-02	3056;10418;21508;28359	1.79E+00;1.24E+00;1.11E+00;8.65E-01
	Mmp11	0.335997	1.33669	4	ACTTTCACTGAGGTGCACGA;TGATGAAACTTGGACTATTG;ACAGACCTCACCTATAGGTA;CTGTGAGACTTCCTTCGACG	-0.01;0.34;0.45;0.57	50163;66703;70135;73144	9.55E-01;8.94E-01;4.87E-01;1.48E-01	6490;9499;12931;29471	1.84E+00;1.73E+00;1.18E+00;5.98E-01
	Rfx5	0.335712	1.26864	4	ACATAATGACCGTTCTCGAG;AGAGCGTCTATGATGCCTAT;ATGGGTGTGATAAGTGATCG;TCTACCTTCAGCTCCCATCG	0.02;0.16;0.44;0.72	51763;59285;69944;75833	9.53E-01;6.63E-01;4.82E-01;8.49E-02	3801;9690;20349;27871	1.82E+00;1.30E+00;1.16E+00;7.83E-01
	Nhlrc3	0.335627	1.17387	4	CAAGGTATTAGTGTTCTCAG;AATTATATGTAGATGACACA;GCGTCAAGTGTAACGCTGTG;TCCGTCTGGATCACGGACGT	-0.38;0.12;0.54;1.07	29421;56820;72437;78666	6.01E-01;5.65E-01;4.31E-01;2.12E-02	968;7197;22814;50213	1.39E+00;1.33E+00;1.17E+00;8.01E-01
	Cd207	0.335598	1.22372	4	AGTGAACACCACCCTCAAGA;AAGGCCACGCAGATACAGAG;AGTCTTAAGATCAGAACCCA;GCCTTGAACACAAAGGTCCA	-0.11;0.02;0.61;0.83	44430;51960;73988;77064	7.15E-01;6.43E-01;5.11E-01;5.70E-02	2570;5646;27672;35204	1.58E+00;1.42E+00;9.61E-01;9.32E-01
	Trib3	0.335551	1.24661	4	AAGGCCCCAGTCGAGTTGCA;ATCTGATCCAGTCATCACGC;GAGTATCTCTGGTCCCACGT;CGGACTCTGGGATACCGCGG	-0.14;0.28;0.44;0.76	42995;64423;69793;76358	8.44E-01;6.77E-01;4.78E-01;7.30E-02	3276;9841;15211;36639	1.65E+00;1.35E+00;1.15E+00;8.38E-01
	Gprin1	0.335297	1.22473	4	GTGAATCCTGTATGCTCGGG;ACATGCAAACATCTCAAAAG;GAATCCTGTTAACTCCACAC;GCCTTGACCTCAGACAACTC	-0.57;-0.0;0.74;1.18	19884;50681;76071;79029	8.07E-01;4.93E-01;3.75E-01;1.32E-02	605;3563;28952;59750	1.96E+00;1.53E+00;9.12E-01;4.99E-01
	Cox5a	0.335114	1.15772	4	CTGCATTGCGAGCATGTAGA;CCGTCGCTGTACCGCAGCCG;CCCATGAGAATAGCAGCGAA;TGAGGAGTTTGATGCTCGCT	-0.32;0.1;0.44;1.13	32367;56157;69856;78866	5.86E-01;4.79E-01;4.69E-01;1.68E-02	768;9778;23475;47267	1.43E+00;1.16E+00;1.14E+00;9.06E-01
	Pid1	0.33506	1.28401	4	GCTCTGGAAGAAACACACAC;AGATCCGGCCATTCCAAGTG;ATGAAGGCAAGGACTCATAG;GGCAATTCGAGCCACCTGGA	0.02;0.22;0.43;0.68	51887;61593;69530;75208	9.58E-01;7.35E-01;4.71E-01;9.93E-02	4426;10104;18041;27747	1.83E+00;1.44E+00;1.13E+00;7.28E-01
	Selenom	0.334969	1.05588	3	ACAGTTGAATCGCCTAAAGG;GGCTTAACAGCACGAGTTCG;CCGAAATTACCAGGAACTAG	-0.16;0.32;0.84	41939;65907;77179	4.51E-01;4.51E-01;4.08E-02	2455;13727;37695	1.13E+00;1.06E+00;9.74E-01
	Pwwp2b	0.334665	1.31915	4	GGACCATCAAGCGGACCCGT;ACACCCCCAAACCCCGCCGG;AAGACAAGTCCTCTAGCCCA;GCAGGCACAGGTGGTATGAG	0.03;0.3;0.39;0.62	52486;64932;68530;74196	9.81E-01;8.67E-01;4.49E-01;1.23E-01	5438;11104;14702;27147	1.87E+00;1.69E+00;1.06E+00;6.56E-01
	Cotl1	0.334274	1.28318	4	AATCTGCTCCCTGATCGCCG;AGGGTGACTTTCAGATACGA;CCTCATCACATGGATCGGGG;GCGCGGCGTACAACTTAGTG	0.11;0.13;0.29;0.8	56684;57783;64747;76780	1.17E+00;6.24E-01;3.96E-01;6.34E-02	2854;14887;21852;22950	2.16E+00;1.22E+00;8.91E-01;8.58E-01
	Cyp4a29	0.334158	1.33558	4	CATGACTTCCCCATATCCAG;TCAAATCACTAACAGCCTGG;ACATCCTCAAACCCTATGTG;CAGACCGAGTTGTCAAGCTA	0.15;0.17;0.38;0.64	58726;59438;68055;74471	1.27E+00;6.68E-01;4.40E-01;1.16E-01	5163;11579;20196;20908	2.32E+00;1.31E+00;1.03E+00;6.73E-01
	Enox1	0.3338	1.1969	4	CCACAAGAGAACGACCTCCA;CATTTGGCGAAAGCACTCTG;GGGTATCATCGGGTTAATGG;ACTTCAAAAATGCCTTAACG	-0.06;-0.03;0.47;0.96	47483;49209;70655;78067	8.04E-01;5.02E-01;4.76E-01;3.45E-02	1567;8979;30425;32151	1.58E+00;1.22E+00;1.13E+00;8.61E-01
	NO_CURRENT_181	0.333483	1.2143	4	GCGCCTAGGGTTCCGACTCA;GCGCGAGGGCACCGACAAGT;GCGATTATCAGTAGTCCACG;GCGCGAGTGCCAAACGAGTG	-0.11;0.22;0.34;0.89	44756;61836;66531;77565	7.43E-01;7.24E-01;4.16E-01;4.57E-02	2069;13103;17798;34878	1.46E+00;1.43E+00;1.02E+00;9.45E-01
	Lsm2	0.332895	1.3243	4	TGTGGGCAAGGATGTAGTCG;TGGAACTCAAGAATGACCTG;CTGTGGAACCCTCCACTCTG;CAGCCCCAACTTACCATGTG	-0.56;0.46;0.61;0.82	20594;70484;74011;76982	1.21E+00;6.45E-01;3.75E-01;5.88E-02	2652;5623;9150;59040	2.27E+00;1.59E+00;9.20E-01;5.20E-01
	Arhgap26	0.332772	1.32586	4	TGATTTGTTTGGAATCCCGT;CCTTGGCCAGCTCATAACCA;GGGGCTCTACCGAATCGTGG;TGAAACTGGTACATCATGAG	0.08;0.25;0.39;0.61	55182;63175;68465;73942	1.10E+00;7.92E-01;4.48E-01;1.29E-01	5692;11169;16459;24452	2.05E+00;1.55E+00;1.06E+00;6.40E-01
	Dact3	0.33248	1.25354	4	CCAAGTGGACGCGTACCGTG;CAACCGCGCACAAGTCCCGG;GCTTACGCGAGGTCGCAGTG;GAAGACCCCAGTTCTACTGG	-0.44;-0.0;0.87;0.9	26259;50626;77428;77713	9.92E-01;4.92E-01;4.01E-01;4.24E-02	1921;2206;29008;53375	2.36E+00;1.05E+00;9.10E-01;6.95E-01
	Fut1	0.332083	1.28371	4	GCGTCGTGGAGACTATCTGG;GCAGGTTTGGTAACCAGATG;TCGGGCCCGGAACCAGTCCA;TCTTCGGGAACAGATTCGTA	-0.3;0.39;0.55;0.69	33859;68436;72661;75317	1.06E+00;5.75E-01;4.91E-01;9.68E-02	4317;6973;11198;45775	2.02E+00;1.42E+00;9.62E-01;7.36E-01
	Zfp982	0.331927	1.19391	4	CATTTCATATGTGCAAAGTG;GGCCGTGGAATTCTCACTGG;TTTGTGAGGTACACAATGGG;CTGAAAAACGCAAACTGAGA	-0.11;0.13;0.4;0.9	44628;57798;68726;77718	7.20E-01;6.24E-01;4.53E-01;4.23E-02	1916;10908;21836;35006	1.43E+00;1.22E+00;1.08E+00;1.05E+00
	Lzts1	0.331704	1.35669	4	ATCCTCTGGTCACCCCCGTG;GGAGAGTGGGGAACGCACAC;CCAAGCTGAGGTCCTACGAG;AGCTCAATCGATACTCAGAT	0.13;0.25;0.41;0.54	57489;62868;69122;72528	1.21E+00;7.81E-01;4.62E-01;1.62E-01	7106;10512;16767;22145	2.22E+00;1.53E+00;1.10E+00;5.69E-01
	Lpl	0.331643	1.17763	4	TGGATTCCAATACTTCGACC;CCATCCATGGATCACCACGA;TGACACTGGATAATGTTGCT;GAAAAACGTACCGTCTGCTG	-0.08;0.04;0.3;1.08	46028;52944;64920;78705	7.60E-01;5.26E-01;3.97E-01;2.04E-02	929;14714;26690;33606	1.50E+00;1.35E+00;9.99E-01;8.66E-01
	Ucn	0.33147	1.33596	4	GAGGGGACGCGCTACGCTCC;GGAGTGCGGAATCAGGGCGG;AGCGCTCCGCTAACAGCAAG;CCGCAGGCTCAGATCCTGCG	-0.62;0.51;0.54;0.89	18008;71868;72458;77623	1.33E+00;5.66E-01;3.78E-01;4.44E-02	2011;7176;7766;61628	2.48E+00;1.39E+00;1.03E+00;4.45E-01
	Nifk	0.331426	1.20006	4	AAGCGCTATAATCGGAAACG;GGCCCAGATAAACTACTCCA;AGGCTCTGACGCAGATCCAA;TCTGCTAATGTCGCCAAACT	-0.96;-0.54;0.57;2.26	7263;21262;73173;79601	6.39E-01;5.99E-01;5.63E-01;6.98E-04	33;6461;58370;72371	2.78E+00;1.48E+00;3.76E-01;1.66E-01
	4930452B06Rik	0.331334	1.40485	4	CTGGCAGACGGAATAACCTA;TGGATATTTCCTGAGAGCGG;GCTTCGTGGAATAATATCTG;TTACGCTGGATCATGAAGAG	-0.77;0.42;0.83;0.85	12262;69393;77078;77251	1.12E+00;9.34E-01;4.28E-01;5.28E-02	2383;2556;10241;67372	2.24E+00;2.13E+00;9.61E-01;2.90E-01
	Gm648	0.331098	1.27799	4	GAAAAATTATACTCTGGACA;TTCCCCCCACAACTGTGTCG;TCTGAGAATCTCCTGGCATG;GGTCTCAGTGAGGAAACATA	-0.13;0.36;0.41;0.68	43755;67335;68968;75232	9.90E-01;6.97E-01;4.58E-01;9.88E-02	4402;10665;12300;35879	1.90E+00;1.39E+00;1.09E+00;7.29E-01
	Dact1	0.330962	1.18955	4	TGGTCAAGGCCGCCTCCAAG;AAGTGACCTGAGACTGGATG;CCAGGAACTTCTCCTCCAGG;GCGTACCCGCGAGCGCCAGG	-0.68;0.19;0.39;1.41	15760;60553;68551;79399	7.01E-01;4.50E-01;3.89E-01;5.11E-03	235;11083;19081;63874	1.93E+00;1.38E+00;1.06E+00;3.83E-01
	Cdpf1	0.330837	1.18652	4	CAGAAACCTGGCCTTGTCTG;GAATACTCACACAACAGCCT;CAGCTCCTTACAGCTATGTG;TGGCACTCAAACGTGCCCAG	-0.22;0.19;0.47;0.89	38038;60329;70742;77599	6.94E-01;5.65E-01;5.04E-01;4.49E-02	2035;8892;19305;41596	1.36E+00;1.23E+00;1.13E+00;1.02E+00
	Gstk1	0.330427	1.20218	4	ATGATCCCAGCGATTAAAGT;GCTCCATGCTTACAGTGGTG;GGTTCCCCTCAACATACCCA;CCTGCTATGGTTCCCCGAAA	-0.25;0.15;0.6;0.82	36477;58615;73744;77035	6.45E-01;6.29E-01;5.35E-01;5.76E-02	2599;5890;21019;43157	1.55E+00;1.27E+00;1.06E+00;9.27E-01
	Mmp1b	0.330118	1.24147	4	GAAGTGGACCGACAACAATG;GATGCTATAATTACATATCG;CAAATGTGTAGAGGTCACCA;TTACTCACAACAATCCTCGT	0.0;0.19;0.31;0.81	51054;60464;65621;76941	9.26E-01;6.98E-01;4.05E-01;5.97E-02	2693;14013;19170;28580	1.78E+00;1.37E+00;9.14E-01;8.99E-01
	Hoxb7	0.3299	1.15251	4	TGGAGCGAAAACCGAACTTG;GTAGGGCCTGACCGAAAGCG;GGAGTACAGACCCTGCACCG;CGCCCGGACACACCCCGGAG	-0.45;-0.03;0.56;1.24	25629;49344;72940;79149	5.88E-01;4.77E-01;3.96E-01;1.06E-02	485;6694;30290;54005	1.62E+00;1.45E+00;8.65E-01;6.75E-01
	Slc25a15	0.329879	1.2032	4	GCCCATGGTAGAAGCCCAAG;GGACAGCACTTACTTCTGAC;ACCTTTCCAGACCTCTACCG;GCACAGCATGCGTACTGACT	-0.09;0.17;0.39;0.85	45525;59454;68460;77287	7.45E-01;6.68E-01;4.48E-01;5.19E-02	2347;11174;20180;34109	1.47E+00;1.31E+00;1.06E+00;9.67E-01
	Fam219a	0.329844	1.20327	4	CGAGACTGTGACGCCCGGGA;CGGCTGCATCTCCGAGTGCG;TCGGTCTGAGATAGAGGCTG;TCTGTGTCAAGAGCTACCAG	-0.21;0.11;0.61;0.81	38837;56628;73947;76907	6.41E-01;5.97E-01;5.81E-01;6.05E-02	2727;5687;23006;40797	1.58E+00;1.16E+00;1.16E+00;9.09E-01
	Slc28a3	0.329619	1.15341	4	AGTTCCGACTTGGTGACGTG;TGCAGGTGCGGACATGACCG;AAGGACACGCCAAACAGGTA;TCTGTGGAAGTTTATCGCAC	-0.49;0.17;0.22;1.42	23552;59584;61982;79401	6.72E-01;3.84E-01;3.79E-01;5.07E-03	233;17650;20050;56082	1.94E+00;1.32E+00;7.48E-01;6.09E-01
	Adh1	0.329529	1.27472	4	CCTTCGCGCAAAGTCCCCCG;TCACAAACCCTTCACCATCG;CTGCCGCTCAGACGATCACG;GGGGTGACTTGTGTGAAACC	0.08;0.16;0.33;0.74	55347;58963;66363;76136	1.10E+00;6.54E-01;4.14E-01;7.80E-02	3498;13272;20671;24287	2.06E+00;1.29E+00;9.37E-01;8.14E-01
	Klhl18	0.329491	1.37631	4	CGGACACATGGACCCGAGTG;GCGATGGACGTGCAGCATCG;TATGTTTACGAACGACATGA;GCTATGCGACGTGACGCTAA	0.17;0.27;0.33;0.55	59435;63933;66317;72753	1.31E+00;8.23E-01;4.13E-01;1.57E-01	6881;13317;15702;20199	2.38E+00;1.61E+00;9.34E-01;5.79E-01
	NO_CURRENT_248	0.329376	1.25645	4	TCAGCTACGATCGGACCCAA;TCAGCGACGCCCGGTTGACG;TCAGCTGTAGGGCATGTCAT;TCAGCTTTGCTGACACAGGT	0.03;0.16;0.4;0.73	52470;58916;68735;75977	9.80E-01;6.53E-01;4.53E-01;8.16E-02	3657;10899;20718;27164	1.87E+00;1.28E+00;1.08E+00;7.97E-01
	Tomm70a	0.328381	1.15479	4	ACAACCTATGCTGTCTACTC;GCCAGCGCCACGTGCCATCG;CAGTGAACGGAAGACCCCCG;AGTGGCCCAAGATTGTACAA	-0.42;0.19;0.34;1.2	27468;60352;66766;79074	6.95E-01;4.19E-01;4.11E-01;1.22E-02	560;12868;19282;52166	1.56E+00;1.37E+00;9.58E-01;7.35E-01
	Ndufa6	0.328208	1.29906	4	ACCTGAACGAGGCCAAGCGG;ATATCACGGTGAAACAAGGA;GCACCTCCCGATACCAAGCG;ACTGAAAATGGGCTTCACCG	0.09;0.24;0.27;0.71	55783;62606;63846;75701	1.12E+00;7.71E-01;3.89E-01;8.80E-02	3933;15789;17028;23851	2.09E+00;1.51E+00;8.19E-01;7.70E-01
	Nxph2	0.327991	1.19126	4	AATTCTACTACTTTAGAGGG;GAGGACTGGTAATCCTTGAA;CCAGACCTGTTGAATTGTGT;AGACGGCCAATAGTGAAGAC	-0.54;0.19;0.57;1.1	21208;60255;73286;78768	6.92E-01;6.05E-01;3.76E-01;1.90E-02	866;6348;19379;58426	1.49E+00;1.38E+00;1.36E+00;5.38E-01
	Akr1a1	0.327891	1.24384	4	AAGGCCAGTGCATCAAATAG;GAATACTAAGCACCACCCTG;TCACTATAAAGAGACCTGGA;CAATGAAACTGAGATTGGGG	-0.11;0.15;0.6;0.67	44619;58501;73919;75023	7.20E-01;6.42E-01;6.39E-01;1.04E-01	4611;5715;21133;35015	1.57E+00;1.43E+00;1.26E+00;7.13E-01
	S100a3	0.32781	1.22006	4	ATTTATTGTAGTCACACTCC;CTCCTGGAAGGTGCACACGA;GCACCTTCCAGGAGTATGCA;TAAATACAAGATCTGCCAGT	-0.06;0.09;0.52;0.76	47407;55781;72095;76281	8.02E-01;5.78E-01;5.51E-01;7.47E-02	3353;7539;23853;32227	1.57E+00;1.36E+00;1.12E+00;8.30E-01
	Zfp229	0.32773	1.40266	4	ATTCAATATATGCATCCTTG;TATAGATTTGCTCCAGATGG;GAATATCATCTATGAGCATG;AAGTTCTCTGATGCGTACTG	0.14;0.32;0.41;0.44	57944;65961;68939;70056	1.23E+00;9.16E-01;4.58E-01;2.23E-01	9578;10694;13674;21689	2.26E+00;1.78E+00;1.09E+00;4.85E-01
	Pik3r1	0.327257	1.1276	4	CTGGAAATCTGAAAAGCACG;TGGCTACAATGAAACCACTG;TCCATTAACCTTCAACTCTG;GAGCTTTATAAGGAGAGGCG	-0.43;0.05;0.35;1.34	26545;53776;66987;79316	5.40E-01;4.22E-01;4.03E-01;6.93E-03	318;12647;25858;53090	1.80E+00;1.03E+00;9.70E-01;7.04E-01
	Frmd7	0.326327	1.15924	4	CTACTACCGAAATGTCAATG;ACTGGACATAGCAAGGAAGC;TCAGGGTCAGTGTTAAAGAC;AAAGATTAACACCTTCAACT	-0.24;0.11;0.49;0.95	37111;56522;71168;78037	5.94E-01;5.47E-01;5.18E-01;3.52E-02	1597;8466;23112;42523	1.27E+00;1.16E+00;1.12E+00;1.09E+00
	Pnma2	0.326162	1.44169	4	ACAACCCTTCCATCAGTGTG;AAGAAGGGCAGACGGTCGCA;AAACTCAGTGTCCTGATTAG;CAAATGGGCCAATAACTCAG	0.24;0.28;0.35;0.44	62561;64271;67140;69789	1.51E+00;8.37E-01;4.25E-01;2.29E-01	9846;12494;15363;17073	2.68E+00;1.63E+00;9.79E-01;4.78E-01
	Rexo5	0.325826	1.24053	4	ATTCAGTGTCCTAACAAGCT;TGAGATCCAAGTCTAGGCAA;TTTAGTGCCTTACATCCATG;TTCATCTCCTCAGCGAAGAG	-0.53;-0.23;0.83;1.23	21933;37691;77074;79134	9.34E-01;4.28E-01;3.78E-01;1.09E-02	500;2560;41944;57700	2.24E+00;1.61E+00;5.60E-01;5.58E-01
	Lmln	0.325297	1.28534	4	ATGGCTGAGAAACTCGACTG;AGGACGTGATGGCGACACGG;GTAATACTCACAACAACACG;AAATACCTATAGTTGAAGGG	-0.67;0.12;0.89;0.96	16003;57003;77587;78123	1.02E+00;6.05E-01;3.87E-01;3.33E-02	1511;2047;22631;63631	2.42E+00;1.18E+00;1.14E+00;3.90E-01
	Yars	0.325005	0.997949	4	TATTAAACTTCTCTCTAATG;AGCCACGTGTGGCTTGCCCG;AGACTCTTACCAGACTTGAG;AGTTCGGCGGTGTTGATCAG	-0.8;-0.46;-0.2;2.75	11487;25253;39425;79609	6.11E-01;5.51E-01;4.42E-01;5.24E-04	25;40209;54383;68146	2.90E+00;4.26E-01;3.94E-01;2.71E-01
	Nuf2	0.324687	1.19404	4	AAGAAGCCCTCCATTAAATG;GAAGAAAATCGCTCTTCGAG;AGCGACTGACCCTGGCACTG;TCACTTCAGAGAAACGTGCC	-0.07;0.12;0.42;0.83	46931;56921;69293;77092	7.87E-01;6.03E-01;4.66E-01;5.63E-02	2542;10341;22713;32703	1.55E+00;1.18E+00;1.12E+00;9.36E-01
	Armcx5	0.324113	1.34727	4	TAAAGGTGCGGGATTTACAG;GTCAAAGGTCGAATACCCAG;GCAGAACCAAAAGAAGAATG;ACAGTAATGACCACAGATGT	-0.68;0.53;0.54;0.9	15429;72344;72610;77721	1.38E+00;5.73E-01;3.91E-01;4.22E-02	1913;7024;7290;64205	2.55E+00;1.41E+00;1.05E+00;3.74E-01
	Ldha	0.324049	1.14257	4	GGAGAACATGGCGACTCCAG;GTCATGGAAGACAAACTCAA;GTTGCAATCTGGATTCAGCG;CAAGCTGGTCATTATCACCG	-0.15;-0.01;0.21;1.25	42220;49999;61427;79171	6.58E-01;4.85E-01;3.77E-01;1.01E-02	463;18207;29635;37414	1.64E+00;1.31E+00;8.88E-01;7.29E-01
	Sv2b	0.323869	1.42261	4	ATAGGGCTGATAGTCTACCT;TTCTTATCACGAGAGAAACG;TTGCAGTTACTACGGCCTGA;ATACAAACATGAGAGCTAAG	-0.75;0.6;0.61;0.83	13149;73910;73920;77126	1.57E+00;6.39E-01;4.15E-01;5.56E-02	2508;5714;5724;66485	2.86E+00;1.57E+00;9.41E-01;3.13E-01
	Deup1	0.323767	0.768737	1	GACCTCCTAAAGAAGCAGAA	0.32	66070	0.0811	13563	0.769
	Mapk7	0.323763	1.28604	4	AGGCTGCAGAGTCAGATCAA;TTGAGGACTTCCATGCACGA;TTCCCTGCACGAGTATACGC;GGTGTAGGTCGCTCTCCATG	-0.0;0.27;0.44;0.59	50620;63990;69850;73583	9.10E-01;8.25E-01;4.79E-01;1.37E-01	6051;9784;15645;29014	1.75E+00;1.61E+00;1.16E+00;6.20E-01
	Prl8a2	0.323571	1.25871	4	GTGGGTTTGTGACATTAGAG;CACTCCTGTATACTATCTAG;ACGCATGTATAGACGTGATG;TTCTTAAATGTGATCACAAG	-0.28;-0.24;0.87;0.94	35055;36827;77471;77978	1.00E+00;5.10E-01;4.31E-01;3.65E-02	1656;2163;42807;44579	2.38E+00;1.11E+00;1.01E+00;5.42E-01
	Actr3b	0.323462	1.23533	4	AGGTAGTTGATCAAGCCCAA;TAAACCTACCTACGCTACCA;TTGGTGAACGCACACTAACG;TACTGTTTGATCCACTTCCG	-0.01;0.19;0.39;0.72	49949;60654;68422;75865	8.86E-01;7.04E-01;4.47E-01;8.42E-02	3769;11212;18980;29685	1.71E+00;1.38E+00;1.06E+00;7.86E-01
	Lig1	0.322558	1.10335	4	GACAATTCAAGACACTCTTG;AGAGTGATTCTCCAGTGAAG;GACCTCACTGACACCCCGAG;TCTTCTCATAGAATTTCCCA	-0.4;-0.1;0.15;1.64	28341;45169;58673;79526	4.42E-01;4.20E-01;3.76E-01;2.34E-03	108;20961;34465;51293	2.27E+00;7.64E-01;7.35E-01;6.47E-01
	Pxdc1	0.322424	1.25277	4	TCTTCGAAATCCGCACCGAG;CTCGTGAACATGTTCGTGCG;GGTGAGAACAACCTCAGACC;GTGCACATGACATAGAGACC	0.02;0.14;0.47;0.66	52023;58151;70764;74833	9.63E-01;6.33E-01;5.05E-01;1.08E-01	4801;8870;21483;27611	1.84E+00;1.24E+00;1.23E+00;6.99E-01
	Gmpr	0.322101	1.31778	4	AATGATGGGAATCCCTGAGT;GCGGGCAGAATGATCTTGAG;CAGCCTCAAGAGCCGATCCG;AAAATGCTCTGAATACCCAT	0.12;0.21;0.39;0.57	57147;61207;68399;73198	1.19E+00;7.22E-01;4.47E-01;1.46E-01	6436;11235;18427;22487	2.20E+00;1.42E+00;1.06E+00;6.00E-01
	Il1f6	0.321776	1.23352	4	AGAGTGTCCAGATATTGGCA;AGGATCTTAGTAGTCGTGTG;CTTTGCACTCCCATGTACGT;TCCTGAACATGTCTAAGCGA	-0.31;0.27;0.63;0.7	33213;63757;74454;75444	8.16E-01;6.72E-01;4.81E-01;9.39E-02	4190;5180;15877;46423	1.65E+00;1.60E+00;9.37E-01;7.47E-01
	Tmem259	0.32154	1.14162	4	CGGTCAGCAAGGGCGCTGCG;GGAACTCATCCAGCAATAGG;GTGCGAGTATCGCAACAGCA;GCAGAACGAAGAATTCAAAG	-0.22;0.09;0.16;1.26	38255;55666;58926;79189	5.76E-01;5.69E-01;3.75E-01;9.71E-03	445;20707;23968;41379	1.66E+00;1.14E+00;1.12E+00;6.53E-01
	Tmem29	0.3213	1.23305	4	TCCCAGCAATATTCTGCACG;CTCACAGTGGCTATACATGA;CTGCTTGAAAGGGATCTCAG;TCTTCAGAAAAGCTAAGCAT	-0.53;-0.28;0.8;1.29	21906;34787;76823;79240	8.97E-01;4.40E-01;3.78E-01;8.59E-03	394;2811;44847;57728	2.16E+00;1.71E+00;5.59E-01;5.06E-01
	Tead3	0.321196	1.30938	4	AGCTGAGGACTGGAAAAACC;GAACTTGTTCTGTAGAACGC;GGTGCAACGGGACCCTGACA;GGGTCCGAAGGCCTGGACAA	-0.56;0.5;0.54;0.8	20546;71590;72422;76827	1.31E+00;5.65E-01;3.75E-01;6.23E-02	2807;7212;8044;59088	2.43E+00;1.39E+00;8.98E-01;5.18E-01
	Syt15	0.321099	1.14543	4	GGTACCACAAATGGTACACT;GGTCTCTCCAGATGATACGG;ATGAAGTTCTCATCAAACTG;AGAGCTGTACAAGTCCCCGG	-0.28;0.17;0.38;1.02	34675;59440;68096;78436	6.68E-01;5.04E-01;4.41E-01;2.63E-02	1198;11538;20195;44959	1.31E+00;1.24E+00;1.04E+00;9.93E-01
	Hax1	0.32109	1.23573	4	AATTCACACACCAGGAGAGT;CAGAACTATTCTCACCTCCG;CTGAAACCGAATTCCTCTGG;GCTCCAGATTGGGGGTCGCA	-0.31;0.29;0.61;0.69	33224;64777;74006;75392	8.60E-01;6.44E-01;4.81E-01;9.51E-02	4242;5628;14857;46410	1.68E+00;1.59E+00;9.38E-01;7.43E-01
	Srcin1	0.320909	1.21324	4	GTCAGGCAGTAAGAGTAGCG;ACTCTCAGCAAAGACCGACG;TTTGCGTTACCTCAACGACG;GGGCGACTTAAGCATGCCCA	-0.21;0.26;0.51;0.72	38836;63622;71828;75771	8.10E-01;5.81E-01;5.41E-01;8.64E-02	3863;7806;16012;40798	1.59E+00;1.33E+00;1.16E+00;7.77E-01
	Stard10	0.320341	1.26696	4	CACACTCTGACCGGAAACTG;TGATGTAATCAGCGCCCATG;TTGACTGTCAACGCTGACGT;GCTCGGACCAAGTCTTTCCG	-0.06;0.31;0.41;0.62	47245;65668;69071;74186	9.01E-01;7.97E-01;4.61E-01;1.23E-01	5448;10563;13966;32389	1.75E+00;1.56E+00;1.10E+00;6.55E-01
	Rnft2	0.319828	1.20674	4	CGGACAACATTCCACCTGAA;GAAGGTATAAAGGACGTACA;TTGACCTGCTGTGGATCGTG;CATTGCTGTGTGCATCGGGA	-0.24;0.16;0.64;0.72	37197;58981;74537;75803	6.78E-01;6.55E-01;5.49E-01;8.56E-02	3831;5097;20653;42437	1.67E+00;1.29E+00;1.09E+00;7.80E-01
	Irf2bpl	0.319592	1.24244	4	GGACAGCTAGCATCTAGGTA;TCCAAGACGGTCGCTCCCCG;TCGCGTCTTTGCCTTCGACG;ACGCTCCAGACCGGACGGGG	-0.03;0.21;0.47;0.64	48795;61139;70747;74533	8.47E-01;7.20E-01;5.04E-01;1.15E-01	5101;8887;18496;30839	1.65E+00;1.41E+00;1.23E+00;6.78E-01
	Gng12	0.319579	1.2004	4	CATACTGTGAGGAGCATGCC;CCAACAGCATAGCCCAAGCC;TGCCTTTATTCTTTCGATGG;GCTCCTCACAGTATGACATC	-0.52;0.15;0.71;0.94	22327;58725;75596;77950	7.61E-01;6.48E-01;3.79E-01;3.71E-02	1684;4038;20909;57307	1.86E+00;1.27E+00;1.10E+00;5.72E-01
	Rbx1	0.319494	1.4959	4	ATGGATGTGGATACCCCCAG;CAGCGGCACCAACAGCGGCG;GGCCTGACATTCGATACCTG;CCACAATGTCCCAGGCCCAG	-0.99;-0.3;1.17;1.4	6476;33714;79006;79388	1.51E+00;5.98E-01;4.47E-01;5.35E-03	246;628;45920;73158	3.44E+00;1.91E+00;4.89E-01;1.47E-01
	Ipo11	0.319231	1.30942	4	ATGGGATTGATCGTTACTGG;GTATAAGCCATTACGACGCA;TCGACATATCTCTGTCAACG;CCAAACACCCCACATATGGT	0.1;0.22;0.39;0.56	56161;62011;68344;73038	1.14E+00;7.49E-01;4.46E-01;1.50E-01	6596;11290;17623;23473	2.12E+00;1.47E+00;1.05E+00;5.92E-01
	Ybx1	0.318773	1.14049	4	GAGAGTGGGGAAAAGAACGA;GCCGGCCCTATCGCAGGCGA;TTGTTGAAGGAGAAAAGGTG;GTCTTACAGGAATGACACCA	-0.34;0.19;0.35;1.08	31296;60470;66965;78718	6.98E-01;4.54E-01;4.22E-01;2.01E-02	916;12667;19164;48338	1.37E+00;1.35E+00;9.69E-01;8.67E-01
	Cxcr4	0.318562	1.13011	4	TGGAGACTATGACTCCAACA;ACAGGCTATCGGGGTAAAGG;TGGTGGCGTGGACAATAGCG;TCTTCTGGTAACCCATGACC	-0.55;0.15;0.31;1.36	21099;58369;65549;79341	6.39E-01;4.04E-01;3.76E-01;6.38E-03	293;14085;21265;58535	1.84E+00;1.25E+00;8.96E-01;5.35E-01
	Olfr855	0.318444	1.13836	4	GAGCACGATGTTGTCAATTC;TTATACACAGAATTATGAGC;AACCAGCATCTTGATGACTG;TTCACACACTTATGGTGCAG	-0.27;0.16;0.21;1.17	35388;58867;61452;79022	6.52E-01;5.16E-01;3.77E-01;1.34E-02	612;18182;20767;44246	1.52E+00;1.28E+00;1.02E+00;7.30E-01
	Poglut1	0.318409	1.12808	4	ATGATATCATGTATCCTGCG;GAGGACCTGACTCCTTTCCG;GGACCCCAGAGGATACCTGG;ATTTCTTGACCAAATTAACA	-0.21;-0.02;0.42;1.08	38779;49645;69492;78707	5.80E-01;4.81E-01;4.70E-01;2.03E-02	927;10142;29989;40855	1.35E+00;1.16E+00;1.13E+00;8.76E-01
	Mcpt4	0.318217	1.2181	4	AGCTGTGAACCCTCTCTCAG;CAGAGGAATTACATTCACAG;CTTCTGACTTTATCAAGCCG;TCCCTCAGTATATCTGAGGT	-0.47;0.38;0.46;0.9	24530;67988;70562;77714	1.03E+00;4.99E-01;3.89E-01;4.24E-02	1920;9071;11646;55104	1.97E+00;1.21E+00;1.05E+00;6.40E-01
	Runx1t1	0.317612	1.27734	4	TCATCCAATCGGTAATGCTG;AACTGAATTACTGGATACGG;GGGATGACAAAAGGTCTCAG;GTGCCCTTGACAGTAACGAA	-0.46;0.48;0.49;0.76	25279;70899;71331;76343	1.24E+00;5.23E-01;3.94E-01;7.33E-02	3291;8303;8735;54355	2.33E+00;1.28E+00;8.37E-01;6.63E-01
	Maged2	0.316763	1.17205	4	GAACCAGGATACTCGGCCCA;CGATCCAAAGGTCAATACAA;GAATGGAAATCGGTCCAGTG;GGAGAGCTTTGCTCTCCCTG	-0.21;0.14;0.54;0.79	38786;58090;72587;76710	6.31E-01;5.80E-01;5.72E-01;6.50E-02	2924;7048;21544;40848	1.41E+00;1.24E+00;1.16E+00;8.82E-01
	Hc	0.316726	1.38063	4	GAACCTCCCATCAAATGTGA;ACCCTAAGGGAATTCGTGGT;AGACAAACCTGTTTACACGC;GCAGATGACTCCCATTATCG	-0.73;0.54;0.65;0.8	13933;72615;74683;76811	1.41E+00;6.88E-01;4.06E-01;6.27E-02	2823;4951;7019;65701	2.60E+00;1.69E+00;8.95E-01;3.34E-01
	Enkur	0.316164	1.18759	4	AATGCAGCTGACGTCATCAT;GTACATATGCAAGCGAAATG;CTTCTTTAGAAAATCCTTGG;ACTGGATGATCGGTTCTCAA	-0.34;0.33;0.37;0.9	31594;66337;67879;77681	9.35E-01;4.58E-01;4.37E-01;4.31E-02	1953;11755;13297;48040	1.81E+00;1.04E+00;1.02E+00;8.78E-01
	Stfa3	0.31605	1.30112	4	TATAAATCTCAAGTCGTTGC;AATCCAGATGATTGCTGACA;TTTCAGATAGATGTAGGGAA;GAAAACTTAAAAATAAAGGG	-0.92;0.06;0.84;1.28	8148;54196;77161;79231	9.47E-01;5.47E-01;5.29E-01;8.79E-03	403;2474;25439;71486	2.26E+00;1.70E+00;1.05E+00;1.87E-01
	Snap91	0.315937	1.1932	4	TGCAAATATGTCAACTGGCG;ATTTCTAACTAGAATGACGA;CATCCAAATGAACTAACCAA;ATTGAATAGCGTATTCCTAG	-0.05;0.11;0.45;0.76	48062;56426;70093;76335	8.23E-01;5.92E-01;4.86E-01;7.35E-02	3299;9541;23205;31572	1.61E+00;1.18E+00;1.15E+00;8.36E-01
	Prom1	0.315758	1.31284	4	CAGCAACAGATACTTAAACC;AAGGACTCCGATCTCATAGA;CAAAGCCATATATAATGCCA;GAGTGAAGACTCACGCCATG	-0.21;0.46;0.48;0.53	38654;70586;71039;72272	1.22E+00;5.77E-01;5.14E-01;1.68E-01	7362;8595;9048;40980	2.28E+00;1.25E+00;1.15E+00;5.58E-01
	Armc8	0.315594	1.21479	4	CTGGCTCAATCAGATAGGCG;GAACCGCTCCTAGAACGATG;GTTTCCAGGATCATGCGGTG;CGATGACCCTGGTAAACGGT	-0.42;0.37;0.47;0.84	27428;67839;70649;77173	1.02E+00;5.02E-01;4.11E-01;5.45E-02	2461;8985;11795;52206	1.96E+00;1.22E+00;9.49E-01;7.34E-01
	Ppp1r9b	0.315372	1.24688	4	GTGGATGTGAGCGCCTACAG;ATTCAGCACCTACTCCAACG;GGTCGCGCCATCCCCCGACG;GCGCGGGCTTGGAGTCGAAG	0.0;0.08;0.57;0.62	51127;54939;73094;74117	9.29E-01;5.95E-01;5.61E-01;1.25E-01	5516;6540;24695;28507	1.78E+00;1.47E+00;1.08E+00;6.51E-01
	Ascc3	0.315041	1.20399	4	GCAAAAATGTAGCAACATCG;CTTCAAACCTACATCAGCCG;TAGAGTTATTGAACTAACTG;GCTGGGGACAGTCACCAACG	-0.97;-0.06;0.57;1.71	7080;47630;73234;79547	6.02E-01;5.70E-01;4.60E-01;1.88E-03	87;6400;32004;72554	2.36E+00;1.48E+00;8.09E-01;1.62E-01
	Cd164l2	0.314682	1.20623	4	TCTCCCACCAGGACACTGTG;GGGACACTGTGAACACTGTG;ATTACCAGCTAGAACCAGCT;CGTTTGGCCTACTACCCAAG	-0.33;-0.07;0.81;0.85	31893;46899;76931;77238	9.12E-01;4.62E-01;4.54E-01;5.30E-02	2396;2703;32735;47737	2.19E+00;9.59E-01;8.89E-01;7.86E-01
	Bod1l	0.31455	1.3296	4	TGGTAAGCTGACTATCACTG;TTCTGATGACGAACTCACAG;TCGTCAAAACACAAACACAA;CAAGTCAATGAGTGTGACTG	-0.82;0.31;0.83;0.94	10796;65393;77048;77995	9.30E-01;8.88E-01;4.56E-01;3.61E-02	1639;2586;14241;68838	2.23E+00;1.73E+00;1.11E+00;2.53E-01
	Glod5	0.314371	1.33762	4	AAGTCTACAGATAAGACACG;TCTTTACAGTCATCACAATG;TGTGATCAAACAAACATCCA;CCAAAAATTTAACTTACACG	0.15;0.28;0.28;0.55	58506;64153;64251;72845	1.26E+00;8.32E-01;3.92E-01;1.55E-01	6789;15383;15481;21128	2.31E+00;1.63E+00;8.36E-01;5.83E-01
	N4bp3	0.314285	1.24058	4	GTATGTGGAACGACTTCATG;CGGCGACCTCTTCAGTAGTG;ATAGTCTGGCTCGTTCCGAG;GTGATTAATGTGGCCCAAGG	0.02;0.24;0.27;0.73	51801;62786;63820;75937	9.54E-01;7.77E-01;3.88E-01;8.26E-02	3697;15814;16848;27834	1.83E+00;1.52E+00;8.18E-01;7.93E-01
	Etv2	0.314232	1.2231	4	TGGAAAGGTACGTCTTCGTG;GCTGGAGGGTGCGACCACGA;CCCTTCAAAGCCGACGAAGG;GTTCGGACTACACCACCACG	-0.39;0.29;0.63;0.72	28570;64865;74457;75844	8.64E-01;6.73E-01;4.22E-01;8.47E-02	3790;5177;14770;51064	1.68E+00;1.65E+00;7.84E-01;7.72E-01
	Olfr954	0.314197	1.55286	7	CATGGCTATATTGTAAACCA;CTGAGCCAAGCATTCAGGGT;TTCTGTGCATCAGTAAACAT;TGGCTATATTGTAAACCAAG;GTTCTGTGCATCAGTAAACA;GATAGATTCCTGTGAAGAAG;CCTGTGAAGAAGAGGAACAG	-0.35;-0.12;0.12;0.44;0.53;0.67;0.9	31086;43847;57262;69971;72317;75076;77698	1.43E+00;1.09E+00;9.61E-01;9.33E-01;8.53E-01;5.51E-01;7.48E-02	1936;4558;7317;9663;22372;35788;48548	2.29E+00;1.73E+00;1.72E+00;1.50E+00;1.50E+00;1.29E+00;8.33E-01
	Ccdc15	0.313772	1.18919	4	AATTCCCGACCAATTTGGTG;TCAATCAGCGGGTTAAGCTG;AGGTGTTGAGCCAGACACCC;ATTTGAATGCTGCTGTTGGA	-0.49;0.24;0.61;0.89	23692;62773;74086;77582	7.77E-01;6.49E-01;3.85E-01;4.53E-02	2052;5548;16861;55942	1.60E+00;1.52E+00;1.02E+00;6.13E-01
	Susd2	0.313601	1.27034	4	AAGTGAAGAAGCCGGTATTG;AGTGCCGTAGTATTGCCAAT;GGCCGGCGCTTCATATAACG;CTGCCCGGAAGTCGTCACCC	0.08;0.16;0.42;0.59	55062;59179;69284;73686	1.09E+00;6.60E-01;4.66E-01;1.35E-01	5948;10350;20455;24572	2.04E+00;1.30E+00;1.12E+00;6.26E-01
	Hcn1	0.312999	1.23251	4	TAATCAGATACATACACCAG;GTGTGCTTCAAGGTGGACGG;CAGAGCAGACGACAACACCG;GAGTACCTATCCGATCGAGT	-0.73;0.34;0.51;1.14	13851;66527;71751;78908	9.45E-01;5.38E-01;4.06E-01;1.59E-02	726;7883;13107;65783	1.83E+00;1.45E+00;1.32E+00;3.32E-01
	Pdhb	0.312743	1.25623	4	TGAAGCTATTAATCAAGGTA;GGGCACAGGCTGAAGGCCAG;GCCATTCGTGATAATAACCC;TCTTAATTGTAGGTTAGCAG	0.06;0.08;0.5;0.6	54131;55211;71660;73895	1.05E+00;5.67E-01;5.35E-01;1.30E-01	5739;7974;24423;25504	1.98E+00;1.31E+00;1.10E+00;6.38E-01
	Olfr1183	0.312712	1.1438	4	AACTAGCAAGTTTATCACAT;GTGAATACAAGACCCTACCC;TCTTAATGGTCATCACGATG;GCTTACAAATTGCTACATAG	-0.43;0.24;0.38;1.05	26933;62683;68089;78609	7.74E-01;4.41E-01;4.07E-01;2.25E-02	1025;11545;16951;52701	1.52E+00;1.31E+00;1.04E+00;7.17E-01
	Arap1	0.312666	1.31575	4	TTGCAGTGGAGCGGAACGAG;AGATGCGGTAGGGGGTAGTG;ACGGGCAGTGACACCCAATG;GGTGGATTCAGGCCACTCGT	0.09;0.25;0.4;0.5	55763;63275;68730;71621	1.12E+00;7.96E-01;4.53E-01;1.84E-01	8013;10904;16359;23871	2.09E+00;1.56E+00;1.08E+00;5.33E-01
	D630003M21Rik	0.312512	1.26892	4	GCAGGTAGCACAGATAGCTG;ACCATGGTGTACTACCTCAG;CTTTCCCCAAGAGTATAGAG;AGAGACACTTGAGTGTCATG	-0.65;0.38;0.64;0.88	16655;68211;74530;77510	1.04E+00;6.77E-01;3.83E-01;4.69E-02	2124;5104;11423;62979	2.00E+00;1.67E+00;1.01E+00;4.08E-01
	Irx1	0.31208	1.39988	4	GGCATACATGCCTAGCACCG;CTATGGTCAGTTTCAATACG;GATCAGATCGACGAGCGTGA;TGTCTCAGCAGCCGACAATG	0.21;0.25;0.38;0.41	61413;63051;68110;68908	1.43E+00;7.88E-01;4.41E-01;2.51E-01	10726;11525;16583;18221	2.56E+00;1.54E+00;1.04E+00;4.57E-01
	Olfr389	0.311931	1.24907	4	AGACAATCTAGCCATGAGCA;ATGGGAATCCAGTCGAACAA;AAATGATACTCTGACAAGAT;GTACCATCTATATCTTATGT	-0.27;0.37;0.54;0.62	35195;67638;72474;74132	1.01E+00;5.67E-01;5.13E-01;1.24E-01	5502;7160;11996;44439	1.94E+00;1.40E+00;1.01E+00;6.52E-01
	Atp8a2	0.311764	1.11136	4	ACAACTTCGACTCTACTGCA;GGCCCTTATCCTATTGAAGG;GCAAGCCCTCTTCATAAACT;CAGTGTTAAGAAATGGCATG	-0.21;0.03;0.27;1.15	38825;52480;64069;78949	5.81E-01;5.19E-01;3.90E-01;1.50E-02	685;15565;27154;40809	1.47E+00;1.16E+00;9.81E-01;8.29E-01
	Mak16	0.311675	1.20281	4	TGAGTAAGAAGGTTGAACGA;CATTTGTGTCTGATAAAGCG;GCAGTGCTACCTGTACATGA;CATCCTAGAACCAAGACTCA	-0.05;-0.03;0.6;0.73	48065;48823;73848;75920	8.23E-01;6.35E-01;4.72E-01;8.29E-02	3714;5786;30810;31569	1.61E+00;1.56E+00;8.48E-01;7.91E-01
	Zfp647	0.311441	1.12754	4	TCCGCATACATGGCATACGT;CCCACACAAGGGACACACGT;CAGTGAGACTACATTCCCGT;GCTTCGTCTGAGATTAATGG	-0.12;-0.04;0.27;1.14	44129;48728;63737;78904	7.07E-01;4.71E-01;3.88E-01;1.60E-02	730;15897;30907;35505	1.45E+00;1.40E+00;8.44E-01;8.15E-01
	Hoxa9	0.311406	1.17218	4	ACCGGGCCATTAATAGCGTG;GCAGATTTCATGTAACAACT;CGCGTGCACTGGGTTCCACG;GTGCGGGACGCTACGCTCCA	-0.16;0.09;0.56;0.75	41655;55684;73048;76212	6.44E-01;5.93E-01;5.76E-01;7.63E-02	3422;6586;23950;37979	1.46E+00;1.29E+00;1.12E+00;8.22E-01
	Vps39	0.311346	1.09795	4	GAACAACCACTGTCATATCG;TCTCATTGACTACCTGACAC;TCTGACTGTGGTGCTTAACG;GCAGAGACTCTACCTCCGGG	-0.33;-0.02;0.16;1.44	32111;49508;59089;79417	4.79E-01;4.65E-01;3.75E-01;4.72E-03	217;20545;30118;47523	1.97E+00;8.97E-01;8.71E-01;6.58E-01
	Glb1	0.311302	1.17871	4	GCGTAGGTAGTCGTAATCGC;GCAGGACCTGTACGCCACAG;CTTCCCGAGATGTATCGGAA;GGGTACTCACAAGTTCACGT	-0.04;0.1;0.41;0.78	48263;55918;69032;76615	8.29E-01;5.81E-01;4.60E-01;6.71E-02	3019;10602;23716;31371	1.62E+00;1.13E+00;1.10E+00;8.70E-01
	2310022B05Rik	0.311265	1.18451	4	TTCCGCTCCCGGTCGTCCAG;CCGCACGTCCCCCGCATCGG;TCGGCATTGATCTTCCAGAA;GGGAGAAGTACGGGCCCGAG	-0.1;0.17;0.44;0.74	45142;59696;69837;76017	7.35E-01;6.75E-01;4.79E-01;8.07E-02	3617;9797;19938;34492	1.45E+00;1.33E+00;1.16E+00;8.01E-01
	Trim5	0.311226	1.10765	3	CAGGTTCAGACAGACAGGAC;GTTACCAGTCTAGCAATCTG;ACAGAGGCTCAACGCTACTG	0.01;0.42;0.5	51182;69457;71632	6.09E-01;5.35E-01;1.38E-01	8002;10177;28452	1.37E+00;1.34E+00;6.13E-01
	Il20rb	0.311105	1.24908	4	TCTATTGTGTGGAGTATCAG;TGTTGGTTGACTGTACAGAG;TTCACACAGTACATGGCCCC;CCTGAAGTTATATGGCACTG	-0.07;0.22;0.55;0.55	47080;61718;72646;72663	7.92E-01;7.39E-01;5.74E-01;1.59E-01	6971;6988;17918;32554	1.55E+00;1.45E+00;1.42E+00;5.75E-01
	C1qc	0.311079	1.24804	4	ATCATGCCCGTCCTTCCCAG;CTGTGGTCACCAACCCTCAG;GCTCCCCCGGAGGCCCCCTG;GGGTGACTGTGAATACCGAC	-0.4;0.42;0.52;0.7	28331;69253;72123;75548	1.11E+00;5.52E-01;4.20E-01;9.15E-02	4086;7511;10381;51303	2.11E+00;1.36E+00;7.64E-01;7.56E-01
	Dbh	0.310709	1.16813	4	CGTGCCGGCAGTAGTTGAGT;AGTGATATAGCACCAGTACG;AACTTCCAGTCGGAGAAACG;AGAGCTCTAAAATCCCTTCG	-0.36;0.28;0.47;0.85	30275;64285;70843;77290	8.38E-01;5.07E-01;4.41E-01;5.19E-02	2344;8791;15349;49359	1.64E+00;1.24E+00;9.68E-01;8.31E-01
	Fam167b	0.310652	1.25171	4	TCAAAGCCACAGATGGCCCC;GGACTCTGGCAGTCCACTCG;CTTGGGCTCTGTACCAAGCC;CCATGGATTCTGCGCTTGAG	0.06;0.15;0.41;0.62	54358;58622;68941;74188	1.06E+00;6.45E-01;4.58E-01;1.23E-01	5446;10693;21012;25276	1.99E+00;1.27E+00;1.09E+00;6.55E-01
	Slamf8	0.310585	1.17088	4	AAGACCTGACAGGTATTGAG;GTGCTGATGGTGGATACAAG;CAGTGTCCAAGTGCTAAGCA;AGATGCAGTACCCAAGCCCG	-0.25;0.28;0.38;0.82	36545;64428;68167;77046	8.44E-01;5.36E-01;4.42E-01;5.74E-02	2588;11467;15206;43088	1.65E+00;1.07E+00;1.04E+00;9.29E-01
	Xlr5a	0.310563	1.32706	7	AACTCAGATGAAGTTAACCC;GCAGCTGACAAACCAGCAGT;TTCAGGATCAGACATGCAAG;AAAGAAGAAGCAGTTTGAAG;GTCGGTGTACCACAATTGGC;GTACTGTGAAAGATTTGGGT;TCTTGAAGTCATCTGATGGG	-0.45;-0.16;0.07;0.13;0.15;0.59;1.84	25870;41754;54798;57333;58719;73592;79574	9.67E-01;8.52E-01;6.85E-01;6.67E-01;5.01E-01;4.80E-01;2.25E-03	60;6042;20915;22301;24835;37879;53764	2.28E+00;1.53E+00;1.37E+00;1.19E+00;1.10E+00;1.09E+00;7.27E-01
	Scoc	0.310445	1.26782	4	TCTAACCTTCAAGTGTGTGT;GATGGACGGATTGAGCACAG;GAATGCTGACATGGACGGTG;TTTAAAGAGTTGGCGTTCGA	0.14;0.15;0.26;0.7	57904;58570;63355;75494	1.23E+00;6.44E-01;3.85E-01;9.27E-02	4140;16279;21064;21730	2.26E+00;1.26E+00;7.99E-01;7.52E-01
	Slbp	0.310435	1.19176	4	TCTCGGACGGAAGCGCAGAG;TCGGGACCCACCTTTCAGGT;AGAGGAAGTCATCATCGGGA;CTTACCTCGCACCACCGTCG	-0.02;0.14;0.36;0.76	49503;58175;67548;76306	8.71E-01;6.34E-01;4.31E-01;7.41E-02	3328;12086;21459;30114	1.69E+00;1.24E+00;1.00E+00;8.32E-01
	Bok	0.310407	1.16354	4	GCCGGGAGTACGTGCACGCG;CCCTGTATTCCGTGGCCGCG;TCCCAGCGTATACCGGAACG;CTCTCTCTAGGTATCACATG	-0.49;0.05;0.7;0.98	23565;53473;75528;78248	7.55E-01;5.35E-01;3.84E-01;3.05E-02	1386;4106;26161;56068	1.84E+00;1.18E+00;1.02E+00;6.10E-01
	Tmem144	0.309606	1.16682	4	AAGCCAATGCTGAATTACGT;AGTGAAATTCCGAATAACCC;GGTAGAAAGTCTATCCACCC;GGACTTGGAATCCTAATCTG	-0.61;-0.19;0.68;1.36	18282;39960;75226;79332	7.29E-01;4.26E-01;3.77E-01;6.58E-03	302;4408;39674;61353	1.82E+00;1.79E+00;6.05E-01;4.53E-01
	Sfn	0.309151	1.23996	4	CATCGAGCAGAAGAGCAACG;AGCTTTCATGAAGAGCGCCG;TTCCGTAGCTTACAAGAACG;GGACTCGCACCTCATCAAAG	-0.32;0.35;0.58;0.63	32519;67062;73390;74364	9.75E-01;6.10E-01;4.71E-01;1.19E-01	5270;6244;12573;47115	1.88E+00;1.50E+00;9.12E-01;6.66E-01
	Dnah8	0.309133	1.25451	4	AATTCAACGAGATCATCCGA;AGACATGCTGACCCTCAACG;GAAGTTAGCCTTATCGATCG;TTACGCGGAACTGCAATCCG	-0.1;0.36;0.38;0.6	45309;67223;67963;73852	9.84E-01;7.39E-01;4.38E-01;1.31E-01	5782;11671;12411;34325	1.89E+00;1.46E+00;1.03E+00;6.35E-01
	Fry	0.309078	1.18136	4	AGCTTTCAGTCTCAACCCAG;CCAGAGACCATCACTCCGAG;GCACGACAGCTCATTCCCAA;CCGAATTAAGATGTACCCCG	-0.09;-0.08;0.61;0.79	45696;46264;74053;76719	7.50E-01;6.47E-01;4.49E-01;6.48E-02	2915;5581;33370;33938	1.59E+00;1.48E+00;8.83E-01;7.67E-01
	Pebp4	0.309056	1.12247	4	GCCGATAGTCAAGTTCCACA;GTCTCCAGTATTTCATCACG;TGTCTGTATAGATTGCACTT;AGAAAACTTCTAGGTTCCTA	-0.15;0.01;0.39;0.99	42088;51426;68310;78295	6.54E-01;5.03E-01;4.45E-01;2.94E-02	1339;11323;28208;37546	1.31E+00;1.19E+00;1.05E+00;9.40E-01
	Shb	0.308649	1.36422	4	GCTCAACAAGTGCTCCGCCG;TTTGATGAGTCGGTGCTTAG;GTCGGGCAGAGAGCCCGACG;GACACCCCGTACGAGCCGGA	-0.77;0.49;0.72;0.8	12277;71239;75767;76814	1.27E+00;7.77E-01;4.28E-01;6.26E-02	2820;3867;8395;67357	2.38E+00;1.89E+00;8.96E-01;2.91E-01
	Rnf144a	0.308277	1.13618	4	GATGCTGCCTGTCCCAAACA;AGAGCAGAATTCCATGTCAC;CTGGGCACCACGTCCGACAA;GCTCCGCTGGGTATTCCCCG	-0.1;0.08;0.3;0.96	45090;54983;64919;78110	7.33E-01;5.62E-01;3.97E-01;3.35E-02	1524;14715;24651;34544	1.45E+00;1.14E+00;1.09E+00;8.66E-01
	Cyp26a1	0.308253	1.1672	4	CCTTATACACGCGCGCATCG;TGATGGGCGCGGATAATGTG;CTACGTGCCCGTGATCGCTG;GGGAAGCCCATGGTACCGGG	-0.08;-0.06;0.55;0.83	46372;47169;72752;77056	7.70E-01;5.79E-01;4.56E-01;5.71E-02	2578;6882;32465;33262	1.52E+00;1.43E+00;9.31E-01;7.94E-01
	Hmga2	0.307895	0.908636	2	CCTTCTGGGCTGCTTTAGAG;TTGCAGAAAGCAGAGACCAT	0.1;0.51	56189;71883	3.81E-01;8.89E-02	7751;23445	1.06E+00;7.55E-01
	Neurog1	0.307238	1.15349	4	CAGCTTCCTCACCGACGAGG;GAACATTCGATGCCCCGGAG;GGCTGGCACGGACAGCCCCG;GCAGATCAAGGGCTCCCCGG	-0.41;0.1;0.66;0.88	27607;56162;74899;77507	7.04E-01;5.86E-01;4.13E-01;4.70E-02	2127;4735;23472;52027	1.73E+00;1.14E+00;1.01E+00;7.39E-01
	Mroh2b	0.306986	1.21326	4	GAATGATTTCTACATCACAC;TCCTTGAAGAGAATATTCGG;TTTATGGAAAATCAGTGACG;GGATACATCGAAGCTCGGGA	0.06;0.09;0.35;0.73	54027;55486;67068;75982	1.04E+00;5.72E-01;4.24E-01;8.15E-02	3652;12566;24147;25607	1.97E+00;1.11E+00;9.75E-01;7.98E-01
	Zfp35	0.30691	1.13401	4	CAGACCTTATTAAACACAGA;GGATTCTGTAATGTTTAACA;AAAAGCTTTAGCCAGCACTC;TCTTTGCCTCTGGAGTCATG	-0.39;-0.09;0.65;1.05	29035;45661;74710;78606	6.90E-01;4.45E-01;4.27E-01;2.25E-02	1028;4924;33974;50599	1.69E+00;1.30E+00;7.88E-01;7.49E-01
	NO_CURRENT_192	0.306721	1.15103	4	GCTTCGACCACGGGTACTGC;GCTTCGGAGGCTACGTAGTA;GCTTGAGGCAACGCGACTGA;GCTTCTACTCGCAACGTATT	-0.1;0.04;0.47;0.82	45156;53160;70685;76968	7.35E-01;5.29E-01;5.03E-01;5.91E-02	2666;8949;26473;34479	1.45E+00;1.22E+00;1.01E+00;9.18E-01
	Gtsf1l	0.306395	1.16691	4	TGGTACTGGAACCTGCTGAG;GCTTTCTGATGGGAACCACG;CTGTGTCAACAGGAGCTCCG;AGGACACACTACAGGTTCGT	-0.28;0.32;0.33;0.86	34723;65784;66310;77354	9.07E-01;5.05E-01;4.13E-01;5.04E-02	2280;13324;13850;44911	1.76E+00;9.95E-01;9.79E-01;9.34E-01
	Pls3	0.306128	1.25081	4	GACATGTTAATATCTATCCG;TATCGCTAAAACCTTCCGAA;AGAGTTCATCCAGTTGCGGA;GGGTGTCACGTTGTGAACAT	-0.54;0.44;0.53;0.79	21340;70022;72281;76676	1.17E+00;5.59E-01;3.76E-01;6.57E-02	2958;7353;9612;58294	2.21E+00;1.38E+00;8.77E-01;5.42E-01
	N4bp1	0.306092	1.19748	4	GAGTTGCAGCCAGATACGCG;TTACTGAGGCTCGATTGGGA;CCATTGTATAACTGTCTGCG;ACTTCATCTCTAGCACTACT	-0.03;0.22;0.27;0.77	48978;61971;63807;76413	8.53E-01;7.48E-01;3.88E-01;7.17E-02	3221;15827;17663;30655	1.66E+00;1.47E+00;8.45E-01;8.18E-01
	Serpinb3a	0.305925	1.19107	4	TATGATTGTCCTGTTGCCAG;GGAATATTATCAAGCTAACG;CACTGAAAAACAAATTGAGA;CTCCTGTTCAGGCTCCCATT	-0.28;-0.18;0.8;0.89	34583;40569;76727;77610	8.84E-01;5.02E-01;4.26E-01;4.47E-02	2024;2907;39064;45051	2.13E+00;1.03E+00;9.90E-01;6.19E-01
	Ilvbl	0.305704	1.26468	4	GATGCCTGGGGAATATCCAA;AGTGGTAGACACACGCCACG;AGTTGAGCAAGAGATCATCC;GGGACATTGTACCTACCCTG	-0.7;0.45;0.5;0.98	14821;70287;71427;78204	1.19E+00;5.27E-01;3.96E-01;3.15E-02	1430;8207;9347;64813	2.24E+00;1.29E+00;1.17E+00;3.58E-01
	Dennd2c	0.30535	1.29789	4	ACCAGTGGGACGCTTATGAG;GCTGCTCCTGTAGCTCAATG;TCTACACCTCCCAGATACCG;AAATACCTGAATGTCCTACG	-0.82;0.2;0.88;0.96	10726;61019;77526;78081	1.01E+00;7.16E-01;4.57E-01;3.42E-02	1553;2109;18614;68908	2.40E+00;1.41E+00;1.13E+00;2.51E-01
	Camkk1	0.305348	1.22897	4	CACCATCGAGTCCCACCGTG;AGCACTGCCAGGGATCACGG;GGTCTCACTCACAGTACTCG;TCAATTTGACTACATTCACG	-0.51;-0.23;0.9;1.06	22712;37663;77666;78638	1.04E+00;4.29E-01;3.80E-01;2.18E-02	996;1968;41971;56922	2.46E+00;1.32E+00;5.83E-01;5.58E-01
	Dnal1	0.305188	1.11897	4	TCTACTCACCCATCTGGACA;TTACTCGCAGTTACCAAGTG;CATAAAGAACCTAAATGGAC;CTTACTTAGGCCATTCAGGT	-0.29;-0.14;0.57;1.08	34129;43066;73115;78724	5.96E-01;4.95E-01;4.32E-01;1.99E-02	910;6519;36568;45505	1.47E+00;1.35E+00;9.72E-01;6.79E-01
	Mrgpra3	0.305085	1.10233	4	GGCGGCAGTGATACCAGATG;TCACATCATAAATTCCACAG;AGATGATGATCATCAAGTCT;CAACCTGGCCAGTAGAGCCA	-0.66;0.03;0.32;1.53	16479;52445;65791;79482	5.18E-01;4.07E-01;3.84E-01;3.30E-03	152;13843;27189;63155	2.12E+00;9.79E-01;9.07E-01;4.03E-01
	2310033P09Rik	0.30473	1.14768	4	AAGCAGAGGGAGAACTACTT;CTTCTCGGGATAGCGCCACA;GGCCTTCGCTGTCCACACGG;GTGTACCGGCCCGAGCCGTG	-0.66;0.08;0.58;1.22	16407;55122;73445;79107	6.13E-01;5.65E-01;3.85E-01;1.15E-02	527;6188;24512;63228	1.59E+00;1.51E+00;1.09E+00;4.01E-01
	Myct1	0.304705	1.16971	4	CCCAGGTCTTCCTACAACCA;ACTGGGTTCTACCGCCACAG;GATTGCAAGCCCAATCGCCA;CCAGTGCACCCATTTCGCAG	-0.13;0.0;0.6;0.74	43590;51091;73862;76077	6.92E-01;6.36E-01;4.99E-01;7.94E-02	3557;5772;28543;36044	1.57E+00;1.38E+00;9.27E-01;8.07E-01
	Fam162b	0.304444	1.2508	4	CAGGGGTGACACGCGACCCG;AGCCGCAGCGTTCTGCGACT;CCTGGGGGCTCAAATCCGCT;CTTCACACTTACGGTACAAG	-0.26;0.39;0.52;0.57	35671;68535;71911;73262	1.06E+00;5.44E-01;5.21E-01;1.45E-01	6372;7723;11099;43963	2.03E+00;1.34E+00;1.03E+00;6.03E-01
	Ggn	0.304373	1.10401	4	GGGGTGTTATCCGTGAAGAA;GAGCCGTATTCGGTTCTCGA;AACCCAAGACTCGTACACGC;GAATTAAGCACCTCGAAAGG	-0.52;-0.18;0.49;1.43	22061;40687;71175;79416	5.18E-01;4.26E-01;3.78E-01;4.74E-03	218;8459;38947;57573	1.96E+00;1.27E+00;6.21E-01;5.64E-01
	Mmp27	0.304105	0.989539	3	AAGGTAACCACCAAGCCAAG;AGAGGACCATCAAAGTGACG;AGATGAAACATGGATAGCCA	-0.33;0.22;1.02	32226;61920;78426	3.94E-01;3.66E-01;1.99E-02	1208;17714;47408	1.36E+00;9.38E-01;6.76E-01
	Brd8	0.304022	1.22127	4	GGTGGCACAAGCTTAACTGG;GAAGTCTCCATACCAGTCTG;TTGGAGTCAAGTCTCCAAGT;TTCCACCTTAATCTCAACAC	-0.12;0.3;0.44;0.6	43804;65172;69801;73882	8.78E-01;6.98E-01;4.78E-01;1.30E-01	5752;9833;14462;35830	1.71E+00;1.39E+00;1.15E+00;6.37E-01
	Spz1	0.303876	1.35837	4	CTGTCAGAACTTAACGTCAG;CATGGTACCAAAGTTTGCAA;TGCTGAGCGTGAAAAGACCG;GGAGTGATCCGATTTCAAGG	0.21;0.23;0.3;0.47	61458;62218;65073;70874	1.44E+00;7.57E-01;3.99E-01;2.02E-01	8760;14561;17416;18176	2.57E+00;1.49E+00;8.73E-01;5.08E-01
	Wdr60	0.303756	1.2574	4	TACCGAAGATCGACACTCCG;ATGTCATACTCATTTACTGG;CTCTTGAGTCGAGATATGCG;CCTCCACAGAACATCCTCGT	0.03;0.25;0.37;0.56	52787;62896;67759;73052	9.93E-01;7.82E-01;4.35E-01;1.50E-01	6582;11875;16738;26847	1.89E+00;1.53E+00;1.02E+00;5.93E-01
	Clk2	0.303702	1.18797	4	ATCGGCGGCTGTACGATCGG;GTGTCAACTTGTTATCATGG;CTTGTAGCCAGTCCCCGACG;GCAGTGACCGGACAAGGCGG	-0.12;0.25;0.39;0.69	44287;62992;68425;75415	7.85E-01;7.11E-01;4.47E-01;9.45E-02	4219;11209;16642;35347	1.54E+00;1.41E+00;1.06E+00;7.45E-01
	Nr2e1	0.303574	1.19171	4	AGGACCCCGCTCGTGCTGCA;CACTTCGTAGAGATACATTG;TTCTGTGTGTCTTGTCTACG;AGTGTTAGCATCAACCGGAA	-0.7;0.26;0.56;1.1	14707;63589;72903;78786	8.09E-01;5.86E-01;3.98E-01;1.86E-02	848;6731;16045;64927	1.58E+00;1.44E+00;1.38E+00;3.55E-01
	Clcn6	0.303514	1.30304	4	CTACAAATGAGATCACCTAT;GAAAGGGCGAAGATACGAGG;AGAATAAGGCCAGGGTGACG;GCGTGACTTTGTGTCAGCGG	0.1;0.21;0.44;0.46	56126;61416;69901;70572	1.14E+00;7.29E-01;4.81E-01;2.10E-01	9062;9733;18218;23508	2.12E+00;1.43E+00;1.16E+00;4.99E-01
	Olfr52	0.303112	1.37933	4	TTGTGACCATATACAATAGA;GAGTGTGAATCAATGCCATG;TGTGAGAAAGCAGCCTAACT;TTAACTCCTTGCGATCTGTG	0.23;0.24;0.3;0.44	62152;62712;65283;69902	1.48E+00;7.75E-01;4.01E-01;2.26E-01	9732;14351;16922;17482	2.63E+00;1.52E+00;8.83E-01;4.81E-01
	Slc4a4	0.302941	1.23448	4	AGAGAATGTTCAGATGAATG;ACTTTGAAGTCAGAGTTGAT;AGCCTGCTGTAGGCGAACAA;GCCTCCAAAAGTGATGGCGT	-0.02;0.24;0.41;0.57	49751;62797;69164;73253	8.79E-01;7.78E-01;4.63E-01;1.45E-01	6381;10470;16837;29883	1.70E+00;1.53E+00;1.11E+00;6.03E-01
	Nme6	0.302688	1.16116	4	CGTGCTCGAAATACTCTGGT;ACTTCCACGAATTGAATCTG;GTTCCTCATTGTACGAACGA;CATGCTCTCGGTAAAACCTC	-0.05;0.05;0.45;0.77	47830;53512;70187;76407	8.15E-01;5.35E-01;4.88E-01;7.18E-02	3227;9447;26122;31804	1.59E+00;1.18E+00;1.02E+00;8.44E-01
	Rab11b	0.302528	1.29077	4	GTCCACCTGAATGCTGCGAG;TTACTCTGCAGGTACTACCG;GCACTTGACATATGAGAACG;CCCGCAAGTGGTGCTTATTG	0.02;0.32;0.39;0.49	51914;65810;68306;71193	9.59E-01;9.08E-01;4.45E-01;1.95E-01	8441;11328;13824;27720	1.83E+00;1.76E+00;1.05E+00;5.19E-01
	Foxk1	0.302502	1.30722	4	TTCCACATGATCCCGACTTG;GCTACTTCATCAAAGTCCCT;GGCCGTGCTCGGGAACCGGA;GGCCTTCGCAGCAAACTCTG	0.15;0.22;0.33;0.52	58508;61704;66146;71986	1.26E+00;7.38E-01;4.11E-01;1.75E-01	7648;13488;17930;21126	2.31E+00;1.45E+00;9.25E-01;5.47E-01
	Apoh	0.302267	1.24227	4	CAGCTCATCTAAGTGCACGG;AAAGACATCCTACGACCCTG;AGGATTATAGGCCTTCAGCT;TTTCCGATCATGGCAAAGTG	0.12;0.14;0.14;0.81	57285;57856;58183;76859	1.20E+00;6.26E-01;3.76E-01;6.16E-02	2775;21451;21778;22349	2.21E+00;1.23E+00;9.02E-01;6.34E-01
	Nrip3	0.302242	1.18057	4	TCAATCAGGCTAAGTCTGAA;GTGAAAGCTTTGGTTGACAC;AACCCCATAACATTCTGCAG;CAAATCTCACAAGCATGAAG	-0.31;0.19;0.65;0.69	32930;60265;74730;75313	6.92E-01;6.91E-01;4.77E-01;9.69E-02	4321;4904;19369;46704	1.70E+00;1.36E+00;9.27E-01;7.36E-01
	Spink8	0.301791	1.16608	4	TATGAACTTTCACATGACCG;AAGGTCAGTGAGCCTATATG;TCATGTGAAAGTTCATAGGA;TTGTAACTCACCAACTGCAA	-0.1;0.11;0.5;0.7	45117;56435;71571;75520	7.34E-01;5.92E-01;5.32E-01;9.21E-02	4114;8063;23199;34517	1.45E+00;1.30E+00;1.15E+00;7.54E-01
	Tnfaip8l2	0.301766	1.24921	4	GCGTGTATTCTTTGGACACG;GACCGCACTTAGCTTCGGTG;TTTCGTCAGAAGCTACGGCA;GTCGATAAAGAGATGCGCCA	0.12;0.16;0.26;0.67	57100;58919;63658;74970	1.19E+00;6.53E-01;3.87E-01;1.05E-01	4664;15976;20715;22534	2.19E+00;1.28E+00;8.12E-01;7.09E-01
	BC049762	0.301737	1.1062	4	GAAGATCCACAAGAAGACCA;CTGTGTACCCTCAAACTCCC;CTCTCTGTAATGAAAGACCA;GGAGCCCAGGATCCTGTACA	-0.25;-0.13;0.51;1.07	36662;43552;71871;78665	5.43E-01;5.39E-01;4.34E-01;2.12E-02	969;7763;36083;42972	1.33E+00;1.33E+00;1.07E+00;6.91E-01
	Peg12	0.301689	1.07668	4	GGCGATGAGCCGGTCCACGT;ACAGCGACGCGGATCTCAGT;TCGGCCTTGAGGTATCCCCG;GGCGGCGCCCTACTGTGTGG	-0.44;-0.09;0.35;1.38	26296;45652;67210;79368	4.45E-01;4.26E-01;4.01E-01;5.79E-03	266;12424;33982;53338	1.88E+00;9.83E-01;7.49E-01;6.96E-01
	Mrpl37	0.301524	1.27058	4	TTACGGGACTCCGAAACGTG;CCGGCTTTGGCACTCCACTG;GCAAGAAGCACTTCGTCCCG;CAGAGTCTGTTCGTGGATCG	0.06;0.26;0.34;0.55	53984;63691;66552;72708	1.04E+00;8.13E-01;4.16E-01;1.58E-01	6926;13082;15943;25650	1.97E+00;1.59E+00;9.47E-01;5.77E-01
	Olfr803	0.301494	1.24949	4	ATAACGATCGTAAGACATAG;GAGAGTCCAACAATGTGAGG;TTAGGACCAGCATAAGTGGT;CTAAGAAGGAGAAATTACGA	-0.44;0.47;0.48;0.69	26387;70687;71038;75430	1.22E+00;5.14E-01;4.02E-01;9.42E-02	4204;8596;8947;53247	2.30E+00;1.25E+00;7.46E-01;6.99E-01
	Slc19a1	0.301156	1.11954	4	CATGGCCAGCTACTCACGGG;CCTGGAACGTAAATTCACCA;CCGGTGCATACTCAGCAGTG;TCTTTCTAAAGCGCCCTAAG	-0.19;0.11;0.12;1.16	40122;56802;56863;78968	6.09E-01;6.00E-01;3.80E-01;1.46E-02	666;22771;22831;39512	1.49E+00;1.22E+00;1.17E+00;6.02E-01
	Gm1123	0.301146	1.2551	4	TGCAAGGTGAAAACATACCC;GGGCTAAGAGTGAACATGCA;AGGACCTAATAATGAAGCGA;TAATGAGGCGATGGACCATG	-0.7;0.33;0.71;0.87	14800;66156;75688;77442	9.26E-01;7.69E-01;3.97E-01;4.85E-02	2193;3946;13478;64834	1.88E+00;1.79E+00;9.94E-01;3.57E-01
	Egfr	0.301126	1.11213	4	TGGGCCTGACTACTACGAAG;ACCAGACAGTCACTCTCTCG;CATGAATAGGCCAATCCCAA;GAGAACCTAGAAATAATACG	-0.3;0.19;0.22;1.09	33793;60622;61606;78759	7.03E-01;4.90E-01;3.78E-01;1.92E-02	875;18028;19012;45841	1.38E+00;1.37E+00;9.59E-01;7.35E-01
	Txnrd3	0.301083	1.11943	4	AATACAGCCTACGTTCACAC;ATAAAGAGTACTGTATTACG;GATGTTATAGACCACTCCCA;TTTGTGAATAAAGTGCACGT	-0.1;0.05;0.29;0.97	45085;53315;64877;78136	7.33E-01;5.32E-01;3.97E-01;3.30E-02	1498;14757;26318;34549	1.45E+00;1.15E+00;1.01E+00;8.64E-01
	Chrna5	0.301015	1.40317	4	CCACTAACTGAGATATTGCA;GCAGGGTATGATAAGAAACA;TGCAGACGGACGTTTCGAAG;CCAGGTCGATATAATCCTAG	0.23;0.25;0.36;0.36	62228;63029;67485;67489	1.49E+00;7.87E-01;4.30E-01;2.87E-01	12144;12149;16605;17407	2.64E+00;1.54E+00;9.99E-01;4.30E-01
	Mfsd6l	0.300832	1.13666	4	CTGATCGGAACAGAGACCTG;CCACCACTATCTTACCGCTG;ACTCCTCGAAAGGGTCACCG;GGTCTGCAGACCTATTTAGT	-0.07;0.09;0.29;0.9	47020;55441;64650;77651	7.90E-01;5.71E-01;3.95E-01;4.38E-02	1983;14984;24193;32614	1.55E+00;1.11E+00;1.03E+00;8.54E-01
	Gsdmc	0.300197	1.13481	4	ATGAAGTTTCTGAACAAACA;TCCCACAAATCTCATTGGAA;AGAGGCCTATGAAGTGACCA;GATGTCGAAACCATTGCAGG	-0.2;-0.19;0.6;0.99	39484;39653;73838;78273	6.34E-01;5.95E-01;4.26E-01;2.99E-02	1361;5796;39981;40150	1.56E+00;1.19E+00;1.19E+00;5.98E-01
	Dapk3	0.300108	1.14324	4	AAGTCGATGAGCTTAATGCG;GCAGTGTTATGATGTTGGGG;GCAGGTAGTGGACACCGTCT;CTCATAGTTCACGATCTCGG	-0.06;0.12;0.25;0.89	47265;57306;62892;77629	7.97E-01;6.12E-01;3.83E-01;4.43E-02	2005;16742;22329;32370	1.56E+00;1.20E+00;1.03E+00;7.81E-01
	Srsf3	0.299585	1.10365	4	TGGACCACTCAGAAGTGTGT;GTAAGAGTGGAACTGTCGAA;CTCCTGCGGTAATCATCTCG;CTTCTCTTTAGAACACTGTG	-0.53;-0.15;0.54;1.34	21568;42473;72606;79308	5.73E-01;4.30E-01;3.77E-01;7.10E-03	326;7028;37159;58063	1.79E+00;1.41E+00;6.64E-01;5.49E-01
	Fam171b	0.29956	1.17603	4	AAAGGAAACCACAAAAACGG;GTTCCTTACAGCCATATTAG;TTCAGCATAAATACGGACAC;GGACCGAAGAGGTCTATGGG	-0.35;0.14;0.7;0.71	30820;58082;75583;75608	7.60E-01;6.31E-01;4.48E-01;9.01E-02	4026;4051;21552;48814	1.85E+00;1.24E+00;8.50E-01;7.62E-01
	Supv3l1	0.299447	1.08518	4	AGGACCGCAGTACACGCCAG;CACAGTGCAAGAGACATGGG;AGCCGACAGATTGAAATTCG;TCAGCTCACACTTTAAAGAG	-0.29;0.04;0.17;1.28	33999;53280;59356;79226	5.31E-01;4.93E-01;3.75E-01;8.90E-03	408;20278;26354;45635	1.70E+00;1.01E+00;9.67E-01;6.65E-01
	Pank3	0.298882	1.2542	4	ACCTATTGACATCACAGCAG;CCAATATTCACTACCAGCAG;CTTTATCAGATTTCCAACCC;GCTCTGGAAATGGCATCCAA	0.13;0.17;0.17;0.72	57738;59574;59586;75821	1.22E+00;6.71E-01;3.75E-01;8.52E-02	3813;20048;20060;21896	2.24E+00;1.32E+00;7.82E-01;6.72E-01
	Zfp941	0.298836	1.23299	4	TGTTTGCTGACTGAAAGGTG;TACACAGTGTCAATGAACGT;ACACACAAAAACTTCAGCGG;AGAGCCAAATCCTACAAATG	-0.12;0.28;0.52;0.52	44191;64351;71926;71959	8.41E-01;7.08E-01;5.45E-01;1.76E-01	7675;7709;15283;35443	1.64E+00;1.41E+00;1.34E+00;5.46E-01
	Bptf	0.29854	1.30567	4	GACTCCTTAAGAATCAAACG;ATTTCATCGACGGGATGACG;CGATGACTCCGATTATCCGG;TGAGTTCCGATCTGGACAAG	-0.6;0.5;0.61;0.68	18595;71661;74024;75224	1.31E+00;6.45E-01;3.76E-01;9.89E-02	4410;5610;7973;61039	2.44E+00;1.59E+00;7.29E-01;4.62E-01
	Zranb2	0.298453	1.19096	4	ATCTAAGTATAAGCTAGATG;AACAGAAATAGGAAAGACAC;ATCTGATGGGGAATATGATG;ACAAAAAGAAAAGCAATAGG	-0.08;0.14;0.53;0.6	46370;57924;72346;73860	7.70E-01;6.27E-01;5.62E-01;1.31E-01	5774;7288;21710;33264	1.52E+00;1.38E+00;1.23E+00;6.36E-01
	Gm6583	0.298452	1.29251	4	CTGTTGAGAATGGTCATATG;CTGGATGTAGTCTTTCCACA;TTGCCCAACAGACAAAAAGG;CCTCGCGGTCCAGTAAGGAG	0.11;0.25;0.34;0.5	56364;63118;66741;71455	1.15E+00;7.90E-01;4.19E-01;1.88E-01	8179;12893;16516;23270	2.14E+00;1.55E+00;9.57E-01;5.28E-01
	Emilin2	0.298211	1.16387	4	CGGAGTGATAGAGCTGATCG;CTCCCCGACTTACACCAGGG;TGAATCACTCCGAATGTACG;GCTGGATCTCCAGTCCACCG	-0.15;0.23;0.41;0.7	42449;62051;69058;75578	7.51E-01;6.63E-01;4.60E-01;9.08E-02	4056;10576;17583;37185	1.47E+00;1.32E+00;1.10E+00;7.59E-01
	AI314180	0.298166	1.10518	4	GCCAAGATGTTGCCTCAAAG;CTCACCCGTAAGGCATCAGA;ATATCCTTAGTGAATAAATG;GGCTATTGGACGGTACATAC	-0.23;0.06;0.08;1.28	37658;54056;55199;79227	5.57E-01;5.45E-01;3.89E-01;8.88E-03	407;24435;25578;41976	1.70E+00;1.11E+00;1.05E+00;5.66E-01
	Rpl18a	0.29811	1.52015	4	CCAAAGTTCTTCACACGCAG;TCCGGGGAAATTGTGTACTG;TGACACAAAGTACCAGAAGC;CTTTCCACAGACCGAGACAT	-1.34;-0.05;1.1;1.48	1930;47901;78799;79447	1.39E+00;1.05E+00;4.63E-01;4.06E-03	187;835;31733;77704	3.19E+00;2.03E+00;8.17E-01;4.26E-02
	Slitrk1	0.297813	1.18326	4	TCCTGCACGTTGGAAAGCTT;TATTACGGGATATAGACCCG;AAACGCCCTAATCGGTCGAG;GCTTGCATGAGATCGTTCCG	-0.4;0.29;0.59;0.71	28274;64614;73696;75644	8.52E-01;6.26E-01;4.19E-01;8.93E-02	3990;5938;15020;51360	1.66E+00;1.54E+00;7.65E-01;7.62E-01
	Upf3b	0.297422	1.20078	4	TACAAAAGTTGGGACTATCG;CGATAGGCAGGATCGCAACA;TGAATGAAGAAAGAGCCAGT;AAATAATCGTGCTCAGGCAT	-0.03;0.25;0.3;0.67	49015;63148;65270;74981	8.54E-01;7.91E-01;4.01E-01;1.05E-01	4653;14364;16486;30619	1.66E+00;1.55E+00;8.82E-01;7.10E-01
	Spon1	0.297147	1.15276	4	GAACGTGGGCCTATCTGCAG;AGGTGGGTCCATCACACAAG;GTCCGAGAAGACTCATCCGA;TCACTGAAAGCACCCCTCGG	-0.06;-0.02;0.01;1.25	47506;49777;51534;79180	8.05E-01;4.82E-01;4.17E-01;9.91E-03	454;28100;29858;32128	1.65E+00;1.58E+00;8.80E-01;5.05E-01
	Lsm14b	0.29699	1.07211	4	AGTCGGCAAGAGCCCCATGG;ACCATTGAGCTGTGTCGCCG;ACCTTTGGCGAGCGCCACGG;GCGTTACCTGACCGCCTCCG	-0.3;-0.13;0.34;1.29	33457;43377;66582;79237	4.85E-01;4.33E-01;4.17E-01;8.66E-03	397;13053;36257;46177	1.71E+00;9.48E-01;9.47E-01;6.87E-01
	Olfr357	0.296877	1.12109	4	AGAGAGGAATCTGTTCAACT;TTGTAACATCTTGGGAACTG;TTGGGCTAAGCAGCCCACAT;AGTATTGAGGAGTAACGGAG	-0.35;-0.17;0.64;1.07	30952;40949;74588;78661	6.81E-01;4.50E-01;4.27E-01;2.13E-02	973;5046;38685;48682	1.68E+00;1.33E+00;8.55E-01;6.27E-01
	Eda	0.296874	1.32323	4	AGTTGCGGTCCGAATTGCGG;AAAGGCTGCTGTTGAAAGGA;ACAACTGTTATGGGACCACC;TGAAAAGGCATATTCTGAAG	0.19;0.21;0.29;0.49	60418;61555;64693;71404	1.37E+00;7.33E-01;3.95E-01;1.89E-01	8230;14941;18079;19216	2.47E+00;1.44E+00;8.56E-01;5.26E-01
	Tmem200c	0.296819	1.26724	4	ATGCCTATACCCATGATGAG;GAAGAGGCGTAAAAACGACG;AGATGAAGCCAGGTCCGGCG;GGGCAGTAGCCATCGCATTG	0.04;0.22;0.45;0.47	53118;61823;70312;70803	1.01E+00;7.43E-01;4.92E-01;2.04E-01	8831;9321;17811;26516	1.91E+00;1.46E+00;1.19E+00;5.06E-01
	Mpzl3	0.296777	1.13112	4	GGCCGGAAATGTCTACAAAG;AGCATCGGCACTTATCTCCA;TTTCCAGTACCCGACCACAG;GTGACCGTGAGCTCTGTTAG	-0.32;-0.22;0.66;1.06	32624;38388;74856;78639	7.00E-01;4.72E-01;4.27E-01;2.18E-02	995;4778;41246;47012	1.72E+00;1.32E+00;9.16E-01;5.72E-01
	Opa1	0.296607	1.11687	4	AGAGCGTGTCATCATCTCGC;AAGTGACAAGCATTACAGGA;AGGTTGTACTGTTAGCCCCG;GCGCCTGCGAGAGCTCGACA	-0.07;0.01;0.28;0.96	46739;51571;64465;78107	7.81E-01;5.05E-01;3.93E-01;3.36E-02	1527;15169;28064;32895	1.54E+00;1.14E+00;9.45E-01;8.46E-01
	Zfp976	0.296507	1.41572	4	TCATGAATTCGAAGATAGCA;AAGATAGGTGAGCTGTGCAA;TTTCGGAGATAACTCTGCTG;ACTTTACCAAGATGTCATGC	0.26;0.26;0.31;0.36	63477;63528;65316;67415	1.57E+00;8.06E-01;4.01E-01;2.89E-01	12219;14318;16107;16157	2.77E+00;1.58E+00;8.84E-01;4.29E-01
	Olfr456	0.29627	1.11647	4	GATTACAGACAGCCACAGAG;GGCCTGTGAGACACTGACAC;GGTGATACTAGCTTCTAGTG;GCAGGTAGGTGACCCCAAAG	-0.3;0.02;0.6;0.86	33584;52121;73884;77347	6.37E-01;5.13E-01;4.87E-01;5.06E-02	2287;5749;27513;46050	1.57E+00;9.78E-01;9.67E-01;9.51E-01
	Asb3	0.296049	1.1704	4	ATGTCGCTGATAACAGGGGA;TTGCATCTTGCTGTGAGTCA;TCACAAGCCCGGTTAGTACG;ATAAGATTGCTTCTTAAACA	-0.02;0.14;0.34;0.72	49780;58136;66755;75793	8.80E-01;6.33E-01;4.19E-01;8.59E-02	3841;12879;21498;29854	1.70E+00;1.24E+00;9.58E-01;7.79E-01
	Krt10	0.295811	1.17062	4	CTGAGTCAGGTCAACCCCTG;CAAATACTACAAAACCATCG;GGCTCATCAGGTGGTTACGG;AGAGTCAAACTACGAGCTGG	-0.02;0.03;0.48;0.69	49713;52379;71134;75381	8.78E-01;5.17E-01;5.17E-01;9.53E-02	4253;8500;27255;29921	1.70E+00;1.26E+00;9.77E-01;7.42E-01
	Stam	0.295179	1.10707	4	AGGTTGGCCAATCTCGCACA;GGAGCATGTGTATCAAACTG;AGATGTGCTGGGGTACAGCG;GTGAAACCCATCAAGGCGTG	-0.28;0.1;0.51;0.85	35101;55936;71779;77267	5.81E-01;5.39E-01;5.11E-01;5.24E-02	2367;7855;23698;44533	1.32E+00;1.13E+00;1.01E+00;9.64E-01
	Larp4	0.295084	1.06149	4	TGGTCCATCCCCCAATGACA;TACCAGAAACATCATAGAGT;AAGTAGTTAACTTACCCTCA;TCAGTTCGTCCCAATATGGA	-0.55;-0.08;0.3;1.52	20739;46265;65020;79469	4.49E-01;3.98E-01;3.75E-01;3.58E-03	165;14614;33369;58895	2.08E+00;8.71E-01;7.67E-01;5.24E-01
	Cactin	0.295001	1.15302	4	TCCCACAGGTCAGATTCGGA;AGAACACTTTAAGACGTGGG;GTGTACATGGAACTAGAGCA;TCTGTCTAAGAACATCTTGG	-0.27;0.25;0.49;0.71	35543;62987;71360;75611	7.85E-01;5.24E-01;5.19E-01;9.00E-02	4023;8274;16647;44090	1.54E+00;1.28E+00;1.03E+00;7.62E-01
	Pear1	0.294841	1.17852	4	AGGGGTTACTACGAGAGCAG;CTGTGCTCCTGGCTATATCG;GTTTGATTGCCAGTGCTATG;GGACATAGGTTAGCGCAGTG	-0.39;0.22;0.67;0.68	28807;61874;75007;75190	7.44E-01;7.12E-01;4.25E-01;9.97E-02	4444;4627;17760;50827	1.75E+00;1.46E+00;7.80E-01;7.26E-01
	NO_CURRENT_182	0.294691	1.19101	4	GCGCGTACATATAAATAGGT;GCGCTCGAACAAACATGGTC;GCGCGCGTGGATCACCCGCA;GCGCTACTCCCACCGATGTT	-0.06;0.23;0.37;0.63	47627;62427;67707;74401	8.09E-01;7.64E-01;4.34E-01;1.18E-01	5233;11927;17207;32007	1.58E+00;1.50E+00;1.01E+00;6.69E-01
	Prim1	0.294508	1.15601	4	TCCTTCCTGAATAGACCCAG;TGACAGACTACGATGACGTA;TATCGCTGGCTCAACTATGG;GGAGTACTTGAGTCTTGTAA	-0.49;-0.16;0.77;1.07	23462;41572;76451;78649	8.49E-01;4.28E-01;3.83E-01;2.16E-02	985;3183;38062;56172	2.05E+00;1.32E+00;6.42E-01;6.06E-01
	Atp7b	0.29423	1.08842	4	AAATATAGGCCAACTCCCGG;AGACCATCAATCCCATGACG;AGTTGTGTCATTACCCACAT;AAAATGGCTCCCGACACTAG	-0.3;-0.07;0.53;1.02	33603;46599;72351;78440	5.62E-01;4.87E-01;4.52E-01;2.62E-02	1194;7283;33035;46031	1.38E+00;1.24E+00;9.52E-01;7.77E-01
	Smim22	0.294205	1.10717	4	AAATGTGAGAAAGACCACAA;GCCACTGCAGAGGAAGTACT;CAGCGACGTCCCATTCCGAC;GGCTTTCTGATGAGGAGCTG	-0.49;0.19;0.44;1.04	23448;60618;69806;78563	7.03E-01;4.78E-01;3.83E-01;2.35E-02	1071;9828;19016;56186	1.38E+00;1.29E+00;1.15E+00;6.06E-01
	Qsox1	0.294061	1.22223	4	ACGCAAGATGTAGTGGAGTG;GCAGGCAAACCGATATAGTG;GGCGAGCGTTAACCCTGTTG;GCATCGCCTTCGCCCCGACG	0.04;0.21;0.31;0.61	53113;61429;65680;73994	1.01E+00;7.29E-01;4.05E-01;1.28E-01	5640;13954;18205;26521	1.91E+00;1.43E+00;9.02E-01;6.43E-01
	NO_CURRENT_263	0.293492	1.14941	4	TCTTGACTCCGACTTCGGGC;TGACAACCGCGGTACCTCTA;TCTTCTCGAGCGTGCGGGCC;TGACCCGTCTCTTCGCGCAC	-0.62;0.13;0.67;0.99	18048;57397;75060;78294	7.16E-01;6.14E-01;3.77E-01;2.95E-02	1340;4574;22237;61585	1.75E+00;1.20E+00;1.19E+00;4.46E-01
	Meltf	0.293092	1.32206	4	GAGAGATACTACGACTACAG;CTTGCCGCGAAGCTCGTCCA;ACAGGCATTAACCGGACTGT;GCCGAGCCGACATCACTGAG	0.17;0.21;0.37;0.43	59522;61195;67601;69623	1.32E+00;7.21E-01;4.32E-01;2.33E-01	10011;12033;18439;20112	2.39E+00;1.42E+00;1.01E+00;4.74E-01
	Ostc	0.293057	1.13177	4	GGCTCAATGACCGATGAACA;TCTTACTTCCTCATTACCGG;AGTAAACGGACAGTATATCA;GCGTACACCGTCATAGCCGA	-0.12;0.12;0.41;0.76	43978;57299;69138;76277	7.03E-01;6.12E-01;4.62E-01;7.48E-02	3357;10496;22335;35656	1.40E+00;1.20E+00;1.10E+00;8.29E-01
	Kat14	0.292861	1.12514	4	CCCATCGACTAACAGAAGTG;GCGAGTCTTACCATGAAACA;TTAGGAAAAAGACGTCGACG;TCGGCTTATGAACTTGACGG	-0.48;0.16;0.59;0.9	24137;59275;73604;77669	6.63E-01;6.21E-01;3.87E-01;4.34E-02	1965;6030;20359;55497	1.53E+00;1.30E+00;1.04E+00;6.27E-01
	Krt16	0.292792	1.12426	4	GACTGGTGGGGACGTCAATG;AGATCCGGGACTGGTACCAG;GAACTGTGCATTCTCCTGGG;AATCCCACAGACTCCCCCAG	-0.38;0.14;0.59;0.81	29490;58121;73673;76934	6.32E-01;6.25E-01;4.32E-01;5.99E-02	2700;5961;21513;50144	1.54E+00;1.24E+00;9.13E-01;8.04E-01
	Park7	0.292596	1.1286	4	CATCACGGCTACACTGCACG;GGATGTCATGCGGCGAGCCG;GTTCTCTCTCTAGTCGCCTA;CTCGCAGGGACCATACGATG	-0.17;0.23;0.24;0.87	40804;62398;62569;77469	7.63E-01;6.24E-01;3.81E-01;4.79E-02	2165;17065;17236;38830	1.50E+00;1.25E+00;9.99E-01;7.69E-01
	Thap1	0.292588	1.28605	4	CTGTGACCACAATTACACTG;CTCCCTCTTAAAGCAGTCCG;GAAAACCGACAGGTTATCAG;GGCGAGTAAGAGGAAACCTA	0.03;0.3;0.41;0.43	52686;64952;69049;69636	9.89E-01;8.68E-01;4.60E-01;2.33E-01	9998;10585;14682;26948	1.88E+00;1.69E+00;1.10E+00;4.74E-01
	Zfp341	0.292325	1.12637	4	TGACGGTGTATAGATGCTGT;ACAGTGACTGACCCAACCCT;GCATGGTACATACTTGTAGA;CTTCTTGTGCTGAATCATGT	-0.41;-0.01;0.7;0.89	27655;50187;75515;77624	7.54E-01;4.87E-01;4.13E-01;4.44E-02	2010;4119;29447;51979	1.84E+00;1.03E+00;8.95E-01;7.41E-01
	C2cd2	0.292314	1.27615	4	AACCTCGGTTTGACACTGGG;ATACTGACACGGGATAGCTG;CAGTGTAGTCAAGTCAACCC;GTTTCCCTGATAAACCACCC	0.17;0.19;0.19;0.63	59416;60292;60330;74367	1.31E+00;6.93E-01;3.75E-01;1.19E-01	5267;19304;19342;20218	2.38E+00;1.36E+00;6.94E-01;6.67E-01
	Smarcb1	0.291935	1.10762	4	CTGGCGGCGACTAGCCACTG;GTTCTACATGATCGGCTCCG;AGATCATGGATATACCACCC;TCTTCTTGTCCCGACCCATG	-1.12;-0.08;0.32;2.05	4317;46423;65951;79589	7.36E-01;4.50E-01;4.08E-01;9.60E-04	45;13684;33211;75317	2.65E+00;9.15E-01;7.72E-01;9.68E-02
	Olfr1402	0.291663	1.37398	4	GGAGCAATGGGACATCACAG;TGAGAACTGGATACCGAAGA;TTTACCTGACAACTCTCCTG;GCAGGGACTCAGGCCAACAG	-0.87;0.52;0.71;0.8	9447;72130;75613;76828	1.36E+00;7.62E-01;4.88E-01;6.23E-02	2806;4021;7504;70187	2.52E+00;1.86E+00;8.98E-01;2.19E-01
	C8b	0.29139	1.07731	4	TTGACTGTGAGCTATCCACC;AAAGACGCCATGGAGCAAGG;CAAGGACAGAGCGCGCGTGG;ATTGTGTGACTTGTCCGACA	-0.31;0.13;0.31;1.04	33381;57366;65485;78525	6.14E-01;4.83E-01;4.03E-01;2.43E-02	1109;14149;22270;46253	1.27E+00;1.20E+00;9.44E-01;8.93E-01
	Olfr328	0.291231	1.31261	4	CCGGGATCCACAGATTGGGA;TCCTGTACCTGTCAATAGGA;GATGACAGATGGCTACATAG;AAAGGAGGAGACAAATCCTG	0.01;0.38;0.38;0.4	51318;67918;68108;68743	1.02E+00;9.36E-01;4.41E-01;2.55E-01	10891;11526;11716;28316	1.96E+00;1.80E+00;1.04E+00;4.54E-01
	B2m	0.291203	1.2442	4	TGAGTATACTTGAATTTGAG;ACTCACTCTGGATAGCATAC;ATTTGGATTTCAATGTGAGG;TCGGCTTCCCATTCTCCGGT	-0.03;0.28;0.44;0.47	48963;64321;70069;70818	8.52E-01;8.39E-01;4.85E-01;2.04E-01	8816;9565;15313;30671	1.66E+00;1.64E+00;1.17E+00;5.07E-01
	Vmn1r58	0.291105	1.49698	7	TGACCCTAGCCCAGGTACCA;GCTTAGGAATATGATGTCAT;TTCAATATGCTCCATCTCTG;TCTGTGTAGGTGAATCACCA;AACAATAGCTCACAACCTTG;CAAATGTGACCACCAGCATC;TTCTTTCACATGGTGGCACG	-0.76;-0.73;0.11;0.29;0.55;1.1;1.48	12868;13675;56521;64857;72659;78784;79446	1.15E+00;1.05E+00;1.01E+00;9.92E-01;6.17E-01;4.06E-01;7.15E-03	188;850;6975;14777;23113;65959;66766	2.64E+00;1.79E+00;1.79E+00;1.66E+00;1.65E+00;5.36E-01;4.11E-01
	Ankrd53	0.290895	1.13366	4	CCCCGCCCATCTGTACAAGG;CAAAGTCTGCAATAGTCGAT;GGAGATCATAGTCGACGACA;TTTATGGCTCCACAACTCGG	-0.11;0.11;0.43;0.73	44871;56506;69618;75980	7.27E-01;5.94E-01;4.73E-01;8.16E-02	3654;10016;23128;34763	1.44E+00;1.16E+00;1.14E+00;7.97E-01
	Ddx43	0.290341	1.13638	4	TTGAAGGGCTAATTCCCGGG;TGTTAGATGTACGCCCAGAC;AGGCATACCTGAATCGGTGT;TCTTAAAAACAGGTCGTGGT	-0.22;0.28;0.33;0.78	37905;64160;66301;76565	8.33E-01;5.62E-01;4.13E-01;6.83E-02	3069;13333;15474;41729	1.63E+00;1.12E+00;9.33E-01;8.63E-01
	Tmcc1	0.290207	1.18149	4	AAATTTGTTCCGAATCAGTG;AAGTCCAAAATATGGTAGTG;ACAAGCTTGCATAGTAGGCG;GTCTTCAGGGACATGCACCA	-0.05;0.21;0.38;0.62	48080;61322;68098;74190	8.23E-01;7.26E-01;4.41E-01;1.23E-01	5444;11536;18312;31554	1.61E+00;1.43E+00;1.04E+00;6.55E-01
	Slc6a12	0.290083	1.10925	4	GATGGAGTTTGTGCTGTCAG;TCTTGGGCCTCATGTAGGTG;CTGAATCACTCATCGGCCAG;GGGAATACCCATTTCTGAAG	-0.16;0.06;0.08;1.18	41891;53958;54970;79042	6.50E-01;5.43E-01;3.90E-01;1.29E-02	592;24664;25677;37743	1.54E+00;1.30E+00;1.04E+00;5.62E-01
	1600002H07Rik	0.28986	1.12104	4	GAACACAAGACCAAACTACT;AGGCGCACGCACGGATCCTG;GGAGCCTGCGCGTTTCCAGG;TTGGGTACAAGATCCACCAA	-0.46;0.3;0.31;1.01	25060;65147;65463;78408	8.77E-01;4.03E-01;3.92E-01;2.69E-02	1226;14171;14487;54574	1.71E+00;1.23E+00;8.91E-01;6.56E-01
	Amn	0.289787	1.12015	4	CCAGAACCGGACCCCGTGCG;GCGCGATGGATCTTTCCGCG;ACAGACGCAGCCCGACGCGT;GCAGACGTTCTCGCGCGACG	-0.21;-0.05;0.62;0.81	38457;47914;74211;76846	6.57E-01;5.73E-01;4.63E-01;6.19E-02	2788;5423;31722;41177	1.62E+00;1.15E+00;9.00E-01;8.18E-01
	Plekhg2	0.289515	1.13849	4	CCCCTCTAAGACGTGCAGTG;TTAAATCCTAAGGGGTCCCG;TCGCGACCTTCGCAGCATCG;GTCCCCGACGGGTCCAACGT	-0.09;0.2;0.21;0.84	45736;60810;61512;77143	7.52E-01;7.09E-01;3.77E-01;5.52E-02	2491;18122;18824;33897	1.48E+00;1.39E+00;9.44E-01;7.32E-01
	Xlr5c	0.289384	1.18852	6	AAAGAGGAAACAGTTTGAAG;GCAGCTGACAAACCAGCAGT;TTCAGGATCAGACATGCAAG;GTCGGTGTACCACAATTGGC;GTACTGTGAAAGATTTGGGT;TCTTGAAGTCATCTGATGGG	-0.76;-0.16;0.07;0.15;0.59;1.84	12826;41754;54798;58719;73592;79574	7.04E-01;6.75E-01;5.14E-01;5.13E-01;3.96E-01;1.93E-03	60;6042;20915;24835;37879;66808	2.35E+00;1.20E+00;1.17E+00;1.12E+00;8.38E-01;4.58E-01
	Malt1	0.289333	1.23087	4	AGCTTGGACCGCGCTCCGGA;GTCCTATGCCTCACTACCAG;ATATGAGATGTGTAACGCTG;CCACTGGCTAAATTCAAAAG	0.0;0.27;0.35;0.54	50981;64025;66949;72399	9.23E-01;8.27E-01;4.22E-01;1.65E-01	7235;12685;15609;28653	1.78E+00;1.62E+00;9.68E-01;5.64E-01
	Zfp1	0.289317	1.2524	4	AGGATGCCATCTTTAAACAT;CTGAGTATTCCAGTCCAGCG;GAACGATGAGGTTTGACTGG;CATGTACAGAATCCTCTGCG	0.04;0.28;0.33;0.51	53090;64257;66166;71823	1.01E+00;8.37E-01;4.11E-01;1.79E-01	7811;13468;15377;26544	1.91E+00;1.63E+00;9.26E-01;5.41E-01
	Spire2	0.289266	1.07081	4	GGGACGGTTCGGTTGGCGCG;GTACGAGCAGCCCATCAACG;CTGCATCAGCATCTCGAAGG;GGTCGTGTTCCGAAAAAGAG	-0.28;0.08;0.31;1.04	34927;55236;65664;78548	5.67E-01;5.08E-01;4.05E-01;2.38E-02	1086;13970;24398;44707	1.28E+00;1.10E+00;1.00E+00;9.01E-01
	Zfp12	0.289212	1.25996	4	CCCTATGTTTGTCACGACTG;CCCGAGGAAACACACCCTGG;TTCTCACAGGAGTTGCACTG;CTGCGACTGGAATGACGCTG	0.1;0.22;0.32;0.51	55975;62025;65953;71887	1.13E+00;7.50E-01;4.09E-01;1.78E-01	7747;13681;17609;23659	2.11E+00;1.47E+00;9.16E-01;5.43E-01
	Rpap3	0.289185	1.15133	4	CAATTGAGTGCTACACCCGC;CTTGGTGTAAGTCCTGCTCA;GCTGTGGATAATCCTCCTCG;GGGGAGAGCAAACCAACCGG	-0.28;0.27;0.49;0.68	34734;63891;71348;75133	8.21E-01;5.24E-01;5.05E-01;1.01E-01	4501;8286;15744;44900	1.61E+00;1.28E+00;9.95E-01;7.22E-01
	Guca1b	0.289008	1.2543	4	GCTGAAGAAAGCCTGCCGAG;GCCCTGAACCTCGTGCTGAG;TTTGTCGTGGAGTGTCCCAG;CCGAGCCTTCGACAAGAATG	-0.06;0.34;0.41;0.46	47235;66810;69105;70566	9.61E-01;7.97E-01;4.61E-01;2.10E-01	9068;10529;12824;32400	1.85E+00;1.56E+00;1.10E+00;4.99E-01
	Omd	0.288378	1.1962	4	GCCAATATGAAGCTTACCGA;AGATTAGAATCAATGCCCCT;TTGTCACAGTACATTGATGT;AGATTTCATTATAACCAAGA	-0.5;-0.44;0.74;1.36	23115;25984;76091;79333	8.09E-01;5.38E-01;3.82E-01;6.56E-03	301;3543;53650;56519	1.96E+00;1.83E+00;5.96E-01;3.99E-01
	Tmco5b	0.28796	1.21517	4	ACCTTGAAAAGGATCTACAG;AGAAAGAAGAATCTATACAA;GTCCTGTGCACAACAAGAGA;GAAATACCAAGAAATTCTGA	-0.01;0.24;0.39;0.53	49941;62810;68523;72244	8.86E-01;7.78E-01;4.49E-01;1.69E-01	7390;11111;16824;29693	1.71E+00;1.53E+00;1.06E+00;5.57E-01
	Pbk	0.287881	1.10993	4	TGAATGACTTAATAGAAGAG;TCTCAGAGTTGCTTTGCACA;GTTATATTGGTACTGAGCCA;AGGGATATTTACACATGGAG	-0.07;-0.06;0.41;0.86	46826;47668;69128;77389	7.84E-01;4.62E-01;4.60E-01;4.97E-02	2245;10506;31963;32809	1.54E+00;1.10E+00;9.85E-01;8.10E-01
	Myh8	0.287818	1.16978	4	TGACCTTAGCAGTAATGCAG;GATTATAACAAGAACCCAGG;GTCTGCAAAGGTGTATAATG;GAATCCACTTCGGTACCACG	-0.07;-0.05;0.63;0.65	46777;47804;74354;74690	7.82E-01;6.66E-01;4.62E-01;1.11E-01	4944;5280;31830;32857	1.64E+00;1.54E+00;8.14E-01;6.88E-01
	Cyp2j5	0.287584	1.2456	4	GGAGTTGGGCCAATCACCAG;CCTGGTGGAAGCCATAAGAG;CCGGTTAGAGAACGAATCAC;GAAGATATTTCATTATACAT	0.07;0.21;0.37;0.5	54694;61223;67723;71595	1.07E+00;7.22E-01;4.34E-01;1.85E-01	8039;11911;18411;24940	2.02E+00;1.42E+00;1.01E+00;5.32E-01
	Cavin4	0.287363	1.16585	4	CTAGGATAGTCACTCCTGAG;TCCCCCAATAGAGCTCTCCT;TAACAACAGACAGGGATGCG;TCTGTCCAGCACGGTCACAA	0.02;0.12;0.31;0.7	51846;56916;65704;75513	9.56E-01;6.03E-01;4.06E-01;9.23E-02	4121;13930;22718;27788	1.83E+00;1.18E+00;9.03E-01;7.53E-01
	Ache	0.287358	1.10633	4	GACCCCGTAAACCAGAAAGT;CAGCAGACCTACATTGCCAG;CAGTATGTGCATGCCCACGG;AAATGTCTGCTACCAGTACG	-0.06;-0.04;0.17;1.09	47202;48650;59302;78733	7.95E-01;4.70E-01;3.75E-01;1.97E-02	901;20330;30984;32431	1.56E+00;1.36E+00;8.42E-01;6.64E-01
	Shc1	0.287325	1.0786	4	GTGCCAAAGGGGCGACAAGG;TTTGTCAATAAGCCCACACG;GATAGATTGCATGTGATGGT;TTACCAGTGTAGCTCCCAAG	-0.63;0.1;0.32;1.36	17573;56227;65845;79334	5.88E-01;4.07E-01;3.79E-01;6.54E-03	300;13789;23407;62061	1.83E+00;1.14E+00;9.10E-01;4.33E-01
	Asb9	0.286989	1.13319	4	GCTGGCCTCTCCCATCCATG;CTGACACATGCATTAAACAA;GCAAGTGTGTTACTAAGTCA;CTTTCAAACCCGTTGATGGG	-0.41;0.3;0.45;0.81	27711;65093;70167;76896	8.74E-01;4.88E-01;4.14E-01;6.08E-02	2738;9467;14541;51923	1.70E+00;1.18E+00;9.07E-01;7.43E-01
	Zfp579	0.2869	1.27248	4	ACACACAAAAGGTCGATCGG;TCCTTGGCCTCTGATTCCCG;AGTGGAACAGCCCGCCACGG;TGGCGAAGGCTTCGCGACAG	0.04;0.27;0.41;0.42	53156;64007;68965;69469	1.01E+00;8.26E-01;4.58E-01;2.37E-01	10165;10669;15628;26478	1.91E+00;1.61E+00;1.09E+00;4.70E-01
	Mkrn3	0.286843	1.15727	4	GGAGAAATATGCGACATGTG;GAGCCTCGGGACCATGCGGG;TCTGGTCCGGAGCGCAACAG;TCAGCAGCCGAGCCAATCAG	-0.02;0.0;0.49;0.67	49791;51132;71378;74978	8.81E-01;5.25E-01;4.99E-01;1.05E-01	4656;8257;28502;29843	1.71E+00;1.29E+00;9.29E-01;7.09E-01
	Pxn	0.286734	1.09251	4	GTCCGACCTGAACAAGCTAG;TGGCTGGAGGTGACTCGCTG;CCCACCACCACCGTCCAGCG;AGAAAATAACACTCCCTTGG	-0.72;0.1;0.13;1.62	14338;56335;57797;79522	5.90E-01;4.01E-01;3.77E-01;2.42E-03	112;21837;23299;65296	2.25E+00;1.15E+00;6.24E-01;3.45E-01
	Ffar4	0.286642	1.1852	4	CAGCGTCACGATCCTCACAC;CGACGCTCAACACCAACCGG;TTGGATTGGCCCAACCGCAT;AGCGCACGACGAGCACTAGA	-0.03;0.08;0.55;0.56	48837;55041;72642;72914	8.48E-01;5.74E-01;5.63E-01;1.53E-01	6720;6992;24593;30797	1.65E+00;1.41E+00;1.09E+00;5.87E-01
	NO_CURRENT_299	0.286526	1.16359	4	TTTCTAGGGCCGCCGCCCGC;TTTGACATTTTCGTCTCGCG;TTTCATCACACCGGCCAATG;TTTCTAATTACCCGATACGT	-0.01;0.11;0.4;0.65	50289;56455;68716;74696	8.98E-01;5.93E-01;4.53E-01;1.11E-01	4938;10918;23179;29345	1.73E+00;1.16E+00;1.08E+00;6.89E-01
	Paf1	0.285956	1.50379	4	GCAATCTTATAGTCATACCT;TGTGAAACAGCAGTTCACAG;AGCATGCAAAGGTGGTACCG;GCCCCGAGTGACACCAGTGG	-0.85;-0.73;1.07;1.65	9874;13738;78681;79534	1.34E+00;9.13E-01;4.77E-01;2.16E-03	100;953;65895;69760	3.08E+00;2.30E+00;4.08E-01;2.30E-01
	Hfe	0.285683	1.07044	3	CATGAAGACAACAGTACCAG;TGCTCCACGTACCCTTACTG;GATCCGTGCCAAACAGAACA	0.13;0.22;0.51	57344;61730;71860	7.71E-01;3.92E-01;1.34E-01	7774;17904;22290	1.66E+00;9.30E-01;6.23E-01
	Nefm	0.285659	1.07161	4	TCTCCTTAGGAAACTCCTAG;CCGCTACGCCAAGCTCACCG;GTCTCCCGTGAAGTCTCCTG;GGTCCAACACAAATTTGTGG	-0.26;0.11;0.35;0.94	35988;56562;66984;77994	5.95E-01;5.26E-01;4.22E-01;3.61E-02	1640;12651;23072;43648	1.16E+00;1.11E+00;1.04E+00;9.70E-01
	S1pr1	0.285599	1.17674	4	CTGAAGATGAAACTACACAA;GTCCGGCATTACAACTACAC;GCCTGCTAATAGGTCCGAGA;GGCAGGTGTGAGCTTGTAAG	-0.29;0.31;0.52;0.6	34475;65687;71945;73753	9.02E-01;5.45E-01;5.01E-01;1.33E-01	5881;7689;13947;45158	1.75E+00;1.34E+00;9.85E-01;6.30E-01
	Ncapd2	0.285466	1.23079	4	TTGCTAACATCTCGGACAGG;ACTTGAGAAGAACGCCACTG;ACACTGAATGGTCCCGACGG;ATGAGAACACAACTACAGGT	-0.43;-0.35;0.93;0.99	26775;30956;77931;78251	1.10E+00;4.70E-01;4.05E-01;3.04E-02	1383;1703;48676;52859	2.58E+00;1.18E+00;7.12E-01;4.50E-01
	Nsf	0.285429	1.08656	4	ACAAGTACATATTTACGCTG;TTTCAGACATACCGATAACG;TGGTTTGATATCGTTCTCCA;CCGGAGATCGTGGAACAGAT	-0.51;0.18;0.42;1.05	22582;60004;69313;78607	6.84E-01;4.66E-01;3.80E-01;2.25E-02	1027;10321;19630;57052	1.35E+00;1.30E+00;1.12E+00;5.79E-01
	Acss3	0.285378	1.21578	4	AGGCACGCAGTCATGAGACT;CTTTACCCCAGAATCTTTCG;TACGCGCATTGATCATGCGA;GTGATGTGGAGACCCTAGAA	-0.24;0.37;0.48;0.52	37153;67859;71119;72103	1.02E+00;5.48E-01;5.16E-01;1.73E-01	7531;8514;11775;42481	1.96E+00;1.26E+00;1.09E+00;5.52E-01
	Nav1	0.285264	1.10103	4	AAGACGATGACATCACAACG;AAACCTAGCCGGATTCCTCG;GGGGCTTCTTAGCATCACTC;TTTGTGTCAGGCTAACCTAG	-0.36;-0.27;0.58;1.19	30343;35580;73357;79063	6.08E-01;4.42E-01;4.36E-01;1.25E-02	571;6277;44054;49291	1.55E+00;1.50E+00;8.33E-01;5.19E-01
	Fem1a	0.285023	1.21774	4	GGTAGCGCGCGATCTCGCGG;TTACAGATCCTGATGAAATG;GGTGTGCCCGGTGACGCTGG;GCGATGGAACTCCGTCACCA	-0.79;0.3;0.68;0.96	11650;64902;75177;78086	8.65E-01;7.25E-01;4.39E-01;3.41E-02	1548;4457;14732;67983	1.78E+00;1.69E+00;1.13E+00;2.75E-01
	Olfr958	0.28494	1.1064	4	GGGAAATGTATCTATCCTTG;AGAGTGAGCTTCACTAATGT;ATGATGACCGAGTACCGAAG;GGGAAGTTAAGACGCTGGAG	-0.28;0.19;0.46;0.77	34897;60276;70488;76495	6.92E-01;5.08E-01;4.97E-01;6.98E-02	3139;9146;19357;44737	1.36E+00;1.21E+00;1.00E+00;8.55E-01
	Ndufaf2	0.284868	1.07901	4	TTGGAGCGCCTTGTCCAGGG;CAGGAGACATCCCAACCGAG;ACGTGGGCACGGACCATCTG;ATTCTTACCTCCATAGTGGG	-0.24;0.15;0.26;0.96	37348;58755;63522;78091	6.49E-01;5.51E-01;3.86E-01;3.40E-02	1543;16112;20879;42286	1.27E+00;1.14E+00;1.10E+00;8.06E-01
	Zc3h12b	0.284718	1.07736	4	TCATCAGCCACCGAACGCTG;AGGCAGGGTGACCGACAGAG;ATGGAAGTAATGTGGCAATG;TACCTGTAATTGGTGCATCG	-0.13;-0.1;0.26;1.11	43356;44992;63680;78818	6.86E-01;4.41E-01;3.87E-01;1.79E-02	816;15954;34642;36278	1.40E+00;1.37E+00;8.12E-01;7.30E-01
	Gsap	0.28429	1.06593	4	ACACCCTGTTAACAACGTGA;ACTATCACAACAGCGTCGTG;AGAATAGCAGTCCAGAACCA;CCAGTTAACGTTATGTCCAA	-0.19;0.03;0.3;1.0	39784;52559;64949;78344	6.01E-01;5.20E-01;3.98E-01;2.83E-02	1290;14685;27075;39850	1.21E+00;1.20E+00;9.84E-01;8.67E-01
	Tspan33	0.284226	1.13085	4	AAGGCAGATGTTCTCCCGAA;GCCAGGCTAATGAAGCACGC;GAATATGTACTTCAACTGCT;CGTGCATTATCGAGATGACC	-0.25;0.28;0.38;0.73	36746;64221;67905;75940	8.35E-01;5.40E-01;4.37E-01;8.25E-02	3694;11729;15413;42888	1.63E+00;1.08E+00;1.02E+00;7.93E-01
	Nphs2	0.284109	1.06135	4	GCTGGAGAGCGAGCGACCAG;TTGTGATAGGTGTCCAGACA;ACTGCATCTAAGGCAACCTG;AGAGTAATTATATTCCGACT	-0.4;0.03;0.46;1.04	28311;52435;70575;78567	5.18E-01;4.99E-01;4.19E-01;2.34E-02	1067;9059;27199;51324	1.29E+00;1.21E+00;9.79E-01;7.63E-01
	Psmg1	0.284007	0.972969	3	CACACAGAAAACATCTGTAG;GATGTGCCGGCATGTGAGAA;AGTCAAGTCTCACATACCGA	-0.18;-0.01;1.04	40631;50196;78551	4.35E-01;3.56E-01;1.78E-02	1083;29438;39003	1.40E+00;9.30E-01;5.88E-01
	Cyp2j13	0.283971	1.17905	4	CAACATCCTCAACACTACGA;CTGGAACGAGTTGCCCACAA;CTTAGAGCATCGAATTCAGG;GCTTACATGGACCATTAGGG	0.04;0.08;0.4;0.62	52817;54905;68851;74223	9.94E-01;5.61E-01;4.56E-01;1.22E-01	5411;10784;24729;26817	1.89E+00;1.08E+00;1.08E+00;6.57E-01
	Gal3st1	0.283542	1.06706	4	ATACAGTGGAGGTACCACAT;AGGCTTCGTGCAAAGTACGA;ATGAACACAATATCTCGCCG;TCGGGTCGTAGTAGCGATCG	-0.23;-0.17;0.43;1.1	37548;41328;69586;78791	5.55E-01;4.73E-01;4.27E-01;1.85E-02	843;10048;38306;42086	1.39E+00;1.14E+00;1.11E+00;6.36E-01
	Stk36	0.283018	1.14778	4	GGCCTTTAGTCCAGGCACGG;TTGGCGAGAAGAATGTTCTG;AGCTGGATAGGAGACTACTC;GGGTAGGCGACTAGTAAATG	-0.0;0.1;0.34;0.7	50624;55893;66731;75501	9.10E-01;5.81E-01;4.19E-01;9.26E-02	4133;12903;23741;29010	1.75E+00;1.13E+00;9.56E-01;7.52E-01
	Olfr67	0.282897	1.09864	4	ACTACCAAAGGATATACCCC;CATCTGTTCTATGTACATCG;AATACAGAAGTCGATATACC;CATCATATATGGGCTGACAA	-0.51;0.09;0.61;0.94	22726;55796;73983;77961	6.43E-01;5.79E-01;3.80E-01;3.69E-02	1673;5651;23838;56908	1.58E+00;1.12E+00;1.10E+00;5.84E-01
	Arhgdia	0.282879	1.1587	4	CATTGTGACTCGACTGACCT;GTGTTGGATGTACTTCATGC;AAGCCTCCGAAAGTACAAGG;CCTGTCAGGTCCAGTTCCAG	-0.06;-0.04;0.59;0.64	47690;48500;73643;74480	8.11E-01;6.23E-01;4.68E-01;1.16E-01	5154;5991;31134;31944	1.59E+00;1.54E+00;8.37E-01;6.74E-01
	2810004N23Rik	0.28275	1.11436	4	CATAGCCCGTGATCCCAAAG;GTCGTAGAGGGTCCGCAGAA;CTGCCTGGATCTCCTGTACG;TTCTTTGCAGAATAAAACAA	-0.41;0.03;0.69;0.82	27638;52601;75324;77037	7.37E-01;5.20E-01;4.13E-01;5.76E-02	2597;4310;27032;51996	1.80E+00;9.86E-01;9.28E-01;7.41E-01
	Gp5	0.282708	1.21139	4	TCTGTTCGAGAACCCCCTGG;GAGGTTTCCGGATAGAGTCA;ATCTTATCCAGGATCGCACG;GAATGGACCAGGGCATATTG	-0.02;0.29;0.31;0.55	49708;64765;65487;72741	8.78E-01;8.59E-01;4.03E-01;1.57E-01	6893;14148;14869;29926	1.70E+00;1.67E+00;8.93E-01;5.79E-01
	Dnaja1	0.282681	1.07132	4	TAAAACCGTCTAGGCCGAGG;TGATAAGAATCCAAATGAAG;CTGTGTTTAGGCATGAAAGA;TGTTTGTATTGCTATAGGCG	-0.15;0.03;0.3;0.96	41981;52280;64962;78117	6.52E-01;5.16E-01;3.98E-01;3.34E-02	1517;14672;27353;37652	1.30E+00;1.14E+00;9.73E-01;8.68E-01
	Krtap24-1	0.282658	1.19556	4	CAAGGCACACAGGAGTCCGT;GCTGGGTAAGTAAGGTCCAA;GGCCTGAAGATTCTTAGGGA;GCGTCACGGGGATGTAGCAG	-0.09;0.24;0.49;0.5	45464;62527;71282;71494	7.68E-01;7.44E-01;5.22E-01;1.87E-01	8139;8352;17107;34170	1.51E+00;1.47E+00;1.28E+00;5.29E-01
	1810055G02Rik	0.282615	1.09748	4	CTGCAGCAAGAGTCGCCGTG;CACCACCCAGGTACAAACCA;GAGCACTCCAACAACCAGAG;GAAACATAGTCACTAACAAG	-0.22;0.21;0.31;0.83	38192;61342;65329;77132	7.26E-01;5.68E-01;4.02E-01;5.54E-02	2501;14306;18292;41442	1.43E+00;1.13E+00;9.42E-01;8.85E-01
	Il11ra1	0.282325	1.14316	4	GTGCGTCCTGATCCACCCCA;AGACATAAGTGCCTTCATCA;TCCTGAAGTCTCCTGCCAAG;TAGGAAGTAAGGTAGCGGGT	-0.4;0.26;0.58;0.7	28121;63308;73368;75503	7.98E-01;6.09E-01;4.18E-01;9.25E-02	4131;6266;16326;51513	1.56E+00;1.50E+00;7.57E-01;7.52E-01
	Afg3l1	0.282293	1.11025	4	TCCTCCTATATGCTATGAGG;CTTCATCACCGTGAATGGGT;TTTGACCGTCAGATCTACAT;GGTAGTTCGGTACCTCTGGG	-0.14;-0.06;0.55;0.77	42907;47659;72785;76505	6.75E-01;5.81E-01;4.60E-01;6.96E-02	3129;6849;31975;36727	1.43E+00;1.34E+00;8.56E-01;8.10E-01
	Tnrc6c	0.282227	1.12114	4	CATTATGAAAATTCCCACTG;AAGGTGGACATGGACAAACG;GGAATGATGCCACGAGATGT;CCATTAGAAGAACTTCGGCT	-0.08;0.1;0.39;0.72	46247;56222;68356;75784	7.67E-01;5.88E-01;4.46E-01;8.61E-02	3850;11278;23412;33387	1.51E+00;1.14E+00;1.05E+00;7.78E-01
	Olfr482	0.282153	1.08	4	CAACTTGACACAGACTTGTG;AACATGAGGTAACAGCCACA;CTAAGTCAACAGAAGCCAAG;AAATATAGAAACAGTGACAA	-0.12;0.02;0.28;0.95	44137;51750;64483;78019	7.07E-01;5.08E-01;3.94E-01;3.56E-02	1615;15151;27884;35497	1.40E+00;1.12E+00;9.52E-01;8.46E-01
	Nckap1	0.28208	1.08137	4	AAATACAAGTACTCACGCGT;GCAGGATTAAGCATTGTGCT;TTCCACCAACATTTCAACCA;GGGAGCACACCTTCACGCCG	-0.1;-0.04;0.32;0.95	45204;48290;65960;78040	7.36E-01;4.66E-01;4.09E-01;3.51E-02	1594;13673;31344;34430	1.46E+00;1.12E+00;9.16E-01;8.30E-01
	Tril	0.281601	1.06744	4	GCATTAAGGTTGAGCCGGCG;CGAGAAGCTCTCACGACTAG;ACATCTCCTATGCACCAACA;GCTGCAGAATGGGTCTTGCG	-0.27;0.02;0.47;0.9	35603;52014;70814;77691	5.20E-01;5.12E-01;5.07E-01;4.29E-02	1943;8820;27620;44030	1.24E+00;1.04E+00;1.03E+00;9.63E-01
	Nt5c3	0.281573	1.09371	4	CCAGCAGAAAATATGAACAC;TCTCACTTACTATGACACGT;CTCACCACTCTACCATGTAA;AGAGTAGAAGAAATTATCTG	-0.15;0.0;0.05;1.23	42317;50818;53406;79130	6.60E-01;4.95E-01;4.01E-01;1.10E-02	504;26228;28754;37317	1.60E+00;1.32E+00;9.20E-01;5.34E-01
	Fam69a	0.281571	1.1065	4	ATTTGACACTTCACAACACC;GTATGGAATAAGTCTACCAT;ACAGAATCCCATTAGTTTGG;TGAGATTAACCAATTCAGAG	-0.02;-0.01;0.24;0.92	49400;50146;62837;77823	8.67E-01;4.86E-01;3.82E-01;3.99E-02	1811;16797;29488;30234	1.68E+00;1.07E+00;8.93E-01;7.79E-01
	Dnajc18	0.28129	1.1728	4	AACAGCTACGTGGGGTACAA;GCCGGCGACACCGCCACGAG;ACAAATACCCAGAAGACAAG;AGAATGAGTGGAATCAGACG	-0.28;0.33;0.49;0.59	35056;66167;71208;73569	9.26E-01;5.19E-01;5.10E-01;1.38E-01	6065;8426;13467;44578	1.79E+00;1.27E+00;1.01E+00;6.19E-01
	Rfx3	0.281104	1.07621	4	ACAGAGAATGATTCAAACCA;ACCAGTACCCACCATACTGT;GGACAATTATGAGACAGCGG;TCTTTATCGAGAGCACTGTG	-0.29;-0.12;-0.0;1.54	34099;44063;50576;79488	4.95E-01;4.36E-01;4.27E-01;3.17E-03	146;29058;35571;45535	2.14E+00;9.71E-01;7.05E-01;4.92E-01
	Trappc5	0.280764	1.20155	4	GGACTCGGGCGCCCACCTGT;CAGCACCTTAGTCTCACGCC;GCACTTTCTACATCATCGAG;TCTTCGTCAAGGGTGCGGTG	0.07;0.17;0.28;0.61	54663;59512;64203;73944	1.07E+00;6.70E-01;3.91E-01;1.29E-01	5691;15431;20122;24971	2.01E+00;1.32E+00;8.34E-01;6.40E-01
	H2-M9	0.280651	1.14359	4	GTGGATGAAACACAGATCAT;ATCGAATAATAATTCCATGA;GCATTTAGCTCATTCAACCA;TCATGCTATCATTATAGATG	-0.24;0.16;0.59;0.6	37177;59286;73697;73825	6.63E-01;6.26E-01;5.48E-01;1.32E-01	5809;5937;20347;42457	1.54E+00;1.30E+00;1.09E+00;6.34E-01
	Bet1	0.280543	1.22664	4	TCACAATTTGATTCTACAAC;AAGTCTGAGAAGCAAAGTAA;GAGCACCTCCTGGCAGCTAT;ACAAGCATTATAACCAGTAT	-0.03;0.27;0.43;0.45	49191;63803;69745;70184	8.60E-01;8.18E-01;4.77E-01;2.19E-01	9450;9889;15831;30443	1.67E+00;1.60E+00;1.15E+00;4.88E-01
	Cald1	0.280506	1.208	4	GGCTGATCGAAAAGCTAGGG;TCGCTCAGGACGGTATGAGG;TTTGATCCGACCATAACAGA;CTGGCTTAGACTCTTCATCG	0.1;0.11;0.34;0.58	56057;56646;66508;73364	1.14E+00;5.97E-01;4.16E-01;1.42E-01	6270;13126;22988;23577	2.11E+00;1.16E+00;9.44E-01;6.09E-01
	Crygc	0.280276	1.16799	5	ATCAAACAGGACTCACATGG;TCCAGCAGCCACTGTCCACG;CCTGACTACCAGCAGTGGAT;TGTCATGATGGAGCTGAGCG;CCGCTGCAATTCTGTCCGCG	-0.31;-0.18;0.26;0.62;1.01	33345;40151;63544;74207;78406	6.83E-01;6.22E-01;5.90E-01;5.09E-01;3.37E-02	1228;5427;16090;39483;46289	1.43E+00;1.28E+00;1.18E+00;1.14E+00;8.17E-01
	Cog6	0.280103	1.1145	4	AGTCGTTGGGCATATCACCG;TTGTGCAGCTTACGCGACAG;CGGACTCGAAGAAATTTACG;GGTCAATCACTATACCTCAG	-0.37;0.07;0.67;0.76	29970;54403;75014;76285	7.12E-01;5.51E-01;4.38E-01;7.46E-02	3349;4620;25231;49663	1.75E+00;1.06E+00;8.30E-01;8.20E-01
	Ddx4	0.280062	1.1358	4	GTGAATCTGACCAAGATCAG;GGTGCTACAATAATACACTC;CAGTTCGACAGATAGTACAA;GAGAACACATCTACAACTGG	-0.28;-0.24;0.74;0.91	34542;36824;76024;77792	8.02E-01;5.02E-01;4.31E-01;4.06E-02	1842;3610;42810;45092	1.95E+00;1.06E+00;9.88E-01;5.42E-01
	Kctd21	0.27994	1.14716	4	GCTATATCCTCAACTTCCTG;AGACGGTCCACTTCACCGTG;AGAGGTAGAACTCTCCAAGG;GGTCAATGAAGCAGTTACCC	-0.52;-0.35;0.71;1.27	22354;30917;75719;79216	7.72E-01;4.70E-01;3.79E-01;9.12E-03	418;3915;48715;57279	1.88E+00;1.68E+00;5.72E-01;4.49E-01
	Olfr173	0.27945	1.16694	4	AAGCTCCCGTCGTCATCTGA;ACAGACCACCCTGAAATGAA;TGCATTCTATGGTTCATGTG;GTTGATATAGGGGTCAACAC	-0.19;0.28;0.47;0.55	39949;64298;70840;72849	8.38E-01;6.05E-01;5.07E-01;1.55E-01	6785;8794;15336;39685	1.64E+00;1.24E+00;1.21E+00;5.83E-01
	Cmc1	0.279234	1.30819	4	CCCAGAGTCCTTGCAACATC;AGGTGCTCCGAACAAGTTGA;TCCTTATGGTATTAAAATGC;ACGTGTCTCAGATGCTGCTC	0.13;0.27;0.35;0.37	57445;63967;66907;67806	1.20E+00;8.24E-01;4.21E-01;2.79E-01	11828;12728;15667;22189	2.22E+00;1.61E+00;9.66E-01;4.36E-01
	Casz1	0.279224	1.18074	4	CAAGAAGTTCTACAAGTACG;TCACGGTCAGGTCTAGACTG;CCCGAACGTCGTACTTAGAG;GGCGCGCTTCTCCAAATACG	-0.06;0.21;0.44;0.52	47471;61295;70023;72136	8.04E-01;7.25E-01;4.84E-01;1.72E-01	7498;9611;18339;32163	1.57E+00;1.42E+00;1.17E+00;5.53E-01
	Ankrd52	0.278427	1.08857	4	CTACACCATGCAGTACACAG;GGAACTGTTAGTTAATAATG;AATGTCCTTTAACTGCCTAG;GGTCTGTACCTCGTTTCGGG	-0.19;0.04;0.5;0.76	39863;52994;71620;76356	6.03E-01;5.33E-01;5.27E-01;7.30E-02	3278;8014;26640;39772	1.31E+00;1.21E+00;1.00E+00;8.38E-01
	Ppp1r42	0.278015	1.15603	4	TCTGGGAGGCAATTACATTG;AAGAACTCTTCGTTCTCTAG;ATTGTTCTGTAGGTACAAGT;AGCTTCATGTTGAAAGTCAG	-0.3;0.35;0.41;0.65	33867;66982;69115;74695	9.70E-01;4.91E-01;4.62E-01;1.11E-01	4939;10519;12652;45766	1.87E+00;1.10E+00;9.62E-01;6.89E-01
	Tbc1d23	0.277621	1.13822	4	GCTGGGGATCAAGGACGACG;GTTCCACCTAGACTCAGACT;GAATATGTTAGCATTGCCAG;GGACGGATATCTACAGCAAG	-0.27;0.2;0.58;0.61	35214;60909;73321;73987	7.12E-01;6.06E-01;5.13E-01;1.28E-01	5647;6313;18725;44420	1.50E+00;1.40E+00;1.01E+00;6.43E-01
	Lamtor3	0.277325	1.28246	4	GTCTGTTGCGAGGGCAAACG;ACGGAATATACAGACCTGGT;TCCTGTACAAAAAGTTGCCA;ATTGTTGTGTCAGATAGAGA	-0.92;-0.1;0.98;1.15	8154;45018;78226;78939	1.17E+00;5.28E-01;4.41E-01;1.52E-02	695;1408;34616;71478	2.74E+00;1.47E+00;7.31E-01;1.88E-01
	Ino80	0.277311	1.12745	4	TGCCCATCAATGCATGAAGG;AGAAAATGAATTGTCTGACA;GTGACGTGGAGATTCTTCAG;GGGTTGCGGAATATCCTCAC	-0.53;0.31;0.49;0.84	21831;65405;71250;77194	8.89E-01;5.21E-01;3.77E-01;5.40E-02	2440;8384;14229;57803	1.73E+00;1.27E+00;9.52E-01;5.57E-01
	Cldn11	0.277283	1.16155	4	AACGTCCACCAATGACTGGG;TGCCGAAAAATGGACGAACT;GGCGGGCAGGCCCAGAACGG;CCTGTGGGCTGACTGCGTCA	-0.13;0.2;0.51;0.53	43263;60756;71869;72335	7.07E-01;6.84E-01;5.43E-01;1.67E-01	7299;7765;18878;36371	1.39E+00;1.36E+00;1.33E+00;5.61E-01
	Sycp1	0.27717	1.06819	4	GGCAGTTGTCACTATCAGGA;CCAACTGAAACTGATTACTG;TAATTACAGATGAATATGAG;GAATATTGAAGAGCTTCACC	-0.25;0.12;0.4;0.84	36288;57197;68705;77174	6.10E-01;5.32E-01;4.53E-01;5.45E-02	2460;10929;22437;43346	1.19E+00;1.08E+00;1.06E+00;9.49E-01
	Izumo3	0.276812	1.11554	4	GAAGACAGTTCCAACAATCG;CTGGGCAACGAAACATGGAA;AGGTACCAGGTTTCCCAACA;GATAACCCATATAAGCTCCA	-0.15;0.19;0.38;0.69	42334;60614;67928;75325	7.03E-01;6.61E-01;4.38E-01;9.66E-02	4309;11706;19020;37300	1.38E+00;1.32E+00;1.03E+00;7.37E-01
	Rps29	0.276615	1.10695	4	ACATGTTCAGCCCGTATTTG;CGTATTTGCGGATCAGACCG;CTCACCAAGAGCGGGAACCC;CAGGGTTCCCGCTCTTGGTG	-0.16;0.08;0.51;0.68	41856;54988;71773;75140	6.49E-01;5.62E-01;5.39E-01;1.01E-01	4494;7861;24645;37778	1.32E+00;1.30E+00;1.09E+00;7.22E-01
	Ranbp2	0.276573	1.09552	4	ATGTTGTTAAACTTAAGTCG;TGCTAATGTAACTCCCACCA;AAATTATTCTCGTCACAAAG;ACATGCAATGCACCTAGAGA	-0.26;-0.15;0.64;0.87	36103;42455;74610;77421	6.83E-01;5.28E-01;4.30E-01;4.89E-02	2213;5024;37179;43531	1.68E+00;1.05E+00;9.91E-01;6.64E-01
	Xkr5	0.276312	1.0731	4	CAGCCCATAGCATGGTATGG;AGGGACCAGCCTGTGGACTG;AGGATCAACGCAGCCCTCGG;GAAATGCTGTGGCCCCATCG	-0.5;0.02;0.6;0.99	23259;51725;73735;78286	6.29E-01;5.07E-01;3.82E-01;2.96E-02	1348;5899;27909;56375	1.55E+00;1.19E+00;9.51E-01;6.00E-01
	Ncoa4	0.276266	1.07961	4	CGTCGCTGATTGTTGCGCCG;TTCAAGAAGTCAGCATCCAG;AATTAAAGATAATTTACGAG;GGTCTTAAGGGATCCAAATG	-0.27;-0.23;0.56;1.04	35418;37771;72957;78560	5.89E-01;5.16E-01;4.28E-01;2.36E-02	1074;6677;41863;44216	1.45E+00;1.29E+00;1.02E+00;5.60E-01
	Dnajc24	0.27626	1.14552	4	AGCAGACACTCAAAAAGGAT;AAGTATGACCTGCAGCGGCA;GGTCTGACATATTTGCAGAT;CTTCTGCATACACTCCTCCA	-0.54;0.26;0.63;0.76	21286;63309;74387;76337	7.98E-01;6.68E-01;3.76E-01;7.34E-02	3297;5247;16325;58348	1.64E+00;1.56E+00;8.36E-01;5.40E-01
	Olfr891	0.276192	1.20343	4	GTGATGATCATGTACAGCAG;TTGGTGCAATTGTCCATACA;GGTGAACTGTTTAATCACTG;AAAAGTGCATAGGTGTCTGA	0.11;0.14;0.2;0.65	56782;58169;60940;74704	1.17E+00;6.33E-01;3.76E-01;1.11E-01	4930;18693;21465;22852	2.17E+00;1.24E+00;7.13E-01;6.89E-01
	Zmym2	0.276096	1.10385	4	TAGGCACAGGGACATACACA;AACGCAGGAGTGAGTAACAG;GGTCTTTGATCAGCAACCAA;CTGCTTTAACAGATACCGAA	-0.68;0.17;0.51;1.1	15688;59537;71899;78777	6.70E-01;5.44E-01;3.89E-01;1.88E-02	857;7735;20096;63946	1.38E+00;1.34E+00;1.32E+00;3.81E-01
	Tmco4	0.276019	1.22901	4	GGTGGAGGCACACGCCCCAG;TAAAGTCTGAGCAAAGATGT;CCATGTTAGCGAGGCCACTG;TGTTTCCAGAACCTGAACAA	0.12;0.18;0.24;0.56	57207;60137;62735;72900	1.19E+00;6.88E-01;3.82E-01;1.53E-01	6734;16899;19497;22427	2.20E+00;1.35E+00;7.75E-01;5.86E-01
	Fdx1	0.276009	1.09131	4	GGGCGCCCGACTCCTGCGCG;GTCCACTTCAAGAACCGAGA;CGGGAACTGCCATCTCTCCG;GCTTTGACAGGTGCGTGTGA	-0.3;0.27;0.27;0.86	33881;63802;63987;77351	8.18E-01;4.91E-01;3.90E-01;5.05E-02	2283;15647;15832;45753	1.60E+00;9.78E-01;9.63E-01;8.25E-01
	Mis12	0.275981	1.1988	4	CCTGCATCACTTCAAACAGG;TGGTGTGAAGCCAAAGAACT;AGATCACCCCTGTCCAGACT;AAGTTTCTTTGCTTCATGAA	-0.79;0.28;0.68;0.93	11823;64303;75267;77888	8.39E-01;7.32E-01;4.36E-01;3.85E-02	1746;4367;15331;67810	1.79E+00;1.64E+00;1.09E+00;2.79E-01
	Ace	0.275562	1.30298	4	ACAAATACGTCAATCTCAGG;GTTGTTGAACGAGTACGCAG;CTATAACTCGAGTGCCGAGG;GCAATGCACACGGGTCACGA	0.14;0.25;0.35;0.36	57835;63218;67067;67520	1.22E+00;7.94E-01;4.24E-01;2.87E-01	12114;12567;16416;21799	2.25E+00;1.56E+00;9.75E-01;4.31E-01
	Tnfrsf13c	0.27529	1.20732	4	CAGACTCACTAGACCCACCA;GACACGCAGTTTCTCACCAG;GCACTCGGTCTGATTGCACT;CTCCGCGCTGAGACCCGACG	0.11;0.16;0.17;0.66	56703;59207;59527;74811	1.17E+00;6.61E-01;3.75E-01;1.09E-01	4823;20107;20428;22931	2.16E+00;1.30E+00;6.97E-01;6.70E-01
	Rps18	0.27519	1.12329	4	AGACATCGACCTCACCAAGA;TTTGACCTCAGGGCGTGGGG;AAAATCTAGGTTCTGGCCAA;GACAGTACAAGATCCCAGAC	-0.24;-0.24;0.71;0.87	37078;37098;75595;77479	7.61E-01;5.46E-01;4.30E-01;4.76E-02	2155;4039;42537;42560	1.86E+00;1.09E+00;1.00E+00;5.47E-01
	Ankzf1	0.275174	1.24334	4	GAGGGACAACAGGGAAACGG;AGAGGGATATCCCAAAGTCG;GGGGCTTATTTGCATCACTG;TTGAAGTACTGCCCAAGCGG	-0.82;0.28;0.79;0.84	10862;64425;76687;77202	8.79E-01;8.44E-01;4.54E-01;5.39E-02	2432;2947;15209;68772	2.12E+00;1.65E+00;9.53E-01;2.55E-01
	A430089I19Rik	0.27516	1.20962	5	TCCTTCGCAGATATGCACGG;ACTTGATTATTACGCACCTG;GAAGCTCATGAAGGCAATCG;TGACAAGAGAATCTCACCCC;TTTCTCATCTGCCCTAAGCA	-0.34;-0.07;0.4;0.6;0.78	31456;46859;68652;73912;76610	9.14E-01;6.17E-01;5.77E-01;5.74E-01;8.40E-02	3024;5722;10982;32775;48178	1.71E+00;1.38E+00;1.09E+00;1.07E+00;7.89E-01
	Bcar3	0.275115	1.06177	4	CCCAACTCTGGAATACGTGA;TCTGTCGTGGGGATTTGGAG;TGTGCAGTACCAATTCGAGA;GAGGGGGGAGTCTTGAGGAA	-0.52;-0.09;0.56;1.14	22420;45855;73043;78919	5.93E-01;4.46E-01;3.79E-01;1.56E-02	715;6591;33778;57214	1.46E+00;1.46E+00;7.55E-01;5.74E-01
	Klhl36	0.275082	1.1544	4	GGATGTTCTCCAGAACGCGG;CCTCCATCTACAGTCTCAAG;TGGTGGGCACCTCCTACGTG;GCTTCTCGAGAGACAACGGA	-0.2;0.27;0.48;0.55	39350;63742;71077;72797	8.15E-01;5.92E-01;5.15E-01;1.56E-01	6836;8557;15892;40284	1.59E+00;1.26E+00;1.18E+00;5.81E-01
	Snrnp40	0.274881	1.10436	4	AGCGTCGACAGACAAAACTG;GCGACGTTGAAGGGACACAG;AAGCCAGGGTGGATCCATTG;GTCTGTACTGGCAGTGACGA	-0.04;0.07;0.18;0.88	48720;54806;60213;77497	8.44E-01;5.59E-01;3.75E-01;4.72E-02	2137;19421;24828;30914	1.64E+00;1.08E+00;1.00E+00;6.90E-01
	Nop56	0.274663	1.16917	4	TAAATTTAATGTGAACCGAG;GAGGAATGTGTGCTTAACCT;CAGCCTGTCAGCCTTAATTG;GGGTACAACTGCCAGACTGG	-0.49;-0.2;0.89;0.89	23759;39380;77613;77644	1.03E+00;4.26E-01;3.85E-01;4.39E-02	1990;2021;40254;55875	2.44E+00;1.03E+00;6.16E-01;5.93E-01
	Herc6	0.274404	1.17582	4	AGTGTGATTTATATTAGCTG;TAATATCAGAGTTCTCTGCG;ACTGAAAACAACCATATCTG;CAGATACTCCTCAAGACACG	0.04;0.16;0.31;0.59	52874;59129;65462;73625	9.97E-01;6.59E-01;4.03E-01;1.36E-01	6009;14172;20505;26760	1.89E+00;1.29E+00;8.91E-01;6.22E-01
	Dlg5	0.274304	1.15656	4	CTGGACAAGATAGATCCAGA;TCAGCCTTAGTTGAATGGAG;AGAAGGACTACGATGCCCTG;GTTCCCCGGAGTATGACCCC	0.06;0.1;0.13;0.81	53950;55874;57608;76940	1.04E+00;5.80E-01;3.78E-01;5.98E-02	2694;22026;23760;25684	1.97E+00;1.13E+00;9.13E-01;6.19E-01
	Rasl11a	0.274281	1.06911	4	ATGAGAGCTACCAATCCATC;ATCTTCATCGTGGGAAACAA;GAGAATCCACCATTTGACTG;GGCGACTACGAACCCAACAC	-0.18;0.12;0.16;1.0	40528;56825;58948;78356	6.18E-01;6.01E-01;3.75E-01;2.81E-02	1278;20686;22809;39106	1.24E+00;1.21E+00;1.17E+00;6.54E-01
	Abcc6	0.27408	1.14989	4	CCTCTGTGGAGGATCCACCA;AACAGGGTGTAGGTACAGAG;TGCACTGCATCGTTCAGGTG;GTGACCGCAACTCCTCGGCG	0.01;0.05;0.42;0.62	51492;53678;69204;74157	9.43E-01;5.38E-01;4.64E-01;1.24E-01	5477;10430;25956;28142	1.81E+00;1.11E+00;1.03E+00;6.53E-01
	Mroh6	0.273876	1.12436	4	CCAAACCTTAGGGCTGTCGG;AGGCAGCTGTATACAACGCA;CCAGTTCGCTACCCCCGGAC;GCGCTGCACTTGGCGCACTG	-0.41;-0.26;0.75;1.02	27514;36010;76216;78434	8.23E-01;4.34E-01;4.12E-01;2.64E-02	1200;3418;43623;52120	1.99E+00;1.24E+00;7.36E-01;5.27E-01
	Rbm25	0.273871	1.3404	4	GCTCAGATCGAAATAAGGAT;CATGCAATAATCTGAGAGCA;GAGTGGGTAAGGGATCAATG;TTTCTGAAGAGCACTACCCC	-1.39;0.32;0.45;1.72	1578;65846;70150;79551	1.13E+00;9.10E-01;4.87E-01;1.79E-03	83;9484;13788;78056	2.38E+00;1.77E+00;1.18E+00;3.47E-02
	Kctd5	0.273754	1.12965	4	CCCCGACCTAGATTCGGACA;TATTAACAAAGACCTCGCAG;TGTCTCAAGTAGTTCAGTAC;CCCCGGTGGCGTGTCCAAGT	-0.06;0.13;0.4;0.63	47495;57505;68619;74344	8.05E-01;6.17E-01;4.51E-01;1.19E-01	5290;11015;22128;32139	1.58E+00;1.21E+00;1.07E+00;6.65E-01
	Hand1	0.273679	1.06419	4	AGGCGATGTAACTGGTAGCC;ACCTACCACCGCAGTAGCAG;TGGTGTCGGCGGGCACATTG;GGAAGTAAGGCCGCTCCTGG	-0.14;-0.11;0.17;1.17	43132;44683;59701;78996	6.81E-01;4.39E-01;3.75E-01;1.40E-02	638;19933;34951;36502	1.50E+00;1.36E+00;7.22E-01;6.75E-01
	Gm973	0.273622	1.05356	4	GTGTTAACCCAATAGGAACG;GCTTCGGAGCAAAGTCACAA;GATAACGGTGCATCTCCCAG;TCGGCCAAAAGATACCTCCG	-0.17;0.02;0.21;1.04	40823;51852;61461;78543	6.25E-01;5.09E-01;3.77E-01;2.39E-02	1091;18172;27782;38811	1.28E+00;1.25E+00;9.56E-01;7.30E-01
	Dnaaf1	0.273568	1.24929	4	TGAGACCAAGGAAACATGTG;CATCCCTAACTACCGCAGGA;TGAGGAAAAGCAACCCATGG;AGAGTCGCAGACACTCCCTG	-0.61;0.51;0.52;0.67	18358;71881;72050;75028	1.33E+00;5.50E-01;3.77E-01;1.03E-01	4606;7584;7753;61276	2.48E+00;1.35E+00;7.13E-01;4.55E-01
	NO_CURRENT_251	0.273501	1.24319	4	TCCGAACAGGCGCGTTTCTC;TCCGTACATCGACCTATTAC;TCCGTAGGACGTATATATTC;TCCGCGGCAACGTTTGGGTC	0.08;0.24;0.32;0.45	55366;62551;65805;70318	1.10E+00;7.69E-01;4.07E-01;2.16E-01	9316;13829;17083;24268	2.06E+00;1.51E+00;9.08E-01;4.92E-01
	Inpp5d	0.273447	1.11651	4	AGAGGCCAGTCCCATCACCA;CATCCGAAGGTGTCCCCATG;TGGGGATCTCAACTACCGCG;CCACTATGCGAATGTTCCAG	-0.03;0.12;0.17;0.84	49371;56836;59398;77148	8.66E-01;6.01E-01;3.75E-01;5.51E-02	2486;20236;22798;30264	1.68E+00;1.17E+00;9.45E-01;6.66E-01
	Heph	0.273283	1.29525	4	CATGTGCAAGGGTGATACTG;TTGGAGCATCTACATGCGAG;GTTTATAAGGAATACAGTGA;AAAAGTCACATACTACTGGA	0.1;0.3;0.32;0.37	56095;65196;66061;67659	1.14E+00;8.79E-01;4.10E-01;2.83E-01	11975;13573;14438;23539	2.12E+00;1.71E+00;9.21E-01;4.33E-01
	Asf1a	0.273193	1.05182	4	TCTGGGATGAGTCCTGCATT;AACGGGTTGTAGAAAGGCGA;GGAGTGGAAAATAATCTATG;CTGATTACTTGCACCTACCG	-0.26;-0.15;0.49;1.02	35689;42071;71270;78449	5.21E-01;5.21E-01;4.29E-01;2.60E-02	1185;8364;37563;43945	1.28E+00;1.24E+00;1.03E+00;6.54E-01
	Nsun7	0.273125	1.10093	4	TTTGATTCGACATCTCGCCA;TTCATTCTAAATGAACACGA;CCGTAACGTACACGGAGTCT;GATGTCCTAATGGTCAACAC	-0.13;0.02;0.51;0.69	43604;52004;71775;75362	6.93E-01;5.39E-01;5.11E-01;9.58E-02	4271;7859;27630;36032	1.38E+00;1.32E+00;9.62E-01;7.40E-01
	Rps12	0.27305	1.06265	4	CGTCAACACTGCTCTACAAG;GGATGCGAGCACACACAGAT;CATTCCAGCATAGCTGCTGG;AAGACCGCCCTCATCCACGA	-0.48;-0.28;0.5;1.35	24248;34991;71496;79325	5.29E-01;4.39E-01;3.87E-01;6.73E-03	309;8138;44649;55385	1.81E+00;1.30E+00;6.31E-01;5.09E-01
	Cox4i2	0.272836	1.14406	4	CCAGCGCTCCTATCCCATGC;GGACAGGACTCAGAACTAGA;GGGCGTAGCAGTCAACGTAG;CTTCTGCACAGAGCTCAGCG	0.01;0.16;0.18;0.75	51183;58961;60115;76150	9.31E-01;6.54E-01;3.75E-01;7.77E-02	3484;19518;20673;28451	1.79E+00;1.29E+00;8.15E-01;6.87E-01
	Car10	0.272677	1.09029	4	AAAAATCCATGAAGGCTGGT;TGACATTTGTGTATAGCTCG;CCCCCAGTGTTGATGCGAAG;ACTTGGTCAATATTTCAGGA	-0.14;-0.04;0.52;0.75	43027;48495;72119;76157	6.78E-01;5.52E-01;4.68E-01;7.75E-02	3477;7515;31139;36607	1.36E+00;1.35E+00;8.37E-01;8.16E-01
	Samd11	0.272589	1.09814	4	CCCGACGAACTGCAGCGACG;AGCTAACATCTCAGCCTGGG;GCAGACCATCGACGGAAGCA;CTGATGGTAGTGGTCCTCGG	-0.19;0.24;0.29;0.75	39785;62479;64797;76248	7.66E-01;6.01E-01;3.96E-01;7.55E-02	3386;14837;17155;39849	1.50E+00;1.20E+00;8.60E-01;8.26E-01
	Trim43a	0.272458	1.20794	5	AGCACATGGACTCATTATGG;GTGTATGCAACCATTTAACC;GTTGATCCCTTTCTTCACAG;GTGTGGCCATAAGTTCTGCG;TTAAATGGTTGCATACACAT	-0.06;-0.01;0.14;0.28;1.01	47708;50414;57976;64226;78390	1.11E+00;7.03E-01;5.45E-01;3.88E-01;3.42E-02	1244;15409;21658;29220;31926	1.98E+00;1.24E+00;1.13E+00;9.72E-01;7.07E-01
	Fcer1a	0.272451	1.17989	4	GTGTACTTGAATGTAACGCA;AGTGCCACCGTTCAAGACAG;GAAGAACTGGAATGTCCGCA;GTAAATATTCTAATCCATGG	0.04;0.06;0.46;0.53	53066;54242;70394;72280	1.00E+00;5.48E-01;4.94E-01;1.68E-01	7354;9240;25392;26567	1.91E+00;1.20E+00;1.05E+00;5.59E-01
	Sync	0.272449	1.13928	4	CACTGTTTATCGACGAATCG;GGAGTCAGAATCCCCGAAGG;AGAGGACATTCTCTATCTGG;TCAACCGATTCCCAACACCG	-0.66;0.31;0.51;0.92	16423;65594;71907;77844	8.98E-01;5.44E-01;3.84E-01;3.95E-02	1790;7727;14040;63211	1.74E+00;1.34E+00;1.08E+00;4.01E-01
	Ube2o	0.27232	1.10107	4	CACCAAGAGCAAGTTCCGTG;CATCCGCATTGGTAACACGG;GGTACGCCTCATCCACGGCG;ATGTGTCGAACCACATCCCG	-0.23;0.05;0.6;0.67	37664;53327;73803;75086	6.32E-01;5.58E-01;5.32E-01;1.02E-01	4548;5831;26307;41970	1.56E+00;1.11E+00;1.02E+00;7.18E-01
	Wdr1	0.272024	1.04441	4	GTAGCCAAGTATGCACCCAG;ATGGCTCCCAGAATAGATGT;GGCCCTACCGACTAGCAACA;GTGTGCGATTCTCTCCTGAT	-0.53;0.1;0.35;1.17	21583;56329;67099;78993	5.90E-01;4.24E-01;3.77E-01;1.40E-02	641;12535;23305;58051	1.50E+00;1.15E+00;9.77E-01;5.49E-01
	Spata45	0.271656	1.1294	4	GGCAACGAAGAGAAGACACA;AAGATGACATCCATGAACAA;TTTGATATGCATGCAAGCTA;GCGCGAGTCCTACTGCCTGG	-0.43;0.36;0.39;0.77	26633;67344;68387;76463	9.91E-01;4.46E-01;4.04E-01;7.06E-02	3171;11248;12290;53001	1.91E+00;1.05E+00;8.51E-01;7.07E-01
	Ubxn4	0.271619	1.09618	4	TCCCTTTGGAAGTAATAGCG;GCCTTGCTGACCAAACAGGC;TAGATACTGAACTTTCTGAC;CTCTGGTTTGAACATCCATG	-0.61;0.11;0.62;0.97	18121;56468;74259;78165	6.60E-01;5.93E-01;3.77E-01;3.23E-02	1469;5375;23167;61513	1.62E+00;1.16E+00;1.16E+00;4.49E-01
	Slitrk4	0.271558	1.05742	4	AAGCAAGAACTATGCCCCAT;AGATGATAGAAATTAGACCA;CTTTAATGCTACCAAGTCGC;TTAATCAAGTATATTGAACG	-0.5;0.19;0.32;1.08	22973;60584;66004;78691	7.02E-01;4.09E-01;3.81E-01;2.07E-02	943;13630;19050;56661	1.38E+00;1.34E+00;9.18E-01;5.91E-01
	Skap2	0.271513	1.07728	4	ATCATCCTCAGGAATAACGT;GATGTCACATACCATCAGAG;AATATGACGATCCCTTTGCT;GGTTTGAATGGCAGAAACGG	-0.09;0.02;0.34;0.82	45555;51807;66781;76993	7.46E-01;5.09E-01;4.19E-01;5.86E-02	2641;12853;27827;34079	1.47E+00;9.59E-01;9.55E-01;9.21E-01
	Dhrs3	0.27145	1.02088	4	TTGGTAACCAAAGCAGCCGT;ACAGTGCAAGCACGGAATTG;CCTTACCCAGAATTGGCCCA;GCTCTGCGAACTCCCGAGCG	-0.55;-0.12;0.26;1.49	20851;44157;63596;79451	4.36E-01;3.87E-01;3.75E-01;3.97E-03	183;16038;35477;58783	2.04E+00;8.09E-01;7.07E-01;5.27E-01
	Olfr510	0.271306	1.04502	4	TGTGTATCCAATTGCTTGTA;AGAGGATGACTCTAAGAACT;AAAATGAATCAAGAATTATG;TATGGTTGTCAACTTCCTGG	-0.21;-0.17;0.18;1.29	38831;41049;59897;79238	5.81E-01;4.27E-01;3.75E-01;8.64E-03	396;19737;38585;40803	1.71E+00;1.16E+00;6.81E-01;6.30E-01
	Pdzd2	0.271175	1.14788	4	CCACCCACGTGGAATCGCCG;TGGGTGACAACGATAGCGTG;GCATCGCCATACATGGACGA;CTGTGAATGTATATACCTGG	-0.86;0.23;0.49;1.21	9728;62439;71373;79099	7.65E-01;5.25E-01;4.81E-01;1.17E-02	535;8261;17196;69906	1.58E+00;1.50E+00;1.29E+00;2.26E-01
	Rarb	0.271159	1.11087	4	TGACGCAGTTCTTATCTCGA;ACCGGCATACTGCTCAATGT;AAGCAGGGCTTGTACACCCG;CCAAGTCCAATCGGACCCGG	-0.66;0.0;0.7;1.05	16441;50885;75453;78580	7.48E-01;4.96E-01;3.84E-01;2.31E-02	1054;4181;28750;63193	1.83E+00;1.29E+00;9.20E-01;4.02E-01
	Rcc2	0.270821	1.05746	4	AGCATGCTGATGGACTGTAA;GACAGGCACCCATACCTATG;CCTTCGGAGAGAATAAAATG;GATCTTACCTGTCCCCAACG	-0.31;-0.26;0.49;1.16	33269;35999;71203;78980	5.19E-01;4.82E-01;4.34E-01;1.43E-02	654;8431;43635;46365	1.49E+00;1.27E+00;9.40E-01;5.27E-01
	Birc5	0.270598	1.03139	4	GCTGGGACTCACTCGCTCTG;GAAGGGCCAGTTCTTGAAGG;AGGTACAGCTGCCAGATCTG;GAGCATAGAAAGCACTCCCC	-0.42;-0.28;0.27;1.51	27033;34988;64039;79463	4.39E-01;4.07E-01;3.90E-01;3.71E-03	171;15595;44655;52600	2.07E+00;8.27E-01;7.20E-01;5.09E-01
	Myb	0.270474	1.22317	4	AGGTGCATGATCGTCCACCA;GTCACTTGGGGAAAACTAGG;ACAGGTGCACTATCCCCATG;TTCCACCATGCGTCGCAAGG	0.12;0.2;0.23;0.54	56883;60818;62047;72572	1.18E+00;7.09E-01;3.79E-01;1.61E-01	7062;17587;18816;22751	2.18E+00;1.39E+00;7.50E-01;5.71E-01
	Rsbn1	0.270137	1.08114	4	CGAAGAACACCAGTCCAATG;AGCGGTTCGCGTAGTACGGG;GCTCACCGTCAGAGGCGAGA;CTCTCGCTCCCCCTCATCGG	-0.27;0.09;0.55;0.72	35199;55448;72726;75794	5.78E-01;5.71E-01;5.13E-01;8.58E-02	3840;6908;24185;44435	1.42E+00;1.11E+00;1.01E+00;7.79E-01
	Hmbox1	0.270107	1.1631	4	AGGGTCCTCTATTGGAATGG;ATTGGTAGTGCAAGGCAGTG;TGGAAGGAGGTCCAGCTACG;GGAACCTTCCGGCTTCGACG	-0.18;0.31;0.43;0.52	40516;65369;69655;72092	8.87E-01;6.18E-01;4.74E-01;1.73E-01	7543;9979;14265;39118	1.72E+00;1.23E+00;1.14E+00;5.51E-01
	Daam1	0.2699	1.27022	4	ATTGCAACATCCTTCTGTCG;GGTCAGCTCAAACATCTGAG;GGATGAAGTAAGTCTCAAGA;GGTGTGTATCCGAGACTCAG	-0.85;-0.34;0.94;1.33	9866;31423;77983;79306	1.11E+00;4.77E-01;4.65E-01;7.15E-03	328;1651;48210;69768	2.61E+00;1.79E+00;4.56E-01;2.30E-01
	BC052040	0.269849	1.07696	4	CTAGGTACCTGAATGGCGTG;TAGTGGGCGGTACAGACACT;ATAATCCGAGCCATTAATGA;TCATCAATACCTGATAGACC	-0.08;0.02;0.15;0.99	46488;51814;58517;78274	7.74E-01;5.09E-01;3.76E-01;2.99E-02	1360;21117;27820;33146	1.52E+00;1.19E+00;9.55E-01;6.42E-01
	Fgfr2	0.269644	1.07609	4	GGAGACCCCTGCTAGCATCG;GGTGCCACACCTAGAGACTC;GGCCGCCGGTGTTAACACCA;CAACTCTAGCGATTCCCCGG	-0.3;0.22;0.38;0.78	33694;61737;67974;76596	7.40E-01;4.88E-01;4.39E-01;6.75E-02	3038;11660;17897;45940	1.45E+00;1.03E+00;9.56E-01;8.67E-01
	Tbc1d10c	0.269566	1.07945	4	ATGTGTCAGAAGAACAACCC;CATGTCCCGACGATACAAGA;GCATCAGTGTCAGCCCCACG;GCAGGTGCTTGTACACTCGT	-0.41;0.18;0.52;0.78	27983;60125;71997;76598	6.88E-01;5.47E-01;4.16E-01;6.75E-02	3036;7637;19509;51651	1.35E+00;1.35E+00;8.67E-01;7.52E-01
	Nelfb	0.269352	1.20099	4	GAATGTGAAGCTGTACGACA;CCAGCAGCCTAAGTAGTAGG;CGCCACGCTACCTTATGGCA;TGGATCTACACGGGACACCG	0.07;0.22;0.24;0.55	54439;61625;62741;72837	1.06E+00;7.36E-01;3.82E-01;1.55E-01	6797;16893;18009;25195	2.00E+00;1.45E+00;7.76E-01;5.83E-01
	Add1	0.269286	1.24422	4	CCGTGGAAGTACTAACCTAG;TTCTATCGCATATGACAAAG;GGATCTCACATGCAACCACA;ACTCTTGCCTATCTCCCCGG	0.15;0.19;0.21;0.52	58699;60547;61289;72144	1.27E+00;7.01E-01;3.77E-01;1.72E-01	7490;18345;19084;20935	2.32E+00;1.38E+00;7.24E-01;5.53E-01
	Snhg11	0.269268	1.1181	4	CACCAGTGAGTGCGGAGAGT;TTATTGCAGAATTGACAGCT;GGATGACGACGCAAAACCTG;GCAAGGCCCTCTTGACACCA	-0.19;0.19;0.49;0.59	39668;60689;71174;73600	7.05E-01;5.99E-01;5.18E-01;1.37E-01	6034;8460;18945;39965	1.39E+00;1.27E+00;1.20E+00;6.21E-01
	Zscan18	0.269096	1.11949	4	GGCTCAACCATACCAACAGG;AGCTGCTGGAAACTAGTCAG;CCTGATGAATGAGTTCACGT;TTAGGACTTAGCAACCCACA	-0.03;0.15;0.18;0.77	49370;58414;60174;76477	8.66E-01;6.40E-01;3.75E-01;7.03E-02	3157;19460;21220;30263	1.68E+00;1.26E+00;8.52E-01;6.89E-01
	Fcrla	0.269052	1.09858	4	ACCTTCTAGTGAGCCCCAAG;TTACTTACCCAGTAACATCT;AGGCACTGGGATCTCACCAT;TCAGGTTATCTTCTACCGAG	-0.26;0.27;0.34;0.72	35910;63947;66789;75840	8.24E-01;5.25E-01;4.19E-01;8.48E-02	3794;12845;15687;43724	1.61E+00;1.04E+00;9.59E-01;7.84E-01
	Olfr938	0.269048	1.12727	4	CTGTAACCAAATATACAGCT;TAGAACTGAGCTATGCATTG;CTGTTCGTTGATGGTAGCTG;CACCCATGTATTATTTACTC	-0.42;0.28;0.55;0.67	27008;64494;72756;74976	8.47E-01;5.79E-01;4.07E-01;1.05E-01	4658;6878;15140;52624	1.65E+00;1.43E+00;7.20E-01;7.09E-01
	Zfp608	0.268895	1.18036	4	TGGGGACAATCAATTAACAC;TCGAACCTATAATAGGACCT;GTCTAGGAGGGTCCCCACGT;GGGTGCTTGCCCATTCACCA	0.07;0.16;0.26;0.59	54522;58983;63677;73531	1.07E+00;6.55E-01;3.87E-01;1.38E-01	6103;15957;20651;25112	2.00E+00;1.29E+00;8.12E-01;6.17E-01
	Olfr1317	0.268879	1.09993	5	TTCCTGGTCACTGCCAACAG;TCTCTGTTCCCCCAACAGTG;TTTATGTGGCAAGTATGCTG;GAATTCTCCATGAATTGGTG;GCACATTCTGAGACTCATGA	-0.38;-0.11;0.1;0.46;1.27	29402;44717;56149;70405;79214	5.75E-01;5.34E-01;5.16E-01;4.51E-01;1.15E-02	420;9229;23485;34909;50232	1.59E+00;1.03E+00;1.00E+00;9.84E-01;8.94E-01
	Spidr	0.268266	1.05668	4	GAAAATTCTAGAACTGCATG;GCTCAGTCAGAGATATCACT;ATTACAGGTTATTGACTGGG;GCGCGAAGACCTATACAGTC	-0.39;0.23;0.27;0.97	28622;62103;63863;78161	7.52E-01;4.23E-01;3.89E-01;3.24E-02	1473;15771;17531;51011	1.48E+00;1.16E+00;8.20E-01;7.74E-01
	NO_CURRENT_220	0.268154	1.05976	4	GTGTGGTATATCCCCGTTTT;GTGTGCCTCGACAGCGTAAG;GTGTCTTTCGGTCTTACGAG;GTGTTGTCCGAGAACCCGAC	-0.15;-0.0;0.1;1.12	42524;50750;56123;78840	6.65E-01;4.94E-01;3.84E-01;1.74E-02	794;23511;28884;37110	1.41E+00;1.33E+00;9.15E-01;5.85E-01
	Lctl	0.26796	1.06411	4	AGTGGTGCAAGGTCACAACG;CCACTCGATACATCACTCAA;GGCATTCTTATAATAACACG;TTTGCCAACCCTATTTACGC	-0.13;0.0;0.4;0.81	43223;50895;68741;76839	6.83E-01;4.96E-01;4.54E-01;6.20E-02	2795;10893;28739;36411	1.36E+00;1.08E+00;9.20E-01;8.99E-01
	Sv2a	0.267897	1.07724	4	AGCCCCGATGGCAAACACAG;TGAGAAAGACATGTGCCTGT;GCGGTAATAGCCGTCCGCAG;TGTGGACACTCACCCGACCC	-0.36;0.26;0.34;0.83	30350;63669;66635;77087	8.12E-01;4.42E-01;4.17E-01;5.64E-02	2547;12997;15965;49284	1.59E+00;9.51E-01;9.35E-01;8.34E-01
	Lhx8	0.267896	1.13973	4	AGTCAAAGTGCACTCTACAG;GGTAATGGGATTAGTGTGGA;GGCTCGCTTACCTTCTCGCG;GGGACCCGCTGTTCCCGCTG	0.02;0.12;0.29;0.64	52086;56877;64659;74634	9.65E-01;6.02E-01;3.95E-01;1.13E-01	5000;14975;22757;27548	1.84E+00;1.18E+00;8.54E-01;6.85E-01
	Fcer1g	0.267589	1.10573	4	CCTACTCTACTGTCGACTCA;TCCAGGATATAGCAGAGCTG;ACTCCAGATCCAGGTCCGAA;TTTGGTGGAACAAGCAGGTA	-0.11;0.03;0.52;0.64	44493;52301;72087;74464	7.17E-01;5.51E-01;5.16E-01;1.17E-01	5170;7547;27333;35141	1.42E+00;1.36E+00;9.74E-01;6.73E-01
	Adgrf3	0.267468	1.16203	4	GGTTAGCTGGAATGTCACCA;AGTTCCACTATGGACCAGTG;GTGTTGCAGACGTCCAGTGA;AGTAGCCAGTAACAGGACCG	0.07;0.14;0.17;0.7	54453;57860;59408;75534	1.06E+00;6.26E-01;3.75E-01;9.18E-02	4100;20226;21774;25181	2.00E+00;1.23E+00;7.55E-01;6.67E-01
	Dot1l	0.267307	1.07681	4	TGGCTGGCCGGAAACGTGGG;TAGGTTAGCCTTGTACTGCG;GGGAACGGATCGCCAACACG;GCTGTGTGACAAATACAACC	-0.71;0.13;0.45;1.2	14486;57562;70216;79077	6.18E-01;4.89E-01;4.00E-01;1.22E-02	557;9418;22072;65148	1.56E+00;1.21E+00;1.19E+00;3.49E-01
	Ms4a10	0.267274	1.14504	4	AGTGACCTTCTACAGAAGTT;GCAGAACAAGCTGATAACGT;TTACTGGAGAAGTCTCACGA;GGAGATCAAGTAGCCACCAA	-0.63;0.12;0.77;0.81	17558;57175;76445;76875	8.49E-01;6.09E-01;3.79E-01;6.12E-02	2759;3189;22460;62076	2.05E+00;1.19E+00;9.04E-01;4.33E-01
	Mnt	0.267113	1.21854	4	GGACAACGTTGACGAGGAGA;GAAGCGCAACATCCCCAACG;CTGTGGTCTTCGCATCAGGC;GAATGACAGTCAGTGGAGCA	0.11;0.2;0.22;0.53	56661;61074;61891;72284	1.17E+00;7.17E-01;3.78E-01;1.68E-01	7350;17743;18560;22973	2.16E+00;1.41E+00;7.45E-01;5.59E-01
	Rpl5	0.267	1.08252	4	TGCATATGCCCGTATAGAAG;ATACTATCTATTACCTATGA;GTGAGATTTCGAAGGCGGCG;ATATTATATACATACCCTGC	-0.13;0.17;0.18;0.85	43502;59346;60180;77246	6.90E-01;6.65E-01;3.75E-01;5.29E-02	2388;19453;20288;36132	1.37E+00;1.31E+00;9.61E-01;6.89E-01
	Morn1	0.266843	1.12391	4	GTCATGAAGTACAAAGCCGG;AGCTGTACACTCAACGTGAA;ACAACAAGAGACATGGCCGT;GCACTTTCCACAGTAGACCC	-0.48;-0.44;0.62;1.37	24314;26098;74141;79354	6.52E-01;5.36E-01;3.88E-01;6.10E-03	280;5493;53536;55320	1.86E+00;1.61E+00;6.33E-01;4.00E-01
	C2cd4a	0.266715	1.09635	4	GGCAGCGTCTGGGTCGCCCG;GAGCACGTTTGCGCACGCAG;GAGCCCGCACACGCGCCGAA;GCAGACACGGAGGCCGACGA	-0.17;0.1;0.51;0.63	40968;56145;71790;74339	6.28E-01;5.86E-01;5.40E-01;1.20E-01	5295;7844;23489;38666	1.33E+00;1.26E+00;1.14E+00;6.65E-01
	Mucl2	0.266503	1.03465	4	GATTCTGCTGGTGAAAATAC;GTTAAATGATAACAGTACCG;TTTCAGTACTGTTTGTCTCC;TTCTTCTTCGACTGAATCAG	-0.33;0.1;0.15;1.15	32116;55953;58380;78944	5.82E-01;4.65E-01;3.76E-01;1.51E-02	690;21254;23681;47518	1.47E+00;1.13E+00;8.97E-01;6.39E-01
	Wtap	0.266467	1.09455	4	TACTCAGCAAACGATGTGAC;AAGCTGTGCAATACGGCCCT;GAGCTTAAAAGCAGTCAGGA;CAGACTTCAAAGTTATGGCA	-0.5;-0.27;0.68;1.15	23389;35240;75252;78943	7.31E-01;4.38E-01;3.83E-01;1.51E-02	691;4382;44394;56245	1.79E+00;1.47E+00;6.04E-01;5.13E-01
	Ccdc187	0.266309	1.07505	4	CTTCGTACAGCTGAGCATAG;TGCACAAAAGAATTACTCCA;GGGTTTACACAACCAGGTGT;CTGACGCATGAAGTCACGTA	-0.09;0.07;0.16;0.92	45960;54709;58854;77859	7.58E-01;5.57E-01;3.75E-01;3.91E-02	1775;20780;24925;33674	1.50E+00;1.08E+00;1.07E+00;6.51E-01
	Nfasc	0.265909	1.08185	4	TGCCACTCCGAAGATCGTCA;GGAAAACCTAGACCCCGTCG;CGAGCGGTACCGAACCAGTG;TGATCCTTTATAACCGGACA	-0.25;0.23;0.35;0.73	36351;62304;67219;75941	7.60E-01;5.33E-01;4.26E-01;8.25E-02	3693;12415;17331;43283	1.49E+00;1.06E+00;9.83E-01;7.94E-01
	Retreg3	0.265849	1.17887	4	CTGACGCCTTGGACAACGAG;CAAAAAGCAAAACCCAGGCA;AACTGGCTTCAGTCGCACAT;GGCACATTTAACCTGTCAAG	0.05;0.1;0.41;0.5	53680;56313;68910;71538	1.03E+00;5.90E-01;4.57E-01;1.86E-01	8096;10724;23322;25954	1.95E+00;1.15E+00;1.09E+00;5.30E-01
	Olfr1256	0.265338	1.11126	4	GTAACTACCAGTAACAGCCT;TCCCACCATAGTCAAAACAT;CTGTTGATATTATCTTGGAT;GGCCTCTTAGTGATGGCCAA	-0.44;0.27;0.54;0.69	26124;63876;72598;75361	8.21E-01;5.72E-01;4.00E-01;9.58E-02	4273;7036;15758;53511	1.60E+00;1.41E+00;7.40E-01;6.91E-01
	Rab24	0.26519	1.20848	4	GGTCACTCTTAGTGCCACAC;ATGAGCAGAATCTATTACCG;GTCTCCAACGCACATCACCT;GGTGCACTCACGTTCTGATA	-0.72;0.38;0.65;0.75	14269;67916;74791;76182	1.02E+00;6.96E-01;4.02E-01;7.70E-02	3452;4843;11718;65365	1.96E+00;1.71E+00;8.19E-01;3.43E-01
	Zbtb9	0.264761	1.06064	4	GGAAAACGTTGAGTGTAAGG;ACATTCGGTAAAGTCAGTCG;GCAGCGAAGAGCTATGATGA;GAGAACTAGAAACGTCTGGT	-0.21;0.07;0.46;0.74	38951;54610;70395;76062	5.84E-01;5.55E-01;4.94E-01;7.97E-02	3572;9239;25024;40683	1.20E+00;1.17E+00;1.07E+00;8.06E-01
	Mtmr2	0.264522	1.05266	4	GTAATGATTCTCTCATAACA;GTGGCATCCTTTAGGTCACG;TGCTCGGCCAAGTGTCAATG;GCCTTCTGTACTCTAGAAGG	-0.1;-0.07;0.2;1.03	45303;46994;60795;78468	7.39E-01;4.55E-01;3.76E-01;2.56E-02	1166;18839;32640;34331	1.46E+00;1.25E+00;7.89E-01;7.08E-01
	Got2	0.264318	1.20267	4	AGCTCACCTTCCGGACACTG;TGGAGGTCCCATTTCAACAT;CATCCTCCTCACCTTCACCA;TTTCTGCCCAAACCATCCTG	0.01;0.22;0.39;0.43	51637;61797;68533;69621	9.48E-01;7.42E-01;4.49E-01;2.33E-01	10013;11101;17837;27997	1.82E+00;1.46E+00;1.06E+00;4.74E-01
	Fhl1	0.264041	1.06962	4	TGCATTATAAGAATCGCTAC;CCCTGCAGGAGACCAGAACG;ACTGCAGGGACCCCTTGCAG;CAACAAGTGCGCTACTCGGG	-0.41;0.27;0.34;0.85	27988;63953;66611;77279	8.24E-01;4.17E-01;4.16E-01;5.21E-02	2355;13023;15681;51646	1.61E+00;9.66E-01;9.50E-01;7.52E-01
	Nsrp1	0.263647	1.24358	4	GCTGTCATACTCATACACAG;CCACTCAAGATCATCTAGTG;ACCAAGCAGAAAGATCTCAG;TCTCTGAATTGGTTTCATCA	-1.22;0.23;0.47;1.57	3041;62295;70854;79501	8.67E-01;7.59E-01;5.08E-01;2.88E-03	133;8780;17339;76593	2.18E+00;1.49E+00;1.24E+00;6.76E-02
	Ube2r2	0.263541	1.06468	4	CCTAACACCCTCTACGAAGG;TGAGTCCGACCTCTACAACT;CTCTGCGGGTCATCTACAGG;TCAGATTCTTGACCAAAATG	-0.17;-0.15;0.54;0.83	40913;42416;72534;77123	6.27E-01;5.69E-01;4.30E-01;5.56E-02	2511;7100;37218;38721	1.40E+00;1.25E+00;9.41E-01;6.63E-01
	Phox2a	0.263478	1.19108	4	GAGCACTCGTGAACGTTGTG;GTTCCGCAAACAGGAGCGCG;CCTCGCGAGTGTAAATGTCG;GGGCGAGGCGCGTTGCTCGT	-0.78;0.36;0.6;0.87	12049;67508;73834;77441	1.00E+00;6.34E-01;4.32E-01;4.85E-02	2192;5800;12126;67585	1.92E+00;1.56E+00;9.95E-01;2.85E-01
	Grpel1	0.263336	1.0538	4	ACGACAGTGCCAAAGCCGGG;GTAGCTGTGCACAACAAGCG;TGGCAGATACTGAGAATCTA;TGTCTGCTTACCATATAACT	-0.45;0.18;0.46;0.86	25839;60197;70407;77337	6.90E-01;4.94E-01;3.98E-01;5.08E-02	2297;9227;19437;53795	1.36E+00;1.20E+00;9.76E-01;6.81E-01
	Cul2	0.263098	1.09588	4	GCAGAAACATATCCATGACG;GCTGGTAAACTCATAACCAC;ATATAAGCAGTCCATATAGT;AGATATCTATGCTTTATGTG	-0.12;-0.07;0.57;0.67	43798;47006;73306;75032	6.98E-01;6.06E-01;4.55E-01;1.03E-01	4602;6329;32628;35836	1.49E+00;1.39E+00;7.89E-01;7.14E-01
	Bckdk	0.263042	1.21926	4	GCGACCGGAATAGAGCATCA;TGTCTTCATGTAGCGCCAAG;ACAGCACGAGCTATACATCC;AGTCCGCATCAACGGACATG	0.13;0.18;0.22;0.52	57750;59954;61782;72049	1.22E+00;6.83E-01;3.78E-01;1.74E-01	7585;17852;19680;21884	2.24E+00;1.34E+00;7.41E-01;5.49E-01
	Adcy5	0.262881	1.12682	4	GACGAAGACCCTCCACTAAG;AGTGCACACACCCACAATGT;TTTACGGATTAAGATCCTCG;CCGCTCTAAGAAGTTCCCGT	-0.45;0.32;0.53;0.65	25898;65729;72305;74726	9.04E-01;5.60E-01;3.98E-01;1.10E-01	4908;7329;13905;53736	1.76E+00;1.38E+00;6.91E-01;6.83E-01
	Gnb4	0.262827	1.04613	4	ATACAACCTAAAGACCCGAG;GTCACCCGAGTGTCCCGTGA;CTTCGGAATCAGATCCAGGT;ACGTCTAATATGGACTCCGT	-0.13;0.01;0.27;0.89	43756;51536;63994;77627	6.97E-01;5.05E-01;3.90E-01;4.43E-02	2007;15640;28098;35878	1.39E+00;1.03E+00;9.44E-01;8.25E-01
	Fkbp7	0.262285	1.1543	4	ACGGCTCCAAATTCTACTGC;TTTCCATATGCAAACGAAGG;TTGCTAAATGCCCATTACGA;GTGTCGGACATGTCATAAAG	-0.19;0.3;0.45;0.49	39911;65226;70094;71265	8.80E-01;6.04E-01;4.86E-01;1.93E-01	8369;9540;14408;39723	1.71E+00;1.21E+00;1.18E+00;5.21E-01
	Pak1	0.262229	1.05162	4	GACACTGGAACCCTAAACCA;GGGCGTGGAGCAATCACTGG;GGAGTGGTGTTATTCTCAGT;GGTTCGAGAAGATTGGACAA	-0.35;0.18;0.42;0.8	30902;59856;69407;76792	6.80E-01;4.68E-01;4.49E-01;6.31E-02	2842;10227;19779;48732	1.34E+00;1.12E+00;8.93E-01;8.53E-01
	Defb34	0.262017	1.16504	4	AGAAATGCAGCAGGATTAAT;AAAAAAAAAAAATGCATTCT;AAGAACTTGTTGCTCTCTGC;TCTTTGCTGTTCTCTTCTTT	-0.69;0.31;0.65;0.78	15163;65397;74745;76587	8.88E-01;6.92E-01;3.93E-01;6.78E-02	3047;4889;14237;64471	1.73E+00;1.70E+00;8.66E-01;3.67E-01
	Ccdc92b	0.261845	1.06585	4	CCAGCTGCGACTCTAGCGCG;CAGGTGCAGGTCTCGAAGCA;GCGGACCCGAGAGAGCCGCC;GCGCCGCAGCCATCGCGCCA	-0.44;0.01;0.65;0.83	26079;51485;74747;77058	6.93E-01;5.04E-01;4.00E-01;5.71E-02	2576;4887;28149;53555	1.70E+00;9.42E-01;9.31E-01;6.89E-01
	Cxcl16	0.261797	1.07233	4	CCAGTGGGTCCGTGAACTAG;CCATTAGGCGATGGCAACCA;CAAAGAGCACACCCAACCCT;TCTGGCACCCAGATACCGCA	-0.22;0.23;0.28;0.76	38096;62213;64305;76326	7.56E-01;5.66E-01;3.92E-01;7.37E-02	3308;15329;17421;41538	1.49E+00;1.13E+00;8.39E-01;8.35E-01
	Cox8c	0.261682	1.05159	4	AAAAAAAATCCTGTCGCCCA;GCTTCGAGAACAGGACTGCA;GGCTTTCTGAGTGGCTGAGG;TTCTCGAAGCCTGGCCACCC	-0.18;0.06;0.09;1.08	40584;54353;55391;78690	6.19E-01;5.50E-01;3.87E-01;2.07E-02	944;24243;25281;39051	1.34E+00;1.24E+00;1.06E+00;5.70E-01
	Fsbp	0.261515	1.13428	4	GAGACAGGAGCCACATACAG;GAGTTGAGGATTTGAAACCA;GAGTTAATGCATGTTGTGGA;GGAGCTATTGCAGCAAAAGG	-0.61;0.29;0.61;0.76	18133;64601;73992;76391	8.52E-01;6.43E-01;3.77E-01;7.22E-02	3243;5642;15033;61501	1.66E+00;1.59E+00;8.42E-01;4.49E-01
	Ptger4	0.261412	1.0281	4	CCAGTTATATCAGCCAAACG;ACAGCCACTACGTGGACAAG;GGCCACCGAAGCTACCGCGG;CGACTTGCACAATACTACGA	-0.2;-0.2;0.32;1.13	39109;39223;65887;78886	5.87E-01;4.26E-01;4.08E-01;1.64E-02	748;13747;40412;40525	1.44E+00;1.17E+00;9.12E-01;5.89E-01
	AU019823	0.26127	1.15702	4	ACTTACAGATGGGGTCACAG;TTTAAACGTCTAGATTCAGG;AGATGGAGGATGCTTACCAG;TGGAAAAAAACCATCTCCCC	-0.03;0.21;0.35;0.51	49357;61393;67179;71691	8.66E-01;7.28E-01;4.25E-01;1.83E-01	7943;12455;18241;30277	1.68E+00;1.43E+00;9.81E-01;5.36E-01
	Defb33	0.261192	1.11358	4	TTTCGTCCGTGTGAGAAAAT;CGTCCGTGTGAGAAAATGGG;TGTCTTGCTCAGACTACATC;TCTGAGCAAGACACACAAGG	-0.78;0.27;0.39;1.17	11923;63887;68474;79000	8.21E-01;4.48E-01;4.34E-01;1.39E-02	634;11160;15747;67711	1.61E+00;1.51E+00;1.06E+00;2.82E-01
	Vwa5a	0.261158	1.19095	4	CTAAGGTTGCAGTTACCCTG;CAATTCTCAGCTACGCATCG;GGAGAGTGTGAAGTACACTC;AAATATCGCCCGGGTATCAG	0.08;0.2;0.22;0.55	55194;60903;61610;72693	1.10E+00;7.12E-01;3.78E-01;1.58E-01	6941;18024;18730;24440	2.05E+00;1.40E+00;7.35E-01;5.76E-01
	Fyn	0.261144	1.04416	4	GTGGATACTATATCACAACG;AGCCCGCTCCTTGACAACCG;TTATGACTATGAAGCACGGA;GGGTGGGGTCTGTGCCATAG	-0.15;-0.02;0.11;1.1	42202;49797;56552;78796	6.57E-01;4.82E-01;3.82E-01;1.84E-02	838;23082;29837;37432	1.39E+00;1.31E+00;8.81E-01;5.95E-01
	Acaca	0.261082	1.14008	4	AAGCCCTTCGAACATACACC;AATGCATGCGATCTATCCGT;GCCATTCATTATCACTACGT;TTGATTCATAGGTACCGAAG	-0.09;0.19;0.44;0.5	45926;60363;70020;71525	7.57E-01;6.95E-01;4.84E-01;1.87E-01	8109;9614;19271;33708	1.49E+00;1.37E+00;1.17E+00;5.30E-01
	Bola1	0.261059	1.22262	4	GAGCTGCGCAACGAGAGCGG;CTCCAATTTGGCGCGAATAG;ACGCGCTCGTGTGTATCGCG;ACGGCACCGGTTGGTCCACG	0.12;0.21;0.22;0.49	57204;61311;61686;71406	1.19E+00;7.25E-01;3.78E-01;1.89E-01	8228;17948;18325;22430	2.20E+00;1.43E+00;7.38E-01;5.26E-01
	Gjd4	0.260967	1.25776	4	CTCGCATGTACCCTGCTCAG;GGCACTTACACCCTACACCG;AAAGAGGTCGTAGCAAACGT;TGCCTCTTACAAAACCCCCA	0.13;0.21;0.34;0.37	57404;61344;66674;67668	1.20E+00;7.26E-01;4.18E-01;2.83E-01	11966;12959;18290;22230	2.22E+00;1.43E+00;9.53E-01;4.33E-01
	Coq4	0.260942	0.929544	3	CCAGGAAGCGAAGATACTCA;TCATCGTCCACAAAGCGTGT;CTCTACAACCCCTATCGCCA	-0.44;0.17;1.05	25990;59758;78600	3.75E-01;3.52E-01;1.70E-02	1034;19876;53644	1.42E+00;8.53E-01;5.15E-01
	Cdca7	0.260914	1.11233	4	TCTACTGGTCGGATTATATG;GTCGTCCAGAGAACAAGCCA;GCTGTCACAACTGTCATCGG;TGTGGCTACCAGAAGGAACC	-0.07;0.21;0.22;0.68	46902;61442;61994;75141	7.86E-01;7.30E-01;3.79E-01;1.01E-01	4493;17640;18194;32732	1.54E+00;1.43E+00;7.49E-01;7.22E-01
	Prss53	0.260795	1.09257	4	GAAAGCTGCCTCGTGAACAT;AGAGGGTTGTCTGAACGGTG;ACACAGGCGCCAAACCCTAG;ATTGTAGAGACAGTTACAAG	-0.25;0.28;0.34;0.67	36562;64119;66870;75059	8.31E-01;5.37E-01;4.21E-01;1.03E-01	4575;12764;15515;43072	1.62E+00;1.07E+00;9.64E-01;7.16E-01
	Eif3f	0.260242	1.15001	4	CAACAGGGTTCCAATAACTC;CGATCGAGGCCAAAATGACG;GCCTAGGATGAGCTCATTTG;GGACACCCATTAAAGTGCTG	-0.84;-0.15;0.76;1.26	10277;42537;76334;79202	8.36E-01;4.67E-01;4.30E-01;9.43E-03	432;3300;37097;69357	2.02E+00;1.67E+00;6.66E-01;2.40E-01
	Atp6v1c1	0.260141	1.0928	4	TCGATAATGACCTAAAGTCT;GATATTTAGCCATATCCCAC;TTTGCTAACGCGAAGCCTGG;TCCCTTGTAGGTTGGCACGT	-0.09;-0.05;-0.05;1.22	45874;48032;48140;79117	7.56E-01;4.64E-01;4.57E-01;1.13E-02	517;31494;31603;33760	1.59E+00;1.49E+00;8.22E-01;4.65E-01
	Trim24	0.260084	1.11428	4	TGTACTACTAGGAACTTCAG;AGAGGCAACAGGTGCAACGG;GCACTAGGTGAACGTATTGG;GGTGCACTCAGATCAATCAT	-0.02;0.08;0.38;0.6	49723;54890;68171;73817	8.78E-01;5.60E-01;4.42E-01;1.32E-01	5817;11463;24744;29911	1.70E+00;1.08E+00;1.04E+00;6.33E-01
	H2afb2	0.260032	1.33731	6	AAAGATCAGCTCACCTCTGG;CCGCAGGTTGCTGGAGCTTG;AGGTGCGGGAGTGATGTTGG;ACACGGAGAACTGTCTTCAA;GGTGGAACAGCATCTGAGGG;GAACTCCAGGATGGCTACCA	-0.27;-0.05;0.33;0.37;0.5;0.69	35136;47872;66121;67833;71501;75378	1.25E+00;8.63E-01;8.41E-01;7.61E-01;4.47E-01;1.43E-01	4256;8133;11801;13513;31762;44497	2.07E+00;1.52E+00;1.44E+00;1.40E+00;9.93E-01;6.13E-01
	Olfr1145	0.259719	1.01646	4	CTCAAAAAAGTGCACTCAGT;GATGAAACATGATGAAATTG;AATTCTCAAGCTGGCATGTG;ATTTACAGGATTATCCTCAC	-0.23;-0.12;0.36;1.03	37567;44046;67538;78466	5.56E-01;4.36E-01;4.31E-01;2.56E-02	1168;12096;35588;42067	1.25E+00;1.11E+00;1.00E+00;7.05E-01
	Ccdc84	0.259619	1.04878	4	ACTCACCGTGCATAATCCTG;AACAGCACCGATCGTGCTCG;GAAAGTTGGAAAGCGACCAA;CAACCTGACAGTGCTACACG	-0.16;-0.09;0.47;0.81	41911;45771;70831;76902	6.50E-01;5.07E-01;4.46E-01;6.06E-02	2732;8803;33863;37723	1.30E+00;1.24E+00;9.08E-01;7.53E-01
	Tmem234	0.259142	1.08357	4	ATGGCCAGAGAGTTGCAGAT;GCAAGTGCGTGAGCGGACGT;TTGACTTTGGCATCAACAGG;GGCTCTCTTCGGGAATACTG	-0.71;0.22;0.46;1.06	14626;61752;70504;78641	7.40E-01;4.97E-01;3.98E-01;2.18E-02	993;9130;17882;65008	1.45E+00;1.32E+00;1.21E+00;3.53E-01
	Dennd2d	0.259142	1.10573	4	TGAAGTCCACGTGTTCAAGG;AGCATGGATACACTGAGACA;CAGAGGGAGAACCTGCTCCG;GTCATCTACCCATTCATGCA	-0.31;0.27;0.49;0.6	32926;63764;71222;73740	8.16E-01;5.20E-01;4.77E-01;1.34E-01	5894;8412;15870;46708	1.60E+00;1.27E+00;9.27E-01;6.29E-01
	Cdc14b	0.258863	1.03431	4	CATAGTGTTCATATTCGTCA;GCCATTGCTGTGCATTGCAA;TTACCATATAACACCCGACA;GCAACAATATCTGTAAACCA	-0.24;0.09;0.38;0.81	36962;55807;67987;76845	5.79E-01;5.44E-01;4.39E-01;6.19E-02	2789;11647;23827;42672	1.12E+00;1.08E+00;1.03E+00;9.00E-01
	Nostrin	0.258845	1.17995	4	AGCGATAAAGCCAACACACC;CTGGAGATTAGCTACGCCAA;GCTTGGAGCTTTCTACAAGG;CTTTATTAAAACCCAAATTG	-0.78;0.34;0.63;0.84	12170;66503;74442;77212	9.44E-01;6.72E-01;4.30E-01;5.36E-02	2422;5192;13131;67464	1.82E+00;1.65E+00;9.55E-01;2.88E-01
	Olfr463	0.258566	1.18843	4	TGAACAGCCAGCTTTGTATG;AAACCGTAACTATGATGAGG;GGTCATAAGCCATTACTGAG;AAGAAGACTATCTCCTACCG	-0.04;0.31;0.32;0.45	48338;65435;65888;70221	8.90E-01;8.32E-01;4.08E-01;2.19E-01	9413;13746;14199;31296	1.73E+00;1.62E+00;9.12E-01;4.89E-01
	Ccdc110	0.258458	1.09923	4	GAGGGGGTAAAGGAAAGCGG;GACTCTACAGAACGTCAGCA;CTAAAAGTGAAGTATACCGT;AGCACTTACAACGTCCTCGG	-0.12;0.13;0.45;0.58	43912;57488;70277;73333	7.01E-01;6.17E-01;4.91E-01;1.43E-01	6301;9357;22146;35722	1.39E+00;1.21E+00;1.19E+00;6.07E-01
	Sntg2	0.258344	1.07876	4	GATTGCACGTACTTACTGTG;TGGCCTTGTTGTATGACGAG;ACACTTCGCAGACAACCTGT;CTTTAAACAGCACCTCACAG	-0.3;0.27;0.37;0.7	33510;63880;67633;75522	8.21E-01;4.85E-01;4.33E-01;9.21E-02	4112;12001;15754;46124	1.60E+00;1.01E+00;9.49E-01;7.54E-01
	NO_CURRENT_125	0.258342	1.27581	4	CGGTCGTGACAGACCTGGTG;CGGTCGATTGTGGAGTAATG;CGGTGAGGATCCCTCTTGCG;CGTAAACCATAACGTTGGTC	0.13;0.28;0.28;0.35	57341;64131;64449;66991	1.20E+00;8.31E-01;3.93E-01;3.00E-01	12643;15185;15503;22293	2.21E+00;1.62E+00;8.45E-01;4.22E-01
	Esp3	0.258241	1.01454	4	ATTATGAAGAAAAACATCAC;TTACCATCCATGCTCACCGA;TCTTGATCCATAGTCTTAGC;GATCAAGAAAGCAAGTTCCA	-0.25;-0.0;0.38;0.91	36382;50735;67933;77762	5.33E-01;4.94E-01;4.38E-01;4.13E-02	1872;11701;28899;43250	1.06E+00;1.06E+00;1.03E+00;9.14E-01
	Hdhd5	0.257927	1.13433	4	AGGCAATGAGCTGAAATACG;GCAAGCTGGTAAACTCCCAG;CCCGCGATGTAGCCCCTCCG;GCTGCAGGTTTGTCTCCCAG	-0.37;0.37;0.43;0.6	29947;67763;69507;73914	1.02E+00;4.71E-01;4.37E-01;1.29E-01	5720;10127;11871;49687	1.95E+00;1.13E+00;8.19E-01;6.39E-01
	Aox1	0.257668	0.994743	4	GCAAGCGGCGAAGCAAGTGA;GCACTAGCAATAGTCAACTC;GTTGCCTAAGCCTTCTACCG;TGTTCTTAAAAGTCTCTAGG	-0.42;-0.06;0.28;1.24	27138;47356;64124;79152	4.58E-01;4.08E-01;3.91E-01;1.05E-02	482;15510;32278;52496	1.62E+00;8.31E-01;8.00E-01;7.24E-01
	Dnajc16	0.257655	1.12963	4	ATCTGTGTACAGATACTGCG;ACTTCCCCTTCAATGCGGAG;TCAGATCAGCAAGGCATACG;GACTCTCCACGAACTGCCGT	0.04;0.06;0.32;0.61	53284;53854;65995;73974	1.01E+00;5.41E-01;4.09E-01;1.28E-01	5660;13639;25780;26350	1.92E+00;1.04E+00;9.18E-01;6.42E-01
	Mycl	0.257654	1.01833	4	CAGACTAGGAGTGCCGTCCG;AGAGGATTTCTACCGCTCCA;TCATTCGCCGTGACTGCATG;GGTCCTTACCAGAATCGCTG	-0.26;-0.1;0.11;1.28	36196;45077;56357;79228	5.30E-01;4.41E-01;3.83E-01;8.86E-03	406;23277;34557;43438	1.70E+00;1.05E+00;7.33E-01;5.90E-01
	Olfr1249	0.257314	1.0034	4	TACATGCAAGTAGTAATAGT;AGCAAGTCTACTATCAACTT;TTCTATCATTGGCAATAATG;GATCTACATTGTGACAATGG	-0.55;-0.1;0.3;1.37	20842;45308;65254;79360	4.43E-01;4.01E-01;3.75E-01;5.97E-03	274;14381;34326;58792	1.87E+00;8.81E-01;7.39E-01;5.27E-01
	Oxsr1	0.257294	1.11777	4	GTCATGAAGCTGCTAAGTGG;ACAGTAAGCTGCTTGGACCA;GTCCTTCTAAGACTTCTCGG;ATGATAAGGAGCTGCCCCTG	-0.16;0.23;0.43;0.53	41730;62083;69731;72232	7.52E-01;6.46E-01;4.76E-01;1.69E-01	7402;9900;17551;37903	1.48E+00;1.29E+00;1.15E+00;5.57E-01
	Gm5134	0.25717	1.13055	4	CAGAACTTCTGGCATTCCGA;TGACGGGGCAGATAGCACTC;GCTCTCAACGTAAGCCACAG;ACTCGAACAGTATCTCATTG	-0.04;0.13;0.43;0.51	48682;57359;69652;71755	8.43E-01;6.13E-01;4.74E-01;1.81E-01	7879;9982;22275;30952	1.64E+00;1.20E+00;1.14E+00;5.38E-01
	Pcdh8	0.257162	1.05535	4	GAGTCTCATAGTCAAAACTA;TGCTGACGAAGGAGCCAACG;AGGCACACGCATCCCCCTGG;GACGTGCGGGCTCAAGACCG	-0.32;-0.11;0.64;0.82	32460;44694;74519;77023	6.77E-01;4.70E-01;4.39E-01;5.79E-02	2611;5115;34940;47174	1.66E+00;9.26E-01;9.10E-01;7.22E-01
	Cox14	0.257111	1.02327	4	GCGCAGCTGGAGGTAACGGT;CACAGTGAGGAGCATCATCG;GCCAAGCAGCTAGCCGATAT;GGTAACCCCCATACACAGTG	-0.28;-0.15;0.5;0.96	34603;42189;71640;78088	5.34E-01;5.03E-01;4.29E-01;3.40E-02	1546;7994;37445;45031	1.31E+00;1.14E+00;9.90E-01;6.57E-01
	Klrb1a	0.256366	1.10514	4	AAAGCCACCCAGGACTCCAG;AAAATAAAGTGACTGACCTG;CAATCAGGGTCACGACAAGG;GTCTTGAATGAGCATCAAAG	-0.21;0.26;0.4;0.57	38892;63424;68852;73205	8.02E-01;5.82E-01;4.56E-01;1.46E-01	6429;10782;16210;40742	1.57E+00;1.16E+00;1.09E+00;6.01E-01
	Chd3	0.25609	1.0242	4	GGTCACATATACGGGCGACA;TCCACCGCATCATTAACCAT;GGGCGCTTATTAAGTCATCA;GGAAGAACGAATCACACAGG	-0.34;-0.02;0.02;1.36	31523;49683;52230;79336	4.81E-01;4.57E-01;4.11E-01;6.49E-03	298;27404;29951;48110	1.83E+00;8.77E-01;8.75E-01;5.15E-01
	Klhl29	0.256054	1.05667	4	TGGTGGCAGGAACACTACTG;GGGAGTCACCCCGATGACGG;CAATGACAGCCTCAATACCA;TGCTAGAGTTTGTCTACACG	-0.46;0.02;0.65;0.82	25109;51980;74694;76952	6.89E-01;5.11E-01;3.93E-01;5.95E-02	2682;4940;27654;54525	1.69E+00;9.61E-01;9.15E-01;6.58E-01
	Klrc2	0.255809	1.15839	5	TCACACGCCTTGCTCTCCAA;ACTGAAACGGAACTGCGCCT;AATCTTGGAATGACAGTTTG;AATCAATAAGGTAAACCAGA;TCTGGGTTCTAACCAAGAAG	-0.12;0.02;0.1;0.27;1.02	43968;51872;56046;63794;78430	9.54E-01;7.45E-01;5.14E-01;3.88E-01;3.31E-02	1204;15840;23588;27762;35666	1.74E+00;1.32E+00;1.15E+00;8.90E-01;6.92E-01
	Fzd7	0.255695	1.01623	4	GTGGGGCAGAACACGTCCGA;GCTGGGCCACACGAACCAAG;GGACGATGGCTACCGCACGG;GCTGGCGCGGACACGAGAAG	-0.38;0.11;0.15;1.14	29575;56732;58563;78901	5.99E-01;4.33E-01;3.76E-01;1.60E-02	733;21071;22902;50059	1.45E+00;1.17E+00;8.06E-01;6.44E-01
	Acsbg1	0.254688	1.14249	4	GGACCCTGGTAAACACACTG;CTGCCGAGCCAATGTCATCG;AGCACTATGGACAACCCGGG;GGATTACCTAGTGTTAGCCA	-0.3;0.37;0.41;0.53	33824;67769;69036;72387	1.02E+00;4.90E-01;4.60E-01;1.66E-01	7247;10598;11865;45810	1.95E+00;1.10E+00;9.61E-01;5.63E-01
	Wbp4	0.254667	1.06721	4	TGAAAGAGGAAAGAATCACA;TTCTCACAGTGATTCCGAAG;TATTATAATACAGAAACAGG;TTTCTGTTGATTTGACGTAG	-0.88;0.08;0.27;1.55	9056;54933;63926;79493	5.61E-01;4.99E-01;3.89E-01;3.06E-03	141;15708;24700;70578	2.15E+00;1.08E+00;8.23E-01;2.10E-01
	Pomgnt2	0.254426	1.12656	4	GTGGCTCTGCTACTCCAATG;AGACGTGCATGAGGTTATCG;AAAGCCGTATTGGTACCAGG;TCAACCACGGTAGCCCCGCG	-0.55;0.31;0.59;0.67	20707;65561;73538;75104	8.96E-01;6.18E-01;3.75E-01;1.02E-01	4530;6095;14073;58927	1.74E+00;1.52E+00;7.19E-01;5.23E-01
	Lamtor4	0.254245	1.15035	4	CATCCACACACAGTCATCTG;ATGGTGCAACTGGAAGCCAC;AGACTTCCGCACTGACCCAA;TGTGCTGACCAACTCCGAGA	-0.5;-0.38;0.83;1.06	23341;29108;77134;78633	9.43E-01;4.91E-01;3.83E-01;2.20E-02	1001;2500;50526;56293	2.26E+00;1.32E+00;6.03E-01;4.28E-01
	Cdcp2	0.254082	1.07773	4	GCCCACGGGCACCACTACTG;CTGGAATACCATGACACCTG;AAGTCTGTACCCCTACAACA;CTGAGGCGCGGATCAGCCAG	-0.03;-0.02;0.38;0.69	49084;49669;68086;75300	8.56E-01;4.81E-01;4.41E-01;9.72E-02	4334;11548;29965;30550	1.66E+00;1.04E+00;8.76E-01;7.35E-01
	Usp25	0.254019	1.08287	4	TACCATCACAGTCCTTACCA;CAACGACAGGTACATCAGCG;GAAATAGAAAATGACACGCG;TCCTTACACTCCGATAACTC	-0.29;0.19;0.52;0.59	34487;60461;72017;73669	6.98E-01;5.48E-01;5.01E-01;1.35E-01	5965;7616;19173;45147	1.37E+00;1.35E+00;9.86E-01;6.25E-01
	Cercam	0.25367	1.02934	4	GTGTGCCACAGATCACAACA;CCAGGGCTACTATCGCCGCA;TATCCTCAAACATCTCGGTG;CATTCATGTACCCGTAACGA	-0.23;-0.06;0.03;1.27	37466;47655;52675;79213	5.54E-01;4.60E-01;4.07E-01;9.19E-03	421;26959;31979;42168	1.68E+00;1.10E+00;8.10E-01;5.22E-01
	Aox4	0.252993	1.14825	4	ACAGCCATATTCCTAATCTG;TTGGTCGATATCCAGTGCAT;GGTGTTCCCCATGACGAGTG;GGGTATTAAACATGCCACAG	0.03;0.03;0.46;0.49	52511;52625;70602;71182	9.82E-01;5.21E-01;5.00E-01;1.95E-01	8452;9032;27009;27123	1.87E+00;1.22E+00;9.87E-01;5.18E-01
	Capn2	0.252938	1.15476	4	AAATCTAACCGAACGGCAGG;GCTGCGGAACGAGTGCCTGG;CAGACCCCACTACTTACCCA;TCAGTACCTAATTAAGCTGG	0.03;0.2;0.24;0.54	52608;60976;62451;72597	9.86E-01;7.14E-01;3.81E-01;1.61E-01	7037;17183;18658;27026	1.88E+00;1.40E+00;7.65E-01;5.72E-01
	Begain	0.252825	1.06638	4	TAGGAAGGACTGCAATCTAG;GCAGAATTCCACCGACAGCG;GTAGGCCGGATGGCACAGTG;CCGACTTCTCCACTCCGTCG	-0.19;-0.04;0.59;0.65	39833;48618;73572;74744	6.20E-01;6.02E-01;4.69E-01;1.10E-01	4890;6062;31016;39801	1.53E+00;1.20E+00;8.41E-01;6.92E-01
	Cxcl1	0.252747	1.22097	4	CAGCGCAGCTCATTGGCGAT;TGCACAGAGAAGCGAGCGGG;ACTTCGGTTTGGGTGCAGTG;CTTGAGGTGAATCCCAGCCA	-0.52;0.51;0.51;0.52	22078;71669;71847;71949	1.31E+00;5.42E-01;3.78E-01;1.76E-01	7685;7787;7965;57556	2.44E+00;1.33E+00;5.64E-01;5.46E-01
	Gatc	0.252482	1.09739	4	CAAAGCGAATCCACAGGGAA;GGCGTGCAGCTGATCCGCAA;GCCCCTAGAGTCGGTACTGG;CAGATGCTCGATTACCGCGG	-0.15;0.23;0.35;0.58	42388;62297;66906;73441	7.59E-01;6.62E-01;4.21E-01;1.41E-01	6193;12726;17337;37246	1.49E+00;1.32E+00;9.66E-01;6.13E-01
	Kbtbd4	0.252304	1.0943	4	ATGTTCCCAGAACCCAACAG;GATGCCATATATTCCCTGGG;TAGTTGACTATATATACCAT;TTACATTTCCACATGCGTCG	-0.07;0.15;0.32;0.6	47119;58707;66021;73772	7.93E-01;6.47E-01;4.09E-01;1.33E-01	5862;13613;20927;32515	1.56E+00;1.27E+00;9.19E-01;6.31E-01
	Tssc1	0.252218	1.27469	4	CGTCCCAACCAAGAAGCGAA;AGCTGAAGTTCACCGCGGGG;GCAAGTGACACGACCCTCCG;GTGTCGTGTGGGAACCGATG	0.14;0.26;0.29;0.32	58004;63409;64681;66047	1.23E+00;8.02E-01;3.95E-01;3.25E-01	13587;14953;16225;21630	2.26E+00;1.57E+00;8.55E-01;4.10E-01
	1700019A02Rik	0.25211	1.02359	4	TCATTGATGCAATACTCCTG;TTCTTCCAGTTCTTCTAAAT;AGAAGAATCCGACATGTTTG;GACCTTGGCTACCCGGATGG	-0.28;0.17;0.27;0.85	34613;59420;64011;77278	6.67E-01;5.03E-01;3.90E-01;5.21E-02	2356;15623;20214;45021	1.31E+00;9.91E-01;9.66E-01;8.26E-01
	Eef1a2	0.252102	1.08747	4	CTATGATGAGATTGTTAAGG;TCTCCACTCACATTAGGTGA;GTCTGTGGAAATGCACCATG;AGTGTGGTGGCATCGACAAG	-0.12;0.0;0.55;0.58	44037;50877;72695;73453	7.04E-01;5.77E-01;4.96E-01;1.40E-01	6181;6939;28821;35597	1.42E+00;1.40E+00;9.17E-01;6.13E-01
	Nap1l5	0.251804	1.11975	4	GATCGAGGCCAAGTTTGACA;GCTTGGGCGCGTTCTCCGCG;CCATTACCTCGTCCTCGGCG;GGTGGCGAAGATGCCGCGAC	-0.17;0.25;0.43;0.49	41136;63038;69748;71366	7.87E-01;6.32E-01;4.77E-01;1.90E-01	8268;9886;16596;38498	1.54E+00;1.26E+00;1.15E+00;5.24E-01
	Olfr1495	0.251652	1.04711	4	TAATAGGAGCCACATCACAG;CTAGGATACTAACTACATAG;CCGGAACATTGGTTAAGACA;CAATACCACCATTATCTGGG	-0.32;-0.2;0.64;0.88	32817;39473;74492;77532	6.75E-01;4.75E-01;4.26E-01;4.64E-02	2102;5142;40161;46817	1.66E+00;1.01E+00;9.23E-01;5.95E-01
	B3gat1	0.251609	1.08473	4	CCACGCAACTATAAGCTGCG;CATGTCCGACCGTGACATCG;TGGTGGAGGATGCTCCACGC;GGGAAGTGACCCCCGCCATG	-0.0;0.06;0.15;0.8	50767;54055;58637;76732	9.16E-01;5.45E-01;3.76E-01;6.45E-02	2902;20997;25579;28867	1.76E+00;1.05E+00;8.85E-01;6.46E-01
	Lgals9	0.251195	0.999944	4	TTTACTGGACCAATCCAAGG;CCGCGTACCCTACCACCTCG;GGTGCTGTGAACCATATGGA;ACACGAAGCAGAACGGACAG	-0.46;0.11;0.28;1.07	25120;56748;64255;78680	5.99E-01;3.93E-01;3.92E-01;2.09E-02	954;15379;22886;54514	1.34E+00;1.17E+00;8.37E-01;6.58E-01
	Krtap27-1	0.251178	1.04482	4	TGGCCATGTAACTTGCAGGT;AGGATTAGAGTTGTGTGTGA;TCTGGGAACTTTGCACACAG;GCAGGTAGAAGTTTCACTGT	-0.56;0.25;0.32;0.99	20281;63157;66029;78307	7.92E-01;4.09E-01;3.75E-01;2.92E-02	1327;13606;16477;59353	1.55E+00;1.20E+00;9.19E-01;5.11E-01
	Pla2g2d	0.251172	1.03764	4	AGATGGTCACACACATGACG;GGTATAACTGCAACCCAGGG;TGGCCCTACGGCTGTCACTG;GGAGGGGATTTACCAGTCTG	-0.16;0.13;0.17;0.87	41468;57552;59525;77432	6.40E-01;6.18E-01;3.75E-01;4.87E-02	2202;20109;22084;38166	1.28E+00;1.21E+00;9.93E-01;6.70E-01
	Col6a6	0.251088	1.02952	4	TGAGGCTCAGGACATAGTAA;ATGGGCAGCAGGATCAACGC;ATGGGTGGGAATACCAACAC;TGCGTCATGAGATTCCCCGT	-0.5;-0.08;0.61;0.98	22980;46142;74060;78208	6.47E-01;4.48E-01;3.81E-01;3.14E-02	1426;5574;33492;56654	1.59E+00;1.17E+00;7.63E-01;5.91E-01
	Olfr1234	0.250918	1.14583	4	CATACAAAGCCCTATAAGGT;AGAAGTACATAGGAGAGCCG;TTGAGTCATACAAGCCCGGA;ACACACTCGTCGATTCATGA	0.04;0.15;0.3;0.52	52897;58746;64987;71922	9.98E-01;6.49E-01;3.98E-01;1.77E-01	7712;14647;20888;26737	1.90E+00;1.27E+00;8.69E-01;5.45E-01
	Aqp8	0.250878	1.02983	4	TTGAGAATAGTCCGAATACT;ACCATGTATAGTGGAACTTG;GGGACCACTCACTTTAGCCA;GAATTAGCAGCATGGTCTTG	-0.38;-0.09;0.61;0.86	29347;45684;73998;77387	6.44E-01;4.45E-01;4.30E-01;4.97E-02	2247;5635;33950;50288	1.59E+00;9.85E-01;7.99E-01;7.50E-01
	Vwa5b1	0.250727	1.25419	4	TGAGCTGTATGGTCACAACA;CCATAGACCCTACTTAACGA;TGTGCCAAGAACGTCAACCA;GAGGAAGATAAACTCCCCGT	0.12;0.25;0.29;0.34	57027;63204;64694;66739	1.18E+00;7.94E-01;3.95E-01;3.07E-01	12895;14940;16430;22607	2.19E+00;1.55E+00;8.56E-01;4.19E-01
	Pgp	0.25064	1.07642	4	ATGAAACGGCCGTTCTCTAG;AGGCCGTGCCGAACACCTCG;CAAGACTCGCACGGCCTACG;GCACGGCTAGCCAGTCGCTG	-0.22;-0.21;0.67;0.76	37988;38596;75087;76403	7.18E-01;5.64E-01;4.27E-01;7.19E-02	3231;4547;41038;41646	1.76E+00;1.13E+00;8.44E-01;5.76E-01
	Stil	0.250623	1.09627	4	TTCAGGGAACCTATAAACAT;TCGGGCGTCCTACTCTCACA;GCATCCACTTGAGTGAAAGA;GCATTACCTTCTGACTCACT	-0.08;0.03;0.51;0.54	46190;52715;71684;72617	7.65E-01;5.36E-01;5.22E-01;1.60E-01	7017;7950;26920;33444	1.51E+00;1.31E+00;9.90E-01;5.73E-01
	Tex28	0.250592	1.13254	4	ATTCTCAGACAAAAAGTATG;GTGAGCTTGCCCGCAATGTG;GCATCCTAGACAATCACTGA;ACAAGCTCAGTGCTGAAAGT	0.05;0.14;0.2;0.62	53404;58109;60727;74191	1.02E+00;6.32E-01;3.76E-01;1.23E-01	5443;18907;21525;26230	1.93E+00;1.24E+00;7.06E-01;6.55E-01
	Aspg	0.250556	1.04028	4	CCTGTGCATACTCTTCATCG;AGACACTACGCACAGTACCA;GGGCAATCGGACAACCAAGG;AGGTACCTATCCACGCACTG	-0.53;0.22;0.41;0.89	22002;61988;69043;77634	7.48E-01;4.60E-01;3.78E-01;4.42E-02	2000;10591;17646;57632	1.47E+00;1.10E+00;1.03E+00;5.62E-01
	Olfr725	0.250375	1.15235	5	TGTATCCATCTATTTGGTGG;TGACCAGAGTGATACACACA;CATCCATACAATGAGCCAGT;AGTTGCCCAGCAGTATTGCT;GTGAGTCTGAAGTCACTGTG	-0.53;0.14;0.18;0.63;0.84	21892;57841;60061;74290;77151	9.66E-01;5.95E-01;5.86E-01;4.20E-01;6.88E-02	2483;5344;19573;21791;57742	1.69E+00;1.44E+00;1.07E+00;8.62E-01;6.98E-01
	Sphkap	0.250245	1.12412	4	GGAAGGATGGGATTACCACA;GATCTCAAAGATGATGCAGT;CCACCATGGAAAACTCTGTG;GTAGCTCGTTCCATGAACGA	0.06;0.07;0.27;0.6	53930;54784;63774;73901	1.04E+00;5.58E-01;3.88E-01;1.30E-01	5733;15860;24850;25704	1.96E+00;1.08E+00;8.16E-01;6.38E-01
	Mbd4	0.250221	0.992116	4	GCCTGTGCAAGGGAGACTGT;TGCGCTCACTGCTTATCACC;CCGAAAGGGAGCATCAATCC;TCAGAGTCGCCAGAAAGCAG	-0.4;0.06;0.22;1.12	28194;54105;61827;78852	5.46E-01;4.18E-01;3.78E-01;1.71E-02	782;17807;25531;51440	1.42E+00;1.05E+00;7.59E-01;7.43E-01
	Klra8	0.250162	1.26046	4	TGTTGCTGCAGTTATGGCGG;TCAGATTCTTCACGAGACAC;TTACCAGCCGAAGGGAACAG;TGTTCAACCCTGAAGACTTG	0.13;0.24;0.3;0.33	57819;62460;65169;66289	1.22E+00;7.65E-01;4.00E-01;3.19E-01	13345;14465;17173;21815	2.25E+00;1.50E+00;8.78E-01;4.13E-01
	Mbd3	0.249344	1.11337	4	CTTTCCGGTGCGGAAGTCGA;AAGAATCATAGCGCACACGC;TATAGTAAAAGACATCCCTG;AGTCTGCCGTACAGGCAGCG	-0.82;0.31;0.37;1.14	10746;65539;67773;78903	8.95E-01;4.57E-01;4.35E-01;1.60E-02	731;11861;14095;68888	1.74E+00;1.45E+00;1.02E+00;2.52E-01
	R3hdm4	0.249245	1.12859	4	CAGCCTGGTCTCCCCGCTCG;ATGCGCCTGAAGCACTCGTG;TACTTGGAGGATGAGAGCCA;TTAGGGTCTCACCTCCACAT	-0.06;0.25;0.28;0.53	47576;63048;64202;72211	8.07E-01;7.87E-01;3.91E-01;1.70E-01	7423;15432;16586;32058	1.58E+00;1.54E+00;8.34E-01;5.56E-01
	Vps25	0.249091	1.67791	4	AGCTTGACGTTGTTGAAAAG;CGGCAGGTTACAGCCGAACG;CTAGCTTCCTGATCATGTGG;ACAATCTGAATTGACTCCAC	-1.19;-0.79;1.3;1.68	3436;11703;79254;79540	1.73E+00;1.03E+00;8.20E-01;2.03E-03	94;380;67931;76196	3.87E+00;2.33E+00;4.38E-01;7.66E-02
	Cdkn2a	0.248897	1.0818	4	GGGCCGCCCACTCCAAGAGA;CTTTCGTGAACATGTTGTTG;GCAGCTCTTCTGCTCAACTA;GCGCTGCGTCGTGCACCGGG	-0.52;0.22;0.6;0.7	22241;61647;73798;75507	7.37E-01;6.32E-01;3.79E-01;9.24E-02	4127;5836;17987;57393	1.56E+00;1.45E+00;7.53E-01;5.69E-01
	Irf5	0.24887	1.02494	4	AGGGCTTCAGTGGGTCAACG;CTCACCATCAGCAACCCACA;AAGGAATAGGGTGCGTTGGG;CCCAGAACGTAATCATCAGT	-0.22;0.13;0.33;0.76	37908;57367;66377;76363	6.14E-01;5.62E-01;4.14E-01;7.28E-02	3271;13257;22267;41726	1.20E+00;1.12E+00;9.37E-01;8.39E-01
	Tcof1	0.248799	1.04346	4	GTCCCATTGTAAGGCAGGAG;TGAGGACGATTCTGATAGTG;TTCTCCAGATAAAACCTGTG;ACCTGCTAAACCAGCCAGGG	-0.23;0.12;0.45;0.66	37408;57040;70242;74851	6.06E-01;5.53E-01;4.90E-01;1.08E-01	4783;9392;22594;42226	1.19E+00;1.18E+00;1.10E+00;7.00E-01
	Fam222b	0.248746	1.00598	4	GGGGAACCTTCACACTGTTG;GTGGTGGTGGTATACCCTGA;TCCCATGGAGCACACCCACG;GGGTGGCCGCCATTGAAAGG	-0.4;0.0;0.51;0.89	28011;50979;71842;77564	5.42E-01;4.97E-01;4.16E-01;4.57E-02	2070;7792;28655;51623	1.33E+00;1.02E+00;9.23E-01;7.53E-01
	Apob	0.248668	1.07011	4	GCTGGTAGTGACATCAACAG;AGTCTCACCTGTTAACTGCG;ATGTTGCATGAGTATGCCAA;GAATGGAATCATGCCCATTG	-0.07;0.12;0.29;0.65	46792;57126;64798;74751	7.83E-01;6.08E-01;3.96E-01;1.10E-01	4883;14836;22508;32842	1.54E+00;1.19E+00;8.60E-01;6.93E-01
	Zfp646	0.248418	0.99554	4	GGCAAGACCTATCGCCACGG;GGAACATCAGCAGTCCCATG;ACATCATAGCGTGACCCACA;CATTACACTTATAGGGACGA	-0.3;-0.02;0.42;0.89	33924;49627;69323;77603	4.92E-01;4.80E-01;4.66E-01;4.49E-02	2031;10311;30007;45710	1.12E+00;1.02E+00;9.64E-01;8.75E-01
	Atxn7l3	0.2482	1.24285	4	GTACACCGGGCTGTTAAGTG;GCAGCCGAATCGCCAACCGT;TGTCCAAAGATGTCCAACCC;TCTACTCACCTTAAAAGGAT	-1.09;-0.21;0.85;1.45	4828;38505;77261;79428	9.63E-01;6.97E-01;4.27E-01;4.48E-03	206;2373;41129;74806	2.30E+00;1.99E+00;5.74E-01;1.09E-01
	Rnf8	0.248077	1.05837	4	TAAACGTCAAGAGACAGACT;GAACGTCTGGCACCATTACA;AGAGGAAATTCAGTTCGCCT;TTTCAGGTGACCATAGGACG	-0.37;-0.05;0.69;0.72	29747;48170;75365;75841	7.41E-01;4.65E-01;4.35E-01;8.48E-02	3793;4269;31464;49887	1.81E+00;8.26E-01;8.12E-01;7.84E-01
	Cyp2d40	0.248068	1.00872	4	ACGAGGTCATAGGGCAGGCA;GCAAAAGACATTTCTCACCA;CTTTATGGCTGAGATGGAGA;ATGCAGAATCATGAGTAGCA	-0.25;-0.09;0.47;0.85	36764;45922;70844;77269	5.40E-01;5.07E-01;4.47E-01;5.24E-02	2365;8790;33712;42870	1.24E+00;1.08E+00;9.64E-01;7.57E-01
	Olfr943	0.247921	1.18025	4	CAGGGAAGTATAAATCTGAG;ATCTGTGCATCTGTAAACAC;TGACTTCTGTCAGTCCACAG;AGGAATATATCTGATCACTG	0.04;0.19;0.35;0.41	53222;60454;67007;69045	1.01E+00;6.98E-01;4.23E-01;2.48E-01	10589;12627;19180;26413	1.92E+00;1.37E+00;9.71E-01;4.60E-01
	Haus8	0.247797	1.63036	4	TGTGTTAGAGCGCTTCAAAG;ACTTACCGTCGATGGCAGAG;GTCTCTCGCAGGAAGAAGAG;CCCGTAGATGGAGAACAACC	-1.73;0.33;1.0;1.39	272;66273;78346;79378	1.87E+00;1.21E+00;9.32E-01;5.57E-03	257;1288;13361;79362	2.82E+00;1.89E+00;1.80E+00;5.92E-03
	Gabrr1	0.247769	1.04962	4	ACGACCATGATTTCAGCATG;AGTGACCGCGATGTGCAACA;TGGTGTGGAATTCTTGAATG;GGCCATCAAAGGTCATGCTG	-0.22;-0.02;0.58;0.66	37917;49684;73338;74863	6.07E-01;5.63E-01;4.81E-01;1.07E-01	4771;6296;29950;41717	1.50E+00;1.12E+00;8.77E-01;7.01E-01
	Avpr2	0.247762	1.03428	4	CCTATGCTGGCATACCGCCA;AGTTCAGCCCGGACTAACAG;CGGCCCGACACAAGGCATCA;CTTGGGGCCCTAATACGACG	-0.29;0.19;0.37;0.73	34138;60291;67625;75956	6.93E-01;4.95E-01;4.33E-01;8.21E-02	3678;12008;19343;45496	1.36E+00;1.01E+00;9.73E-01;7.95E-01
	Vax2	0.247638	1.15987	4	TTGCCACCTCCAACGTCCTG;AAGTACGGGTCCGCTTGGGT;TTCTCACCTGAGTCTCAGAG;GCTCTCGGCCCACCACATAC	0.05;0.15;0.32;0.46	53764;58586;66108;70524	1.03E+00;6.44E-01;4.10E-01;2.11E-01	9109;13526;21046;25870	1.95E+00;1.27E+00;9.23E-01;4.98E-01
	Rpl3l	0.247527	1.06091	4	ATGGAGATTCAGCTGAATGG;GGCTACGTAGCCACTCCGAG;TGATGTCATTGCTGTCACGA;GTGACTCACTGAGTCCGGGT	-0.61;0.29;0.36;0.94	18413;64849;67396;77998	8.63E-01;4.29E-01;3.76E-01;3.60E-02	1636;12238;14785;61221	1.68E+00;1.11E+00;9.94E-01;4.57E-01
	Atp8b5	0.247475	1.11551	4	ATGGATAGCACCACAATCAG;GTTCTGACTGGCGATAAGCA;AGTGTGGAAATAATAAGACT;GCTCTCGGTAAGCTACCATG	-0.51;-0.51;0.62;1.39	22539;22739;74156;79377	6.53E-01;6.03E-01;3.80E-01;5.59E-03	256;5478;56894;57095	1.89E+00;1.61E+00;5.78E-01;3.80E-01
	Dars2	0.247349	1.10137	4	TCTTCTAAGAAAATGCCGAC;TAGACAGCCAGAGTTCACTC;AAAGCAATATGTGTTCATGA;GTTGCTCGGACCAACACATG	-0.6;0.34;0.48;0.78	18553;66583;71000;76549	9.48E-01;5.12E-01;3.76E-01;6.86E-02	3085;8634;13051;61079	1.83E+00;1.25E+00;8.61E-01;4.61E-01
	Ndufs1	0.247252	1.00477	4	AATGGATCTCTGATAAAACC;TAGAGGTTAGGGCCCCTACA;TGATGGTCAGTCTGTCATGG;TGTCCTATTTGTGACCAGGG	-0.27;-0.23;0.39;1.09	35633;37456;68546;78757	5.20E-01;4.50E-01;4.29E-01;1.92E-02	877;11088;42180;44001	1.37E+00;1.06E+00;1.03E+00;5.54E-01
	Aldh1b1	0.247174	1.04515	4	CATCACTGGCTACGGCCCCA;CAACAACGAGTGGCATGATG;TTCACCCGACATGAGCCAGT;GTTCCACAAGATCAGCTAGG	-0.15;-0.07;0.52;0.69	42158;47111;71916;75371	6.56E-01;5.44E-01;4.56E-01;9.56E-02	4263;7718;32523;37476	1.34E+00;1.31E+00;7.93E-01;7.41E-01
	Ptk2	0.246937	1.06141	4	TCTTTGTCAAATCTGTACAC;GATCGGTCGAATTGAAAATG;CAAGCAGCCTACTTACTCGA;ACTCCATGATTATCCAGACA	-0.6;0.28;0.42;0.89	18555;64296;69286;77642	8.38E-01;4.66E-01;3.76E-01;4.40E-02	1992;10348;15338;61080	1.64E+00;1.12E+00;1.03E+00;4.61E-01
	Ube2s	0.246727	1.04166	4	GGGCATACGACATGTGCTGC;ACACTCACCAGGGCCCTCGA;AGACTTTAATGCCATCAGGT;TCACCTCCTTGTACACTAGG	-0.59;-0.16;0.64;1.1	19060;41917;74493;78779	6.75E-01;4.28E-01;3.75E-01;1.87E-02	855;5141;37717;60574	1.66E+00;1.38E+00;6.50E-01;4.75E-01
	Smarca2	0.246562	1.09839	4	CTTTCTCAGACCCGTCCGTG;TGTACTCGTAAGTAGTCAGG;TTTACGCACCAAAGCAACCG;AGAGAGTGAATCGGACTACG	-0.09;0.13;0.44;0.51	45850;57568;69840;71716	7.55E-01;6.18E-01;4.79E-01;1.82E-01	7918;9794;22066;33784	1.49E+00;1.21E+00;1.16E+00;5.37E-01
	Strc	0.246523	0.989581	4	AGGGCCGGAGAAGTGTACTG;CATGTCGATAAAGAGTTGGG;GCTTTACCAAAGGACGACTG;TGTTATTAGAGGGTACACGC	-0.49;0.04;0.39;1.06	23546;52856;68244;78617	5.25E-01;4.44E-01;3.84E-01;2.23E-02	1017;11390;26778;56088	1.31E+00;1.05E+00;9.96E-01;6.09E-01
	Lrrc3b	0.246493	0.986756	4	CTAGGATTGCTAACAACCCA;CCTGTTGTCAGACAAGTCCA;TAAGCACTCTCAGTTGATGG;GGTGACATTTAACCCTCCAG	-0.31;-0.12;0.17;1.25	33314;43909;59561;79163	4.82E-01;4.35E-01;3.75E-01;1.03E-02	471;20073;35725;46319	1.63E+00;9.41E-01;7.01E-01;6.71E-01
	Mcpt8	0.246482	1.14725	4	AGCAAATCAGTCTATCGCTG;CAGAGTCCAAACCCCACTCC;TATTGCCCTTCCAAAGAGCA;TCATTGTCAAAGCTCTCGTG	0.01;0.2;0.3;0.48	51676;60702;65054;70953	9.50E-01;7.05E-01;3.99E-01;2.00E-01	8681;14580;18932;27958	1.82E+00;1.39E+00;8.72E-01;5.11E-01
	Zfp385a	0.246313	1.1247	4	CAAGGGTCCTCCAAAAGTGT;CAGCTTGAGGCACATAACAA;GCTACACCATCCCCACTCGG;TCGGGACAGGGTGTAACCAA	-0.09;0.23;0.38;0.47	45519;62284;68048;70711	7.59E-01;7.45E-01;4.40E-01;2.06E-01	8923;11586;17350;34115	1.49E+00;1.47E+00;1.03E+00;5.03E-01
	NO_CURRENT_297	0.246149	0.996357	4	TTGTCGCTAACTCAGAATAG;TTGTCAACTTCGGCCAACGC;TTGTTTAAACTTTCTGACGA;TTGTTTCAGCCTTGAGCGCG	-0.33;-0.06;0.48;0.89	31882;47455;71157;77620	5.17E-01;4.62E-01;4.59E-01;4.45E-02	2014;8477;32179;47752	1.27E+00;1.03E+00;8.88E-01;8.03E-01
	Ppp1r15a	0.246082	1.21136	4	CAGCCTCAGCATTCCGACAA;AAGTCCCCAAGTTTCAGGAG;GGAGGCAGAACATCAAGCCA;CAGCGATTCGGATTCAGCTG	-0.04;0.34;0.34;0.35	48622;66600;66656;66911	9.49E-01;8.41E-01;4.18E-01;3.02E-01	12723;12978;13034;31011	1.83E+00;1.64E+00;9.52E-01;4.21E-01
	Lce1l	0.245747	1.30147	7	TTAGGAGTCTGGCATTTGGG;TGGTGGTTGCTGCAGTTCTG;GAGATCTGTGAGGCCTGTGG;ACACAGGAGGGCACTTGGGA;GGTGGTTGCTGCAGCTCTGG;GGGTGCACTTGGGAGGAGGC;GCTGCTGCCTGAGCCACCAC	-0.33;-0.11;0.13;0.16;0.32;0.34;1.21	31823;44889;57481;59125;65827;66688;79097	1.10E+00;9.77E-01;8.83E-01;7.41E-01;6.13E-01;4.06E-01;2.05E-02	537;12946;13807;20509;22153;34745;47811	1.74E+00;1.57E+00;1.55E+00;1.34E+00;1.20E+00;1.07E+00;6.41E-01
	Aph1a	0.245641	0.995903	4	TGACAGACCGATCAGATGCA;GGGTTATCATCCTGGTGGCG;TTTCCCAGGAAGGCAGATGA;GCTCACCATAGGCCATCTGT	-0.24;-0.18;0.35;1.05	37204;40326;67193;78583	5.49E-01;4.26E-01;4.26E-01;2.31E-02	1051;12441;39308;42430	1.29E+00;1.09E+00;9.82E-01;6.13E-01
	Apaf1	0.245521	1.22718	4	CATCCTGAGAAAAACACGCG;GAAGAAATCATTTGACCCAG;GCTTCCACTTAATATTGAGG;TACAACGCTCTGCTACACGA	0.15;0.18;0.25;0.4	58701;59988;63162;68634	1.27E+00;6.84E-01;3.84E-01;2.58E-01	11000;16472;19645;20934	2.32E+00;1.34E+00;7.92E-01;4.51E-01
	Efnb2	0.245519	1.01315	4	CTGGTACTATACCCACAGAT;GCACCGATGGCAACAGCGCG;GGTCTGGCACAGTTGAGCAG;GAATTCAGCCCTAACCTCTG	-0.16;0.04;0.17;0.93	41549;53195;59415;77925	6.42E-01;5.30E-01;3.75E-01;3.77E-02	1709;20219;26439;38085	1.28E+00;1.09E+00;1.01E+00;6.67E-01
	Evi2	0.245475	1.59069	8	GGATAACATCAGAGAGAGTG;TTATACTGTGGAAATACTTG;CAGTTGTCTCACTTATGACC;GAATTATAGGTAGAAGGTGA;ATATGGCAGCAATTGCATTG;TCAGTTGTAACATATAACGA;CTATACTCATGATTATACTG;CTCACTTCAGAACCACCAAG	-0.23;-0.14;0.19;0.22;0.4;0.46;0.53;0.55	37646;42689;60338;61911;68578;70350;72200;72749	1.69E+00;1.37E+00;1.20E+00;1.15E+00;1.10E+00;7.43E-01;4.25E-01;3.14E-01	6885;7434;9284;11056;17723;19296;36945;41989	2.49E+00;2.22E+00;1.84E+00;1.84E+00;1.70E+00;1.32E+00;8.68E-01;4.35E-01
	Evi2b	0.245475	1.59069	8	GGATAACATCAGAGAGAGTG;TTATACTGTGGAAATACTTG;CAGTTGTCTCACTTATGACC;GAATTATAGGTAGAAGGTGA;ATATGGCAGCAATTGCATTG;TCAGTTGTAACATATAACGA;CTATACTCATGATTATACTG;CTCACTTCAGAACCACCAAG	-0.23;-0.14;0.19;0.22;0.4;0.46;0.53;0.55	37646;42689;60338;61911;68578;70350;72200;72749	1.69E+00;1.37E+00;1.20E+00;1.15E+00;1.10E+00;7.43E-01;4.25E-01;3.14E-01	6885;7434;9284;11056;17723;19296;36945;41989	2.49E+00;2.22E+00;1.84E+00;1.84E+00;1.70E+00;1.32E+00;8.68E-01;4.35E-01
	Pdyn	0.245466	1.0667	4	GTGCAGTGAGGATTCAGGAT;TAACATTAGAGGGCATCACG;ACTCCTTACCAGCGTCCCAG;CAACGGAAAAGAATCTGAGC	-0.15;0.21;0.3;0.63	42225;61174;65042;74351	7.21E-01;6.58E-01;3.99E-01;1.19E-01	5283;14592;18460;37409	1.42E+00;1.31E+00;8.72E-01;6.66E-01
	Usp8	0.245453	1.03772	4	CTGAACTAAACCAGTCGAGA;TCTTTCAACTAGATACGAAG;GCAGTTTACAACCAATGCTA;GGGGGAATGGTAGTAACGAA	-0.2;0.19;0.24;0.75	39299;60448;62603;76254	6.98E-01;5.91E-01;3.81E-01;7.53E-02	3380;17031;19186;40335	1.37E+00;1.18E+00;8.27E-01;7.71E-01
	Ano6	0.245162	1.04776	4	CAGATTCAACTATGAGTCGG;TGAAGAAGGAATCTCTATCG;GGTGATAAACGAGATCACTC;CAAATTCGTGGGCTATCCCG	-0.07;0.0;0.07;0.97	46911;51012;54836;78186	7.87E-01;4.97E-01;3.91E-01;3.19E-02	1448;24796;28622;32723	1.55E+00;1.16E+00;9.25E-01;5.59E-01
	Spink11	0.245008	1.11485	4	TCCAGAGAGTCTTAGAAAAG;AAACAGTAAGCACAGAGTGC;TTGGTACTTCTTCCTTATTT;GTCAGATTCACTCTTATACA	-0.07;0.14;0.45;0.46	46974;57975;70168;70503	7.88E-01;6.28E-01;4.88E-01;2.12E-01	9131;9466;21659;32659	1.55E+00;1.23E+00;1.18E+00;4.97E-01
	Aurkaip1	0.244972	1.11993	4	AGCATAGCTGCCAATCACCC;CTGGGTCCTCTTACCAGGGA;ATTGCCCAGACGGAATGTCG;AGTTCTACGAATGTCCACCT	-0.05;0.16;0.42;0.46	47765;58835;69256;70499	8.13E-01;6.51E-01;4.65E-01;2.12E-01	9135;10378;20799;31869	1.59E+00;1.28E+00;1.11E+00;4.97E-01
	Pip5kl1	0.244669	1.16748	4	CATGACCCAAGTTCACGAAG;GCTTCTTTGTGAAGACCCAA;GGACTCACCTCTCAGAAATG;TTTCAGGCGTATACAGTCTG	-0.94;0.3;0.58;1.04	7565;65019;73512;78550	8.71E-01;6.16E-01;5.50E-01;2.38E-02	1084;6122;14615;72069	1.69E+00;1.52E+00;1.28E+00;1.73E-01
	Tubb2a	0.244664	1.14965	4	CGGGCACCATGGACTCAGTG;GAGGTGATAAGCGATGAGCA;ACTCTGTCCTAGATGTGGTG;AACCTATTCCATTGACAATG	-0.72;0.34;0.61;0.74	14146;66709;74101;76140	9.55E-01;6.50E-01;4.03E-01;7.79E-02	3493;5533;12925;65488	1.84E+00;1.60E+00;8.14E-01;3.40E-01
	Hormad1	0.244657	1.04415	4	TGAAGGTGTGAAAAGGTGTT;ACCTGGTGGTTGGTAATCTG;TCCTGGATTGGTGTATACCT;TCTTGCATCACCTATTTGAG	-0.6;0.02;0.65;0.91	18805;51723;74702;77790	6.89E-01;5.07E-01;3.76E-01;4.07E-02	1844;4932;27911;60830	1.69E+00;1.06E+00;9.51E-01;4.68E-01
	Klhl33	0.244423	1.04371	4	TGGGCCCGGGCATTTCACTG;GGACAGCTTTATGCCCTAGG;TTCTCGAACAACTCCAGTGT;GTCTACCAGAGAGCTGCGAA	-0.05;-0.01;0.3;0.74	47738;50438;65165;76048	8.12E-01;4.90E-01;4.00E-01;8.00E-02	3586;14469;29196;31896	1.59E+00;9.04E-01;8.77E-01;8.04E-01
	Six1	0.244328	1.21037	4	GCCGAAAATTCCCGTTGCCG;GGGCCGCCGAGGCCAAGGAA;GCTGAAAGCGCACTACGTGG;TGCTTTAAGGAGAAGTCTCG	0.09;0.22;0.29;0.37	55700;61765;64813;67863	1.12E+00;7.41E-01;3.96E-01;2.78E-01	11771;14821;17869;23934	2.09E+00;1.46E+00;8.61E-01;4.37E-01
	Khdrbs1	0.244247	1.05425	4	AGACGGGGTCAGACGCACCG;TTCAGGTACTCCGTTCAAGT;TAGGAGGAAGAGTTGCGCAA;AGAGCATAAGCTTCACACGG	-0.07;0.09;0.27;0.69	47048;55480;63720;75379	7.91E-01;5.72E-01;3.88E-01;9.54E-02	4255;15915;24154;32591	1.55E+00;1.11E+00;8.14E-01;7.42E-01
	Xrcc6	0.244239	1.02664	4	TCCTGCCTAGTGACACCAAG;TTACAAGATTTGGACAACCC;GAAGACGTAGTACTCATGGT;CTCCGGGTACACGAACAGAG	-0.12;0.06;0.24;0.8	43879;54361;62562;76752	7.00E-01;5.50E-01;3.81E-01;6.40E-02	2882;17072;25273;35755	1.39E+00;1.06E+00;8.87E-01;7.69E-01
	Pdha2	0.24418	1.0911	4	GGACGTGATGACGTGATCCG;TACGGCAAGAACTTCTACGG;TTCTCACAGATGAAAACACA;CAAGTACTACCGGACCATGC	-0.37;0.34;0.38;0.62	29900;66721;68216;74237	9.56E-01;4.43E-01;4.37E-01;1.22E-01	5397;11418;12913;49734	1.85E+00;1.04E+00;8.18E-01;6.58E-01
	Adipoq	0.244	1.03325	4	ACGTCATCTTCGGCATGACT;AACCAACAGAATCATTATGA;CGCTGAGCGATACACATAAG;GGGGTTCCGGGGAAGCCCCG	-0.3;-0.11;-0.09;1.47	33561;44670;45915;79440	4.89E-01;4.86E-01;4.39E-01;4.22E-03	194;33719;34964;46074	2.01E+00;9.51E-01;7.21E-01;4.47E-01
	Cir1	0.243935	1.05889	4	ACAGTCTCCTCAGCTACCTG;GGCGCTCCGAGAGAAAAGTG;TGCCTACCTGAGCCATCAGT;GCTGCTATCTGATGTCTCCG	-0.31;0.29;0.32;0.68	33353;64615;65800;75149	8.52E-01;4.83E-01;4.07E-01;1.01E-01	4485;13834;15019;46281	1.66E+00;9.43E-01;9.08E-01;7.23E-01
	Zfp658	0.243769	1.21455	4	GCATCGCCGAATTCACAAGG;ACATTATCGGATACATACAG;CACTCACCTTGACACCAACA;CATTAGAAGAGTCTTGCGGG	0.15;0.15;0.28;0.39	58385;58650;64496;68453	1.25E+00;6.46E-01;3.94E-01;2.63E-01	11181;15138;20984;21249	2.30E+00;1.27E+00;8.47E-01;4.48E-01
	Fam118b	0.243736	1.01055	4	GGTCATGGGCGACATGGACG;ATCACCAGCACAAGTTCTCG;GGGGTCTACACCAATCCTAG;TTTCTCATCAGTAAGGTCAA	-0.68;0.09;0.32;1.24	15573;55638;65939;79162	5.75E-01;4.08E-01;3.90E-01;1.03E-02	472;13695;23996;64061	1.63E+00;1.12E+00;9.15E-01;3.78E-01
	Ccdc141	0.243653	0.995245	4	GGGATACATTCAGAACCGAG;TGGTACCTCAAAGCTATCGA;ATTTCGAAAGTCATCCGAGG;TCAGTGCTCTCAAACTCATG	-0.4;-0.27;0.39;1.25	28248;35582;68556;79165	4.50E-01;4.36E-01;4.19E-01;1.02E-02	469;11078;44052;51386	1.64E+00;1.07E+00;7.61E-01;5.19E-01
	Zfp661	0.243071	1.0181	4	GGTGTCGGATGAGGGACGAA;TGACTTTCACAGATGACGAG;AAATCCAAACACTAACAGGT;GGTGGCGAGTGAGGGATGAG	-0.55;0.22;0.32;0.99	20836;61693;65866;78260	7.38E-01;4.07E-01;3.75E-01;3.02E-02	1374;13768;17941;58798	1.45E+00;1.18E+00;9.11E-01;5.27E-01
	Fam71b	0.242919	1.07174	4	ACACAGTCACCATTCGGACG;AGTATCTGCCAAAGCAAGGG;GACGAGCCCGATTCATCAAG;AGGCTTATGACACCTGAAGT	-0.08;0.06;0.43;0.56	46038;54030;69775;73024	7.60E-01;5.44E-01;4.77E-01;1.51E-01	6610;9859;25604;33596	1.50E+00;1.15E+00;1.04E+00;5.92E-01
	Wdfy4	0.24277	1.02357	4	CACAGTGCTCAGCATCACGT;TGATCTTCGAGGTATAGACG;GCAGCAAAAGACAATGCATG;CGAAGCCACGCCCCTCATCG	-0.13;-0.12;0.43;0.79	43494;44192;69516;76708	6.90E-01;4.71E-01;4.37E-01;6.50E-02	2926;10118;35442;36140	1.37E+00;1.13E+00;8.82E-01;7.08E-01
	Ttc32	0.24274	1.07355	4	CCACTGCATATAACAACAGG;GGAGAAGCGAGCCTGCGCCG;GAAGTTCCCTATTATAACAG;GCCAGTGCGCGCGTCACGGG	-0.12;0.21;0.28;0.6	43939;61246;64327;73916	7.23E-01;7.02E-01;3.92E-01;1.29E-01	5718;15307;18388;35695	1.42E+00;1.39E+00;8.40E-01;6.39E-01
	Ptch2	0.242737	1.06609	4	TTCCCAGAAGCAGTCAAGCG;GAGGTGGCTCTAGTGACACA;TTTCAATGCTGCCACTACAC;TAGCCCTGGAGGGTCTACAC	-0.8;-0.3;0.54;1.53	11532;33908;72417;79479	5.64E-01;4.45E-01;4.41E-01;3.36E-03	155;7217;45727;68102	2.11E+00;1.39E+00;4.92E-01;2.72E-01
	Stap2	0.242656	1.0656	4	AACAGATGGCTAAACCCTGG;TTCTAAGTATGTGATCGACG;GGAGAATGGCGAGAGTGCAT;TGACCAAAGAGGAGGTACGG	-0.11;0.06;0.45;0.57	44629;53960;70291;73219	7.20E-01;5.43E-01;4.91E-01;1.46E-01	6415;9343;25674;35005	1.43E+00;1.19E+00;1.04E+00;6.01E-01
	Cep128	0.242478	1.11247	4	CAACTTCACACTCTCCAACG;TGAAGGACTACGACCTACAG;CCTGCGAGGCCAATCGTAAG;AGGAATTGGAGATCTCACGC	-0.04;0.18;0.34;0.49	48406;59922;66807;71315	8.34E-01;6.82E-01;4.20E-01;1.92E-01	8319;12827;19712;31228	1.63E+00;1.34E+00;9.60E-01;5.23E-01
	Lypd8	0.242323	0.98299	4	GGGCCCTGTACAAACCAGAG;ACAATGTGTCTTCATCATTG;TCACAACAAAACACTCTGCG;GTTCTCGGTGCAATTCGATG	-0.43;0.08;0.36;0.96	26509;55113;67431;78108	5.65E-01;4.29E-01;4.03E-01;3.36E-02	1526;12203;24521;53124	1.14E+00;1.09E+00;9.96E-01;7.03E-01
	Vpreb2	0.242296	1.1061	5	CCAAGGGAAGAAGATGCTGA;CAAGAGTTCCCTTACCTGTG;TCACACTCAGACAAGCACCA;AATGTTATGGTCGTTGCTCA;CTTCTCCGGGTCCAAAGATA	-0.62;0.05;0.25;0.54;1.0	17889;53455;63023;72409;78338	7.96E-01;6.66E-01;5.09E-01;3.92E-01;3.56E-02	1297;7226;16612;26179;61745	1.41E+00;1.25E+00;1.21E+00;1.12E+00;5.52E-01
	NO_CURRENT_184	0.242055	1.25234	4	GCGGTTACCGCGAAAACCAT;GCGTACGGGGCCGAAGACTG;GCGTACCTATCGATAAACCA;GCGTATCTACCCTACCGCCG	-1.03;0.31;0.79;0.9	5898;65527;76630;77658	8.95E-01;8.72E-01;6.29E-01;4.36E-02	1976;3004;14108;73736	2.10E+00;1.74E+00;1.04E+00;1.34E-01
	Tox3	0.241953	1.11114	4	GAAAATCGTAGCATCTATGT;GGTACTGTGACACTTGTGTG;ATTCCACACGCCAAGCCTTG;ACACATCACTGTCTCAACAT	0.02;0.15;0.2;0.6	52037;58549;60890;73748	9.63E-01;6.43E-01;3.76E-01;1.33E-01	5886;18744;21085;27597	1.84E+00;1.26E+00;7.11E-01;6.29E-01
	Rpl13	0.241948	1.00006	4	CACTGTAGGGCACCTCACGA;GGAACAGGATGAGCTTGGAG;TACCTGCGGATCTTGCGCGC;GGCTGGCATCCACAAGAAAG	-0.58;-0.32;0.09;1.78	19677;32402;55411;79566	4.57E-01;3.87E-01;3.75E-01;1.46E-03	68;24223;47238;59955	2.47E+00;5.71E-01;4.93E-01;4.69E-01
	Olfr738	0.241647	1.02482	4	GGAGGATTTGCCCCTCCTTG;AATTAAAGAATTTCTCACAC;AGATGACCTTCGTGTCAGAG;ATAATGTAGAGGTCTGCAGA	-0.42;0.25;0.32;0.82	27334;62997;65923;76951	7.85E-01;4.10E-01;4.08E-01;5.95E-02	2683;13711;16637;52300	1.54E+00;9.15E-01;9.14E-01;7.30E-01
	Pla2g7	0.2416	1.0132	4	TAGTGGCCACTGTCGAACAC;TTGGGATCCAAACAGTGTCG;GGAAATGGATCGTACCCCGT;GCGATTCTTGACATTGAACA	-0.32;-0.31;0.48;1.11	32729;33323;70939;78826	5.10E-01;4.74E-01;4.49E-01;1.77E-02	808;8696;46311;46905	1.40E+00;1.25E+00;9.20E-01;4.83E-01
	Dnajc27	0.241418	1.12747	4	TAAAACTCATTTCGGACCTG;GACTCCATAGTCAATCCCGA;GGTACTCACTTTCCCCACTT;ATGTTGTCCATGTTCCCGTG	-0.25;0.35;0.39;0.47	36756;66988;68444;70798	9.70E-01;5.40E-01;4.48E-01;2.04E-01	8836;11190;12646;42879	1.87E+00;1.08E+00;1.06E+00;5.06E-01
	Bub1b	0.240826	1.07457	4	GAACAGAACTACCCTCAAGG;AATTATTGAAGAGAGCCGTG;AGATAACTCCGTTCTAGACG;GGAACTCCCGACATTTCCTG	-0.7;0.32;0.36;0.98	15014;65881;67476;78209	9.12E-01;4.30E-01;3.95E-01;3.13E-02	1425;12158;13753;64620	1.77E+00;1.17E+00;9.98E-01;3.63E-01
	1190002N15Rik	0.240805	1.03891	4	AGACGCGCGAACTCGGTGCG;TCTCCATTAACTGCCAAGCA;GCGCCGCTACGCGGAGACCA;AGTACACGTTCTTCACGTTG	-0.3;-0.09;0.64;0.7	33895;45815;74618;75571	6.83E-01;4.91E-01;4.46E-01;9.10E-02	4063;5016;33807;45741	1.68E+00;9.63E-01;7.58E-01;7.54E-01
	Eno4	0.240678	1.00575	4	TCCACGACTTCAAAGTGCGT;GATCAATCAGTCCATCACAG;GGTTAAGTAGAGAGGATCGC;GCTCTCCTCTCTAGGACGGA	-0.27;-0.16;0.03;1.37	35172;41824;52455;79346	5.12E-01;4.28E-01;4.09E-01;6.27E-03	288;27179;37812;44462	1.84E+00;1.01E+00;6.48E-01;5.18E-01
	Oit3	0.24064	1.14523	4	TTGCGACAACCATATGAACG;CAGGGAACCTACGTCAACCA;GATACACGTAGTAGCCTCTG;GAAGGTTGTCACAACAACAA	-0.33;0.39;0.45;0.46	32032;68418;70088;70392	1.06E+00;4.86E-01;4.64E-01;2.14E-01	9242;9546;11216;47602	2.02E+00;1.18E+00;8.94E-01;4.94E-01
	Zfp423	0.24055	1.07359	4	CGGGGAAGACACCTCGACGT;CACATTCGAGTCTCGCACTG;AGTCCCGCTTAGAACAATAG;CTTCTGTAGGTCATCCACCG	-0.04;0.04;0.38;0.58	48768;52934;68163;73369	8.46E-01;5.26E-01;4.42E-01;1.42E-01	6265;11471;26700;30866	1.65E+00;1.04E+00;9.99E-01;6.09E-01
	Naaladl1	0.240415	1.05585	4	ATCGCTCTGACTCGCTACGG;AGTGGAAGGTTGTTCCATTG;TGGCTCTACAGAATTTACAG;GGAAATCCTGAGGTGTTGTG	-0.2;-0.08;0.62;0.62	39546;46311;74138;74209	6.52E-01;5.96E-01;4.49E-01;1.23E-01	5425;5496;33323;40088	1.61E+00;1.19E+00;7.68E-01;6.57E-01
	Eno2	0.240346	1.26656	4	AAACAGCGTTACTTAGGCAA;GGTGTACCACACCCTCAAGG;GCCATCGCGGTAAAACTCAG;TCCTTCCCGATACATCACTG	-0.87;0.53;0.6;0.7	9451;72250;73739;75568	1.37E+00;6.29E-01;4.88E-01;9.10E-02	4066;5895;7384;70183	2.54E+00;1.55E+00;7.58E-01;2.19E-01
	Fam69c	0.240134	1.013	4	TGTGGCTAATAGCCTGTGCT;ACAACAGCATAGCCCCGCTA;TCTGAGCCGCCACATCCTAC;TGAGAACTTCGCCATCAAGA	-0.37;0.21;0.33;0.79	29842;61117;66442;76712	7.19E-01;4.36E-01;4.15E-01;6.49E-02	2922;13192;18517;49792	1.41E+00;9.41E-01;8.82E-01;8.16E-01
	P3h1	0.239951	1.03042	4	GCTTTACGCAGAGGGGACCG;GAAGCGCAGGTCGTGCAGGG;GGGGGTACGACTCTACTCAG;GTGAGCCGACTGACGCGGGA	-0.06;-0.02;0.25;0.78	47626;49759;63241;76570	8.09E-01;4.82E-01;3.85E-01;6.81E-02	3064;16393;29875;32008	1.58E+00;8.80E-01;8.64E-01;7.95E-01
	Plaur	0.239908	1.1439	4	AGGACCATGAGTTACCGCAT;TGCAACTACACCCACTGCAA;AGGTGCAGGACGCACACTCG;AAGGATGAGGACTACACCCG	0.07;0.09;0.33;0.47	54764;55668;66324;70645	1.08E+00;5.76E-01;4.13E-01;2.08E-01	8989;13310;23966;24870	2.02E+00;1.12E+00;9.35E-01;5.01E-01
	Prpf4b	0.239794	0.987129	4	TGATGTAAAAGAATATGAGC;AGAAGGTCTCGATCACGGGG;CTACCAAGGATATCATCTCG;CAAACGGAAAGAAGTTATCG	-0.33;-0.18;0.47;0.99	32146;40575;70821;78300	5.07E-01;4.65E-01;4.26E-01;2.93E-02	1334;8813;39059;47488	1.24E+00;1.20E+00;8.98E-01;6.19E-01
	Anxa7	0.239646	0.983746	4	GATCTCAAGTCAGAATTGAG;TTACGGAAGGCAATGCAGGT;ATTTGGACGAGACCTTGAGA;GGTCAGTACCCGTACCCTAG	-0.41;-0.25;0.16;1.46	27677;36361;58970;79436	4.33E-01;4.13E-01;3.75E-01;4.30E-03	198;20664;43273;51957	2.01E+00;7.42E-01;6.55E-01;5.33E-01
	Clstn3	0.239464	1.06046	4	ACCGAGACAACTATTCAGAG;AGTAGTGGTGGATCAGCAAG;CAGTTACCTGCATAGCGCAG;CAGACGCTCCACAAAGACCG	-0.14;0.21;0.23;0.65	43057;61517;62418;74675	7.32E-01;6.79E-01;3.80E-01;1.12E-01	4959;17216;18117;36577	1.44E+00;1.35E+00;7.64E-01;6.87E-01
	Klk6	0.239148	1.04337	4	GCACCCACTGTGGGTCAATG;ATTTAGCAAGAACCAAGCAC;TCTTGGGGAAACACAACCTA;GGGTGGGAGTCCTTCAAACA	-0.27;-0.16;0.66;0.73	35346;41529;74839;75973	6.99E-01;5.15E-01;4.28E-01;8.17E-02	3661;4795;38105;44288	1.72E+00;1.02E+00;7.97E-01;6.41E-01
	Alms1	0.239146	1.02336	4	TATTTCACGATCTACATGTG;CTTTCAGTTAGATCACGATG;ACGAACCTTAAGTACCAGAG;GATGACATCAAAATTAGCAA	-0.36;0.25;0.27;0.79	30646;63106;64100;76633	7.90E-01;4.46E-01;3.90E-01;6.67E-02	3001;15534;16528;48988	1.55E+00;8.72E-01;8.44E-01;8.30E-01
	Cycs	0.238879	0.988006	4	GTTCGGGCGGAAGACAGGCC;CTGGGGAGAGGATACCCTGA;TTCTGTTTAGGCATCACCTG;TCTTCCGCCCGAACAGACCG	-0.17;-0.11;0.29;0.95	41079;44686;64653;78013	6.30E-01;4.39E-01;3.95E-01;3.57E-02	1621;14981;34948;38554	1.26E+00;1.12E+00;8.54E-01;7.22E-01
	Ociad2	0.238781	1.06737	4	ATAAGCATGCTTGTCACCCA;TCAAAACTGCACATCCACAG;TTGATTTGGGGCAAAACAAC;GCTTATAAGAGAAAAAGGCA	-0.87;-0.14;0.57;1.39	9391;42921;73195;79379	6.00E-01;4.90E-01;4.31E-01;5.55E-03	255;6439;36713;70243	1.90E+00;1.48E+00;6.75E-01;2.18E-01
	Il1f5	0.238759	1.17324	4	TGTTGTCCCAAATCGGGCAC;GTCATCCTGGGCGTTCAAGG;AACATCATGGAGCTCTACCT;AGGGCCAATTCTGAAACTTG	0.11;0.14;0.28;0.43	56599;57956;64156;69661	1.16E+00;6.28E-01;3.91E-01;2.32E-01	9973;15478;21678;23035	2.15E+00;1.23E+00;8.32E-01;4.75E-01
	Stard3	0.238719	1.14208	4	CTGGCCCTCAGACAAAGCAC;GAAGAAAAGTTTCTCTGCCC;ATGGCCCTACGCTTCTCCAG;GTCTTAGTTGCTCAGCAAAG	0.03;0.19;0.28;0.46	52320;60527;64263;70452	9.75E-01;7.00E-01;3.92E-01;2.13E-01	9182;15371;19107;27314	1.86E+00;1.38E+00;8.37E-01;4.96E-01
	En2	0.238665	1.02886	4	GGACGCGGGGACTTGCTGTG;AAGACGCTATCACTTCACGG;GCGCGTGCAGTAGACCCAAG;GTCGACCGCAGGGTCGCCAG	-0.17;0.13;0.33;0.66	41280;57526;66239;74949	6.35E-01;6.17E-01;4.12E-01;1.05E-01	4685;13395;22108;38354	1.27E+00;1.21E+00;9.30E-01;7.07E-01
	Scgb1b2	0.23856	1.0563	4	AGAAGAGTATGTTAATTATG;TGGTGCTCTGGTGATCCTCG;CCTGCTCCTCCTAACTTCAG;ATAATTAACATACTCTTCTG	-0.57;0.32;0.38;0.83	20138;65773;67969;77065	9.07E-01;4.39E-01;3.75E-01;5.69E-02	2569;11665;13861;59496	1.76E+00;1.03E+00;9.32E-01;5.06E-01
	Atf6b	0.23845	1.01577	4	GATCTGGACCGTTTCAAAGG;ATTACCTGAGGAACTATCAG;GATGATCAAGAATCGAGAGT;ATGGGTAGAGGGTCCCAAGG	-0.1;0.0;0.27;0.78	44948;51101;63957;76599	7.29E-01;4.99E-01;3.89E-01;6.75E-02	3035;15677;28533;34686	1.44E+00;9.28E-01;8.67E-01;8.24E-01
	Ccl28	0.238371	1.09627	4	AGGGCTCACACTCATGGCTG;GCTTCAAAGTACGATTGTGC;CAGCATCCAGAGAGCTGACG;GGCCTCCAGCTGTTGCACTG	-0.53;0.34;0.51;0.63	21903;66556;71786;74452	9.47E-01;5.39E-01;3.78E-01;1.17E-01	5182;7849;13078;57731	1.83E+00;1.32E+00;6.72E-01;5.59E-01
	Coq6	0.238272	1.08292	4	AGACACCGTGTACGACGTGG;GGCCTTGATAATGTTCGACA;CTAGGGTAATATGGACCCAA;GTGTGATGTGGACCAGACCA	-0.12;0.18;0.38;0.51	44159;60054;68202;71698	7.08E-01;6.86E-01;4.43E-01;1.82E-01	7936;11432;19580;35475	1.40E+00;1.35E+00;1.04E+00;5.36E-01
	Nr4a3	0.238265	0.964045	4	CGGCCGTGGGGTCATAGCCG;ACCAAGCTGACCATGGACCT;GCATTCATCATACAGATCGG;AGTGTCGGGATGGTTAAGGA	-0.34;-0.05;0.31;1.03	31761;47865;65626;78482	4.62E-01;4.60E-01;4.05E-01;2.53E-02	1152;14008;31769;47874	1.26E+00;8.99E-01;8.84E-01;8.16E-01
	Tmprss15	0.237316	1.04104	4	CATATGTGTGGTCAAAACGT;AACATGGAGACCAGACGCAA;GCCTTGGATAACGATCAGCT;GCTGGCACTCTATTGAGACA	-0.21;-0.21;0.62;0.76	38473;38643;74133;76330	6.52E-01;5.74E-01;4.27E-01;7.36E-02	3304;5501;40992;41162	1.61E+00;1.15E+00;8.35E-01;5.77E-01
	Carm1	0.237281	1.04998	4	TGAGTACTTCCGGCAACCTG;CAATCTGACAGACCGCATCG;CTCACTATCGGCGACGCGAA;GGTTCTGCAGGATCGCACGC	-0.23;0.24;0.32;0.62	37515;62795;65962;74135	7.78E-01;5.55E-01;4.09E-01;1.24E-01	5499;13672;16839;42119	1.53E+00;1.11E+00;9.16E-01;6.52E-01
	Slc52a2	0.237183	0.998347	4	ATGGGAGACACCTCGATCGG;AAGACCGTAAAAAGGGGGGT;TGTTGTGGGTTCAGATGTCG;GGCCTCTCTGTGGAACCACG	-0.72;0.02;0.31;1.35	14000;51955;65318;79324	5.11E-01;4.05E-01;4.01E-01;6.75E-03	310;14316;27679;65634	1.81E+00;9.60E-01;8.85E-01;3.36E-01
	Ints2	0.237102	1.02045	4	CACAAGCCGCAATCGACGAG;CCCGAGTACACCGACACGGT;GCTTCCTATAGTGGACGTCG;TCAGGGTTAGACTTAGACGC	-0.53;0.13;0.55;0.8	21655;57701;72675;76803	6.22E-01;5.76E-01;3.77E-01;6.29E-02	2831;6959;21933;57979	1.42E+00;1.22E+00;8.94E-01;5.51E-01
	Olfr952	0.237038	1.19085	6	TGTTGCAAAATGTCACATGT;AATAGACAGATAGGAAGATA;GTAGCTGTGGTATATGGTAT;TACAGAAAAACAATCTTAGC;CTGTTTGTTGATGGTAGCTG;GAGCTATGCATTCTGGGTAC	-0.39;-0.07;0.15;0.37;0.49;0.88	28632;46695;58455;67813;71281;77493	8.27E-01;8.21E-01;7.60E-01;6.34E-01;4.42E-01;7.10E-02	2141;8353;11821;21179;32939;51002	1.39E+00;1.39E+00;1.37E+00;1.16E+00;9.75E-01;8.51E-01
	Slc25a24	0.236846	1.14403	4	AAGAAGTTGCTTACCGAGGA;ATGAGAAAAAATCAGGACAG;ATCTTTGTTGACATCGCCAG;AGAGACTGGACAATTTCAGA	0.09;0.12;0.23;0.5	55828;57085;62358;71542	1.13E+00;6.07E-01;3.80E-01;1.86E-01	8092;17276;22552;23806	2.10E+00;1.19E+00;7.62E-01;5.31E-01
	Olfr141	0.23678	1.09967	4	CAGGAAATAGCAAGAAGAGG;AAAGCCTACTAGCATATTTG;ATAAGTGGTATATAGACTCG;GGTCATGAATGGCTACATAT	0.05;0.06;0.27;0.57	53474;53841;64014;73227	1.02E+00;5.41E-01;3.90E-01;1.46E-01	6406;15620;25793;26159	1.93E+00;1.04E+00;8.26E-01;6.02E-01
	Olfr1466	0.236724	1.04555	4	TGTATTTCCAAGATAAACTG;TCTCATCTACATCATTACCC;ATGGTGGTAGCATAGTATAG;AGAGTAAATAACATCCACCA	-0.02;-0.01;0.27;0.71	49859;50132;63780;75632	8.83E-01;4.86E-01;3.88E-01;8.96E-02	4002;15854;29502;29775	1.71E+00;8.93E-01;8.17E-01;7.64E-01
	Ttbk1	0.236712	1.37076	4	AAGGCCATTCACCTCGAACG;GCGGTCTCTATGCTACCGGA;GTTCTTGTGAGCATTGACCG;GTGTGCATACCACGTCCACG	-1.39;0.27;0.81;1.25	1576;63997;76932;79174	1.13E+00;9.12E-01;8.26E-01;1.00E-02	460;2702;15637;78058	2.19E+00;1.64E+00;1.61E+00;3.47E-02
	Scel	0.236683	0.988658	4	CTTCTCCTAAACCATTGGGG;AGACGGAAATTATGGCAGGG;AGTTATCAGAACACATGCCA;CCATATATTTAAAGAAACCA	-0.64;-0.1;0.43;1.25	17144;45426;69569;79186	4.72E-01;4.43E-01;3.81E-01;9.78E-03	448;10065;34209;62490	1.66E+00;1.14E+00;7.43E-01;4.21E-01
	Rnf31	0.236639	1.02009	4	GGAGGAACCAAGGTGTTGTG;CTACCTCAACACCCTATCCA;GAACTATGAGTTGTTGGACG;GATGGATTGAGTTTCCCCGA	-0.29;-0.22;0.6;0.86	34463;37979;73811;77313	6.33E-01;5.00E-01;4.28E-01;5.14E-02	2321;5823;41656;45171	1.56E+00;9.85E-01;9.72E-01;5.64E-01
	Dcaf4	0.236545	1.03051	4	GAGGGTCCTCTTGACCAATG;GGAGTCCAAGTGATTGAGTG;GTGAATGACGTCAAAATCGG;CAACTGCAACCCCCTCACAA	-0.22;0.04;0.52;0.61	38281;52870;71954;74033	5.70E-01;5.46E-01;5.25E-01;1.27E-01	5601;7680;26764;41353	1.34E+00;1.14E+00;9.96E-01;6.46E-01
	Adam34	0.236516	1.00765	4	ATGGAAGTTCATGTACATGT;GAGATGTGGGTTATCAGAGG;AACCTGATGCCAACCATGTG;TGTTATTTCTATGAACATAG	-0.2;0.13;0.28;0.74	39334;57421;64350;76037	6.15E-01;5.92E-01;3.92E-01;8.03E-02	3597;15284;22213;40300	1.20E+00;1.18E+00;8.41E-01;8.03E-01
	Slc11a1	0.236472	1.19995	4	GGGTGTGCTACCACATACTG;CCTAGCATGATACCGTCCAG;GAATGGGGATCTTCTCACTC;GAGAAGTAGACAGAACCCGC	0.1;0.17;0.33;0.34	56273;59556;66231;66855	1.15E+00;6.71E-01;4.12E-01;3.04E-01	12779;13403;20078;23362	2.13E+00;1.32E+00;9.30E-01;4.20E-01
	Uqcrh	0.236345	1.0621	4	GACGAACGAAAGATGCTCAC;AATCCTCTTCTGTCTGTGAC;TGGATCTGGAGACCCCAAAG;GCTCTCTCACTGTTGTTAGG	-0.81;0.15;0.54;1.07	10956;58377;72576;78669	6.39E-01;5.71E-01;4.52E-01;2.12E-02	965;7058;21257;68678	1.41E+00;1.33E+00;1.25E+00;2.57E-01
	Bsg	0.236312	1.02298	4	CAAACCACCACTGGATCTCG;GAAATCAGAGCATTCCAGTG;GGACGCAGATGACCGCTCTG;CCACCTTACTCGGCCACCCA	-0.51;0.26;0.35;0.84	22613;63530;67093;77223	8.06E-01;4.24E-01;3.80E-01;5.34E-02	2411;12541;16104;57021	1.58E+00;9.76E-01;9.57E-01;5.80E-01
	Hsd17b12	0.236255	1.0605	4	TGTTTGCAGTTAGCAAAACG;AGATTGTCAACAATGGAACT;TCTTATTTCAGTGAACAACG;AAAAATTCAACGTTGAAACA	-0.52;0.18;0.62;0.66	22435;59956;74269;74838	6.83E-01;6.60E-01;3.79E-01;1.08E-01	4796;5365;19678;57199	1.63E+00;1.34E+00;6.99E-01;5.75E-01
	Nfe2l2	0.236072	1.09417	4	GGTGGGATTTGAGTCTAAGG;GTTCTGTTTGACACTTCCAG;TGAAGACTGAACTTTCAGCG;TTCAACCCGAAGCACGCTGA	-0.21;0.31;0.34;0.5	38674;65376;66845;71652	8.87E-01;5.78E-01;4.20E-01;1.83E-01	7982;12789;14258;40960	1.72E+00;1.15E+00;9.62E-01;5.35E-01
	Fas	0.236	1.03858	4	CATTTGCATACTCACACGAC;CAGTTAAGAGTTCATACTCA;GAGGACTGCAAAATGAATGG;TATTTATATATCGAAAGTAC	-0.22;-0.21;-0.07;1.45	38317;38593;46638;79427	5.71E-01;4.78E-01;4.27E-01;4.50E-03	207;32996;41041;41317	1.99E+00;1.14E+00;5.76E-01;4.52E-01
	Mmab	0.235852	1.05528	4	TGTCCCCGTTTCCAGAGCCG;ATCAAGTATTTGAAGCCGTG;GAAGCTCTTCGGCAAACATG;CAGTGCATGCTACAGGACGT	-0.51;0.29;0.46;0.71	22502;64843;70396;75630	8.63E-01;4.94E-01;3.79E-01;8.96E-02	4004;9238;14791;57132	1.68E+00;1.20E+00;7.64E-01;5.77E-01
	Tmem50b	0.235599	0.974419	4	AACCACGCTTTCCACACGTG;ATAGCTGTCACCTCGCACCT;CTGGTGGATAATGATTGACG;CAGTCAATACACTCACACTC	-0.3;0.07;0.19;0.98	33744;54473;60687;78218	5.52E-01;4.89E-01;3.75E-01;3.11E-02	1416;18947;25161;45893	1.17E+00;1.06E+00;9.57E-01;7.05E-01
	Sdf2l1	0.235551	0.99627	4	AGCGCCGGGCTAGTGACCTG;CCAACAGTCGGTAACCGGCG;AGTTACTGGCGGATTCGCGG;GGTTGTTGGATAGCGGCGAC	-0.24;0.11;0.31;0.76	37174;56579;65580;76321	5.95E-01;5.48E-01;4.04E-01;7.38E-02	3313;14054;23056;42460	1.16E+00;1.09E+00;8.97E-01;8.34E-01
	Nudt9	0.235448	1.04582	4	CAACCCAGTGGAGTACACCG;CCGGACAGTCACTGACGCGA;ATTAGAACCAGACATGATGT;GCCCGGACTTCTCCTTACCC	-0.13;-0.04;0.53;0.59	43212;48471;72192;73624	6.83E-01;5.55E-01;4.68E-01;1.36E-01	6010;7442;31160;36422	1.37E+00;1.36E+00;8.36E-01;6.22E-01
	Actr2	0.235314	1.08305	4	AAGTGAGCTGCGTTCCATGT;GGAGGCTGGATATTGCTGGG;GGATGACATGAAGCACCTGT;GATGGACGTATCATTAAGGT	-0.23;0.28;0.38;0.5	37870;64272;68222;71591	8.37E-01;5.62E-01;4.43E-01;1.85E-01	8043;11412;15362;41764	1.64E+00;1.12E+00;1.04E+00;5.32E-01
	Prps1l1	0.234942	1.07642	4	AGGAGAATATTTCTGACTGG;GATGTCTACATCGTTCAGAG;CAAGAGGGTCACTTCCATCG;GGGCCTCGAGCTCAGCAAGG	-0.02;0.13;0.25;0.58	49569;57529;63206;73410	8.73E-01;6.18E-01;3.84E-01;1.41E-01	6224;16428;22105;30065	1.69E+00;1.21E+00;7.94E-01;6.11E-01
	Cds1	0.234805	1.03764	4	CCTTGAAGATAGTCCGGACA;GGTCGTAGGAGTGGTAGACC;TGACGCTTGATATGGGAACA;CTCCTCCCTCTGAACAAACG	-0.14;0.0;0.48;0.6	42733;51045;71118;73703	6.70E-01;5.16E-01;4.98E-01;1.34E-01	5932;8516;28589;36901	1.34E+00;1.26E+00;9.26E-01;6.27E-01
	Pcdha10	0.234594	1.08037	4	AACAGCTGACTATAAAGTGG;AAATGCAAGAAATGGTACCG;TTCAAGAGGACGCTCCAGTG;GCGCCCTCTAGTGAAAAATG	-0.51;0.31;0.52;0.62	22827;65356;72141;74120	8.86E-01;5.53E-01;3.81E-01;1.25E-01	5514;7493;14278;56807	1.72E+00;1.36E+00;6.51E-01;5.87E-01
	Txndc16	0.23446	0.985284	4	GTTGTCTGTGGAGCTAACAG;AAATACGTGAATATTGAGTG;AGAAGCGTCAAGGTACTGTG;AAATGTTACTGCATTTCCCG	-0.46;-0.24;0.47;1.17	24853;37247;70852;78994	5.08E-01;4.30E-01;3.91E-01;1.40E-02	640;8782;42386;54781	1.50E+00;1.24E+00;6.50E-01;5.50E-01
	Cdc16	0.234272	1.02553	4	GTGGAGCTGAATAAAGCGAA;CACAGCGAAGGAATGCCCGT;GGCTACCTACAGTTACAAAG;TTACGTGGCATCTAGCTGCA	-0.9;-0.03;0.3;1.56	8489;49377;65193;79496	5.17E-01;4.78E-01;4.00E-01;2.99E-03	138;14441;30257;71147	2.16E+00;8.79E-01;8.66E-01;1.96E-01
	Olfr401	0.234229	1.11504	4	TGTGGATGTCGCCACAGTGT;ATTCGGGTGCTATAGGTGAG;TGTGTGAGACAAGCTCCATA;CTGTGGTCATGTAAGCCAAG	-0.22;0.31;0.41;0.43	38112;65653;69172;69607	9.01E-01;5.66E-01;4.63E-01;2.34E-01	10027;10462;13981;41522	1.75E+00;1.13E+00;1.11E+00;4.73E-01
	Rasgrp3	0.233947	1.07138	4	CCACTGGCATTCCGATACGT;AACGACACCTAATAAGCCTG;ACACGCTAGATATGTCCATG;AACTACGATCATGACCACGA	-0.38;0.27;0.5;0.54	29488;63928;71578;72527	8.23E-01;5.32E-01;4.32E-01;1.62E-01	7107;8056;15706;50146	1.61E+00;1.30E+00;8.03E-01;5.69E-01
	Itgb8	0.233899	0.973824	4	ATTTCAGAACACAATAGATG;ATGAAAACATGTGATATCAT;CCAGATAATAAAGATCCACG;ACATGAATGTATCCATGGGG	-0.41;0.06;0.41;0.87	27970;54257;68996;77440	5.48E-01;4.59E-01;4.16E-01;4.85E-02	2194;10638;25377;51663	1.09E+00;1.05E+00;9.94E-01;7.52E-01
	Nat8f4	0.233492	0.959882	4	GAGGTAGTGTCAGCATATGG;GGTCCTGGAATTGTTCTCCA;AAAGAGAAAGCTGCATACTG;GCTTTCTTGGAGAAATTACG	-0.33;-0.02;0.35;0.93	32138;49539;67043;77933	4.79E-01;4.65E-01;4.23E-01;3.75E-02	1701;12591;30095;47496	1.10E+00;9.73E-01;8.98E-01;8.72E-01
	Sp2	0.233453	1.09164	4	ACTGTCTGTACCTCACCAGA;GTGAACACCAGCGATATTGG;CTTATGACCAGATGTTGACG;GTCACAGCCATCCGTAGCTG	-0.04;0.1;0.41;0.46	48455;56251;68964;70580	8.35E-01;5.88E-01;4.58E-01;2.10E-01	9055;10670;23383;31179	1.63E+00;1.15E+00;1.09E+00;4.99E-01
	Lrrc23	0.233301	0.998521	4	ACTCCGAAGCTGATTGCCAT;TCACGCTTATATTAAGCTGG;GATCCAGGCTTCCCAGACGG;GCAGGCTCGACAGTCTCTCG	-0.14;-0.04;0.35;0.77	42773;48575;66962;76437	6.71E-01;4.69E-01;4.22E-01;7.12E-02	3197;12672;31058;36861	1.34E+00;9.69E-01;8.48E-01;8.39E-01
	Esco1	0.233221	1.06193	4	TCTCTAAAAAGAATGAACTG;AATTGAATCAGATACTGTAG;AATCAAGTCTGATTGTAAGG;AGTTAACAGAGTGTACAACC	-0.16;0.17;0.41;0.51	41613;59547;69161;71768	6.71E-01;6.43E-01;4.63E-01;1.81E-01	7866;10473;20087;38032	1.32E+00;1.28E+00;1.11E+00;5.39E-01
	Lcn10	0.233165	1.06754	4	TCACGGGTATTCCTGAACAC;CAAAACAGGCCAGCTCAGGG;CCTATCCATAGCTCTAGCCC;TCCTCTTGTCTCTAGCCGGT	-0.87;-0.06;0.63;1.23	9476;47191;74369;79141	6.67E-01;4.87E-01;4.56E-01;1.08E-02	493;5265;32443;70158	1.64E+00;1.61E+00;7.95E-01;2.20E-01
	Olfr1301	0.233093	0.999487	4	TCTCTACTGCACCAACACAA;TGAGCCTGAAAAGATGTGCT;ATTTATATGAATGTCGACTG;TGTGATCATCTTAGGAGTGG	-0.24;-0.09;0.0;1.26	37072;45765;51050;79190	5.46E-01;4.46E-01;4.22E-01;9.69E-03	444;28583;33869;42554	1.66E+00;1.09E+00;7.52E-01;4.98E-01
	Itgb2l	0.232978	1.01166	4	ATAGTTCCATCATGTGCTCG;CATCCCCAAGCTGACCATTG;TCATGGATTCAGTGACCGTG;AAATCCAGGCAAACCCAGCG	-0.15;0.07;0.08;0.93	42425;54641;55132;77899	6.63E-01;5.56E-01;3.89E-01;3.82E-02	1735;24502;24993;37209	1.32E+00;1.09E+00;1.07E+00;5.65E-01
	Slc9a9	0.23287	0.987764	4	CACTTACCCTATGACCACAC;ATCCGATGACAGATTGTTGT;GAGTGTACTGAATGATGCGG;TGTTGACTAGTAGAGTTGAT	-0.15;-0.01;0.23;0.86	42363;50226;62380;77324	6.61E-01;4.87E-01;3.80E-01;5.11E-02	2310;17254;29408;37271	1.32E+00;9.74E-01;8.96E-01;7.62E-01
	Olig1	0.232824	1.00573	4	AGTGCGCTGCCGAGTAGGGT;CGGCTCCCGCGACCATGTTG;GGTCCCCGAGGTTCAGCGAG;GCAAGATCAACAGCCGCGAG	-0.36;-0.29;0.54;1.04	30618;34019;72539;78554	5.70E-01;4.45E-01;4.45E-01;2.37E-02	1080;7095;45615;49016	1.40E+00;1.28E+00;8.43E-01;4.93E-01
	Washc4	0.232461	1.0718	4	TGTGACGAGGTGCTACGAAG;CAAAGTCATCACTGTTTATG;GGACATGTAGAGATTCATTG;GCTGTGTAAGGAGATCGAGA	-0.45;0.36;0.38;0.65	25443;67269;68035;74693	9.86E-01;4.40E-01;3.95E-01;1.11E-01	4941;11600;12365;54191	1.90E+00;1.03E+00;6.89E-01;6.69E-01
	Pax8	0.232342	1.00938	4	GCACTGTTGAGTAAGGGCAG;GACTCACCAGACCTACCCTG;AGAAGATAGGAGACTACAAG;GAGCCCAAGGAATCCGACTG	-0.29;0.05;0.52;0.65	33968;53575;72058;74769	5.50E-01;5.36E-01;4.92E-01;1.09E-01	4865;7577;26059;45666	1.35E+00;1.03E+00;9.66E-01;6.94E-01
	Zfp691	0.232295	1.06534	4	AGGATTCTCAGATCACACCT;CCAACCTGAGAACGCACCAG;CCGGTGATGTACAGCCAGCG;CAGGTGATCTTGCTGGTGCG	-0.73;0.02;0.72;0.93	13681;51897;75753;77890	7.75E-01;5.10E-01;4.08E-01;3.84E-02	1744;3881;27738;65953	1.89E+00;1.09E+00;9.58E-01;3.27E-01
	Stoml1	0.232228	1.14663	4	CAGCCATCACGGATAGCACT;TCATACTTCCCCCTAGCAAG;AAGCCTCTCACCTTGCAAGG;AGGATGATTGTGTTTCGACT	0.07;0.16;0.25;0.45	54883;58982;62884;70199	1.08E+00;6.55E-01;3.83E-01;2.19E-01	9435;16750;20652;24751	2.03E+00;1.29E+00;7.81E-01;4.89E-01
	Ybx3	0.23214	1.14852	4	CACTGCGCAGATACTTGCGT;GCTATGCTGCTGACCGGCGC;GCGTTTCCCGCCTTACCACG;TTTGCTTCGCTAGTACGCTG	-0.69;0.4;0.57;0.65	15160;68822;73140;74731	1.08E+00;5.97E-01;3.93E-01;1.10E-01	4903;6494;10812;64474	2.06E+00;1.47E+00;6.91E-01;3.67E-01
	Scn9a	0.232018	0.999633	4	TATCTCAAACCGTACCCTTG;CTGAGTACACGAGTTTAGGG;GTGTCCGTAGAGATTTAATG;GCCAGTTCCAAGGGTCACGG	-0.16;0.08;0.23;0.77	41506;55266;62447;76497	6.41E-01;5.68E-01;3.81E-01;6.98E-02	3137;17187;24368;38128	1.28E+00;1.10E+00;8.55E-01;7.65E-01
	Ephb1	0.231886	1.09172	4	GATAGATGTCTCATTCACGA;CAGCACGTATCGATGGGCTA;TCATCCAATAAGGCTCCCCA;GTGTTGTAGCCTGTCCTGCG	-0.5;-0.36;0.8;0.99	22981;30585;76779;78267	8.91E-01;4.74E-01;3.81E-01;3.01E-02	1367;2855;49049;56653	2.14E+00;1.19E+00;5.91E-01;4.45E-01
	Syne1	0.23182	1.04979	4	GGATCGCTATGGTGATACCG;TTGCTCCCCACTGTTGTACG;GGTGAAGCGTATTCATGCTG;CCTGGATCATCAAGTATGGG	-0.09;0.15;0.27;0.6	45967;58370;63943;73706	7.58E-01;6.39E-01;3.89E-01;1.34E-01	5928;15691;21264;33665	1.50E+00;1.25E+00;8.23E-01;6.27E-01
	Vcpip1	0.2318	1.10007	4	TATGGGACGATGTAACACAT;GCGTGTCGTGCAAATACAGG;ACTAATTCTAGGTCTACTGG;ATTCGAATAACAACTAACGA	-0.19;0.28;0.4;0.44	39955;64353;68628;69829	8.41E-01;6.05E-01;4.51E-01;2.28E-01	9804;11006;15281;39679	1.64E+00;1.21E+00;1.07E+00;4.79E-01
	Shh	0.231654	1.08243	4	AGGAAAACACGGGAGCAGAC;TGGCGCCGCACAACGACTCG;AAACTGCTTGTAGGCTAAAG;GTGCTGGCGGCTGACGACCA	0.05;0.05;0.19;0.64	53361;53570;60570;74520	1.02E+00;5.36E-01;3.75E-01;1.15E-01	5114;19064;26064;26273	1.93E+00;1.03E+00;7.01E-01;6.77E-01
	Cela1	0.231507	1.12716	4	TCCGGAAACTGACGCCCGCG;CAACCACTCGATAAGTCATG;CTGCACGTTCACATACTGCT;GATGTCCCATTCAGCCAATG	0.05;0.15;0.27;0.46	53322;58678;63826;70476	1.02E+00;6.47E-01;3.88E-01;2.12E-01	9158;15808;20956;26312	1.92E+00;1.27E+00;8.18E-01;4.96E-01
	Lemd3	0.231292	0.992614	4	GGAGCACTACTCGGACTCGG;CAGGAGCCGAAACCTCGAGG;TAATAACAATAACACGGCGA;CAATAATCACATAGGCGGCG	-0.43;-0.08;0.59;0.84	26769;46177;73674;77200	6.25E-01;4.48E-01;4.05E-01;5.39E-02	2434;5960;33457;52865	1.54E+00;9.53E-01;7.64E-01;7.12E-01
	Zfp697	0.231271	1.06461	4	CACTCGCCGGCCAAACCGAA;TCCCTGGGCGGTCGACACCG;AGCATATCCCGGAGTCCGCG;ACAGGATGATGATCTAAGAG	-0.17;0.16;0.46;0.48	41312;58822;70353;71033	6.51E-01;6.36E-01;4.93E-01;1.99E-01	8601;9281;20811;38322	1.28E+00;1.27E+00;1.20E+00;5.13E-01
	NO_CURRENT_159	0.2312	0.97446	4	GAGCAATAATATCTTCCTAG;GAGAGCTCGTCTTCAATACC;GAGATTCGATACTGCGGTCA;GAGATTAAATTAACGCCGGC	-0.18;-0.14;0.24;1.0	40666;43085;62503;78345	6.21E-01;4.32E-01;3.81E-01;2.83E-02	1289;17131;36549;38968	1.24E+00;1.21E+00;7.67E-01;6.79E-01
	Slc38a10	0.231068	1.01359	4	TGCACGGCAGAATCATCATG;TCACCTGTAGCAGCACGGCA;TTGACGCAAGAAGCTCGCAG;GCTTCACAGGAGCAACGATG	-0.68;0.17;0.42;1.01	15497;59579;69395;78420	6.72E-01;4.68E-01;3.91E-01;2.67E-02	1214;10239;20056;64137	1.32E+00;1.23E+00;1.12E+00;3.76E-01
	Pdss1	0.230935	1.06912	4	AGCCTTTAGACCGATTATTG;TATACTATGCATAGTTGGGG;GAGGCGGCACGTGTTCCGAG;GTTATTGAAGATTTGGTGCG	-0.01;-0.0;0.4;0.54	50075;50727;68689;72470	8.91E-01;4.94E-01;4.52E-01;1.64E-01	7164;10945;28907;29559	1.72E+00;1.07E+00;9.14E-01;5.67E-01
	Ufsp1	0.230762	0.980144	4	CTCTGCCTAGAACACTTCGG;CGGGAGCCCCGGAATCCGGG;TGGCAGTCCAGGCACGCCCG;GCTTTATTCACACTTTACAA	-0.67;-0.33;-0.04;1.95	16178;32006;48703;79583	4.60E-01;4.49E-01;3.86E-01;1.09E-03	51;30931;47628;63457	2.59E+00;4.70E-01;4.64E-01;3.94E-01
	Ypel4	0.230724	0.953615	4	CTTGGTGGGTAAACATGCGG;TGGCCAAGTGTGCTCGACAG;TTCCTGAGACAGGGTCAACG;AGAAAATGTCAGCTACCGAG	-0.37;0.02;0.27;0.99	30042;52143;64053;78301	5.13E-01;4.38E-01;3.90E-01;2.93E-02	1333;15581;27491;49592	1.20E+00;9.68E-01;8.28E-01;8.23E-01
	Tmem141	0.230471	1.02611	4	CCCCTAATCCCAGGGACTCG;CCAGTCGCACGCCTTCATGA;GTCCCGTGTGGATGACGCCG;AGTTTCCATACCCTGTGCAG	-0.42;0.15;0.55;0.64	27285;58498;72848;74529	6.42E-01;5.83E-01;4.10E-01;1.15E-01	5105;6786;21136;52349	1.44E+00;1.26E+00;7.29E-01;6.77E-01
	Srgn	0.230458	0.989628	4	TGGGTCCGCTGCAAACCGAA;TCATCTATTAGGTCAAACTG;GCACTGAAGATCCCCAAACC;AAAACAGGATTATTCATGGG	-0.14;-0.0;0.27;0.8	42911;50690;63785;76729	6.75E-01;4.93E-01;3.88E-01;6.45E-02	2905;15849;28943;36723	1.34E+00;9.13E-01;8.84E-01;8.17E-01
	Kifc2	0.230439	1.11781	4	CTGGCGTCCTCGGTAACATG;TCTTTACAGACCATCTAGAG;CGGATGGCCAGCCTTCGTCA;CTGATGTGAATTGATCCGGA	-0.03;0.16;0.39;0.4	49292;58964;68419;68713	8.63E-01;6.54E-01;4.47E-01;2.56E-01	10921;11215;20670;30342	1.68E+00;1.29E+00;1.06E+00;4.53E-01
	Plekhg6	0.230374	0.980893	4	TCTGATGACTCCTGTACTAG;TCTGGTTCCCGAAGCACCAG;CCTTCGAGTAAAGCAGACCA;GTTCTACAGAGCGTGCACGG	-0.29;0.13;0.29;0.79	34175;57682;64561;76718	6.21E-01;4.96E-01;3.94E-01;6.48E-02	2916;15073;21952;45458	1.22E+00;9.74E-01;8.83E-01;8.50E-01
	Ypel2	0.230358	1.00976	4	TCACACTGAGTTGAAGAGGT;TCACGACGAACTCATTTCCA;TTCACAGTAAATGTCTGCAA;CTTTGGCACAGAGTTAATGT	-0.37;0.2;0.4;0.69	29670;61012;68769;75394	7.15E-01;4.54E-01;4.34E-01;9.50E-02	4240;10865;18622;49962	1.41E+00;1.08E+00;8.10E-01;7.43E-01
	Nsun5	0.230308	1.03746	4	GCCCGACTCAAGGTTCATCG;AAGACTTGCGAGCTCTCAAG;GTGTTCACACGCACGAACCG;CTTTCGACCAGGACGCTAAG	-0.17;0.15;0.38;0.56	40791;58729;68203;72935	6.48E-01;6.24E-01;4.43E-01;1.53E-01	6700;11431;20905;38843	1.27E+00;1.25E+00;1.04E+00;5.87E-01
	Soga3	0.230244	1.02413	4	ATCCGGGCCCTCGAAAGTCG;CAGATGCACACTAAAAACGG;GGCGTCCGCGCAACGCAGAG;TTCTCTTCGTCAGACCGCCG	-0.28;-0.23;0.63;0.8	35036;37402;74408;76773	6.69E-01;5.10E-01;4.29E-01;6.35E-02	2861;5226;42232;44598	1.65E+00;1.01E+00;8.90E-01;5.53E-01
	Sds	0.230139	0.949497	4	TCCACTGACAGCTGGCAACG;GCTCCAACTTACCAGATGAG;TCAGGCTCCTTCAAGATCCG;GGTGTTGGGCACAACGATAG	-0.34;-0.04;0.3;1.01	31454;48470;64994;78375	4.68E-01;4.56E-01;3.98E-01;2.77E-02	1259;14640;31164;48180	1.22E+00;8.73E-01;8.69E-01;8.36E-01
	H2afy	0.230127	1.00846	4	AGAAGGGACGGGTCACACCC;CCCTAAGTATAGGATCGGAG;CAGCGCAGACAGTACGACGG;GAGTTGCTAGCGAAGAAGCG	-0.15;0.02;0.04;1.01	42421;51983;53143;78381	6.63E-01;5.11E-01;4.03E-01;2.75E-02	1253;26491;27651;37213	1.32E+00;1.22E+00;9.61E-01;5.29E-01
	Sprtn	0.22983	1.05477	4	ACCAAGAAAGGACCTTGTAG;GACGCGTCCACCAACGACAC;ATGGAAAGTGTGGTAGACCT;ACCAGTAGTCATGAACAGAG	-0.62;-0.07;0.76;0.85	18027;46630;76381;77239	8.41E-01;4.52E-01;3.78E-01;5.30E-02	2395;3253;33004;61609	2.04E+00;9.59E-01;7.78E-01;4.46E-01
	Cort	0.229383	0.977621	4	ACCACACTGTCCTGGCCAGT;AGCAGGAAGCCACCGAGGGG;AGGGCCACTCTCCAGGGGAA;GGGGGTACCCCCTCCGACGG	-0.66;-0.13;0.39;1.31	16483;43489;68394;79286	4.47E-01;4.33E-01;3.84E-01;7.59E-03	348;11240;36145;63151	1.76E+00;1.05E+00;6.90E-01;4.03E-01
	1810009J06Rik	0.229264	1.44367	7	TCGACACCCAGACTATAACA;GATGGCATTAGCCATCAGTG;AGAAGACTCCAGGTTCGCCT;TCTTGTCATCACTGTTAGCT;AGACTATAACAAGGACACTG;ACACAATATTGATGTCCTTG;GTTAGCTGGGAGAGCAACTG	-0.09;-0.01;0.15;0.22;0.35;0.44;0.56	45572;49973;58396;61716;66926;69898;73002	1.61E+00;1.23E+00;1.16E+00;8.42E-01;6.49E-01;4.07E-01;2.64E-01	6632;9736;12708;17916;21238;29661;34062	2.58E+00;1.93E+00;1.82E+00;1.38E+00;1.15E+00;7.86E-01;4.61E-01
	Olfr767	0.229016	1.27625	5	TGACTCATCAAAGTGATGGG;CAGCAGGGTGAGGATGAGGA;GGTCCTGGTCAGCATTACAA;GTTCTCTGCTCTTGGCTAGG;GAACAGGAGAGTTCTAGAAG	-0.05;0.2;0.25;0.31;0.44	48253;60776;62991;65506;69804	1.14E+00;1.11E+00;6.65E-01;3.91E-01;2.86E-01	9830;14128;16643;18858;31381	2.02E+00;1.92E+00;1.24E+00;7.56E-01;4.38E-01
	Cdk17	0.228965	0.977995	4	CTGCATAGGACTTGAATAAG;CTTCCTCCAATAACACTGTG;TTCCTGTACCAAATTCTCCG;CAAATTGGAAAAGCTCGGAG	-0.18;-0.11;0.38;0.83	40274;44649;68049;77079	6.12E-01;4.40E-01;4.39E-01;5.66E-02	2555;11585;34985;39360	1.22E+00;1.03E+00;9.34E-01;7.21E-01
	Olfr638	0.228844	0.98104	4	TGTGCGGATGACAGTTAGGA;CCATGAATGAGAACCCATGG;CTGACATCAGAGTCAACAGA;TTTCCCGAATGTTGAACCAG	-0.16;0.0;0.24;0.83	41767;50973;62700;77088	6.47E-01;4.97E-01;3.82E-01;5.64E-02	2546;16934;28661;37867	1.29E+00;9.35E-01;9.23E-01;7.74E-01
	Gtpbp3	0.228781	0.963372	4	CCACAACATTTGCCCCCGAG;GTCAATGTAGGCCTCCACAT;GTGGAGTTTCACGTACACGG;AGTCTCCAGCACGTCACGGG	-0.49;0.12;0.28;1.01	23470;56937;64386;78393	6.04E-01;3.93E-01;3.83E-01;2.73E-02	1241;15248;22698;56164	1.23E+00;1.18E+00;8.42E-01;6.07E-01
	Adck2	0.228552	1.05404	4	AGCGAACGCTTTGTACACTT;GCTTAGCTTGCCTGAGATCG;GAATATCCCTAGTGATGAGG;CCTCTGAAAAGAGGTCGCGC	-0.15;0.16;0.4;0.5	42063;59217;68731;71646	6.61E-01;6.54E-01;4.53E-01;1.84E-01	7988;10902;20417;37571	1.30E+00;1.30E+00;1.08E+00;5.34E-01
	Utrn	0.22852	1.03247	4	CACGATAGATGCCATCCGAG;GTTGACGTCGGAATTCAACG;TAAGGAATGTAAACACAACA;AGAGTGTACAGTGATCGGAG	-0.03;0.03;0.16;0.75	48925;52744;59078;76245	8.51E-01;5.23E-01;3.75E-01;7.55E-02	3389;20556;26890;30709	1.66E+00;9.91E-01;8.26E-01;6.58E-01
	Mpzl2	0.228446	0.962715	4	CGGACGGTTCAAAGACCGGG;TGTGGAAATTTACACCTCCG;AATTTCCGACCTCGAGATGG;AGTTAGCGCATCTCCCACAG	-0.25;-0.01;0.16;1.0	36716;50394;59276;78351	5.40E-01;4.90E-01;3.75E-01;2.82E-02	1283;20358;29240;42917	1.21E+00;1.07E+00;9.02E-01;6.63E-01
	Zc3h8	0.228367	1.05447	4	AGTTTAGCGCTTACTCTGCT;GACTATGACCCATATAGTGA;CCTTGACTCATCCTCACACG;AAAACCGGCCGCCGACCCTG	-0.25;0.27;0.35;0.54	36570;63911;66996;72594	8.22E-01;5.37E-01;4.23E-01;1.61E-01	7040;12638;15724;43064	1.61E+00;1.07E+00;9.71E-01;5.72E-01
	Fzd2	0.228082	1.02149	4	AGAGGACGGTTATCGCACGG;CCTGTGCTCCATGTACGCGC;CGGACCGGCCCAGTTCCACG;CAGGAGCTCCGTCCTCCGAG	-0.14;0.03;0.43;0.6	42699;52351;69723;73731	6.70E-01;5.17E-01;4.76E-01;1.34E-01	5903;9911;27283;36935	1.33E+00;1.15E+00;9.76E-01;6.28E-01
	Slc27a1	0.227936	1.07217	4	GAGGCAGCCGGTTCGCGACG;GGCTAGAGCTGCGACGACAC;ATACCTGCAGAGTGGTAGAG;GGATGGGGTACACATGCGTG	0.02;0.02;0.32;0.55	51749;52002;66109;72777	9.52E-01;5.11E-01;4.10E-01;1.56E-01	6857;13525;27632;27885	1.82E+00;9.62E-01;9.23E-01;5.80E-01
	Gria1	0.227936	1.06318	4	TGTCAACATTCTAACAACCA;CGTCGCTGACAATCTCAAGT;AGTTTAACGAGAAAGGGCGC;ATGTTCACAATATCGATCTG	-0.13;0.14;0.43;0.47	43235;58171;69668;70829	6.83E-01;6.33E-01;4.75E-01;2.04E-01	8805;9966;21463;36399	1.36E+00;1.24E+00;1.14E+00;5.07E-01
	Ski	0.227918	1.07969	4	CTGCGGGCTCATCACTAAGA;TGTCTCGAATCAAAGCTGGG;CAGTCCACCCTGCACCACCG;GAGTGTACAACGAACTTGTG	-0.55;0.29;0.57;0.6	20942;64729;73257;73763	8.57E-01;6.03E-01;3.76E-01;1.33E-01	5871;6377;14905;58692	1.67E+00;1.49E+00;6.30E-01;5.30E-01
	Akap1	0.227902	1.01508	4	GAGGGGGCAAGTAACCCGAG;CCTCGGCCACTCAGCCTAAG;CTGAAGGGCTGAGTACTGAC;GCAGACACGAGGTCGCAGCC	-0.2;0.17;0.3;0.64	39549;59484;65155;74506	6.69E-01;5.96E-01;4.00E-01;1.16E-01	5128;14478;20150;40085	1.32E+00;1.19E+00;8.77E-01;6.76E-01
	2010107E04Rik	0.227872	1.06948	4	GGGTATAGTAGGGTTTCATG;GTTTACCAGGAAATTTGGGT;CCAAATTTCCTGGTAAACCT;AACCTTGATTCAAAAAGTCT	0.02;0.07;0.14;0.68	52220;54632;57847;75228	9.71E-01;5.55E-01;3.77E-01;9.89E-02	4406;21787;25002;27414	1.85E+00;1.07E+00;7.29E-01;6.25E-01
	NO_CURRENT_148	0.227733	1.10297	4	CTTGGTCTGAGATTGCACAG;CTTGACACCTCGTCCGCATC;CTTTAGTCACGATATACGTC;CTTTATACCGCGCGTCGGCA	-0.01;0.1;0.4;0.42	50359;55999;68642;69436	9.01E-01;5.83E-01;4.51E-01;2.38E-01	10198;10992;23635;29275	1.74E+00;1.13E+00;1.07E+00;4.69E-01
	Ppp1r3f	0.227555	1.00906	4	CCTCTGTAAAAGCCACAGGT;CTGACAGATGAGCCCGCCAG;TATGCCCAGGGCATGAGTGG;GTGCGCTATGAGACCCCCGA	-0.32;-0.23;0.62;0.84	32852;37682;74168;77141	6.54E-01;4.76E-01;4.28E-01;5.52E-02	2493;5466;41952;46782	1.61E+00;9.44E-01;9.24E-01;5.58E-01
	Lyg2	0.227508	1.08681	4	CGGCAAACATTTCCGAACCG;TCTGTACCATGGCTGCTATG;TATCCCAGGAACCAATAGGA;TCAGATTATTTATGTCGCAG	-0.09;0.18;0.38;0.44	45835;60060;68002;69870	7.54E-01;6.86E-01;4.39E-01;2.27E-01	9764;11632;19574;33799	1.49E+00;1.35E+00;1.03E+00;4.80E-01
	Gm4064	0.227428	2.13836	17	ATGGCCAGTCTTCTAATGAT;AAATATGAATCAACATCCAG;GAGATGAGTATCCATTACCA;AATACTGGACTAAGAGGACG;CAGCATTCTTAGCATCTGCA;CTGCAAGGCGTCGGAAAGTA;CTAGAAATCTCTCTTCGATG;AGAAGCAATACTGGACTAAG;GCTTCAAGAATTCTGAAATG;CTATGGCAATTACCACTCTC;GCCATAGTCACAGTTTCCTC;TGTCAAAGAAATGAATGGAG;CTACCACTTTCAAGTGATGA;AGATGAGTATCCATTACCAA;TCTTAGCATCTGCAAGGCGT;TCATCTCTTCTGGAAGACGC;TTAAAACTTAGTGATCATGC	-0.51;-0.39;-0.26;-0.2;0.02;0.04;0.07;0.15;0.35;0.35;0.38;0.41;0.45;0.49;0.55;0.95;1.02	22725;28606;35754;39391;51776;53246;54636;58772;67069;67076;68045;68895;70115;71379;72658;78059;78431	2.70E+00;2.62E+00;2.23E+00;2.07E+00;1.91E+00;1.89E+00;1.83E+00;1.70E+00;1.68E+00;1.66E+00;1.65E+00;1.31E+00;1.03E+00;7.86E-01;6.12E-01;5.79E-01;1.12E-01	1203;1575;6976;8255;9519;10739;11589;12558;12565;20862;24998;26388;27858;40242;43880;51028;56909	3.43E+00;3.30E+00;2.84E+00;2.70E+00;2.48E+00;2.45E+00;2.44E+00;2.42E+00;2.31E+00;2.25E+00;2.23E+00;1.82E+00;1.48E+00;1.40E+00;1.18E+00;8.97E-01;6.96E-01
	Gm2663	0.227386	1.58666	8	TCGACACCCAGACTATAACA;GATGGCATTAGCCATCAGTG;AGAAGACTCCAGGTTCGCCT;GCTCCCTTATCAATGATCAG;TCTTGTCATCACTGTTAGCT;AGACTATAACAAGGACACTG;ACACAATATTGATGTCCTTG;GTTAGCTGGGAGAGCAACTG	-0.09;-0.01;0.15;0.21;0.22;0.35;0.44;0.56	45572;49973;58396;61546;61716;66926;69898;73002	1.92E+00;1.53E+00;1.53E+00;1.18E+00;7.49E-01;6.00E-01;4.06E-01;3.02E-01	6632;9736;12708;17916;18088;21238;29661;34062	2.95E+00;2.30E+00;2.27E+00;1.81E+00;1.19E+00;1.02E+00;7.18E-01;4.41E-01
	Draxin	0.227267	0.991135	4	AAATAAGGCCATGTCCAGTG;ATGCAAGGGTGCCTGCCGTG;TTCTTCCTGACCATGACAGA;TTTCTTCACCCTCTCCCAAG	-0.12;-0.04;0.11;0.96	43990;48391;56816;78083	7.03E-01;4.67E-01;3.81E-01;3.41E-02	1551;22818;31243;35644	1.40E+00;1.13E+00;8.33E-01;6.01E-01
	Cdh13	0.226974	1.01955	4	GCAGAACTCGTGATTGTCGG;CGCTGTCATCCGCATCACCG;CCAGCCTGCCGAATTCATCG;GCAGAGATCTCATAGTCCAG	-0.29;0.24;0.31;0.64	34504;62686;65412;74639	7.74E-01;5.01E-01;4.02E-01;1.13E-01	4995;14223;16948;45130	1.52E+00;9.87E-01;8.89E-01;6.85E-01
	Mfsd4b3	0.226394	1.14594	4	ATGCTGAACCAATCCTCCAA;AAATCCGCGGCATCTGCTGA;CCCCCCAAAGAGTCAAGATG;CTGTGGACATATGCTTCCAT	-0.79;-0.24;0.91;1.02	11817;36995;77802;78439	1.07E+00;4.36E-01;4.30E-01;2.62E-02	1195;1832;42639;67817	2.52E+00;1.24E+00;5.45E-01;2.79E-01
	Zc2hc1c	0.22604	1.14316	4	CGGAGCTCCATAGGACCGAG;ACGTCTGCACAAAAGCCCGG;CTGAACTCTGGGGACAAGCA;ACTTGTCTAGTCCGACACCC	-0.99;0.23;0.66;1.0	6646;62265;74909;78326	7.58E-01;7.04E-01;5.90E-01;2.87E-02	1308;4725;17368;72988	1.73E+00;1.49E+00;1.20E+00;1.51E-01
	Rab11fip3	0.226031	0.962502	4	GGAGCAGCAGCAATGCACCA;CGCACCGTGCCTCTTGACGG;GGACGGCTTCGTCCGCATCG;ATTCTGTCACTTGCTCAAGG	-0.34;-0.04;0.46;0.82	31602;48774;70527;76950	4.98E-01;4.71E-01;4.58E-01;5.95E-02	2684;9106;30860;48032	1.21E+00;9.15E-01;8.78E-01;8.46E-01
	Slc7a15	0.225566	0.953855	4	ATCTACGTATACGTTCTGGT;GCAGGTAACTGATATTGACC;ATGTAAACCAAGACCCCTTG;GTTCTAGGGACCGAGTTCTG	-0.38;-0.22;0.33;1.18	29155;38268;66254;79023	4.28E-01;4.27E-01;4.12E-01;1.34E-02	611;13380;41366;50479	1.52E+00;9.31E-01;7.92E-01;5.70E-01
	Tctex1d2	0.225439	1.01012	4	ACTTAGGTTTAGACCCTCTG;ATATGACCGGTATAAAATGG;GAAAATGGGCCTCAGAATGT;TCACTCCGAGGGCTTGAGTG	-0.14;0.13;0.25;0.67	42887;57384;62891;75037	6.74E-01;6.14E-01;3.83E-01;1.03E-01	4597;16743;22250;36747	1.34E+00;1.20E+00;7.81E-01;7.14E-01
	4930432K21Rik	0.225422	1.01034	4	GTAGTGTGAATGGACCATCA;TCTTGAGCCACAGACCAGGT;GCTCTTTGGGTGATCCTGCG;TGAGAAACAAGAGCCCGTGA	-0.45;0.2;0.48;0.67	25765;60705;71071;75075	7.06E-01;5.15E-01;3.97E-01;1.02E-01	4559;8563;18929;53869	1.39E+00;1.26E+00;7.17E-01;6.79E-01
	Fam189b	0.225365	1.05975	4	GAAGCGGCCATTCACTCTAG;CACAGCAGACAATAGCAGAG;CTGATGGGCTAGAGCCCCCG;GGGCAGTCAGTAGGATACAA	-0.03;0.08;0.33;0.53	49115;54935;66315;72171	8.57E-01;5.61E-01;4.13E-01;1.71E-01	7463;13319;24699;30519	1.67E+00;1.08E+00;9.34E-01;5.54E-01
	Krt32	0.225265	1.04374	4	AGATCCAAGATGTCTACCAG;CTGGTAGAAGCAGACACCAA;GTTGCATCTCTAGCTCCATG;GCGGCTGGCAGACATAACCC	-0.1;0.17;0.26;0.57	45096;59396;63592;73287	7.33E-01;6.66E-01;3.87E-01;1.44E-01	6346;16042;20238;34538	1.45E+00;1.31E+00;8.09E-01;6.05E-01
	Mamld1	0.225205	0.971764	4	TGGGGGTTATGTAAAACCAG;GTTGTGAATAGCAGTGCTAT;ATAATGGAGGCATAGTGACA;CTTTGCTGGAACATAGGGCA	-0.64;0.03;0.42;1.1	17213;52271;69306;78766	5.15E-01;4.66E-01;3.80E-01;1.90E-02	868;10328;27364;62421	1.37E+00;1.12E+00;9.73E-01;4.23E-01
	Ceacam5	0.22516	1.24344	4	CCCCCTTCAACAATGCTCGG;TCTGTATGCAGCCCCCACGG;GCTAATAATTGATGTCACTG;TCAAGATCGAATCACTTCCT	0.15;0.22;0.26;0.27	58653;61956;63373;63829	1.27E+00;7.47E-01;3.85E-01;3.84E-01	15805;16261;17678;20981	2.32E+00;1.47E+00;8.00E-01;3.88E-01
	Scx	0.224982	0.981912	4	CAGGTGAGAAATGTAGCTGG;GGGTACAGGTAGCGACCCGG;GGGTCCTGGCCCGCTACCCG;CACACGGCAGGGTTTCTCGT	-0.2;0.09;0.28;0.73	39077;55620;64504;75930	5.86E-01;5.75E-01;3.94E-01;8.27E-02	3704;15130;24014;40557	1.17E+00;1.12E+00;8.47E-01;7.92E-01
	Coq5	0.224965	1.00555	4	ATGAATGACATGATGAGTCT;GCCAGGATCTATGACACCCG;CTTCGGGTTTGAGACCGTGT;GTTGTGCCTGAACGTAACTA	-0.54;0.19;0.48;0.77	21394;60519;71046;76431	7.00E-01;5.14E-01;3.76E-01;7.13E-02	3203;8588;19115;58240	1.38E+00;1.26E+00;8.47E-01;5.43E-01
	Myd88	0.224944	1.08188	4	GCATCCAACAAACTGCGAGT;AAGGAGCTGAAGTCGCGCAT;GGTTCAAGAACAGCGATAGG;CCTGTCCTCAGGACAAACGC	-0.51;0.36;0.46;0.59	22571;67490;70505;73573	9.99E-01;4.97E-01;3.80E-01;1.38E-01	6061;9129;12145;57063	1.92E+00;1.21E+00;6.20E-01;5.79E-01
	1810011O10Rik	0.224661	1.10286	4	GCCCACAGCTTTCTTGCGAG;CAGAGGCTCTTCAGGAACTC;CATCTTTGAGAACATAGACC;CTGTGTCGAAGTGGTAGCCG	-0.08;0.21;0.36;0.4	46387;61548;67521;68671	7.71E-01;7.33E-01;4.31E-01;2.57E-01	10963;12113;18086;33247	1.52E+00;1.44E+00;1.00E+00;4.52E-01
	Lin28b	0.224597	0.938847	4	ATACGGGTAACAGGCCCAGG;GCACGTTGAACCATTTACAG;GCATGATGCTCTGACAGTAA;CATCTCCATGATAAGTCGAG	-0.36;-0.07;0.31;1.02	30377;46854;65574;78433	4.54E-01;4.42E-01;4.04E-01;2.64E-02	1201;14060;32780;49256	1.24E+00;8.97E-01;8.35E-01;7.85E-01
	Crb2	0.224447	0.953516	4	AAGGCCCATAGGTCCCCGGT;ACTCTCGAGACATGGCACTG;GACTGCCCGAGACCTTACCG;TCTGACCCGACCTTGTACGG	-0.25;-0.09;0.36;0.88	36597;45842;67290;77488	5.37E-01;4.46E-01;4.27E-01;4.74E-02	2146;12344;33792;43037	1.07E+00;1.00E+00;9.87E-01;7.55E-01
	Arrdc2	0.224246	1.11947	4	GTTCACTGTCATTGAACCTG;GTCTGTACTAGGGCAGCACG;TCGGCCAAGATTGACCGCAA;GCGCTGCGTATCCCCCCGGT	-0.13;0.31;0.32;0.39	43638;65406;66103;68471	8.89E-01;6.94E-01;4.10E-01;2.62E-01	11163;13531;14228;35996	1.73E+00;1.38E+00;9.23E-01;4.48E-01
	Eaf1	0.224211	1.18376	4	AGGGATGTGTGGCAGCGTAA;GGAACACTGTCTGCGGCTAG;CTCACTCACAGCGAATCGTG;GGTGAGGGGTTATCCTTCAG	-1.11;-0.01;0.8;1.22	4509;50004;76833;79106	8.98E-01;7.21E-01;4.85E-01;1.15E-02	528;2801;29630;75126	2.16E+00;1.59E+00;8.88E-01;1.01E-01
	Papola	0.224127	1.00252	4	AGTATTACCTACCTTTCGTG;TAAGATGGTACCTATCACTG;CTCCCATTAATCAGGTTGCA;ACTTCTAGCAAGTGCGCCCA	-0.21;0.16;0.31;0.64	38544;58940;65573;74560	6.54E-01;5.75E-01;4.04E-01;1.14E-01	5074;14061;20694;41090	1.28E+00;1.15E+00;8.97E-01;6.79E-01
	Krt82	0.224097	0.988604	4	GCTCGGCCTCTAGTCTGCCG;GCCAGGCTTCGGGTACCGAG;ATTCGCATCCTTCATCAACA;GGTTGCGTAGGTTGTCACAG	-0.11;-0.05;0.13;0.92	44712;48250;57584;77840	7.23E-01;4.66E-01;3.78E-01;3.96E-02	1794;22050;31384;34922	1.43E+00;1.07E+00;8.29E-01;6.19E-01
	NO_CURRENT_186	0.224017	1.03446	4	GCTAAAAACAACCGGCGCGG;GCTAAACGTATTTTACGGGC;GCGTGGAGTTCGTCGCTCTT;GCGTGGTACTCACATCGCGA	-0.56;-0.12;0.75;0.83	20402;44032;76155;77114	8.16E-01;4.36E-01;3.75E-01;5.58E-02	2520;3479;35602;59232	1.98E+00;9.40E-01;7.04E-01;5.14E-01
	Prr18	0.223941	0.951324	4	TACCGGGGGCCTCTTCAAGG;TCCGGGGACAGGGTACCAGT;ACGTGGTCGAGGTCCCCCCA;CCGAGGCGGTGGATCCCGCT	-0.4;0.09;0.21;1.0	28018;55545;61206;78370	5.73E-01;4.17E-01;3.76E-01;2.78E-02	1264;18428;24089;51616	1.22E+00;1.11E+00;7.53E-01;7.22E-01
	Dennd4b	0.223806	1.08862	4	TGCCCGCCGATACATGAGGT;AGTCATGCTAGAGATGCGAC;GTTACCTGTTTGGTTCGGCG;GTTCTATGAAGCGTTCCCGA	-0.77;0.38;0.39;0.9	12443;67921;68359;77690	1.02E+00;4.46E-01;4.25E-01;4.29E-02	1944;11275;11713;67191	1.96E+00;1.05E+00;1.04E+00;2.95E-01
	Chit1	0.223749	1.01772	4	GCAGCTGTACCGAGTGATCG;TGCCCCAGGCCCCTATACGA;ACTTAGGGCTGACTTCACAA;CTGGTCCCAGTACCGGACGG	-0.15;0.11;0.35;0.58	42170;56780;67088;73463	6.57E-01;6.00E-01;4.24E-01;1.40E-01	6171;12546;22855;37464	1.31E+00;1.17E+00;9.76E-01;6.14E-01
	Cyp4a31	0.223585	1.04815	4	GGTGGACACATTCATGATCG;CCAAAGAACCAGTGAAAGGG;ACCTAGTTCACTCTCGTGTG;GAAAACCTATGTGAAAAACA	-0.12;0.21;0.24;0.57	44094;61300;62449;73215	7.25E-01;7.06E-01;3.81E-01;1.46E-01	6419;17185;18334;35540	1.43E+00;1.40E+00;7.65E-01;6.01E-01
	Fam159b	0.223518	1.05584	4	GCCGCAGCAATAGAGCAGCG;CCTACAAGCACAGCTACATG;GACACAGACACTGATGACAA;GGAAAGGCTCCACGAAGCTG	-0.17;0.2;0.39;0.47	41154;60809;68443;70858	7.09E-01;6.32E-01;4.47E-01;2.03E-01	8776;11191;18825;38480	1.39E+00;1.26E+00;1.06E+00;5.08E-01
	Gimap6	0.223487	0.949757	4	GAAGCGGGAAAAGTGCAACA;ACATACTGGGACTTACCACT;TCTGAGGTGAAAAAATATCT;GTGCTGCTGGTGATACAGGT	-0.33;0.02;0.35;0.85	32075;52107;66941;77300	5.13E-01;4.64E-01;4.22E-01;5.17E-02	2334;12693;27527;47559	9.70E-01;9.68E-01;9.66E-01;8.95E-01
	Samd3	0.223246	1.05985	4	TCAGCGTGGATGTATCTGCG;TGTAAATTTGGACACCGAAG;CCTGGCCCTTAATGATCGGA;AGAATCTGCTCATTTAGACT	-0.05;0.06;0.39;0.49	48252;53911;68503;71240	8.29E-01;5.42E-01;4.49E-01;1.93E-01	8394;11130;25723;31382	1.62E+00;1.06E+00;1.04E+00;5.20E-01
	Nav3	0.223172	1.04359	4	AACCGACTAAGATCGGCTCA;GTGTGTGACCTGCATAACAC;GTGCACTCAAGACCCCTGGT;GAGCGGATGATATCAACAGT	-0.05;0.13;0.17;0.64	48147;57645;59599;74499	8.25E-01;6.20E-01;3.75E-01;1.16E-01	5135;20035;21989;31487	1.61E+00;1.21E+00;6.75E-01;6.72E-01
	Myadml2	0.222993	1.09329	4	CACAGCAGCCTTCGCCATGT;GGGGGTGCATACCTGCACTT;AGCATTCGGGCTGTACCCAC;GGACACCCCCAAAACCACCT	0.05;0.1;0.23;0.51	53589;55889;62320;71885	1.03E+00;5.80E-01;3.80E-01;1.78E-01	7750;17314;23745;26045	1.94E+00;1.13E+00;7.60E-01;5.43E-01
	Gpr89	0.222776	1.09426	4	GCATGAAAATGCAAAGGTCA;CAGCCGGGTAGGCGTAATCG;GATAAAGTATGTGTTACCTG;GGATGTGCAGAACAAGCCGT	0.04;0.1;0.28;0.48	52884;55977;64299;70958	9.97E-01;5.82E-01;3.92E-01;2.00E-01	8676;15335;23657;26750	1.90E+00;1.13E+00;8.38E-01;5.11E-01
	Pcdhb18	0.22247	0.96751	4	CAGCCCGGTAAATCTGAAAG;TAGGATGTAAAAATTGTCCA;GAACCGTACATCTCGCCGAA;ATTTGTGGCGAACCTAGCAA	-0.22;0.04;0.32;0.75	38311;52923;65736;76258	5.70E-01;5.26E-01;4.06E-01;7.52E-02	3376;13898;26711;41323	1.14E+00;9.99E-01;9.05E-01;8.27E-01
	Epdr1	0.222131	1.03314	4	GATCCCAGGATTCCACCAAG;AAGATCAGTACTCCATCGGA;GCTGATCCCCTGCAAGAGGT;GCGCTGGTTGAGACCATCGT	-0.34;-0.31;0.7;0.85	31268;33261;75443;77233	7.47E-01;4.54E-01;4.50E-01;5.32E-02	2401;4192;46371;48367	1.83E+00;9.59E-01;8.66E-01;4.82E-01
	Smyd4	0.222042	1.00586	4	GGTGCGTAAGACAGAATGCC;ACTTTGGCCACAGTACCTTG;ATGATGCTCTCGTTAGACCC;ACTTTCTAGTAGTTACTCGG	-0.25;-0.09;-0.09;1.32	36330;45753;45872;79289	5.32E-01;4.89E-01;4.45E-01;7.52E-03	345;33762;33881;43304	1.77E+00;1.06E+00;7.52E-01;4.46E-01
	Qprt	0.221799	1.00715	4	ACGGGTGGCTCTTAACACCC;GCTGTGGGCCAAATCTCCTG;GCACGAGGAAGACGACACCT;GGGTGCCGACCCGGTAACCA	-0.49;0.13;0.57;0.68	23531;57789;73126;75195	6.24E-01;5.97E-01;3.84E-01;9.96E-02	4439;6508;21845;56103	1.47E+00;1.22E+00;7.26E-01;6.08E-01
	Foxc1	0.221776	1.10461	4	GAGCTACTATCGCGCTGCCG;ATGTCCTGGATGCGCACGGG;TTCTATCGGGACAATAAGCA;CTGCGGCGTATAAGGCCCGT	-0.67;0.41;0.45;0.69	15965;69068;70322;75411	1.10E+00;4.92E-01;3.87E-01;9.46E-02	4223;9312;10566;63669	2.09E+00;1.19E+00;7.44E-01;3.89E-01
	Mkx	0.221564	0.984965	4	GCCCTGTGTGTGGATTGTCC;AGCTCAGCGATAAAAGCTGG;CATGTCTCAAGGAGTCGTTA;TGGCGCGTCCTCTTAAGCAG	-0.16;-0.06;0.41;0.69	41961;47521;68948;75390	6.51E-01;4.59E-01;4.58E-01;9.51E-02	4244;10686;32113;37673	1.30E+00;1.09E+00;8.05E-01;7.43E-01
	Jakmip1	0.221478	1.04516	4	ATCGCGCAGCACATTCAGCG;GACATGGCGGAGCTTATGGG;AGAGTTCACGTACCAGTCTG;GAAGCTCAAGAGCCTCACGA	-0.55;0.35;0.35;0.73	21105;67000;67103;75978	9.71E-01;4.24E-01;3.76E-01;8.16E-02	3656;12531;12634;58529	1.87E+00;9.77E-01;7.97E-01;5.35E-01
	Ccdc137	0.221374	0.957296	4	CTGTCCCGAGCCTCTAAGAC;CCTGCGCTGTCCGGGCAGTG;GGTGGCTTTCAAGAAGACGT;GAATTGCAAGCCTAAGAACC	-0.3;0.08;0.32;0.79	33745;54992;65856;76650	5.62E-01;4.89E-01;4.07E-01;6.63E-02	2984;13778;24643;45889	1.09E+00;9.58E-01;9.11E-01;8.74E-01
	Olfr393	0.221374	1.16622	4	GTGCCAGGCACCCTCCATAG;TTAGACAAGTACAGAGCTTG;AGACAATCTTGCTGCAAGCA;GAGGTACATGGCCAGAAACA	-0.87;0.4;0.6;0.75	9368;68832;73816;76220	1.08E+00;6.33E-01;4.90E-01;7.61E-02	3414;5818;10801;70266	2.06E+00;1.56E+00;8.23E-01;2.17E-01
	Yae1d1	0.221225	0.936117	4	TCCAATAAATCCGTAACTCG;GGGAATGGCAGGGTCACATG;CTTCAATCAAGGGTACAAAG;ATTACCATGAAGGTGACACC	-0.44;-0.15;0.32;1.16	25941;42335;65947;78964	4.29E-01;4.08E-01;3.99E-01;1.47E-02	670;13687;37299;53692	1.48E+00;9.15E-01;6.85E-01;6.61E-01
	Hacd2	0.221186	1.21108	4	GTAGATGACCAGGTACGCCG;TGAGAGCATACCTGGCTAAG;CCAGACAGGAGCCTTACTGG;TCTGCCTTATATCATCAAAT	-1.01;-0.08;0.97;1.0	6103;46285;78190;78367	1.16E+00;6.17E-01;4.49E-01;2.78E-02	1267;1444;33349;73531	2.72E+00;1.22E+00;7.68E-01;1.38E-01
	Olfr832	0.221087	0.984826	4	AGGAAGACTCCAAATAAGAC;CATGAATCCCAAACTCTGTG;GGAAATGAAGAAATACCTTG;AAATGAAATTCTGGTAATGA	-0.1;-0.03;0.15;0.87	45003;49183;58560;77414	7.31E-01;4.75E-01;3.76E-01;4.91E-02	2220;21074;30451;34631	1.45E+00;9.90E-01;8.60E-01;6.44E-01
	Tmed10	0.22106	0.99397	4	TTTCTTTCTCAGGAACAGGG;AAACATGTCATAGTCTTCCG;AGAGGCGAAAAATTATGAAG;CTCTCGCAAGTGTCTCCGAG	-0.54;-0.22;0.61;1.04	21256;37898;74107;78526	6.50E-01;4.28E-01;3.76E-01;2.43E-02	1108;5527;41736;58378	1.60E+00;1.27E+00;5.62E-01;5.39E-01
	BC003331	0.220976	1.13954	4	TGTCCGAGTGCTAACACAGT;TTACGATGTCCAAGATCCAA;CACTGTACTTACTCTGCGCA;CACTCTGGAAAAAAACACAA	0.06;0.12;0.35;0.36	54125;56869;67135;67241	1.05E+00;6.02E-01;4.25E-01;2.94E-01	12394;12499;22765;25509	1.98E+00;1.18E+00;9.79E-01;4.26E-01
	Dennd4c	0.220904	1.16846	4	GATTCATTGTTTGATCGACA;ATGATGTGCTTGTTAAGATG;GCTGGGCCTATTGACCCTCG;GAGGCCAGCGGTACTAACTG	0.12;0.12;0.31;0.34	56845;57131;65547;66542	1.17E+00;6.08E-01;4.04E-01;3.12E-01	13092;14087;22503;22789	2.17E+00;1.19E+00;8.95E-01;4.16E-01
	2019-09-02	0.220781	1.06011	4	AGTGGACACTCCCGGCTACG;GCGTGAGCGGCTTAAGAAAA;CACCGAAAATCAGTGAAGAA;CGCTACCTACATGATGAGAG	-0.2;0.26;0.35;0.47	39233;63504;67125;70828	8.05E-01;5.90E-01;4.24E-01;2.04E-01	8806;12509;16130;40401	1.58E+00;1.18E+00;9.78E-01;5.07E-01
	Pfkfb4	0.220442	1.01687	4	TGTCCCGGTTGACATAGTCA;TCCCCCCCAGAATTCAACGT;CCCCGGTCTTACCACCACGC;CAACCAATACGACCCGAGAG	-0.21;-0.2;0.61;0.68	38902;39501;74007;75119	6.44E-01;5.83E-01;4.26E-01;1.01E-01	4515;5627;40133;40732	1.59E+00;1.16E+00;7.20E-01;5.95E-01
	Ppp1r14c	0.220405	1.02996	4	CGGCGCCGAGTCCTCCCTTG;GGGTCAGCTGTACGGCTGCG;CTGCCGCCGGTTCCACCGCG;ACCGTAAGGAGCTTCGTAAG	-0.09;0.09;0.33;0.54	45717;55814;66408;72624	7.51E-01;5.79E-01;4.14E-01;1.60E-01	7010;13226;23820;33917	1.48E+00;1.12E+00;9.39E-01;5.73E-01
	Cyb561a3	0.220396	1.18854	4	TGGATGCAGTACTGGCGCGG;AGAGGTGTGCGATTCTCGAG;GCAGGCGAAGAGGACTACAG;GCTCATGGTTGCCGGCATGG	-1.2;0.29;0.51;1.29	3251;64526;71672;79243	8.48E-01;8.41E-01;5.35E-01;8.53E-03	391;7962;15108;76383	1.71E+00;1.66E+00;1.31E+00;7.24E-02
	Pafah1b2	0.22018	0.998955	4	TTGTACAACTTATAAACACG;AAGATATTCAAGGAGATGAC;GCGACTAAAGAATGGAGAGC;ACAGCTAATGCAGCAGTACG	-0.24;0.13;0.4;0.59	37267;57522;68581;73654	6.17E-01;5.50E-01;4.50E-01;1.36E-01	5980;11053;22112;42367	1.21E+00;1.10E+00;1.07E+00;6.24E-01
	Krt31	0.220079	1.0638	5	CACACGGTTCAGGTCCACGG;GGCCTACTTCAGGACCATTG;GCTCATCCAAGATCCTTCGC;TCAGCTCGATGATCTCGGCT;GCAGATAGATAATGCCAAGC	-0.52;-0.03;0.27;0.57;0.81	22080;49070;63973;73310;76870	6.98E-01;6.68E-01;5.45E-01;4.22E-01;7.67E-02	2764;6324;15661;30564;57554	1.31E+00;1.31E+00;1.17E+00;8.22E-01;7.05E-01
	Btn1a1	0.220071	0.990367	4	GGGAGTCAGCCTTGGCACGA;GGCCGCCGTATACCTCAAAG;TTCTTGGACTCTGACGTGGA;GCGGTACTTCTATACCGGGA	-0.72;0.02;0.04;1.55	14135;51747;52998;79490	5.08E-01;4.04E-01;4.03E-01;3.12E-03	144;26636;27887;65499	2.14E+00;9.52E-01;5.27E-01;3.39E-01
	Uts2	0.219988	0.988202	4	TCTGTACCCCACAGTGCTTG;GTGACGGGAAGGGACAGCAG;CCGTCACGGACACTGGTGAG;ACTGAGACTCCCACTCCACG	-0.21;0.16;0.19;0.74	38545;59128;60321;76146	6.59E-01;5.75E-01;3.75E-01;7.78E-02	3488;19313;20506;41089	1.29E+00;1.15E+00;8.15E-01;6.94E-01
	Lgals12	0.219953	1.003	4	TCTGGCAAAAAGAGATCCGG;TCTCAACAGCCATTTGTGGA;GGGTATCTACCCGTGACAGT;GGCTTGACAGTGTAGAATCG	-0.11;0.0;0.37;0.62	44432;50837;67783;74252	7.15E-01;4.95E-01;4.35E-01;1.22E-01	5382;11851;28798;35201	1.42E+00;1.02E+00;9.18E-01;6.59E-01
	Pkm	0.219871	1.16958	4	TTTCTCTCATGGAACCCATG;TGAAATAGCACATGCCTGTG;GGGCAGAGTCAATGTCCAGG;CTTCCTGACTTCATGCACGT	-0.63;-0.44;0.96;1.0	17415;26246;78061;78315	1.13E+00;5.33E-01;3.80E-01;2.90E-02	1319;1573;53388;62219	2.65E+00;1.20E+00;4.29E-01;4.01E-01
	Tex13b	0.219853	1.02182	4	GAAAGCGAAGCGAACCCCCA;GCACGAGATAGAACGCAAGG;GCACCTCGGTACCGTCCAGG;GTTGATGAACATTAACACCC	-0.53;0.19;0.56;0.66	21645;60466;73061;74848	6.98E-01;5.94E-01;3.77E-01;1.08E-01	4786;6573;19168;57989	1.46E+00;1.37E+00;7.00E-01;5.51E-01
	Zfp36	0.21984	1.02783	4	AAGCGGGCGTTGTCGCTACG;GGAGGAACCGAATCCCTCGG;GAGCTCGGTCTTGTATCGAG;AGTGGCATCGAGAGCCATAG	-0.28;0.22;0.41;0.53	34873;61883;68921;72253	7.45E-01;5.07E-01;4.57E-01;1.69E-01	7381;10713;17751;44760	1.46E+00;1.09E+00;1.00E+00;5.58E-01
	Vmn2r21	0.219644	1.49851	8	GATTCAAGGTATTCTAGCTG;GTAGTCCCAGATGATATTCG;ACTTGGGGCAAATATGGCAA;ATTATTATATGTGTACCTGT;CAGCTATAGCTACCTTCCAA;GTTGAAGACATGGAATCCCA;CTTGGGGCAAATATGGCAAG;AGCTGTAGTTAGGAACTGGG	-0.78;-0.66;-0.37;0.27;0.66;0.76;0.79;1.09	12166;16184;29885;64013;74852;76318;76681;78741	2.05E+00;1.42E+00;1.36E+00;6.43E-01;5.50E-01;5.29E-01;4.17E-01;3.91E-02	893;2953;3316;4782;15621;49749;63450;67468	3.15E+00;2.49E+00;2.07E+00;1.51E+00;1.08E+00;6.30E-01;5.76E-01;4.80E-01
	Prm3	0.21947	0.987983	4	CATGGCCCAGCCCAGAACAC;AAAGTTGTCTTGACTCACAC;TTCCCTGTCATCAGAGGGCG;GCTTCTTCATGGAGGACTCG	-0.54;0.25;0.27;0.89	21426;63230;63813;77643	7.95E-01;3.88E-01;3.76E-01;4.40E-02	1991;15821;16404;58208	1.56E+00;1.03E+00;8.18E-01;5.44E-01
	Gstm6	0.21914	1.01479	4	ATGGACACTCGAATTCAGAT;AGATCAGCTGAAACTCTACT;CTGACTATGACAGAAGCCAG;GTTTCTCCAAAATGTCCACA	-0.2;-0.13;-0.1;1.3	39467;43613;45305;79262	5.95E-01;4.98E-01;4.34E-01;8.11E-03	372;34329;36021;40167	1.73E+00;1.19E+00;6.93E-01;4.43E-01
	Nr2f2	0.21906	1.00209	4	CTACGGCCAGTTCACGTGCG;GGCGCTGAAGAGCATCCGTG;CTCAAAAAGTGCCTCAAAGT;GCAGTTTGCCCTGACCAACG	-0.67;0.08;0.58;0.88	16141;55268;73439;77499	6.13E-01;5.68E-01;3.86E-01;4.72E-02	2135;6195;24366;63493	1.51E+00;1.10E+00;1.01E+00;3.93E-01
	Fanca	0.218976	1.00266	4	TGTGTTAAGATTGTTCCCAG;CAGCTGCAGCAAGAAAACAC;CTCGGGAAAGCAGACGACCA;CCGGTAGGCATCGTAGATCG	-0.32;-0.21;0.64;0.76	32758;38795;74574;76345	6.80E-01;4.74E-01;4.27E-01;7.33E-02	3289;5060;40839;46876	1.67E+00;9.21E-01;8.37E-01;5.80E-01
	Npas4	0.218956	1.17923	4	ACTGGTTAGTGGGTCTGGGA;TCCTTGTATTCACAGCTGAG;ACCTTTCAGAAACGTCCAGT;TGGAGGTGTTGAATCGACAA	0.11;0.18;0.26;0.32	56544;60009;63634;66064	1.16E+00;6.84E-01;3.87E-01;3.25E-01	13570;16000;19625;23090	2.15E+00;1.35E+00;8.11E-01;4.10E-01
	Mrm2	0.218491	1.00218	4	ACATGGCACCGAATGCCACT;CCGCCAAAGGGAATATGTGA;ACAGCAGTGTGTCACTACAG;GCGGTAACTCTCCACCTTTG	-0.08;0.05;0.18;0.72	46233;53748;60088;75804	7.66E-01;5.39E-01;3.75E-01;8.56E-02	3830;19547;25886;33401	1.51E+00;1.03E+00;7.80E-01;6.87E-01
	Olfr1335	0.218481	1.11451	5	GATGCTCTCTGTCATACCCA;GTCAACCACTACTTGTGTGA;GACATAGCCCATATCCAACA;CTATACTGTTATCCTCAACT;GAAGAAAGTATTCAATAAAG	-0.52;0.23;0.23;0.31;0.85	22252;62048;62181;65544;77247	1.18E+00;6.41E-01;4.24E-01;3.91E-01;6.61E-02	2387;14090;17453;17586;57383	2.03E+00;1.19E+00;8.77E-01;7.58E-01;7.12E-01
	Hmgb3	0.218463	1.05918	4	GAAGTGCTCGGAGAGGTGGA;AGATAAAGTCCGATATGATC;TTGTGGATTTGATCTTGGGG;CTTCTTTGTGCAGACATGCA	-0.56;-0.27;0.8;0.9	20429;35194;76836;77715	8.99E-01;4.38E-01;3.75E-01;4.24E-02	1919;2798;44440;59205	2.16E+00;1.05E+00;5.15E-01;5.13E-01
	Bdnf	0.218451	1.27562	4	GGAGAGCGTGAATGGGCCCA;TCCCATGGGTCCGCACACCT;TGTGTGACAGTATTAGCGAG;CGAAGAAAACCATAAGGACG	-1.07;0.53;0.57;0.84	5154;72386;73154;77176	1.39E+00;6.74E-01;5.98E-01;5.44E-02	2457;6480;7248;74480	2.56E+00;1.47E+00;9.49E-01;1.16E-01
	BC030500	0.218377	1.05376	4	AGAGGCAACCCAGTCTGGAC;TCCCACTTGCCTGTAAAGCC;GTCCTGATGGGATCGCAGCG;GGAGTACAAGTCGCCCTGAG	-0.47;0.29;0.51;0.54	24534;64716;71893;72541	8.57E-01;5.43E-01;3.89E-01;1.62E-01	7093;7741;14918;55100	1.67E+00;1.34E+00;6.40E-01;5.70E-01
	Olfr959	0.218346	1.10933	4	GGGGGTATGAAGCCGACTGG;GGAAACACTCGGTACAACCA;CTCGGCATCCCAAACACAGA;TTTGTGCGATCCTGGCCACG	-0.65;0.4;0.51;0.61	16851;68811;71711;74023	1.08E+00;5.37E-01;3.82E-01;1.27E-01	5611;7923;10822;62783	2.06E+00;1.32E+00;6.45E-01;4.13E-01
	4933408B17Rik	0.218307	1.00533	4	ACACGCCCCCTTTAGGTGAG;GCTCGCTACATCCTCTCTCT;TGTAGGAATGACCTAAGCCA;GGCTCAGCAAGACTCAAAAG	-0.66;0.25;0.37;0.92	16252;62983;67760;77822	7.85E-01;4.35E-01;3.86E-01;4.00E-02	1812;11874;16651;63381	1.54E+00;1.07E+00;1.02E+00;3.97E-01
	Rpf2	0.218131	1.26002	4	AATGCCATGCTGATTAAAGG;ATAGACTAGTAAGTGCCCCG;ATTCAATCATATCCAGCACA;GCCGGACGTTCGATACTGTG	-1.12;-0.07;1.01;1.06	4292;46729;78397;78620	1.23E+00;7.39E-01;4.53E-01;2.22E-02	1014;1237;32905;75342	2.85E+00;1.31E+00;7.81E-01;9.62E-02
	Mybpc1	0.218127	1.04525	4	CGTCTGAAGGTTGTTCACAA;GCACACGTTGATCATAGAAG;CAAACCGGATCGGTGAAAGT;CGCAAAGATTCGGACCTCGT	-0.35;0.32;0.35;0.55	30989;65853;67109;72809	9.11E-01;4.50E-01;4.24E-01;1.56E-01	6825;12525;13781;48645	1.77E+00;9.77E-01;8.56E-01;5.82E-01
	Uty	0.218122	0.962118	4	GACCGCGAATTACTGTAACA;ACTGTGAGGACTGATAAAGC;ACAGACATTACAGTCGATCA;TCTGCCTCAGAATTCAAAAG	-0.19;-0.04;0.09;1.0	39992;48704;55767;78361	6.06E-01;4.70E-01;3.85E-01;2.80E-02	1273;23867;30930;39642	1.22E+00;1.21E+00;8.44E-01;5.78E-01
	Gm10256	0.217925	1.96469	16	ATGGCCAGTCTTCTAATGAT;AAATATGAATCAACATCCAG;GAGATGAGTATCCATTACCA;AATACTGGACTAAGAGGACG;CAGCATTCTTAGCATCTGCA;CTGCAAGGCGTCGGAAAGTA;CTAGAAATCTCTCTTCGATG;AGAAGCAATACTGGACTAAG;GCTTCAAGAATTCTGAAATG;CTATGGCAATTACCACTCTC;TGTCAAAGAAATGAATGGAG;CTACCACTTTCAAGTGATGA;AGATGAGTATCCATTACCAA;TCTTAGCATCTGCAAGGCGT;TCATCTCTTCTGGAAGACGC;TTAAAACTTAGTGATCATGC	-0.51;-0.39;-0.26;-0.2;0.02;0.04;0.07;0.15;0.35;0.35;0.41;0.45;0.49;0.55;0.95;1.02	22725;28606;35754;39391;51776;53246;54636;58772;67069;67076;68895;70115;71379;72658;78059;78431	2.31E+00;2.23E+00;1.94E+00;1.66E+00;1.66E+00;1.62E+00;1.60E+00;1.53E+00;1.52E+00;1.52E+00;1.40E+00;1.09E+00;8.23E-01;6.30E-01;5.93E-01;1.06E-01	1203;1575;6976;8255;9519;10739;12558;12565;20862;24998;26388;27858;40242;43880;51028;56909	2.96E+00;2.90E+00;2.51E+00;2.33E+00;2.24E+00;2.23E+00;2.14E+00;2.11E+00;2.10E+00;2.02E+00;1.95E+00;1.58E+00;1.45E+00;1.25E+00;9.42E-01;7.16E-01
	Rbmy	0.217925	1.96469	16	ATGGCCAGTCTTCTAATGAT;AAATATGAATCAACATCCAG;GAGATGAGTATCCATTACCA;AATACTGGACTAAGAGGACG;CAGCATTCTTAGCATCTGCA;CTGCAAGGCGTCGGAAAGTA;CTAGAAATCTCTCTTCGATG;AGAAGCAATACTGGACTAAG;GCTTCAAGAATTCTGAAATG;CTATGGCAATTACCACTCTC;TGTCAAAGAAATGAATGGAG;CTACCACTTTCAAGTGATGA;AGATGAGTATCCATTACCAA;TCTTAGCATCTGCAAGGCGT;TCATCTCTTCTGGAAGACGC;TTAAAACTTAGTGATCATGC	-0.51;-0.39;-0.26;-0.2;0.02;0.04;0.07;0.15;0.35;0.35;0.41;0.45;0.49;0.55;0.95;1.02	22725;28606;35754;39391;51776;53246;54636;58772;67069;67076;68895;70115;71379;72658;78059;78431	2.31E+00;2.23E+00;1.94E+00;1.66E+00;1.66E+00;1.62E+00;1.60E+00;1.53E+00;1.52E+00;1.52E+00;1.40E+00;1.09E+00;8.23E-01;6.30E-01;5.93E-01;1.06E-01	1203;1575;6976;8255;9519;10739;12558;12565;20862;24998;26388;27858;40242;43880;51028;56909	2.96E+00;2.90E+00;2.51E+00;2.33E+00;2.24E+00;2.23E+00;2.14E+00;2.11E+00;2.10E+00;2.02E+00;1.95E+00;1.58E+00;1.45E+00;1.25E+00;9.42E-01;7.16E-01
	Gm21708	0.217925	1.96469	16	ATGGCCAGTCTTCTAATGAT;AAATATGAATCAACATCCAG;GAGATGAGTATCCATTACCA;AATACTGGACTAAGAGGACG;CAGCATTCTTAGCATCTGCA;CTGCAAGGCGTCGGAAAGTA;CTAGAAATCTCTCTTCGATG;AGAAGCAATACTGGACTAAG;GCTTCAAGAATTCTGAAATG;CTATGGCAATTACCACTCTC;TGTCAAAGAAATGAATGGAG;CTACCACTTTCAAGTGATGA;AGATGAGTATCCATTACCAA;TCTTAGCATCTGCAAGGCGT;TCATCTCTTCTGGAAGACGC;TTAAAACTTAGTGATCATGC	-0.51;-0.39;-0.26;-0.2;0.02;0.04;0.07;0.15;0.35;0.35;0.41;0.45;0.49;0.55;0.95;1.02	22725;28606;35754;39391;51776;53246;54636;58772;67069;67076;68895;70115;71379;72658;78059;78431	2.31E+00;2.23E+00;1.94E+00;1.66E+00;1.66E+00;1.62E+00;1.60E+00;1.53E+00;1.52E+00;1.52E+00;1.40E+00;1.09E+00;8.23E-01;6.30E-01;5.93E-01;1.06E-01	1203;1575;6976;8255;9519;10739;12558;12565;20862;24998;26388;27858;40242;43880;51028;56909	2.96E+00;2.90E+00;2.51E+00;2.33E+00;2.24E+00;2.23E+00;2.14E+00;2.11E+00;2.10E+00;2.02E+00;1.95E+00;1.58E+00;1.45E+00;1.25E+00;9.42E-01;7.16E-01
	Gm10352	0.217925	1.96469	16	ATGGCCAGTCTTCTAATGAT;AAATATGAATCAACATCCAG;GAGATGAGTATCCATTACCA;AATACTGGACTAAGAGGACG;CAGCATTCTTAGCATCTGCA;CTGCAAGGCGTCGGAAAGTA;CTAGAAATCTCTCTTCGATG;AGAAGCAATACTGGACTAAG;GCTTCAAGAATTCTGAAATG;CTATGGCAATTACCACTCTC;TGTCAAAGAAATGAATGGAG;CTACCACTTTCAAGTGATGA;AGATGAGTATCCATTACCAA;TCTTAGCATCTGCAAGGCGT;TCATCTCTTCTGGAAGACGC;TTAAAACTTAGTGATCATGC	-0.51;-0.39;-0.26;-0.2;0.02;0.04;0.07;0.15;0.35;0.35;0.41;0.45;0.49;0.55;0.95;1.02	22725;28606;35754;39391;51776;53246;54636;58772;67069;67076;68895;70115;71379;72658;78059;78431	2.31E+00;2.23E+00;1.94E+00;1.66E+00;1.66E+00;1.62E+00;1.60E+00;1.53E+00;1.52E+00;1.52E+00;1.40E+00;1.09E+00;8.23E-01;6.30E-01;5.93E-01;1.06E-01	1203;1575;6976;8255;9519;10739;12558;12565;20862;24998;26388;27858;40242;43880;51028;56909	2.96E+00;2.90E+00;2.51E+00;2.33E+00;2.24E+00;2.23E+00;2.14E+00;2.11E+00;2.10E+00;2.02E+00;1.95E+00;1.58E+00;1.45E+00;1.25E+00;9.42E-01;7.16E-01
	Apip	0.2177	0.956875	4	CATCACAGCAGCTTTAGAGT;ACACATCAAGAGATGATCAA;GAAATCTACATTGCTCCCTC;GTTCTGGGATCAGGAATCGG	-0.51;0.17;0.24;0.97	22863;59488;62539;78164	6.69E-01;3.81E-01;3.81E-01;3.23E-02	1470;17094;20145;56771	1.32E+00;1.16E+00;7.68E-01;5.88E-01
	Reep6	0.217225	1.03904	4	GCACTCACGAAGCATATGCG;AGAGAAGCGGTATCTCGCCG;GAATTCGACCAGACCGAACA;CCTTGCCCGCGTAGTAGAAA	-0.03;0.0;0.37;0.53	49073;50937;67737;72235	8.56E-01;4.97E-01;4.34E-01;1.69E-01	7399;11897;28697;30561	1.66E+00;1.01E+00;9.22E-01;5.57E-01
	Rrp1b	0.217078	1.03796	4	CGCTGGTACAGACTGTAGCG;CCTCCAAGCTGTTTACAACG;CGAATCCGGTACTTTGGGCA;AGTTCTCAAGCGGAATGCCT	-0.15;0.15;0.39;0.47	42484;58558;68402;70884	6.64E-01;6.44E-01;4.47E-01;2.02E-01	8750;11232;21076;37150	1.32E+00;1.26E+00;1.06E+00;5.09E-01
	NO_CURRENT_267	0.216851	1.00116	4	TGATCAACGTCGGTGGACGG;TGATCCCCGTCCCGAAGTTA;TGATAAACGATGCGAACTCG;TGAGGTTACCGCCGGCTTTT	-0.11;0.01;0.36;0.61	44748;51457;67261;74001	7.24E-01;5.04E-01;4.27E-01;1.27E-01	5633;12373;28177;34886	1.43E+00;9.86E-01;9.41E-01;6.44E-01
	2210016L21Rik	0.216801	0.933273	4	CTGTGCGTGTTGTAGGCATG;ATTGGCACGCTGTCGCGAGG;GCAGCGGAGAGACCCGAAGC;CTTCCTTCTTATGGCCTCCG	-0.54;-0.02;0.34;1.09	21196;49415;66864;78744	4.78E-01;4.21E-01;3.76E-01;1.95E-02	890;12768;30219;58438	1.36E+00;9.64E-01;8.68E-01;5.38E-01
	Fam104a	0.21673	1.11817	4	CAGCTCCGACTGTTCGCTGT;GCCCGCAGCAACCACCCGCG;GAGCTCAGACCCGTGCGGGT;CCAGGACTCCTGGGACACAG	-0.87;0.18;0.76;0.81	9289;59905;76312;76840	8.33E-01;6.81E-01;4.93E-01;6.20E-02	2794;3322;19729;70345	2.02E+00;1.34E+00;8.99E-01;2.15E-01
	Ccr3	0.216569	0.98286	4	CTGCAGTCCTCGCTATCCAG;CCACACCCTATGAATATGAG;ATCACCAGTATCATTACCTG;AGTAGCAGATAACCATAATG	-0.13;-0.07;0.05;1.01	43607;46795;53638;78415	6.93E-01;4.53E-01;3.99E-01;2.68E-02	1219;25996;32839;36027	1.38E+00;1.23E+00;7.83E-01;5.37E-01
	Matn1	0.216471	0.971974	4	GCTGGCCAAGAAGTTCCAAG;GTTGACCAAGCCCACCCTCG;GCAGCGTAGCCTTGTCCACG;TCGACGGATCCAAGAGCGTG	-0.22;0.13;0.15;0.81	38266;57451;58402;76887	6.16E-01;5.70E-01;3.76E-01;6.10E-02	2747;21232;22183;41371	1.20E+00;1.14E+00;9.06E-01;6.39E-01
	Cct8	0.216419	1.05251	4	AACCATGCCATGTAATACTG;TCATGGTTTAGGTAATATCG;CCTTCACCTGAGCATCCATG;AGACGACTCTGTAAAACAGT	-0.58;-0.28;0.79;0.93	19728;34978;76693;77891	8.80E-01;4.39E-01;3.75E-01;3.84E-02	1743;2941;44642;59906	2.12E+00;1.09E+00;5.09E-01;4.95E-01
	Ccnt1	0.216154	0.97081	4	GCAGCTTCGAGTTTAAACGG;GAAACGTATTCGGAATTGGA;TGTGTACTGCAGGCTAAATG;GGAGTACCGTGCAAAGCACG	-0.12;-0.05;0.13;0.91	43797;48197;57466;77741	6.98E-01;4.65E-01;3.78E-01;4.18E-02	1893;22168;31437;35837	1.39E+00;1.05E+00;8.27E-01;6.16E-01
	Nipal1	0.216022	1.03111	4	GGAACGGAAGCCTGTTTACA;CTCTTGCAACTGGCCGACAA;GGTTATCCACGCCCCACAAG;GAACGCTCAGAGCCCCCAGT	-0.67;0.24;0.53;0.77	15947;62768;72198;76424	7.77E-01;5.55E-01;3.87E-01;7.15E-02	3210;7436;16866;63687	1.52E+00;1.37E+00;8.46E-01;3.88E-01
	Slco4c1	0.215983	0.975538	4	AGAGAGGACACAAACCTCGC;ACAAAGATACGTGCTTAACA;TTTCCCCTTAGAATTTGATG;TTATAGTTCGGATCTGACTG	-0.48;0.04;0.56;0.74	24086;53215;73017;76080	5.91E-01;5.30E-01;3.87E-01;7.93E-02	3554;6617;26419;55548	1.46E+00;1.01E+00;8.08E-01;6.26E-01
	Prkd3	0.215964	0.979001	4	GATAAACAATGGAGCACACG;CTGAACCTGACAGTTAGACA;CCAGTAAGAGAATCCCGTCG;TGAAATCATCACCGATACCG	-0.24;0.02;0.46;0.62	37232;51918;70415;74276	5.49E-01;5.10E-01;4.95E-01;1.21E-01	5358;9219;27716;42402	1.20E+00;1.09E+00;9.59E-01;6.61E-01
	Adcy7	0.215641	0.977401	4	GTCGTGTACCTACCTATCAG;CCATGTCTAGCACTCAACTG;CTCCGGGAATGTGCTATGTG;GCACGGAGCCTAGTACCATG	-0.23;0.06;0.41;0.63	37446;54268;68873;74334	5.53E-01;5.49E-01;4.56E-01;1.20E-01	5300;10761;25366;42188	1.10E+00;1.09E+00;1.06E+00;6.64E-01
	4933412E24Rik	0.215634	0.991833	4	GGGAGAGCTTTCCATCAATG;ACACTCAAATGTCCAGACCA;CAAAGGCAGCAAGCTCACGT;GCAGATCTTGGGTCACCCCG	-0.45;-0.04;0.65;0.7	25581;48653;74719;75543	6.91E-01;4.70E-01;3.96E-01;9.16E-02	4091;4915;30981;54053	1.70E+00;8.42E-01;7.56E-01;6.73E-01
	Eln	0.215602	1.00625	4	CCTGGATAATAGACTCCACC;CTTTGATGGGATAACCCAGT;GGTGGCTTAGGAGTCTCGAC;GGCATCCCGACATATGGGGT	-0.61;0.26;0.41;0.8	18437;63667;68922;76764	8.12E-01;4.57E-01;3.76E-01;6.37E-02	2870;10712;15967;61197	1.59E+00;1.09E+00;8.89E-01;4.57E-01
	Klhdc9	0.215523	1.00924	4	GAAGGACGGTTCTATCTGGT;CCTTCGCAGCCACCACGACG;GTCACGTCGCTTATCCACGG;CTGCAACTCAGTTGGACCGG	-0.21;0.18;0.34;0.55	38646;59982;66730;72838	6.83E-01;5.77E-01;4.19E-01;1.55E-01	6796;12905;19652;40988	1.34E+00;1.15E+00;9.56E-01;5.83E-01
	Knstrn	0.215509	1.02402	4	GTTTAATAAGCAAAAACCGG;GCCAAGCCACCCGGCTACGA;CGCGGCGGCAGACTCTAACG;GGGCGCGGCTCCGAGTCTGT	-0.05;0.03;0.32;0.56	47998;52704;65942;72939	8.21E-01;5.22E-01;4.08E-01;1.53E-01	6695;13693;26930;31636	1.60E+00;9.90E-01;9.15E-01;5.88E-01
	Ccdc9	0.215403	1.02714	4	CTGGATGATCCCCGACGTCG;GATAACACTCACCATAGCGG;GGCTCTTCGTCGGAAGAATG;TCTGATCGAAAGTCTAAGGT	-0.1;0.14;0.28;0.54	45245;58230;64280;72464	7.38E-01;6.35E-01;3.92E-01;1.64E-01	7170;15353;21404;34389	1.46E+00;1.25E+00;8.38E-01;5.66E-01
	Vmn2r2	0.215322	1.12634	4	CTTCCAGCACAAATGGGCCG;AGCACTGGGAAATATCTCGT;TTGCTTATGGAGAGGCACTG;TTTGAATGGAGATGTAGGCA	-0.58;0.45;0.46;0.53	19537;70326;70559;72168	1.19E+00;4.99E-01;3.75E-01;1.71E-01	7466;9075;9308;60097	2.25E+00;1.21E+00;5.54E-01;4.89E-01
	Paics	0.215266	1.11173	4	TCAACCAGCGTACAGTCCTG;GTGGGTTGCAGACCGAGTGG;TTCGGCACACCCACTCAATG;ATGCCAATAATGATCCACAG	0.02;0.15;0.31;0.38	52083;58640;65592;67909	9.65E-01;6.46E-01;4.04E-01;2.77E-01	11725;14042;20993;27551	1.84E+00;1.27E+00;8.98E-01;4.37E-01
	Vmn1r237	0.215196	0.989256	4	CAAAGGCAGACACAGTATGG;GGCCCAACTCATGTACACAC;TTCTACTGTTCATCATAACA;ATCTGATGCTTTACTACATG	-0.39;0.26;0.28;0.71	28943;63359;64304;75673	8.00E-01;4.26E-01;3.92E-01;8.86E-02	3961;15330;16275;50691	1.57E+00;8.39E-01;7.85E-01;7.68E-01
	Rps27a	0.215076	0.980276	4	GAACAAGCATAAGAGGAAGA;CTGGTGTTGAGACTTCGGGG;GGCCCGTACCTCGAGCGTGA;GTAAGCAGCTGGAAGATGGC	-0.16;-0.12;0.46;0.69	41601;44102;70351;75287	6.43E-01;4.93E-01;4.36E-01;9.75E-02	4347;9283;35526;38014	1.28E+00;1.20E+00;7.34E-01;7.06E-01
	Klhl23	0.214856	1.04257	4	TAATACCTGGCATTGAGCAT;GAGCCGTCTTTAAGTACACT;GCCTCCAATGATATACATGG;CAATGGAAGATTATGCCTGA	-0.7;0.03;0.73;0.8	14792;52260;76009;76810	8.01E-01;5.15E-01;3.97E-01;6.27E-02	2824;3625;27374;64842	1.95E+00;9.72E-01;8.95E-01;3.57E-01
	Atp6v0d1	0.214578	1.00299	4	TACTTGGAGGGATTAGTGCG;TCGATGACTGACACCGTCAG;TGGTGATGATGAAAGCGCGG;CAAGTTCAGCTATTGAACGC	-0.96;-0.08;0.26;1.64	7145;46554;63611;79525	5.67E-01;4.51E-01;3.87E-01;2.36E-03	109;16023;33081;72490	2.26E+00;8.10E-01;7.76E-01;1.63E-01
	Rubcn	0.214544	1.10108	4	CAAACTGCCAGTAATCAGCC;ATGTTTAGAAGACCATCAGA;CACTCTGACTAGCCCCCTAG;ATGTAGACGCTGACATCCGG	0.01;0.15;0.31;0.39	51189;58727;65629;68254	9.31E-01;6.48E-01;4.05E-01;2.68E-01	11380;14005;20907;28445	1.79E+00;1.27E+00;8.99E-01;4.44E-01
	Rbks	0.21423	0.921501	4	CCGCACTAACCTGACCAGGT;AAAGGCGGCCATAGTCTGCA;TTCATTATTGACAATTATGG;CAATAAAAAACTCATGTCCA	-0.37;-0.01;0.26;0.98	29742;50337;63328;78232	4.89E-01;4.35E-01;3.85E-01;3.08E-02	1402;16306;29297;49892	1.18E+00;9.00E-01;8.12E-01;7.98E-01
	Prss45	0.214201	1.12855	4	TGGACCCTGAAGATTCCCGT;GAGAACTACACCGAACCAGG;CCACCCAGCTTCGATCAATG;AAGGAGTACTCAGTGATGTT	-0.78;0.41;0.54;0.68	12157;69173;72457;75220	1.11E+00;5.66E-01;4.30E-01;9.90E-02	4414;7177;10461;67477	2.10E+00;1.39E+00;7.28E-01;2.88E-01
	Hdac4	0.213981	0.954766	4	TGTGGCTGCCAAATGACACA;TCACTTACCCATACCAGTAG;CTTCTGTCTACAGACGAGCT;CCTACCTAGATCGGCTACCT	-0.37;0.16;0.28;0.78	30160;58893;64489;76568	6.52E-01;4.40E-01;3.94E-01;6.82E-02	3066;15145;20740;49474	1.28E+00;8.64E-01;8.47E-01;8.27E-01
	Alkbh4	0.213721	0.998236	4	AGAGAATGGGCCTTTACCCG;AAGCATCAGGTCTGACGGAG;TTGGACGACGCCTGGCTGTG;CTGGACTACAGCCCTGAGCG	-0.6;0.26;0.39;0.81	18790;63445;68348;76855	8.03E-01;4.46E-01;3.76E-01;6.17E-02	2779;11286;16189;60844	1.57E+00;1.05E+00;9.01E-01;4.68E-01
	Gpalpp1	0.21371	0.955229	4	CAAGGAGCACGCGACAGTTG;AAATGAAAGAATTTGGTCTG;AATGAAACCAGGTGGCAATG;CTTCTTAAACCCAGGAGGAA	-0.27;0.08;0.08;0.97	35382;54986;55197;78132	5.62E-01;5.16E-01;3.89E-01;3.31E-02	1502;24437;24647;44252	1.15E+00;1.09E+00;1.02E+00;5.66E-01
	Frzb	0.213679	1.04316	4	TGGCGGTACTTGATGAGAAT;TGGCCATGGAACAGTTCGAA;TGGGTGCGTACATTGCACAG;GAGCTGCCGGTGTACGACCG	0.01;0.06;0.17;0.62	51521;53953;59566;74121	9.44E-01;5.43E-01;3.75E-01;1.25E-01	5513;20068;25681;28113	1.81E+00;1.04E+00;6.71E-01;6.51E-01
	Magi2	0.213615	0.983978	4	ACATTGTCGTCATGGACGGG;CTCAACCTAAGATTTCAGAA;AGTTCCTTATAATCTGGACC;TCTTTAATCATCCATCGAGG	-0.41;0.06;0.57;0.64	27874;53881;73119;74549	5.96E-01;5.42E-01;4.15E-01;1.15E-01	5085;6515;25753;51760	1.47E+00;1.04E+00;7.48E-01;6.79E-01
	Lrrc3	0.213572	0.954256	4	GTGGCAGGCAATTTCATCCA;TCGCATCCGAAGAATTCCAA;GGTGTTGGAAGGCTCCATTG;CCTGTCCCATAATGCCATTG	-0.28;-0.02;0.45;0.71	34820;49689;70108;75636	5.06E-01;4.86E-01;4.81E-01;8.95E-02	3998;9526;29945;44814	1.18E+00;9.99E-01;8.77E-01;7.64E-01
	Sycn	0.213432	1.0261	4	GCAGTGTTAGACCAGCCCGA;ACTATGACAACTGCTGCCAG;CAGACCTGAAGAAGTCAGAT;GGGCACCGGGCAATTGCCAT	-0.0;0.03;0.16;0.67	50572;52643;58865;75040	9.08E-01;5.21E-01;3.75E-01;1.03E-01	4594;20769;26991;29062	1.75E+00;9.87E-01;7.14E-01;6.52E-01
	Cr2	0.213353	1.05864	4	AGACGGATTTCTATAAACCA;CTATACATTGCACCCCTGAG;ATGCAATGCTCATGGCACAT;ATGTTGACCAGTTTGTTGCG	-0.15;0.24;0.32;0.44	42495;62564;66036;69895	7.69E-01;6.65E-01;4.10E-01;2.27E-01	9739;13598;17070;37140	1.51E+00;1.33E+00;9.20E-01;4.80E-01
	Zfp945	0.213303	1.10186	5	AATGTCTTGACTGTGCTCAG;ACGGTAATGGCATTCACGGT;ACGATGACCTCAAGCCTGAG;AGTTCTAAGAAGGCATCTCT;TCTGTTTGATGATTCAATGG	-0.56;0.2;0.27;0.3;0.85	20585;60834;63946;65248;77271	1.11E+00;6.97E-01;4.08E-01;3.90E-01;6.54E-02	2363;14386;15688;18800;59049	1.93E+00;1.31E+00;8.81E-01;7.46E-01;6.49E-01
	Reep2	0.213291	0.975974	4	CCTGACTCTCATTCGAGATG;CGTGAAGACCAAAAACGTGA;GGACAACAGCCATATCACAA;GTGTTGGGTGCACGAACTTG	-0.13;0.04;0.15;0.79	43617;53010;58507;76705	6.93E-01;5.27E-01;3.76E-01;6.51E-02	2928;21127;26625;36017	1.38E+00;1.00E+00;8.81E-01;6.42E-01
	Ccl24	0.213244	1.04856	4	GCCCAGAAGTCTCACCTATG;TCTGAACCCACAGCAGCTTG;CCGAGTGGTTAGCTACCAGT;GGGGAAGATGCAACACGCGC	-0.03;0.16;0.16;0.57	48865;58971;59045;73185	8.49E-01;6.55E-01;3.75E-01;1.47E-01	6449;20589;20663;30769	1.65E+00;1.29E+00;6.57E-01;6.00E-01
	Rab43	0.213006	1.10859	4	AGACCTTGCCGATTTCCGGG;GTGGTGCAGCGCTTCAAGAC;TCTTGCTGATGTCGTACGCA;CTCACATCCTCGATCCAGTG	0.04;0.17;0.22;0.42	53147;59393;61872;69387	1.01E+00;6.66E-01;3.78E-01;2.39E-01	10247;17763;20241;26487	1.91E+00;1.31E+00;7.44E-01;4.68E-01
	Gm1553	0.212763	0.993011	4	CATTATCAGTAGACGTGTAT;TTCATCATTAGGGTCTGCAG;AACACTGTTTAGGGCTTCAG;GCCCTAAACAGTGTTTGGAG	-0.27;-0.14;0.61;0.66	35442;42650;73982;74810	6.43E-01;5.17E-01;4.30E-01;1.09E-01	4824;5652;36984;44192	1.58E+00;1.02E+00;6.97E-01;6.68E-01
	Tlx3	0.212672	0.920795	4	TGAAGCGGTCCTTTACAAAG;CGCTGGCACCCGGATCACGC;ACCCGGGAAAAGGACGTGCG;GGCGCGCCCTTCGAGGACGC	-0.38;-0.13;0.34;1.02	29188;43259;66737;78463	4.32E-01;4.29E-01;4.19E-01;2.57E-02	1171;12897;36375;50447	1.25E+00;9.57E-01;7.93E-01;6.84E-01
	Chd2	0.212598	1.03427	4	GCAGTTCCACTAAAAAGGTG;TTATCTGATCAAAGCTCCCG;TATTATGAATCAGCTCCCCC;GTCTTATATTCACAGCACAT	-0.05;0.13;0.22;0.55	48042;57595;61585;72864	8.22E-01;6.19E-01;3.77E-01;1.54E-01	6770;18049;22039;31592	1.61E+00;1.21E+00;7.34E-01;5.84E-01
	Olfr221	0.212524	0.935072	4	AATGAGATAGCACTCGCTGG;ACTATGGTCGGATAGAGGAG;TTTCTGCTACTCTTCTACGG;ACACAGCGAAGTGTCCACGC	-0.4;-0.13;0.47;0.91	28006;43713;70842;77746	5.07E-01;4.34E-01;4.16E-01;4.17E-02	1888;8792;35920;51629	1.24E+00;1.05E+00;7.53E-01;6.96E-01
	Leprotl1	0.212478	0.94319	4	CTGGCTATGCAGTACGGGAT;CACCACAGGCATCGTCGTCT;CAGAAGATTAGTGGATGACA;GACGTACTTGTATATCGGAA	-0.23;0.03;0.21;0.83	37857;52560;61473;77101	5.61E-01;5.20E-01;3.77E-01;5.61E-02	2533;18161;27074;41777	1.12E+00;9.84E-01;9.37E-01;7.31E-01
	Ccer1	0.212406	1.03433	4	CCTGGTCCTCCTACCATCGA;TTCCTCGGAAAGGAGCGACG;GCCCGGTCAACCTTTCCGGG;TCTTCTTCGACGCCGCTGTG	-0.1;0.16;0.29;0.5	45233;59028;64855;71435	7.37E-01;6.56E-01;3.97E-01;1.89E-01	8199;14779;20606;34401	1.46E+00;1.29E+00;8.63E-01;5.27E-01
	Ash2l	0.212077	1.14541	4	TTACACACCTCGATCATGTA;TGCAATGTGTGCCATCACAG;GCTCCGGAGAGGCCGAAAGT;CAATAACATTGTCAAAACAA	0.08;0.14;0.31;0.32	55131;57965;65524;65913	1.09E+00;6.28E-01;4.04E-01;3.28E-01	13722;14110;21669;24503	2.05E+00;1.23E+00;8.94E-01;4.08E-01
	Fcgr2b	0.212033	0.965501	4	AGGTCCCGACTTACTTAGCA;TTCCAGAAACACCAGCTGAG;ACTGCAAAGGAAGTCTAGGA;CGGTGACACTGACATGCGAA	-0.69;0.09;0.42;1.03	15219;55556;69427;78479	5.74E-01;4.69E-01;3.93E-01;2.54E-02	1155;10207;24079;64415	1.26E+00;1.13E+00;1.11E+00;3.68E-01
	Imp3	0.211927	1.04302	4	CTACAACCAGCTGAGCCGAG;GGAACTCTGCGACTCCGTCT;TTTGCTCCTCAAGCTACGCA;GCAGCACACGCAGTTCGTGG	-0.72;-0.16;0.76;0.97	14024;41432;76394;78170	8.43E-01;4.27E-01;4.05E-01;3.22E-02	1464;3240;38202;65607	2.04E+00;1.16E+00;6.39E-01;3.37E-01
	Fam189a1	0.211805	0.925319	4	TCACTTACCACAAGCGAGAG;TGTGGCCAAGGCACACACAA;GCATCCGAGCGCCATCTGCG;GTGTACAGGTGTACTCTGGA	-0.36;-0.01;0.36;0.86	30319;50474;67376;77311	4.91E-01;4.42E-01;4.28E-01;5.14E-02	2323;12258;29160;49316	9.92E-01;9.72E-01;9.05E-01;8.32E-01
	5530400C23Rik	0.21179	1.07191	5	CAAGAGCATTGTGACTCCAC;TGTGCTTACTGGGTATTGGT;TAGAAAAAGAAATGTAGTGG;TCATTCCCAGAGTTGGACGA;TAGTCCTGAGCTCAGCTCAG	-0.54;0.12;0.25;0.44;0.78	21464;57176;62978;70039;76586	9.37E-01;6.65E-01;4.43E-01;4.16E-01;8.47E-02	3048;9595;16656;22458;58170	1.64E+00;1.24E+00;1.01E+00;7.86E-01;6.82E-01
	Dydc2	0.211693	1.07998	4	AGGTACTCTATTGGGTCACT;GAAGTGTGAAAAGTGTCACC;CTTTGGAACCGGCCTGACCC;TAGGAGTATAACTGTAGCTG	-0.65;0.37;0.5;0.63	16726;67709;71597;74291	1.01E+00;5.33E-01;3.83E-01;1.21E-01	5343;8037;11925;62908	1.94E+00;1.31E+00;6.62E-01;4.10E-01
	Fndc3c1	0.211434	0.973447	4	TCCTGATGTATAGAAGACTG;ACCATTGCTCACATACCCAC;TCTGAGGCCATCATTTATCG;ACGTGGTAAAACCAAGAGCA	-0.13;0.02;0.11;0.84	43643;52250;56598;77159	6.94E-01;5.15E-01;3.82E-01;5.48E-02	2475;23036;27384;35991	1.38E+00;9.72E-01;9.47E-01;5.96E-01
	Ube2m	0.211384	1.01539	4	TCATCCCAACATTGACCTCG;TTACCCACATGACCCTCCCA;GCGCAGCTCCGGATTCAGAA;TTCCAGGGCTTCTACAAAAG	-0.66;0.11;0.64;0.75	16450;56398;74630;76241	6.84E-01;5.91E-01;3.84E-01;7.56E-02	3393;5004;23236;63184	1.68E+00;1.15E+00;8.25E-01;4.02E-01
	Trim36	0.211361	0.978886	4	ATCGACAAGATTAACAGACC;TAGAGAATAACGGGCTCGTG;TAACATATCGAAACAAACAG;GATTGTCGAGAGATACCGGC	-0.38;-0.07;0.62;0.68	29281;46942;74158;75150	6.53E-01;4.54E-01;4.30E-01;1.01E-01	4484;5476;32695;50353	1.61E+00;7.96E-01;7.87E-01;7.23E-01
	Lrp6	0.211304	0.961961	4	TTGCCTTAGATCCATCAAGT;GTTGTTCATCAATCACCATG;TGTGTCCTCAAATAACGTCA;GGATCTAACACGATAGCCCG	-0.69;0.12;0.22;1.2	15282;57037;61673;79069	6.06E-01;3.92E-01;3.78E-01;1.23E-02	565;17961;22596;64352	1.56E+00;1.18E+00;7.37E-01;3.70E-01
	Stfa2	0.21125	0.926159	4	AATCTCCTGGATTTCTGATG;AATCCAGGAGATTGCTGACA;TACACCATAGAAATAATTGG;TTTCAGATGAATGTAGGACG	-0.32;-0.14;0.38;0.92	32671;43138;68088;77824	4.73E-01;4.41E-01;4.32E-01;3.99E-02	1810;11546;36496;46963	1.07E+00;1.04E+00;9.17E-01;6.81E-01
	Lrrc18	0.210777	0.935612	4	TGAGCCGCAAGATACACTTG;TAGATGAGCTAGATCTTAGC;TCATCTGGCCAATGGATTCA;CAAAAAGATCACCCTTAATG	-0.59;-0.22;0.17;1.47	19247;38419;59615;79441	4.27E-01;3.75E-01;3.75E-01;4.19E-03	193;20019;41215;60388	2.02E+00;6.73E-01;5.73E-01;4.81E-01
	Spred1	0.210521	0.930829	4	GAAGTATGGAATATGTACAG;TCAAAAACTGAGGCTGAAGG;GGTGGATGGCTACCACTCGG;CGACGTATTAAGATATCTCG	-0.29;-0.13;0.39;0.87	34501;43208;68520;77425	5.01E-01;4.49E-01;4.32E-01;4.88E-02	2209;11114;36425;45133	1.06E+00;9.91E-01;9.86E-01;6.83E-01
	Zic4	0.210193	0.932781	4	GCTGGTCACGCACGTCACTG;CATGCCGCCATAACCGTGCA;TCCCTGGAGACATGTATGCG;GCTCATCTGCAAGTGGCTAG	-0.22;-0.07;0.16;0.97	38074;46949;58799;78192	5.66E-01;4.54E-01;3.75E-01;3.17E-02	1442;20835;32685;41560	1.16E+00;1.13E+00;7.88E-01;6.50E-01
	Psmd14	0.210082	0.989163	4	ATTAGCATTGATCAGTCTGA;AGACAAACGACTTCAAATCT;ATTAGACCCATAACTTCCAT;ATATGCTGAAACAAACAGGA	-0.9;-0.0;0.21;1.53	8719;50710;61131;79483	5.10E-01;4.94E-01;3.76E-01;3.28E-03	151;18503;28924;70914	2.12E+00;9.13E-01;7.19E-01;2.01E-01
	Golph3	0.210069	1.04928	4	CTTGTCGGCAGCGTTCCGGG;CGACGACAAGGGCGACTCCA;GGAACGATTAGCTAAAAACC;TGTATATCATCTGGATTACG	0.02;0.08;0.11;0.63	52130;55009;56413;74431	9.67E-01;5.63E-01;3.82E-01;1.17E-01	5203;23221;24625;27504	1.85E+00;1.09E+00;6.71E-01;5.92E-01
	Zfp872	0.20991	1.04079	4	CGTGGTTTCGAAACAAGCTG;GTTCATTTAGAATACATGAG;CTGCATGTGCCTCTTAAGAG;AAACCTTTCAGTTACATGAG	-0.44;0.32;0.44;0.53	25963;65778;69926;72202	9.07E-01;4.81E-01;3.99E-01;1.70E-01	7432;9707;13856;53671	1.76E+00;1.16E+00;6.85E-01;5.56E-01
	Pld4	0.209776	0.974036	4	GATGGGCGACACATCTACGT;CAGTCATCGGATGTTCCCTG;GCTATGTGGATCATGAGATG;AGTGAGGGACCAGTAGTACG	-0.26;-0.06;0.53;0.62	36090;47516;72368;74227	5.62E-01;5.28E-01;4.59E-01;1.22E-01	5407;7266;32118;43545	1.38E+00;1.05E+00;8.05E-01;6.58E-01
	Tcp11l2	0.209742	0.945262	4	GCAGCAACAAGCCCTCCCCG;GAAAGCTACCACCAACATCG;CAACAGGTTACCTGTTCTCG;CAGTTATTAAGCACCAACAG	-0.53;0.11;0.42;0.84	21640;56595;69233;77221	5.96E-01;4.64E-01;3.77E-01;5.34E-02	2413;10401;23039;57994	1.16E+00;1.11E+00;9.57E-01;5.51E-01
	Vgll3	0.209598	0.917967	4	CACGCTTCCCAGCAAACAAG;AGAGTTAAGGTACTCCATCT;CAAGACTCAGACGCAGTGGG;GGGCTAACCCCCCTATGGCG	-0.49;-0.01;0.36;0.97	23884;50224;67468;78174	4.87E-01;4.30E-01;3.85E-01;3.21E-02	1460;12166;29410;55750	1.16E+00;9.98E-01;8.96E-01;6.19E-01
	Ifi202b	0.209584	1.0564	4	GTGAGTACCATCACTGTCAT;GGGAAACCAATATTACACTC;CCACAAAGGTCCCAAACAAG;CTTGAGGTTGATCCTCCCCA	0.03;0.09;0.1;0.62	52341;55857;56052;74178	9.75E-01;5.80E-01;3.84E-01;1.23E-01	5456;23581;23777;27292	1.86E+00;1.13E+00;6.55E-01;5.84E-01
	NO_CURRENT_185	0.209496	1.01536	4	GCGTGACGTCCCACCCTGAG;GCGTGAGATTCGTTGCTCGA;GCGTGCCATGGGAGGCCGTT;GCGTGACGCGATCAAACGGT	-0.63;0.24;0.53;0.7	17716;62467;72180;75556	7.66E-01;5.55E-01;3.79E-01;9.13E-02	4078;7454;17167;61918	1.50E+00;1.36E+00;7.57E-01;4.37E-01
	Tmem239	0.209382	0.988513	4	ATGTCACGCACTCTTCACCA;GCTGGCGGCAACCACTACAG;AGTGGAGTCGGATATCATCG;GAGCTCGCTATGGCCCGTGG	-0.46;0.21;0.45;0.63	25345;61467;70197;74399	7.30E-01;4.89E-01;3.94E-01;1.18E-01	5235;9437;18167;54289	1.44E+00;1.18E+00;6.69E-01;6.66E-01
	Zfp160	0.209351	1.00125	4	TGCACAGAGAGCTTTGCACA;GAGTTCTACGATGAATTGTG;TCACACCTAGCTAGTCACCG;GAAGCTAAGTCCATCAGCAG	-0.12;0.09;0.31;0.55	44341;55423;65678;72835	7.12E-01;5.71E-01;4.05E-01;1.55E-01	6799;13956;24211;35293	1.41E+00;1.11E+00;9.02E-01;5.83E-01
	Olfr273	0.20914	0.94581	4	GGCCATATTTGATATGACCA;TTAGGCTCACCAATGTTGAA;GCTGCCAGAGAACCATGATG;CTAGTGATTCTAACTGGCAA	-0.27;0.11;0.23;0.77	35261;56474;62411;76436	5.93E-01;5.14E-01;3.80E-01;7.12E-02	3198;17223;23160;44373	1.16E+00;1.02E+00;8.48E-01;7.63E-01
	Kctd7	0.209074	1.01888	4	CCGCAGAGTAGACAAGCGCG;GAGAACATGCAGCCACTGAA;CGGTACTTCATCGATCGAGA;GTAATGCCGCCCGCTGAACA	-0.79;-0.14;0.67;1.1	11760;42980;74996;78772	7.11E-01;4.37E-01;4.31E-01;1.89E-02	862;4638;36654;67874	1.74E+00;1.38E+00;6.77E-01;2.78E-01
	Spata2l	0.208892	0.968974	4	GAAGATGGGCTACGTGCGCA;TACAAGCGTACTACCAGCCG;TGTATGGTGAGCCTTCCCCA;GCCAAACTATGGGGTTCTGG	-0.3;0.1;0.44;0.6	33647;55978;69795;73880	5.82E-01;4.87E-01;4.78E-01;1.30E-01	5754;9839;23656;45985	1.15E+00;1.13E+00;9.54E-01;6.37E-01
	Ccdc115	0.208682	0.975714	4	ACAGCTGCTCAGTGACCTGG;AGCTGACGCCCAGACCCCCG;GACCTGAGGCTCCATACGCG;CTAACTCTTTGGTCTTGGTG	-0.13;0.08;0.2;0.69	43307;55016;60772;75402	6.85E-01;5.63E-01;3.76E-01;9.48E-02	4232;18862;24618;36327	1.36E+00;1.09E+00;7.44E-01;7.08E-01
	Il1f9	0.208678	1.02374	4	GAGACTCTGGGTACTTGCAT;AGATGGAACACGAGAGAGCT;GCTTCGTGGAACTGTCACAA;ACACCCTACTTTGCTGCTAA	-0.55;0.22;0.57;0.59	20919;61776;73232;73677	7.41E-01;6.02E-01;3.76E-01;1.35E-01	5957;6402;17858;58715	1.48E+00;1.46E+00;6.25E-01;5.29E-01
	Slu7	0.208642	0.929033	4	GTACAAGCGAGGCGTAAAGG;GATTGTCGAGGAATACGCCA;TGAAGACGAAGACAAATATG;GGAACCGAAGAAATATACTG	-0.27;0.01;0.15;0.95	35183;51546;58604;78005	5.12E-01;5.05E-01;3.76E-01;3.59E-02	1629;21030;28089;44451	1.11E+00;1.01E+00;9.45E-01;6.45E-01
	Agap2	0.208476	1.02481	4	TTATCATTCCAGAACCGTCG;GATGGACTTGTTACGAACAA;TGATAAACTTGAGCATCTTG;CGGTAGCCGAAGGCTCAAGG	-0.0;0.01;0.04;0.79	50743;51432;53025;76622	9.15E-01;5.03E-01;4.04E-01;6.70E-02	3012;26609;28202;28891	1.76E+00;9.40E-01;8.70E-01;5.27E-01
	Olfr592	0.208306	0.933908	4	GATGGGCATCAGCATATGTG;GCCAAGCATACGGGGCACAG;CCAGACCTGGGATCCCAATG;GCTCTGTCTTGATAACTACC	-0.31;-0.16;0.46;0.85	32871;41914;70429;77229	4.95E-01;4.76E-01;4.28E-01;5.33E-02	2405;9205;37720;46762	1.20E+00;9.58E-01;9.25E-01;6.50E-01
	Lclat1	0.208246	0.936743	4	TGAGCCATGTAGCCACAAGA;TCTTAGGCGGTCCACCACAA;CATGAACCACCGGACACGTG;AGGCTGGGCCATGCAAGTTG	-0.18;-0.06;0.18;0.9	40374;47148;60077;77670	6.14E-01;4.56E-01;3.75E-01;4.34E-02	1964;19557;32487;39260	1.23E+00;1.04E+00;7.94E-01;6.86E-01
	Krtap8-1	0.208131	0.929531	4	CAGCCAACACTGTACCCCAG;CATGTACTACACCGGCGCTG;GCCATAGCCAACTGGAGAGT;GTCTTCCCAGGATGCTACTG	-0.4;0.06;0.36;0.8	28487;54323;67423;76819	5.50E-01;4.29E-01;4.21E-01;6.25E-02	2815;12211;25311;51146	1.06E+00;9.95E-01;8.96E-01;7.69E-01
	Camk4	0.208106	0.915675	4	ATACTACAGTGAGCGCGATG;AAAGACACTTCATCCCACCA;ACCTCGAAGAAATCGCCCAG;AAGCGTACCGCAGTACCCCG	-0.37;0.02;0.27;0.91	29930;51808;64065;77776	5.09E-01;4.37E-01;3.90E-01;4.10E-02	1858;15567;27826;49704	1.06E+00;9.55E-01;8.29E-01;8.19E-01
	Pwwp2a	0.208103	0.936697	4	CGAAAGTCCACTTCACACGT;TAATGAATGCGATTAAGCTA;GGACTGGAGAAAATTCGGAG;CGTCGTGTCGTTCCGCCTCG	-0.51;0.01;0.07;1.25	22805;51702;54716;79184	5.07E-01;3.91E-01;3.81E-01;9.82E-03	450;24918;27932;56829	1.65E+00;9.51E-01;5.86E-01;5.57E-01
	Ifit3b	0.208076	0.917147	4	GCTCGAACATTTAAACTCTG;ATTCGCCGACTGGTCACGTG;GATTGATTAAAGATGCTTTG;GGCTCTAGAAGAGAAGCCCA	-0.34;0.01;0.2;0.97	31475;51231;60797;78156	5.00E-01;4.56E-01;3.76E-01;3.25E-02	1478;18837;28403;48159	1.15E+00;9.33E-01;8.74E-01;7.08E-01
	Tcf15	0.20803	0.917407	4	ACGTGCTGTACCCGGACGTG;GTCCAGCTACATCGCCCACC;CCGACGCGTCGCTCTCGCTG;CCGCACGCAGAGCGTGAACA	-0.29;-0.04;0.3;0.87	33975;48334;65303;77406	4.93E-01;4.67E-01;4.01E-01;4.93E-02	2228;14331;31300;45659	9.88E-01;9.66E-01;8.84E-01;8.31E-01
	Mycbp	0.207807	1.06543	4	GTGCTGGACACGCTGACGAA;CTGCTCGCGCTTCGAGTCGG;CGAAGCGCGAGCAGTTCCGG;GGATACTCCAGAGCACTGGT	-0.1;0.2;0.34;0.39	45149;60942;66806;68327	7.35E-01;7.13E-01;4.20E-01;2.66E-01	11308;12828;18694;34485	1.45E+00;1.40E+00;9.60E-01;4.45E-01
	Man1a2	0.207779	0.937765	4	GGCAAAGGAGCTAAAAACCC;CTGACAGGTAATATGCAGCG;AGTGGAGTAGGTCGAAACTG;AATTACAGAACATACGGATG	-0.37;0.07;0.39;0.74	29826;54481;68437;76139	5.53E-01;4.47E-01;4.36E-01;7.79E-02	3495;11197;25153;49807	1.06E+00;1.06E+00;8.15E-01;8.14E-01
	Tmem87a	0.207643	0.995326	4	GTTGACTTACAATCATCAGT;AGGAGTCCTCAGAGTTACAG;AGATGAAATAGAGTCATACT;TTTCAGAATATCCGATACAA	-0.32;-0.28;0.65;0.79	32409;34600;74732;76638	6.91E-01;4.69E-01;4.41E-01;6.66E-02	2996;4902;45034;47225	1.70E+00;9.08E-01;8.72E-01;5.03E-01
	Rarres1	0.207639	0.957821	4	GCGCACGTTACATTAACGGC;AGAGCAATACAACCCCGAGC;CGCGCGGCCCTCCTGCACGG;TTTCTTCTCTCAGACAGTCA	-0.19;-0.15;0.04;1.14	39586;42095;52990;78918	5.97E-01;4.29E-01;4.04E-01;1.57E-02	716;26644;37539;40047	1.46E+00;1.19E+00;6.55E-01;5.27E-01
	Rpl8	0.20761	1.00317	4	TAGGACATCATTCATGACCC;GCGCACGTGAAGCACCGTAA;GACTGTGGCGTAGTTCCCGG;CAACACACGATCGTACCCTC	-0.44;-0.39;-0.11;1.77	26292;28691;44513;79564	5.11E-01;4.97E-01;4.01E-01;1.51E-03	70;35120;50943;53340	2.46E+00;6.96E-01;4.38E-01;4.23E-01
	Pwp1	0.207576	1.49063	4	ACCCAACAGAGACTCGCCAA;ATGCAATGTGTGCAGATCGG;TCTTATTCCAGGATAGGTCA;TCCTCCAGGGACTCCCTAGG	-1.6;0.49;0.76;1.18	561;71289;76370;79036	1.56E+00;1.28E+00;8.40E-01;1.31E-02	598;3264;8345;79073	2.39E+00;2.03E+00;1.53E+00;1.23E-02
	Dtwd2	0.207512	0.939939	4	GATGCTGGATTATGTACAAG;TACATTAATATTATATCCAG;GGCTCCATGTACCATCAATG;GGTGACGCCAAGGCGCCAGA	-0.63;0.02;0.42;1.01	17528;52224;69399;78417	5.15E-01;4.68E-01;3.79E-01;2.67E-02	1217;10235;27409;62107	1.23E+00;1.12E+00;9.71E-01;4.32E-01
	Orc6	0.207372	0.944495	4	AGCCAACTTACTCTATCCAA;TACAGCTGAACTGTACAGCT;CTTGCATGCTGAGAGTAGTG;GGAAGACCAGACTCGTAGCT	-0.4;-0.22;0.04;1.4	28371;38249;53180;79389	4.27E-01;4.20E-01;4.03E-01;5.33E-03	245;26453;41385;51263	1.91E+00;7.65E-01;5.69E-01;5.30E-01
	Trappc6a	0.207125	0.941104	3	GGAGACACCGGCCTTTAGGG;ATGTTCCAGAAGCACATGGA;GCTGTTGTCCTGCAGCACAT	0.05;0.18;0.39	53511;60095;68401	6.64E-01;3.78E-01;1.98E-01	11233;19539;26123	1.45E+00;8.66E-01;5.06E-01
	Nek3	0.207116	0.957851	4	CCTTAAAGGCAACAATATTG;CTGATCCTGAAAATATGCCA;CCCACCTCTAGTCATACCTG;GCGTTTGCATGCACGTACGT	-0.12;-0.11;0.11;0.96	43813;44648;56394;78073	6.98E-01;4.39E-01;3.82E-01;3.44E-02	1561;23240;34986;35821	1.39E+00;1.13E+00;7.21E-01;5.91E-01
	Car3	0.207057	1.02374	4	GAAGATGGAATTGGCGAAGT;CCTGGACAAAATTAAGACGA;GGGTCATAAGATGCTGACCA;AAAGTATAACACCTTTGGAG	-0.35;-0.3;0.73;0.75	30958;33443;75939;76243	7.93E-01;4.50E-01;4.49E-01;7.56E-02	3391;3695;46189;48679	1.93E+00;8.55E-01;8.25E-01;4.84E-01
	Olfr1121	0.206903	0.960833	4	ACAGGCCAGTTTAAGCACAG;ACATGGGCTTCTGTAGTGTA;GGTGGCATGCCGTTTCAGGT;TTTCTTGGACTCATGACCAG	-0.16;-0.06;0.38;0.66	41926;47459;68160;74871	6.51E-01;4.59E-01;4.42E-01;1.07E-01	4763;11474;32175;37709	1.30E+00;1.04E+00;8.03E-01;7.01E-01
	Zcchc24	0.206894	1.02401	4	ATGTTATTGAGGGAACCGTA;GGTCTGAGAAATGCTCGGTG;AGGTGGCACAGGTAGTTCGG;GGGCTGAGTTGCCTTACCTG	-0.06;0.15;0.16;0.58	47353;58418;59290;73356	8.00E-01;6.40E-01;3.75E-01;1.43E-01	6278;20344;21216;32281	1.57E+00;1.26E+00;6.63E-01;6.08E-01
	Actl11	0.20687	0.959606	4	TGGGTTAGAAGAGAATCTCG;TTGTGCAATGCTACACATGT;GCTGGGGTGATCACTGTTAG;ATAGGTGTAAGGTTTAACTG	-0.25;-0.1;0.51;0.67	36458;45196;71839;74971	5.41E-01;5.35E-01;4.42E-01;1.05E-01	4663;7795;34438;43176	1.33E+00;1.06E+00;7.36E-01;7.09E-01
	Snx30	0.206791	0.972984	4	TCAAACTGGGAACCATCGAT;GATCTCATCTTGCCCAACGG;TCAGTCAAGCACGTCACCGG;GGCGATACCAGGATTTCGAC	-0.22;0.16;0.27;0.62	38094;58945;63786;74262	6.54E-01;5.66E-01;3.88E-01;1.21E-01	5372;15848;20689;41540	1.28E+00;1.13E+00;8.17E-01;6.60E-01
	Fscn3	0.206783	1.07399	4	GCAGATGGTACTGTGTGCTA;GTCACATTCGTACTGGAACA;CACATGCAAGTACGGCCTCG;TCGCTATCTTGAGTCCGATG	0.0;0.16;0.22;0.44	50915;59223;61722;70062	9.21E-01;6.62E-01;3.78E-01;2.22E-01	9572;17912;20411;28719	1.77E+00;1.30E+00;7.39E-01;4.85E-01
	Svil	0.206751	1.05095	4	ATTGACCAGTCACACAAAGG;CAGGGAAGCCCACACATGAG;TTCCAAGGGTTTGGAAACCG;ATATGTGGGAGCAACCGCAG	-0.43;0.36;0.38;0.52	26739;67484;67980;71931	9.99E-01;4.39E-01;4.05E-01;1.77E-01	7703;11651;12150;52895	1.92E+00;1.03E+00;7.11E-01;5.45E-01
	Fer1l4	0.206673	1.01148	4	TCCGCGTGTACCGTGCAGAG;ACATTGATGACCACTAGTGG;CCTAAAGTATCAACCCCCTG;CAGTGAAGGGTCAATCATGG	-0.16;0.21;0.22;0.55	41559;61493;61819;72862	7.31E-01;6.42E-01;3.78E-01;1.54E-01	6772;17815;18141;38075	1.44E+00;1.28E+00;7.42E-01;5.84E-01
	Ccdc39	0.206472	0.93029	4	AAAACTTAAACATCACAATG;GCAGTTAGAAAAGCTGACCA;TCGAGAATTGCTTTACAGCA;TTTGTTAAGATGTTTCAGGG	-0.43;-0.28;0.2;1.34	26759;34983;60750;79310	4.39E-01;4.05E-01;3.76E-01;7.06E-03	324;18884;44647;52875	1.79E+00;7.11E-01;7.07E-01;5.09E-01
	Per2	0.206391	1.06778	4	CAACGGGGAGTACATCACAC;AGGTAGGGTGTCATGCGGAA;AGCAGCACCATCGTGCATGT;GTTCTTCACGATATACTCGG	0.01;0.15;0.18;0.49	51516;58536;59906;71214	9.43E-01;6.43E-01;3.75E-01;1.94E-01	8420;19728;21098;28118	1.81E+00;1.26E+00;6.81E-01;5.19E-01
	Rasal3	0.206294	0.956604	4	CTCTTGTATGTAGGACAACG;GTTCCAAACAGGCATGTCCG;GAGACTCTTACCCATCTCGA;CAGGTGCGGTGCTACGAGCG	-0.22;0.12;0.22;0.7	38357;57184;61580;75581	6.09E-01;5.71E-01;3.77E-01;9.07E-02	4053;18055;22451;41277	1.19E+00;1.14E+00;7.59E-01;7.34E-01
	Nuak1	0.206246	0.948021	4	ATTGGCATCACCGTTCCACG;TGATGTCGCTTCACCCCGTG;TCTCGGGCGACGCATAGAGT;TTTCACCCCTTAGATGCTCG	-0.2;0.06;0.15;0.81	39396;54291;58390;76924	5.93E-01;5.49E-01;3.76E-01;6.01E-02	2710;21246;25343;40238	1.19E+00;1.06E+00;9.11E-01;6.39E-01
	Etfbkmt	0.206242	0.976344	4	AAGCCGTAACTGGATTTCCG;TCTGTCTTAGATCTTGGGAG;GGCCAGTAAATAGCCCAGTA;CTTACTGGGGTCTATGTCGT	-0.66;0.07;0.57;0.85	16199;54618;73150;77277	5.98E-01;5.55E-01;3.86E-01;5.22E-02	2357;6484;25016;63435	1.47E+00;1.07E+00;9.66E-01;3.95E-01
	Shank3	0.206096	1.03402	4	CGTGCTCGGATCATACAGGC;GAACCCTCTCCGACGCACCG;AGATGCGACAGTATGACACC;GTACCTACAGATTTGGTCCG	-0.07;0.09;0.36;0.44	46629;55867;67441;69974	7.78E-01;5.80E-01;4.29E-01;2.25E-01	9660;12193;23767;33005	1.53E+00;1.13E+00;9.96E-01;4.83E-01
	Pum1	0.206088	0.982135	4	TATTATGGAGTCACGCCATG;AGAGTTCTGGCAATTACCAG;CAAACATCGATGGCCTACAG;GTTTGATTATTCAGGCACGC	-0.07;-0.0;0.26;0.64	46693;50719;63383;74579	7.80E-01;4.94E-01;3.86E-01;1.14E-01	5055;16251;28915;32941	1.53E+00;9.14E-01;8.01E-01;6.81E-01
	Rbm20	0.206087	0.954173	4	AACCCTGTAGTAGCCGGTGT;ATGGCCGTGACTCCTACGCG;AGAATGACGTCATTAACCTG;CTGAAGCACGTATACTCCGG	-0.28;-0.04;0.49;0.65	34935;48669;71347;74688	5.24E-01;5.08E-01;4.70E-01;1.11E-01	4946;8287;30965;44699	1.28E+00;1.00E+00;8.42E-01;6.88E-01
	Cdk5rap1	0.20598	1.08352	4	GACTGGCATGATATCTGCGT;CCTCATCAGGAAAATCCTTG;TCTGACAGCCATAGGTCTCG;CCTAGAATCCCAATCCTCAG	-0.94;0.04;0.75;0.97	7721;52871;76257;78163	8.27E-01;5.44E-01;5.25E-01;3.24E-02	1471;3377;26763;71913	2.00E+00;1.16E+00;9.97E-01;1.77E-01
	Evi2a	0.205736	0.910805	4	ATTCTGATTACTGGAACCTG;ATGTGGAAGCTAAAGGCACA;CAGCAGAGATCAAAAGTCAG;GGCGCTCACCTTGTGACCCA	-0.31;-0.05;0.3;0.89	33296;47946;64940;77561	4.82E-01;4.63E-01;3.98E-01;4.58E-02	2073;14694;31688;46339	1.02E+00;9.41E-01;8.67E-01;8.19E-01
	Ssbp2	0.20572	0.953003	4	GTGTTGGATCCATTCCACTG;CAAGAATGTAAGAATCCGGG;TTATCATTACAGAACTATGG;GGGGCATGTTTCCTAGCACG	-0.29;0.01;0.46;0.64	34378;51431;70578;74495	5.03E-01;4.99E-01;4.99E-01;1.16E-01	5139;9056;28203;45256	1.22E+00;9.82E-01;9.40E-01;6.75E-01
	Ube2g2	0.205524	1.02297	4	ATCACCTGGAGCATGCAGGA;GAATCCTCCAGAAGGAATCG;TCATCTTCGGAGGGCTCAAG;GCACTGCTCTCATAACCCAT	-0.15;0.21;0.29;0.48	42149;61169;64619;71042	7.21E-01;6.56E-01;3.95E-01;1.98E-01	8592;15015;18465;37485	1.42E+00;1.31E+00;8.52E-01;5.14E-01
	Fnd3c2	0.205367	1.01701	4	CCTAAAAAGCCATACGTAGT;GGAGAAACAGAGGCTAACAT;TTTCAACTTCTTGTAACACA;TTCAGAGTAACAACCATGAG	-0.67;0.02;0.72;0.76	16055;51764;75778;76276	7.78E-01;5.08E-01;3.87E-01;7.48E-02	3358;3856;27870;63579	1.89E+00;9.53E-01;8.29E-01;3.91E-01
	Slco1a5	0.205152	0.96123	4	CTGGTAGGAAACATCATACG;AGAATACTTACCGGCCCATG;AATGAACGGACATACCTATG;AGACAGAAGGTACTCAAACA	-0.15;0.01;0.07;0.89	42418;51446;54392;77637	6.63E-01;5.03E-01;3.94E-01;4.41E-02	1997;25242;28188;37216	1.32E+00;1.03E+00;9.41E-01;5.51E-01
	Fam83e	0.205088	0.998703	4	GCACGAACTTCTCCCGCACA;TGTACCAACTCTTTAATGGG;GGGAACAGCCATCACCGATG;GGCACTAGCCCAGCAGTTAG	-0.54;0.28;0.42;0.66	21309;64266;69243;74947	8.37E-01;4.65E-01;3.76E-01;1.05E-01	4687;10391;15368;58326	1.63E+00;1.11E+00;7.07E-01;5.41E-01
	Zufsp	0.205011	1.40908	4	CCACAAAATGGACATTCGGG;ATGGAGCTAGAAGTAAATAG;GTTCTGATAATACCTATGGA;GTGATAGAGAATTAGCTCAC	-0.9;-0.69;1.17;1.24	8566;15355;78992;79159	1.50E+00;8.38E-01;5.15E-01;1.04E-02	475;642;64279;71067	3.42E+00;1.63E+00;3.92E-01;1.98E-01
	Ddn	0.204945	1.0687	4	TCCCAAGGCAAAACGACTGG;CAGGTGAGCCTCGTAGCTAG;GCTGGATCCTCGAATCTACC;TGTCATTGACGCCACATGCG	0.01;0.15;0.18;0.47	51679;58516;60096;70873	9.50E-01;6.42E-01;3.75E-01;2.02E-01	8761;19538;21118;27955	1.82E+00;1.26E+00;6.87E-01;5.08E-01
	B3gat3	0.204849	0.969938	4	ACGGAGATCAGCTTGCAACT;GGACTCGCGGTGTCTCAGTG;AATGACATAGATAGTAGGCA;TCTACACTGGCTGCTAGTGG	-0.4;0.21;0.38;0.64	28369;61167;67913;74473	7.20E-01;4.38E-01;4.20E-01;1.16E-01	5161;11721;18467;51265	1.42E+00;1.02E+00;7.65E-01;6.74E-01
	Aadacl4	0.204771	0.947537	4	AATGCTGTACATAATTACTC;AGCACTTGAGCACGGATGTG;GAAGAATCTAATGACCTATG;GGTAGAAAATAATGCCTCGA	-0.28;-0.01;-0.01;1.12	34561;50312;50397;78841	5.02E-01;4.89E-01;4.29E-01;1.74E-02	793;29237;29322;45073	1.41E+00;9.89E-01;8.99E-01;4.90E-01
	Adcy6	0.20469	0.953944	4	GAGTACCACAAAAAGGACAG;CCCGAGGTTACATCCAGGCG;CTCACGGGTGCACAGCACCG;CCGGATACATCGCCTCGGAG	-0.74;0.05;0.15;1.36	13638;53432;58322;79338	5.34E-01;4.09E-01;3.76E-01;6.45E-03	296;21312;26201;65996	1.83E+00;1.02E+00;6.37E-01;3.26E-01
	Cnih4	0.204613	0.990806	4	AGATGAGCGCGCAACAGTCG;ATGTTGCTCAAAATTAAACA;AGGATACGAAGTAGACGGAG;TTACCTATATATATTCCACG	-0.11;0.06;0.32;0.55	44438;54111;65937;72812	7.15E-01;5.46E-01;4.08E-01;1.56E-01	6822;13697;25523;35196	1.42E+00;1.05E+00;9.15E-01;5.82E-01
	Chaf1a	0.20452	0.986873	4	AGAGATACGACGAGCCAAGG;ACACCCCCAGAACATCGGGG;AATCAAGCCAGTACCGAGTG;CGGGTGGGCCCCGATCTCAA	-0.75;-0.01;0.61;0.98	12988;50192;73935;78201	6.40E-01;4.87E-01;4.17E-01;3.15E-02	1433;5699;29442;66646	1.58E+00;1.17E+00;8.95E-01;3.09E-01
	Elf3	0.204443	0.943918	4	GACCTCAGACAAGATCCCAA;TCAGTGCCAAAGGTAGTCGG;GAGAGCAAGGTCTTCCCTAG;TGGGTCTTCGACCAGAACTG	-0.37;-0.03;0.52;0.7	29993;48947;72043;75504	5.49E-01;4.73E-01;4.38E-01;9.25E-02	4130;7591;30687;49642	1.35E+00;8.52E-01;8.21E-01;7.52E-01
	Snx6	0.204369	0.992137	4	TTCAGTCGTTCGACAACATG;AGGGGAAGGGTCGATGACAA;GATGCGCTGCAACCCGACAC;TAAGGATGCATCTGCTAAGT	-0.16;-0.04;0.5;0.52	41371;48544;71639;71975	6.37E-01;5.34E-01;4.69E-01;1.76E-01	7659;7995;31090;38263	1.31E+00;1.27E+00;8.38E-01;5.47E-01
	Plpp1	0.204344	1.00433	4	CCCGAGTAGAAAGACAACCT;ATACTTAGCGATGTCAGTCA;AAAGTATATCCATTTCAGAG;GTATGGCGAGTATACGGGAC	-0.46;0.22;0.51;0.55	25059;61932;71690;72755	7.46E-01;5.36E-01;3.92E-01;1.57E-01	6879;7944;17701;54575	1.47E+00;1.32E+00;6.56E-01;5.79E-01
	Csmd3	0.204221	0.988523	4	GCATCTGCAACAAATAACGA;CTACCCCAAAAATTACAGTG;AGAAATCGTGACCATATCGA;TCTGGATCCCAACACACCCG	-0.37;-0.37;0.61;0.95	29678;30140;74032;78004	6.46E-01;4.79E-01;4.34E-01;3.59E-02	1630;5602;49494;49956	1.59E+00;1.11E+00;8.10E-01;4.40E-01
	Tm2d3	0.204067	0.930282	4	GACACTTCGTCATGTAAGGA;GCGCTGCCGAGGGCAAGCCA;AACTACAATACTTACGACAC;GGACAGGAAAAGCAGCACGC	-0.18;-0.09;0.28;0.8	40366;45936;64323;76816	6.14E-01;4.47E-01;3.92E-01;6.26E-02	2818;15311;33698;39268	1.23E+00;8.96E-01;8.39E-01;7.57E-01
	Wtip	0.203752	0.976574	4	CACAGGCGCCCGCTGAGCCA;TGAGAAAGTGTACTGCCAGG;ACAGGCATTTGTATCAAGTG;GGACGTCGGGCGCGGCCTCG	-0.21;0.17;0.27;0.59	38611;59399;63886;73631	6.66E-01;5.77E-01;3.89E-01;1.36E-01	6003;15748;20235;41023	1.31E+00;1.15E+00;8.21E-01;6.23E-01
	Terb1	0.203744	1.01054	4	AAAGTCAAGTGAGCAGAGCT;ATCAGTAATACATGCATCCA;ACGACCATAGCAGATAGCTC;GCTTTAGACATGATTTCACT	-0.03;0.0;0.31;0.53	48991;51014;65571;72353	8.53E-01;4.98E-01;4.04E-01;1.67E-01	7281;14063;28620;30643	1.66E+00;9.25E-01;8.97E-01;5.62E-01
	Kcne2	0.203619	1.16785	4	TGAGCACGGTGAAGTCGAAG;CGGCATGTTCTCGTTCATCG;ACATGCCGATCATCACCATG;TTATTACTTATATGGACAGC	0.06;0.24;0.25;0.26	54138;62649;63127;63631	1.05E+00;7.72E-01;3.90E-01;3.84E-01	16003;16507;16984;25497	1.98E+00;1.52E+00;7.90E-01;3.87E-01
	Slc5a4a	0.203485	0.930686	4	GTGGTACTGGTGCATAAACC;CCCCAGCCTTGATGTAAATG;TCTGAGTGTGTGAAGCATTG;CTGACTTACCGAATACCATG	-0.34;0.12;0.13;0.91	31319;56847;57678;77768	6.01E-01;4.54E-01;3.78E-01;4.12E-02	1866;21956;22787;48315	1.17E+00;1.06E+00;8.68E-01;6.21E-01
	Trappc3l	0.203278	0.94827	4	AATTATCAACATAATCGCCC;AGGATTCTTGTGTAGAATCA;TCTGGTTGCCCAGCTATGCA;GGGGTTACAACATTGGAACA	-0.37;0.18;0.3;0.71	29944;59931;65034;75605	6.82E-01;4.37E-01;3.99E-01;9.02E-02	4029;14600;19704;49690	1.34E+00;8.71E-01;8.19E-01;7.61E-01
	Ccdc51	0.203217	0.950321	4	AAGAGCGTACAAGGGCTGAG;ACTGCACAGAGTCCTTGTCA;CCGGACGCGGTTAACATAGG;GTGTTCTTCCCAATTCCGGG	-0.16;-0.13;0.06;1.04	41378;43749;54241;78552	6.37E-01;4.34E-01;3.95E-01;2.37E-02	1081;25393;35885;38258	1.28E+00;1.27E+00;6.97E-01;5.48E-01
	Als2cr12	0.203185	0.947577	4	TCCACAGGATAGCATTTACG;TCTGCTTCATGTTGGAACAG;TTTCGAATGAGTGTATAGCC;CTTACTTAAACTTCCCCGTG	-0.48;-0.37;0.23;1.43	24285;29788;62337;79415	4.83E-01;3.88E-01;3.80E-01;4.76E-03	219;17297;49845;55349	1.96E+00;7.61E-01;6.32E-01;4.35E-01
	Idh2	0.202952	0.914984	4	ACATCGGCTCATCGACGACA;TCACCGTCCATCTCCACTAC;TCGAGCTGGCACGTTCAAGT;GGCCACCCAGAAGTACAGTG	-0.38;0.03;0.34;0.82	29342;52491;66824;76978	5.19E-01;4.30E-01;4.20E-01;5.89E-02	2656;12810;27143;50292	9.81E-01;9.61E-01;9.19E-01;7.98E-01
	Dnm3	0.202897	0.957438	4	GAGCAGTCACCCTTACCGTG;GACACCTTAGAGCTCTCTGG;GGGGACCCCACACCTCCAGA;TTTCGTTTCAGGCTACGTGG	-0.46;0.21;0.35;0.71	25203;61351;66977;75705	7.27E-01;4.22E-01;3.93E-01;8.79E-02	3929;12657;18283;54432	1.43E+00;9.70E-01;7.71E-01;6.61E-01
	Klk13	0.202701	0.922257	4	CTCCACAGAGAAGTCGTCCG;AGTGGGTACACAGTTCATCT;AGAGTTTCAGGGTACGGACG;AATGGTACCAATGGGACTAG	-0.2;-0.14;0.24;0.91	39455;42728;62783;77740	5.94E-01;4.31E-01;3.82E-01;4.18E-02	1894;16851;36906;40179	1.19E+00;1.05E+00;7.77E-01;6.70E-01
	Lcn3	0.20264	0.934685	4	TTAATCTTGGTGCTGAACAA;CACTACATGCTCTACTGTGA;GTGGGTCTTACCCTCAACTG;AGACGACATCCCAATAAACA	-0.17;-0.1;0.31;0.78	40880;44919;65652;76528	6.26E-01;4.40E-01;4.05E-01;6.91E-02	3106;13982;34715;38754	1.25E+00;9.01E-01;8.59E-01;7.28E-01
	Dbp	0.202588	1.0126	4	ATCAGCGGGATCAGGTTCAA;ACGTATTCCACGTCCCCGAA;CTGGCCTACAGGTCTCCTGA;GCCACTAACGGCCCCACTCG	-0.38;0.3;0.35;0.54	29495;65150;67102;72411	8.77E-01;4.32E-01;4.24E-01;1.65E-01	7223;12532;14484;50139	1.71E+00;9.77E-01;8.04E-01;5.64E-01
	Paqr6	0.202512	1.04838	4	GCATGGAGTAGGCGGCATAG;TAGCAGATGTGACGAGCACG;CCTTCTTCCCAAAACACCTG;GTAGGAAGACCAGCAGCGGT	-0.16;0.27;0.28;0.42	41680;63754;64419;69356	8.16E-01;6.45E-01;3.93E-01;2.40E-01	10278;15215;15880;37954	1.60E+00;1.29E+00;8.44E-01;4.67E-01
	Ttc17	0.202501	0.908529	4	GGTCGTAACAGAGCACCGAA;GGAAGGAGTATCGACGACAT;ATTAATATGACTAGGTCATG;TCTCGTGGATGATGTTGCGC	-0.31;-0.04;0.16;1.0	33111;48308;59263;78336	4.79E-01;4.66E-01;3.75E-01;2.85E-02	1298;20371;31326;46523	1.21E+00;9.34E-01;8.31E-01;6.63E-01
	Crebzf	0.202115	0.96004	4	TGACCGCGAGCAACCTCACG;GAGCGGCGGCCTGTTGAGGG;GGAGGCGGTGGCGCCAACGA;TCTTCTTGAGCCGATTAAGA	-0.35;0.16;0.38;0.61	30860;59166;68213;74076	6.60E-01;4.48E-01;4.43E-01;1.26E-01	5558;11421;20468;48774	1.30E+00;1.04E+00;8.52E-01;6.48E-01
	Lpcat4	0.202072	0.921756	4	GGGTCAAAGAAAGTTGAGTG;TTTAGGAGCCTTCATCGCAG;CAGGACTGTATGCCACAACG;AGCTAGAAGTACTCGGATTG	-0.23;-0.22;0.27;0.98	37862;38424;64077;78194	5.61E-01;4.27E-01;3.90E-01;3.17E-02	1440;15557;41208;41772	1.16E+00;1.12E+00;8.29E-01;5.73E-01
	Rhox12	0.202064	0.933642	4	ACCCCAATTTCTACAAACTG;AGTGCCATGGGAGCCATCAA;TCAGACAAATTAAAGTGCCA;AAGGATGATGTGATCTACGT	-0.51;-0.06;0.54;0.84	22666;47541;72545;77135	5.70E-01;4.59E-01;3.80E-01;5.54E-02	2499;7089;32093;56968	1.40E+00;9.43E-01;8.06E-01;5.82E-01
	Fiz1	0.201897	1.003	4	TTGAAGCCCTTACCGCATCG;CTACAGTGAAAGGGGACCCG;GCTGCTCCTGAGCCCTACCG;CTGCTCAGTATGTTGCAACG	-0.03;-0.01;0.31;0.55	49049;49957;65419;72634	8.55E-01;4.84E-01;4.02E-01;1.60E-01	7000;14215;29677;30585	1.66E+00;8.89E-01;8.86E-01;5.74E-01
	Shisa9	0.201669	1.08082	4	TTGCCCGTGTTAAGCCAGAG;CCCACGCCAGACTCCTGTCG;GGAGAGAGACCTTAACATCG;CCACATTCATACCCCAACCT	0.02;0.16;0.21;0.42	52164;58997;61216;69249	9.68E-01;6.55E-01;3.76E-01;2.43E-01	10385;18418;20637;27470	1.85E+00;1.29E+00;7.22E-01;4.65E-01
	Lzic	0.201663	1.14642	4	GCAGCAGTTACAAGACCTGG;ACTTCGGACAAGGCTAGCCG;TCGCTGAAGAAGATTATGTC;ACTTTGGTAGATGAACTCAG	-0.99;0.32;0.67;0.8	6508;66105;75035;76835	9.23E-01;7.14E-01;5.97E-01;6.21E-02	2799;4599;13527;73126	1.79E+00;1.75E+00;8.99E-01;1.48E-01
	Slc15a4	0.20145	0.951787	4	TATCACCACCACCCATCACA;GACACGACGCTGACCCGTTG;CCAATTGAAAAATCTCCGAG;GCGTGGAGGGCCGTTCACAG	-0.67;0.04;0.06;1.37	15957;53135;54191;79359	5.29E-01;3.95E-01;3.87E-01;5.99E-03	275;25443;26499;63677	1.86E+00;1.01E+00;5.47E-01;3.88E-01
	Chrna1	0.201254	0.932803	4	AAGGTGCTCCTGGACTACAC;GAGTAACTTCATGGAGAGCG;TGACTTGTACAATCTCACGG;AACATATACTTCCCGATCAG	-0.23;-0.15;0.41;0.77	37811;42445;69086;76440	5.60E-01;4.61E-01;4.30E-01;7.11E-02	3194;10547;37189;41823	1.12E+00;1.10E+00;8.48E-01;6.63E-01
	Nktr	0.201106	1.03335	4	AAGCATTGAATGATAAGCAG;TGTCCGAGTTATTGACTGTG;GCAGTTCAGAAGAACCGAGG;AAATGTGCTAGTGCAACCAG	-0.59;0.33;0.46;0.6	19269;66381;70448;73841	9.38E-01;4.96E-01;3.75E-01;1.31E-01	5793;9186;13253;60366	1.81E+00;1.20E+00;6.35E-01;4.81E-01
	Sytl2	0.201104	0.935039	4	CAACAACTAAAGAATATGAG;ATATGTCCCAGGAAAGTACG;AGGGACTCCCTGAATGCGAG;GCAGATGAACTGACTCAGTG	-0.38;-0.32;0.41;1.1	29500;32536;68905;78770	4.57E-01;4.55E-01;4.32E-01;1.89E-02	864;10729;47098;50134	1.38E+00;1.09E+00;8.04E-01;4.71E-01
	Atp8b3	0.201066	1.0188	4	CACAGGTACAGTGACTTGCG;CTTCTGGAGGAAGTCTAACG;GTCATCCACAAGATCACGAG;GTGGCTCGTAGTACATATTG	-0.33;0.25;0.43;0.45	31875;63082;69768;70271	7.89E-01;4.77E-01;4.62E-01;2.17E-01	9364;9866;16552;47761	1.55E+00;1.15E+00;8.88E-01;4.91E-01
	Tank	0.201048	1.01762	4	ATAGAGTCATTGTCCATAGG;GCATCACTATAAAGGATGGT;CTTCTCGTGGATTCTAGTCG;TCTGGAAAAGAATCCGCCAA	-0.71;0.18;0.61;0.73	14437;60136;73951;75911	6.88E-01;6.41E-01;4.00E-01;8.32E-02	3723;5683;19498;65197	1.58E+00;1.35E+00;7.91E-01;3.47E-01
	Lmf2	0.200842	0.947566	4	AGAAGGCAGTAAGTCGTAGG;GCAGGCACTGAGTCTCATAG;CAGAATGGGAGGTCTTCATG;CTGGGGCTGGATACTGCCCA	-0.24;0.1;0.31;0.63	37241;55937;65475;74456	5.81E-01;5.49E-01;4.03E-01;1.17E-01	5178;14159;23697;42393	1.13E+00;1.10E+00;8.92E-01;6.72E-01
	Cfi	0.200805	0.95813	4	AAGGTCGACGCAGGCCACGT;TGCCTGCATGTACATTGCCG;TGTTATTACACAGGTTGCCG;CTTGTGGATTACCTTCACAA	-0.3;0.07;0.46;0.58	33465;54704;70416;73386	5.57E-01;4.95E-01;4.85E-01;1.42E-01	6248;9218;24930;46169	1.20E+00;1.07E+00;9.47E-01;6.10E-01
	Acsl6	0.200765	0.951612	4	CTGCTACACGTATTCCATGG;AGAGAATCATCATGCCCCCG;GCCCGGCGATCTGTGATTGG;TGGCAGTAGACAACAGACTG	-0.38;0.09;0.47;0.62	29427;55644;70770;74216	5.75E-01;5.05E-01;4.31E-01;1.22E-01	5418;8864;23990;50207	1.23E+00;1.12E+00;8.01E-01;6.57E-01
	Guf1	0.200691	0.935801	4	ACAGCTGTGCTTCAAAAGCA;CCTTAATACACTCCTCACTA;CTTCATAACTAAAATCAACG;TTTCAGTATCATTGCACATG	-0.47;-0.29;0.48;1.08	24785;34402;70952;78711	5.11E-01;4.42E-01;3.91E-01;2.02E-02	923;8682;45232;54849	1.35E+00;1.25E+00;6.48E-01;4.99E-01
	Hapln2	0.200627	1.07121	4	ACGCTAATCCTCATTACCAA;ACTTACGGCCAACTCTACCA;GGTCATTCACTCTCGTCGTG;CTCCCAGCTACAAAGTACGC	-0.48;0.4;0.41;0.47	24330;68693;69057;70730	1.07E+00;4.60E-01;3.88E-01;2.06E-01	8904;10577;10940;55304	2.05E+00;1.10E+00;6.33E-01;5.04E-01
	Otud6b	0.20057	1.0795	4	CCTCCTCCATGACGACCAGG;ACAAGACTGTGCGCTGACTG;TACATACAGTGACCATCAGA;GCTGGTGAGAAGGCATCGGA	0.05;0.14;0.18;0.44	53325;57887;60058;69907	1.02E+00;6.26E-01;3.75E-01;2.26E-01	9727;19576;21747;26309	1.92E+00;1.23E+00;6.86E-01;4.81E-01
	Tmem38a	0.200544	1.00577	4	TCGAAGCAACTGTTCCACGT;CAGGATGGCTCCATACAGAC;TCATGATGAACCACCCGTGG;ACTCCCAAAACAGTGCAACA	-0.07;0.08;0.28;0.51	47016;55173;64354;71705	7.90E-01;5.66E-01;3.92E-01;1.82E-01	7929;15280;24461;32618	1.55E+00;1.10E+00;8.41E-01;5.36E-01
	Ncoa2	0.200521	0.998249	4	CTTTGCAAAGTGATGTCAAG;GGGAGGATTCATATTAACTG;AGTCAGATGTGTCGTCCACG;AGTGCATAGTTACTACCCTG	-0.05;0.07;0.11;0.67	48223;54530;56612;75042	8.28E-01;5.53E-01;3.81E-01;1.03E-01	4592;23024;25104;31412	1.62E+00;1.07E+00;7.14E-01;5.96E-01
	Pramef20	0.200269	0.978907	4	TCCTATCACTCCACTGAACG;CACTGCCAGTTCATCCAAGG;AGTGCTGGATTTACGGTCTG;CTGTTGAAGCAAGCCTACGA	-0.13;0.06;0.32;0.55	43423;54309;65861;72747	6.88E-01;5.49E-01;4.07E-01;1.57E-01	6887;13773;25324;36212	1.37E+00;1.06E+00;9.11E-01;5.79E-01
	Ltbp4	0.20014	0.988071	4	AGGCCGCTGCGACAACACCG;GGCTGATTGAAGGTCACTCG;TCATGATTGTCACCCGTGCG;ATTGACGAGTGTCGTGAACG	-0.16;0.15;0.27;0.53	41798;58717;64058;72293	6.48E-01;6.47E-01;3.90E-01;1.68E-01	7341;15577;20917;37836	1.29E+00;1.27E+00;8.28E-01;5.59E-01
	Ly96	0.200102	0.921503	4	GTAGGAAATAATTGCATCGG;CATAGAGTTGCCGAAGCGTA;CTGAACCCTGCATAAGACTG;GTTCAGAACTAATTGAAATA	-0.37;0.01;0.06;1.09	29979;51458;54339;78765	5.04E-01;4.38E-01;3.94E-01;1.90E-02	869;25295;28176;49655	1.37E+00;9.41E-01;8.21E-01;5.50E-01
	Ip6k3	0.200023	0.922421	4	CGTCATACTGCAGCACACTC;GGGAGCACAGACGAGTCAGG;GAAGTGCGCACAGAGCACCT;CCTGGTTGCCAACCCACTGA	-0.51;-0.05;0.51;0.85	22667;47834;71785;77289	5.39E-01;4.62E-01;3.80E-01;5.19E-02	2345;7848;31800;56967	1.32E+00;9.68E-01;8.15E-01;5.82E-01
	Acot11	0.200007	1.00062	4	CTTAAAGGCGTTATTCACGA;AGGATACCGGAACCCCACGG;TCATCAGGGCAATACCTTCG;GCAGGTCATCCCATTGACCG	-0.42;0.3;0.35;0.57	27486;65079;66940;73183	8.73E-01;4.22E-01;4.12E-01;1.47E-01	6451;12694;14555;52148	1.70E+00;9.68E-01;7.35E-01;5.99E-01
	Spata24	0.199822	0.976782	4	TCATCACCAAGTGCAATGGT;CAGGACTCTGCTCTTGACAC;GGACGTGATTGAATCTCAGG;CACCAGCTGAGGAATGTGGT	-0.19;0.13;0.32;0.53	39915;57690;66028;72360	6.21E-01;6.04E-01;4.09E-01;1.66E-01	7274;13604;21945;39719	1.22E+00;1.21E+00;9.19E-01;5.62E-01
	Kndc1	0.199788	0.987989	4	GGGGTACAAAGGCACCCTCG;TGAAGCCTCTAGTTGCCCCG;GAAGTTCTGTGACCTATACT;GGTTGAACTGAAATCCACCA	-0.09;0.11;0.18;0.61	45528;56484;59860;73976	7.46E-01;5.93E-01;3.75E-01;1.28E-01	5658;19774;23150;34107	1.47E+00;1.16E+00;6.80E-01;6.42E-01
	Sipa1	0.199738	0.916936	4	AGAGATGTACAACAACCAGG;TCATAGTGAGCAAACCACCG;GGTCATCGTGCGGACCACGC;CGATCTGTACCACGGGCGCG	-0.58;-0.19;0.37;1.21	19618;39621;67652;79087	4.33E-01;4.26E-01;3.75E-01;1.20E-02	547;11982;40013;60016	1.57E+00;1.01E+00;5.98E-01;4.91E-01
	9030624J02Rik	0.19973	0.98653	4	GGACTACATTAATTGTGCCG;CCATCGAGGACGCTGCTCAG;GGATTATGTGAACCGCATAG;GAGCTCAGCATACCCGACAC	-0.32;0.15;0.48;0.49	32360;58617;70974;71370	6.45E-01;5.12E-01;4.68E-01;1.90E-01	8264;8660;21017;47274	1.27E+00;1.25E+00;9.06E-01;5.25E-01
	Zfp944	0.199616	1.03451	5	TTGACTCTAAACAAATACTC;AATGTCTTGACTGTGCTCAG;TCTTGTAAATGTAATGATCG;TTCTCTGATGAATTATAAGA;TCATCAGAGAATTCATACAG	-1.23;-0.56;-0.04;0.61;2.22	2911;20585;48743;73945;79597	8.03E-01;5.76E-01;5.65E-01;4.62E-01;9.82E-04	37;5689;30891;59049;76723	2.63E+00;1.39E+00;6.60E-01;4.08E-01;8.08E-02
	1110065P20Rik	0.199284	0.966694	4	GCCGATACAGATGGCTGGGG;CGGCGCCCAGAACCGGCTGG;GCCGCCCCAGCCATCTGTAT;TAGAACGGTTCAGCCAAGTC	-0.24;0.18;0.26;0.6	36845;60173;63357;73810	6.89E-01;5.42E-01;3.85E-01;1.32E-01	5824;16277;19461;42789	1.36E+00;1.08E+00;7.99E-01;6.33E-01
	Blk	0.199046	0.917279	4	CGTGAAAGATATCACCACCC;AAGGTCCCTGTCATTCACAG;ACTTGAATAGTGCTGCACCA;TTATTACAAAAATAACATGA	-0.56;0.05;0.15;1.16	20286;53559;58428;78979	5.36E-01;3.76E-01;3.75E-01;1.43E-02	655;21208;26075;59349	1.49E+00;1.02E+00;6.40E-01;5.11E-01
	Olfr850	0.199041	1.03732	4	ATCAGCAGGACACAAAAACA;GGTGTGTGCAGAATGACAGT;AGTCAAAGCATTACATACAA;ACTTCCCCAGATCCTCAAGT	-0.85;-0.09;0.74;0.99	9804;45959;76086;78311	8.09E-01;4.79E-01;4.47E-01;2.91E-02	1323;3548;33675;69830	1.96E+00;1.20E+00;7.58E-01;2.28E-01
	Scgb1b12	0.198921	0.963583	4	GGAGGAGCAGGGCAGCCCCG;TGTCGATAGCACCTTGACAG;GTACTCAACATACGCTTCTG;AACCTCCCCCTGAAGTCAGG	-0.73;0.06;0.53;0.94	13739;54129;72309;77940	5.60E-01;5.46E-01;4.08E-01;3.73E-02	1694;7325;25505;65897	1.38E+00;1.10E+00;1.05E+00;3.29E-01
	Commd2	0.198841	1.07244	4	TAAGCTTTGAGCTCTCGGTG;AGTGTCCACTTGCGGCAGGA;GCCGTGGAGTTCCTCCGACG;CTATGGTAACTGGGAAGACG	-0.32;0.36;0.37;0.38	32789;67442;67713;68079	9.96E-01;4.75E-01;4.34E-01;2.72E-01	11555;11921;12192;46845	1.92E+00;1.01E+00;9.22E-01;4.41E-01
	Gabrb2	0.198797	0.92484	4	TAACCAGCGACATATTACTA;ATGATTCGATTGCATCCCGA;GATGAGTTTATAATCTACGA;CTTGACTTTGGACAACCGAG	-0.61;-0.07;0.49;0.99	18158;46780;71350;78262	5.24E-01;4.53E-01;3.77E-01;3.02E-02	1372;8284;32854;61476	1.28E+00;1.18E+00;7.83E-01;4.50E-01
	Adam1a	0.19872	1.00922	5	CCCTCCTTAAGCGTACATGT;GACCTTCCCGAGTATTGTGA;CACTAGGGGGATAAACACAG;CTTTAATCAAGACCCCCCTG;TTTCCTCCATGACCACAGAG	-0.43;-0.1;0.17;0.58;0.76	26860;45388;59740;73466;76340	5.88E-01;5.79E-01;5.52E-01;4.88E-01;9.17E-02	3294;6168;19894;34245;52774	1.33E+00;1.06E+00;1.01E+00;8.93E-01;7.58E-01
	Cox7b2	0.198692	0.965614	4	GAAGAAACTCATGACAAATA;CCAAGCATTCTGAAAATTGT;GCAATATGATGCTAATTAGT;GTTTAGTGCATATCTGGCCA	-0.24;-0.05;0.53;0.56	37010;47920;72228;72966	5.57E-01;5.45E-01;4.63E-01;1.52E-01	6668;7406;31715;42624	1.37E+00;1.09E+00;8.18E-01;5.89E-01
	Aym1	0.198662	0.933242	4	TGCTCTCACAGAACTTTCTG;AGGAGCACGCGCACTGCACG;GAAAGTTCTGTGAGAGCACG;TTCCATTATCTCTTAGAGAG	-0.45;0.12;0.41;0.71	25484;57309;68957;75730	6.12E-01;4.58E-01;3.95E-01;8.73E-02	3904;10677;22325;54149	1.20E+00;1.09E+00;7.73E-01;6.70E-01
	Zfp42	0.198386	0.917787	4	TGAGGGATAAAACCGCCCTG;TACCTAGAGTGCATCATACG;AGTGGCCAGAAAGGGCCGGG;GCGAGCTCATTACTTGCAGG	-0.3;0.08;0.23;0.79	33718;55008;62099;76655	5.63E-01;4.89E-01;3.79E-01;6.62E-02	2979;17535;24626;45916	1.09E+00;9.57E-01;8.75E-01;7.52E-01
	Krt86	0.198034	1.00087	5	TGCTACCGAGGACTCTCAGG;GCTCTCATTGACAGAGACTG;CCTGCGCAAGTCAGACCTGG;GTTCGCGGCCTTCATCGACA;TTTCTGTCCTAGGTACGAGG	-0.45;0.01;0.14;0.18;1.11	25520;51295;58195;60019;78823	7.28E-01;5.48E-01;4.66E-01;4.01E-01;2.22E-02	811;19615;21439;28338;54113	1.31E+00;1.29E+00;9.82E-01;8.39E-01;5.85E-01
	Inip	0.19784	0.933157	4	CATGCATTACCTTGTCCTGA;CGGAAGTCCTTGGTAAGAGA;GCCAATACCTAGCTCCAGGG;GCTGCTGCTCAGCATGGTCC	-0.51;-0.06;0.56;0.8	22778;47125;73014;76820	5.91E-01;4.56E-01;3.80E-01;6.25E-02	2814;6620;32510;56856	1.46E+00;8.97E-01;7.93E-01;5.85E-01
	Bcl7a	0.197792	0.985583	4	GGACGAGAAGTGTGGCTCGG;AGATGATATCAAGAGGGTCA;CCGTGCATGTCCATCATCCC;TCGTAGGGATGTATCGCCAA	-0.48;0.16;0.56;0.56	24099;58870;72933;72936	6.52E-01;5.87E-01;3.87E-01;1.53E-01	6698;6701;20764;55535	1.45E+00;1.28E+00;6.26E-01;5.88E-01
	Col4a4	0.197713	0.996209	4	AGGCTCAGGATCCTTACCCG;TGGGATTCCAGGCCCCAATG;CTTTGCATGGTAATACCTGG;GGACTACCGGGACTCCACAG	-0.68;0.11;0.63;0.72	15812;56779;74428;75797	6.71E-01;6.00E-01;3.88E-01;8.58E-02	3837;5206;22856;63822	1.65E+00;1.17E+00;7.79E-01;3.84E-01
	Serpina3f	0.197562	0.922308	4	TCTCAGTCAGCCAGGGAACC;AGAGTCCTTCCAATTCCTCA;AGATTTCCAGCAGCCTCTCG;GGATGAGAATAGGTCTGTGA	-0.33;-0.08;0.48;0.73	31896;46140;70910;75942	5.10E-01;4.62E-01;4.48E-01;8.24E-02	3692;8724;33494;47740	1.24E+00;8.89E-01;7.94E-01;7.63E-01
	Ctsa	0.197521	1.0035	4	CATGACCAGTACAGCCAAGG;GTGGTGCTTTGGCTTAACGG;CTCCGGCTACCTCAGAGCAT;GGACTCGATATACAGCACGT	-0.75;0.07;0.66;0.81	12951;54844;74816;76935	6.98E-01;5.59E-01;4.18E-01;5.99E-02	2699;4818;24790;66683	1.71E+00;1.08E+00;9.13E-01;3.08E-01
	Pramel5	0.197493	0.971273	4	AGAATGTCGGCAGTACTTGA;TAACAATATGGGCTTCCTGT;AACCTCAGTTCGGGACAGTG;CCTGCAATGAGTGATAGCAA	-0.33;0.13;0.47;0.52	32243;57653;70624;72044	6.21E-01;5.01E-01;4.67E-01;1.74E-01	7590;9011;21981;47391	1.22E+00;1.22E+00;9.02E-01;5.49E-01
	Pak3	0.197425	0.948994	4	ACTTAGTGGGTGATGAACTG;ACAGCACTAGACATTGCGAC;ATACATAGCAGCACATCAGT;TCAGATCTATACTCGCTCCG	-0.5;-0.39;0.39;1.29	23313;28568;68527;79239	4.98E-01;4.49E-01;3.83E-01;8.62E-03	395;11107;51066;56321	1.71E+00;1.06E+00;6.02E-01;4.22E-01
	NO_CURRENT_259	0.197419	0.922336	4	TCGTTGTGTCGACATCCGCA;TCGTGTCTAGCTATCGAGTG;TCGTTACATACCCCGCGGAA;TCTACACGCGCGTTCAACCG	-0.43;0.15;0.16;0.91	26837;58616;58892;77755	6.45E-01;4.06E-01;3.75E-01;4.15E-02	1878;20742;21018;52797	1.27E+00;1.06E+00;7.14E-01;6.52E-01
	Colgalt1	0.197002	0.902086	4	TGACAAGATGGGCTTCGATG;GGGAATCGGACCAGTGTTTG;GATGATGTCATCAAAAGACC;ATCCGAAAACGAGACCGCAG	-0.35;-0.15;0.39;0.89	31173;42502;68379;77614	4.52E-01;4.46E-01;4.30E-01;4.46E-02	2020;11255;37132;48461	1.05E+00;1.03E+00;8.63E-01;6.65E-01
	Accsl	0.196943	1.09015	4	GCCTTGACCTGATAACAGCG;ATCCCCACACCGTGCTACAA;CCTTGCTTGGACTCTAGATG;CTGCACCCTATCTAAGCGTG	-0.9;0.19;0.74;0.77	8550;60398;76014;76433	8.01E-01;6.96E-01;5.15E-01;7.13E-02	3201;3620;19236;71084	1.95E+00;1.37E+00;8.47E-01;1.97E-01
	Gng8	0.196697	1.06671	4	TTCGCAGAAAGCCAAAAGCT;TGCTGAGGCCCGCAAGACCG;AGTGAACATCGATCGCATGA;TTTCTGCGAAACGCACGCTA	-0.7;-0.46;0.72;1.23	14774;24954;75826;79140	7.82E-01;5.56E-01;3.97E-01;1.08E-02	494;3808;54680;64860	1.91E+00;1.61E+00;3.92E-01;3.56E-01
	Iigp1	0.196693	0.918185	4	ATTCTACTTCGTGAGAACCA;TGTGTCTCTTGTAGATAGGG;ACACCCCAATATACCCAATG;AGGTGTTCACACAGTTAAGG	-0.46;0.13;0.33;0.79	25230;57377;66368;76641	6.14E-01;4.14E-01;3.94E-01;6.65E-02	2993;13266;22257;54404	1.20E+00;9.37E-01;8.73E-01;6.62E-01
	Mafg	0.19667	1.00676	4	GAGTTGAACCAGCACCTGCG;AGGCGCACACTGAAGAACCG;GTTCAACTCTCGCACCGACA;TCTGTGTCACCCGCTTGACG	-0.73;-0.25;0.7;1.06	13918;36517;75509;78640	7.53E-01;4.32E-01;4.06E-01;2.18E-02	994;4125;43117;65716	1.84E+00;1.32E+00;5.36E-01;3.34E-01
	Zfp773	0.1966	1.00615	4	GGACTGACATCACTCAGCTG;GGCCTGCAACCAACCACACG;AATTGCAAATGTTACGACTG;GACTACTTGATGACTCTCAG	-0.0;0.02;0.06;0.72	50593;51790;53861;75772	9.09E-01;5.08E-01;3.97E-01;8.63E-02	3862;25774;27844;29041	1.75E+00;9.54E-01;7.77E-01;5.41E-01
	Dppa1	0.196521	1.0888	4	TTAGTGGAGATCTTCAGGGA;ACACAGAGATTCCAATATAG;TTACAGTGTGATTATTCCAA;TAGTCAGGGCACTTGCAAGG	0.02;0.16;0.27;0.34	51902;58796;64085;66608	9.58E-01;6.50E-01;3.90E-01;3.10E-01	13026;15549;20838;27732	1.83E+00;1.28E+00;8.29E-01;4.17E-01
	Gnrh1	0.19639	0.928313	4	AAAGAGAAACACTGAACACT;TCCTATGGGTTGCGCCCTGG;ACAGTACATTCGAAGTGCTG;CTTGGTTGAGTCTTTCCAAG	-0.61;0.13;0.38;0.89	18379;57483;68025;77575	6.16E-01;4.40E-01;3.77E-01;4.55E-02	2059;11609;22151;61255	1.21E+00;1.03E+00;1.02E+00;4.56E-01
	H2al1j	0.196305	1.15014	7	TCATGGCCAAGAAAATGCAA;AGTACTCGAGCACACTATCG;AGGTGGCCTACACCACTGGC;AAACGATCTACAAGGCTAAG;CATCCTCGAACTGGCTGGTG;CTGGTAAAAAACGATCTACA;AAAAGAACCCACTCCCAGAG	-1.2;-0.66;0.05;0.12;0.41;0.66;2.0	3288;16238;53793;57064;69014;74831;79584	9.22E-01;7.39E-01;6.78E-01;6.49E-01;5.54E-01;5.37E-01;1.87E-03	50;4803;10620;22570;25841;63396;76346	2.36E+00;1.46E+00;1.33E+00;1.25E+00;1.08E+00;4.40E-01;1.28E-01
	Zfp263	0.196301	0.895298	4	GAACCGTCGAAATCGCAGAT;AAGATAGCTATGAGAACTCG;GCACAGAACACACATAGGAG;GTTCCCAGGTCACAAACCAA	-0.31;-0.06;0.29;0.86	33155;47490;64880;77344	4.80E-01;4.59E-01;3.97E-01;5.07E-02	2290;14754;32144;46479	9.77E-01;9.35E-01;8.64E-01;8.04E-01
	Fam58b	0.196076	0.988548	4	TTACTTGGCCGGCAAAGTGG;TCGCACAGGTACTTTAACCC;ATGGTAAATGGTGCAAGCGG;AGTAACCCGGTTTATCATGG	-0.64;0.2;0.54;0.69	17108;60780;72575;75293	7.08E-01;5.71E-01;3.81E-01;9.74E-02	4341;7059;18854;62526	1.41E+00;1.39E+00;7.34E-01;4.20E-01
	Chd8	0.195996	0.943997	4	TGAGAAATACAATACCATGA;TTGTCCTCCAGTATTACTGG;ACCGTTACAAAATACCGTAG;GCCCTATGAGGACAGTACGT	-0.32;0.04;0.47;0.59	32350;53189;70822;73675	5.30E-01;5.07E-01;4.68E-01;1.35E-01	5958;8812;26446;47284	1.24E+00;1.01E+00;9.06E-01;6.25E-01
	Bmi1	0.195773	1.0026	4	GCATCACAGTCATTGCTGCT;ACTGTCTTTATAGCTGCCAA;TTCTCTCTCTTAGATTGGAT;TCCTACCTTATGTTCAGGAG	-0.59;-0.31;0.72;0.96	19041;33157;75873;78106	7.87E-01;4.51E-01;3.75E-01;3.36E-02	1528;3761;46477;60593	1.92E+00;1.14E+00;4.80E-01;4.75E-01
	Nfil3	0.195704	0.976533	4	GAAGATTTGCTCCTGAACGA;TCTCCAAAACCAGGTCATTG;TTCCTGAGTGTGCTCCACCG;GATTTCTTGGGCATACGCCG	-0.17;0.0;0.45;0.5	41290;50867;70298;71430	6.35E-01;4.96E-01;4.91E-01;1.89E-01	8204;9336;28805;38344	1.27E+00;1.19E+00;9.18E-01;5.27E-01
	Fbxo24	0.195665	0.996064	4	CGTAGTCAAGAATGAACACG;CTCGACACAACACCACGTAG;AACTGCACTGTATAGGAGCG;GAGATCACGATACACCCCGG	-0.06;0.1;0.15;0.59	47507;56216;58595;73562	8.05E-01;5.87E-01;3.76E-01;1.38E-01	6072;21039;23418;32127	1.58E+00;1.14E+00;6.44E-01;6.19E-01
	Smarce1	0.195448	0.956895	4	CAGCCTGCTGAGGATCCAGA;GAATACGAAGCAGAAAAGGT;ATGAGGTACAGCAGAAAGGT;AGAGTGTGGTACCTGATGTG	-0.62;0.2;0.43;0.78	17995;60729;69517;76551	7.06E-01;4.71E-01;3.78E-01;6.86E-02	3083;10117;18906;61639	1.39E+00;1.13E+00;8.61E-01;4.45E-01
	Fnip1	0.195408	0.946059	4	CTGGATTCAGATAATCACAC;AATCTGTCAGATGAAAGTTG;GATACTACTGCCAGTCCGTG;GCACTCCTGATCAGGCGGAG	-0.57;0.1;0.52;0.74	19995;55984;72000;76036	5.82E-01;5.48E-01;3.75E-01;8.03E-02	3598;7635;23650;59639	1.35E+00;1.13E+00;8.03E-01;5.02E-01
	Vps41	0.195334	0.905656	4	GTTGGCATATGTAAACCACC;TGTACTTTCCTACGTAAAGG;CCTGCAAGAATACTCCGAGG;CGAAGACTTATGTCATCTCG	-0.31;-0.25;0.3;1.03	33082;36710;65302;78510	4.79E-01;4.31E-01;4.01E-01;2.47E-02	1124;14332;42924;46552	1.27E+00;9.33E-01;8.84E-01;5.39E-01
	En1	0.195157	0.892667	4	TGTGCTCCAGATGCGAACTG;AGCCGCGTGGAGCGTGACCG;GTGGTAGTGGAGGCAACGCG;GTTATCGATGAAAAAGTTGG	-0.48;-0.14;0.34;1.06	24092;42674;66745;78642	4.30E-01;4.19E-01;3.87E-01;2.18E-02	992;12889;36960;55542	1.32E+00;9.57E-01;6.69E-01;6.26E-01
	Hsd3b4	0.195151	0.623851	1	GATCATCCTGAATGCCCATG	0.2	60700	0.118	18934	0.624
	Gm10681	0.195151	0.623851	1	GATCATCCTGAATGCCCATG	0.2	60700	0.118	18934	0.624
	Drg2	0.195136	0.976614	4	ATCCGCCTCATCCAAAGGAG;CCCAGGGATGCACGTCAGGG;GCTCGAACGCAGAAGAACAA;GTCTTCTCGGAAGAGTACCT	-0.08;0.03;0.27;0.56	46373;52437;63832;73028	7.70E-01;5.18E-01;3.89E-01;1.50E-01	6606;15802;27197;33261	1.52E+00;9.79E-01;8.19E-01;5.92E-01
	Hist2h2aa1	0.195104	1.3523	10	CCGGGCTACAGTTCCCGGTG;TCCGGTCGTGGCAAGCAAGG;CCGCGTTGCCCGCCAGCTCC;CGCCATGTATACCGGCGCGC;CGGCGCGCCGGTATACATGG;GGCCGGGCTACAGTTCCCGG;TCGTGGCAAGCAAGGAGGCA;AGCCGGTGCACACGCCCCAC;GGCAACTACGCGGAGCGTGT;CGGGAACTGTAGCCCGGCCC	-0.58;-0.17;-0.14;0.03;0.09;0.12;0.28;0.34;0.74;1.24	19548;41256;42864;52504;55517;56920;64485;66831;76068;79145	1.45E+00;1.21E+00;1.08E+00;9.76E-01;7.32E-01;7.24E-01;7.11E-01;5.43E-01;5.28E-01;2.67E-02	489;3566;12805;15149;22714;24118;27130;36769;38378;60086	2.14E+00;1.74E+00;1.57E+00;1.42E+00;1.24E+00;1.22E+00;1.20E+00;1.11E+00;1.05E+00;8.35E-01
	Hist2h2aa2	0.195104	1.3523	10	CCGGGCTACAGTTCCCGGTG;TCCGGTCGTGGCAAGCAAGG;CCGCGTTGCCCGCCAGCTCC;CGCCATGTATACCGGCGCGC;CGGCGCGCCGGTATACATGG;GGCCGGGCTACAGTTCCCGG;TCGTGGCAAGCAAGGAGGCA;AGCCGGTGCACACGCCCCAC;GGCAACTACGCGGAGCGTGT;CGGGAACTGTAGCCCGGCCC	-0.58;-0.17;-0.14;0.03;0.09;0.12;0.28;0.34;0.74;1.24	19548;41256;42864;52504;55517;56920;64485;66831;76068;79145	1.45E+00;1.21E+00;1.08E+00;9.76E-01;7.32E-01;7.24E-01;7.11E-01;5.43E-01;5.28E-01;2.67E-02	489;3566;12805;15149;22714;24118;27130;36769;38378;60086	2.14E+00;1.74E+00;1.57E+00;1.42E+00;1.24E+00;1.22E+00;1.20E+00;1.11E+00;1.05E+00;8.35E-01
	Shkbp1	0.194742	0.983133	4	CCTGCATTACCCAAGTTGGG;ACAGCATGATCTTAGTGACC;GCTCTACCGAGACCCAGCAG;GAGTTGGATCGATCTTCCTG	-0.36;-0.3;0.67;0.76	30661;33505;75102;76374	7.19E-01;4.48E-01;4.46E-01;7.26E-02	3260;4532;46129;48973	1.76E+00;8.45E-01;8.40E-01;4.85E-01
	Olfr792	0.194608	0.939728	4	CACCACAATAATGAGCAGCA;GGAAAAATTCAGTTGCACCC;ACAATGCTCACAAGGAACCG;GAATGCAAAGAGCTCTAGGA	-0.47;0.22;0.26;0.77	24556;61960;63331;76471	7.47E-01;3.89E-01;3.85E-01;7.04E-02	3163;16303;17674;55078	1.47E+00;8.52E-01;7.98E-01;6.40E-01
	Sema3f	0.194565	0.984448	4	GCGACGGCCACGGTTCACAT;CAGATCAGTACAACTCCCGG;GCTGCCCAAGGACGACCAGG;CACCCCCAGAACGATGACGG	-0.06;-0.01;0.32;0.53	47333;50246;66000;72204	8.00E-01;4.88E-01;4.09E-01;1.70E-01	7430;13634;29389;32301	1.57E+00;9.18E-01;8.97E-01;5.56E-01
	Olfr506	0.194516	0.998683	4	ATTGGGATTAACAGATGAGC;ACCATTACATACCTAGGATG;GAACAAGAGAGTTCAACTAG;AGTAAAGAACGAAAGGGTGA	-0.12;0.1;0.34;0.45	44078;56308;66682;70328	7.05E-01;5.89E-01;4.18E-01;2.16E-01	9306;12952;23326;35556	1.40E+00;1.15E+00;9.54E-01;4.92E-01
	Olfr508	0.194458	0.965646	4	ATTCACACATCCACCTAGGT;ACACAATAAATAAAATGGCA;CTGCGTGGCATAGAGCAGAG;GTCACACCCATCATGCTGAA	-0.12;0.08;0.2;0.62	44152;55170;60900;74126	7.07E-01;5.66E-01;3.76E-01;1.24E-01	5508;18734;24464;35482	1.40E+00;1.10E+00;7.12E-01;6.51E-01
	F8a	0.194301	0.965016	4	ATCACCAAGCGCTTGCAGTG;CATGCGTGTAAATAGCGCCA;AAAGTCGGGCCGCCTCTGTG;GGGCTGTCCCGCCGCCTACG	-0.52;0.27;0.32;0.7	22075;63999;66113;75573	8.26E-01;4.10E-01;3.78E-01;9.09E-02	4061;13521;15635;57559	1.61E+00;9.24E-01;7.59E-01;5.64E-01
	Pnpt1	0.194141	0.979493	4	TTGCCATGCTATCAAAGTTG;ACCAACGGCATGAATTGGGA;AATGTGTCGTTAACCCAACA;GAAGAGATCTGACTTCACTT	-0.07;0.04;0.26;0.56	46801;52825;63358;72874	7.83E-01;5.24E-01;3.85E-01;1.54E-01	6761;16276;26809;32833	1.54E+00;9.95E-01;8.00E-01;5.85E-01
	Fgf23	0.194054	1.00046	4	TGCCGTGGAGATCCATACAA;CATCTACATGACCATCCCTA;AGAATTGCAAGTTCCGCCAG;ATGATTACATCAGAGGACGC	-0.27;0.2;0.42;0.43	35193;60819;69333;69687	7.09E-01;5.13E-01;4.67E-01;2.32E-01	9947;10301;18815;44441	1.39E+00;1.12E+00;1.01E+00;4.75E-01
	Tspan13	0.193993	0.923612	4	CAATGACCACACCCACCACT;ACTGGACAATAAATACAAGT;AGCTCCAATTAGCCCCACCA;GGCTACTCACGGTATACAGC	-0.26;-0.16;0.46;0.74	35722;41719;70568;76011	5.22E-01;4.99E-01;4.28E-01;8.09E-02	3623;9066;37915;43912	1.21E+00;1.03E+00;8.01E-01;6.46E-01
	Trim63	0.19382	0.980171	4	CATCTACTGTCTCACGTGTG;GGAGATGTTTACCAAGCCTG;CCCTACTGGACCAACCGCGG;AGTGATCATGGACCGGCACG	-0.06;0.06;0.11;0.67	47271;54154;56567;75001	7.98E-01;5.47E-01;3.82E-01;1.04E-01	4633;23068;25480;32363	1.56E+00;1.05E+00;7.11E-01;5.95E-01
	Ppp1r11	0.193589	1.08795	4	TGAGACCGTCACTGAGACAA;ACTGTGGACAATGAGCATAT;AGTGACGGTCTCACTTATCC;AGAGCCTAACTATGAAACTT	-0.86;-0.47;0.68;1.42	9677;24487;75259;79407	7.32E-01;5.65E-01;4.82E-01;4.94E-03	227;4375;55147;69957	1.95E+00;1.79E+00;3.89E-01;2.25E-01
	Crispld2	0.19354	0.968323	4	TGTCGGAACATGAACGTCTG;GAGTGTCCATCCAGCTACGG;AAGATGAAGGACTCATGCAA;TGTGCAGTCATGGTACGACG	-0.2;0.17;0.24;0.56	39297;59690;62800;72919	6.75E-01;5.91E-01;3.82E-01;1.53E-01	6715;16834;19944;40337	1.33E+00;1.18E+00;7.78E-01;5.87E-01
	Il34	0.193247	0.910449	4	TTCCCAAAGCCACGTCAAGT;GGATTGCTGTGCCTTATGAG;GTGATGGATGTACTTCTCGA;CATTGCTGGAGAACGTACAG	-0.29;-0.14;0.42;0.78	34391;42739;69422;76571	4.99E-01;4.69E-01;4.31E-01;6.81E-02	3063;10212;36895;45243	1.13E+00;9.82E-01;8.64E-01;6.71E-01
	Nr1d1	0.193205	0.990988	4	CACAACAGCTGACACCACCC;TTCTGGGGCCGAATATACGT;GTTGCGATTGATGCGAACGA;GAGTAGGTGAGGTCTCTAGA	-0.59;0.32;0.34;0.7	19315;66009;66584;75514	9.18E-01;4.17E-01;3.75E-01;9.23E-02	4120;13050;13625;60319	1.78E+00;9.48E-01;7.53E-01;4.83E-01
	Col4a3	0.19316	0.934295	4	ATACTCACAAAAAATCCCGG;GTAGCCCAGGCAATCCCTCG;ATACAAACCGGTTCGCCCTG;TATTCATACATAGGTCGAAG	-0.12;-0.08;0.22;0.76	44220;46001;61795;76271	7.09E-01;4.47E-01;3.78E-01;7.49E-02	3363;17839;33631;35413	1.41E+00;8.29E-01;7.59E-01;7.42E-01
	B020004J07Rik	0.193155	1.12829	6	TTGAAGGCCTTTATGAAGAG;TTTGCAGGTAGTCACTAACC;TCTTGATCAAAATATCTGCT;GTAAAAAACAAGGTCTCCAA;AAGGTGCAAGCTTCAAGTGT;TTTGGAAATACACACACGAG	-0.39;-0.37;0.1;0.51;0.57;0.73	29031;29982;56025;71795;73202;76007	1.02E+00;7.41E-01;6.45E-01;4.97E-01;4.93E-01;1.21E-01	3627;6432;7839;23609;49654;50603	1.85E+00;1.24E+00;1.18E+00;1.16E+00;6.72E-01;6.65E-01
	Dbil5	0.193027	0.902479	4	GAGTGATCAGGAGAAACTGC;CAGCTGCTTGAGTGAAGCAC;GATGTTACAGTCGCCCTGGG;AGTTTCTCCTGATCACTCAC	-0.54;0.03;0.4;0.89	21240;52548;68600;77574	5.20E-01;4.51E-01;3.76E-01;4.55E-02	2060;11034;27086;58393	1.07E+00;1.02E+00;9.84E-01;5.39E-01
	Dnajc4	0.192594	0.940866	4	GGGCCCAGTATTGAGCGTTG;TGTGTCTGTTGCGTATACTT;AGTCGGATGGAAAGGCTATG;ATATCGAGTGCTCAGTCGTG	-0.33;-0.1;0.56;0.64	32048;44926;73012;74611	5.91E-01;4.64E-01;4.40E-01;1.13E-01	5023;6622;34708;47586	1.46E+00;8.94E-01;7.29E-01;6.83E-01
	Serpinb6d	0.192589	0.964893	4	CACTGCAAGGCAGATAAGGC;AGTGAATTCAAACACTAGAC;AGGGATGAAGCAATGCTCGG;ATTTAATAAAGAGGACACCA	-0.38;0.23;0.36;0.57	29216;62084;67405;73090	7.52E-01;4.29E-01;4.29E-01;1.49E-01	6544;12229;17550;50418	1.48E+00;9.94E-01;7.94E-01;5.95E-01
	Pramef6	0.192558	1.10646	6	TGTGCAGTGAGTAATAGCAA;GAATGCAGTGAGTAATAGCA;CCTGATGGAGATTCCTGACC;GCCAGGGGCTAGTGATGCAA;GCTTCCTTCTCTACGTCCCA;AGGTCCCAAGGCCTATCCCA	-0.39;-0.07;-0.05;0.42;0.51;0.73	28915;46773;48122;69258;71784;75994	8.37E-01;8.24E-01;6.41E-01;5.63E-01;4.53E-01;1.22E-01	3640;7850;10376;31512;32861;50718	1.54E+00;1.38E+00;1.18E+00;1.02E+00;8.72E-01;6.63E-01
	Prr36	0.192544	0.927887	4	AGGATCTTGCAAAGACGGCG;TCCACAGACCACTATTCACG;AGAGATTACAGCTCTCGGTG;GGAGCCCGTGGGGTTACACG	-0.34;0.05;0.43;0.63	31356;53676;69725;74342	5.38E-01;4.76E-01;4.55E-01;1.19E-01	5292;9909;25958;48278	1.15E+00;1.03E+00;8.69E-01;6.65E-01
	Nim1k	0.192538	0.888868	4	CATAAACACCAACGTAGTGT;TCTCCACGACTTCATAAAGA;TTCACTCCCTAACCAAAGGT;TGGCACGATGCCATTTCGAG	-0.37;0.0;0.18;0.96	29829;50839;60119;78089	4.95E-01;4.36E-01;3.75E-01;3.40E-02	1545;19515;28825;49805	1.14E+00;9.17E-01;8.15E-01;6.87E-01
	Ttc24	0.192439	0.908006	4	GGTCAGCATCAGCAAGCTTG;CCAAATTGGCAGATGCCATG;TCTGATGGCTGTCGACACAG;ATTCTACAATGATCTAGGCA	-0.45;0.14;0.24;0.84	25620;57950;62638;77211	6.28E-01;3.96E-01;3.81E-01;5.37E-02	2423;16996;21684;54014	1.23E+00;9.55E-01;7.72E-01;6.74E-01
	NO_CURRENT_201	0.192404	0.939614	4	GGCGGGTTAGGCCCCGTTTT;GGCGCTACTGTAATGACGGT;GGCGTCGTAACAAGAACTTG;GGCCGTGTAGTGGCCCACGG	-0.65;0.17;0.39;0.87	16675;59371;68374;77407	6.66E-01;4.46E-01;3.83E-01;4.93E-02	2227;11260;20263;62959	1.31E+00;1.05E+00;9.88E-01;4.08E-01
	Sec14l1	0.192334	1.05694	4	AGCACGTACGTATCGCAGTA;AGCCTTGCTGCGCATCATCG;AGATCGCACTTTGCACATCG;CCTTCTGGACTACTACGCTG	0.04;0.11;0.14;0.47	53278;56737;58072;70823	1.01E+00;5.99E-01;3.77E-01;2.04E-01	8811;21562;22897;26356	1.92E+00;1.17E+00;6.31E-01;5.07E-01
	Mtmr12	0.192254	0.917579	4	AATGGATAACGAGCTTCTCG;ATGTACTTACTGGTATACCA;TCTGTGAACTCAAATGCTGG;AAACCTTATTACCCAACAGG	-0.18;-0.02;0.16;0.8	40551;49554;59274;76834	6.18E-01;4.80E-01;3.75E-01;6.22E-02	2800;20360;30080;39083	1.24E+00;8.98E-01;8.72E-01;6.63E-01
	Vmn2r68	0.19214	0.958456	4	CTTCACATAACCATGCCTTG;GATGGAGTGGGCGATAGATG;AGCTTCTTACAATTAAATGG;ATTAGGGAAACCATCGCTAG	-0.22;0.05;0.43;0.51	38055;53318;69763;71800	5.65E-01;5.32E-01;4.77E-01;1.80E-01	7834;9871;26317;41581	1.15E+00;1.13E+00;1.01E+00;5.40E-01
	Micu2	0.192048	0.912799	4	GCACGATATACTCACTTGTG;GACTCGCGGCCCTCTCGCAG;CGTTCGGGAGCCCTCGCGCG;TGTGTATTCAAAGGATATCG	-0.25;-0.03;0.36;0.69	36338;49384;67330;75315	5.33E-01;4.78E-01;4.28E-01;9.68E-02	4319;12304;30250;43296	1.06E+00;9.90E-01;8.67E-01;7.36E-01
	Pms1	0.191816	1.12217	4	AGAACAAATCAAAGCACGAT;TGTTTGACTAACAACCATGT;AATTGATGTTCCATCAGCTG;GGGGTCAATATGTAATGTTG	0.07;0.18;0.2;0.31	54756;60091;60917;65615	1.08E+00;6.87E-01;3.76E-01;3.36E-01	14019;18715;19543;24878	2.02E+00;1.35E+00;7.12E-01;4.05E-01
	Cops3	0.191786	1.10202	4	GATGGGACAAGTTCTTCGCA;ATGGAGGAATGATCTATACG;GCAGAGATCGGCATGTACTG;TCATGGTAAGCATTGCTGAG	-1.04;-0.19;0.78;1.22	5593;39944;76595;79105	8.67E-01;6.46E-01;4.26E-01;1.16E-02	529;3039;39688;74041	2.09E+00;1.58E+00;6.05E-01;1.26E-01
	Amhr2	0.191629	0.955711	4	AGGCAGCGGATACCCTTGGG;ACTCAGTACACGAGCGACTG;ACAACACGAGAAACATTCCC;AGATAGGTCATGCGCCATCG	-0.23;0.06;0.42;0.52	37683;54192;69237;71957	5.58E-01;5.47E-01;4.64E-01;1.76E-01	7677;10397;25442;41951	1.11E+00;1.11E+00;1.05E+00;5.46E-01
	Fgf22	0.191611	0.89865	4	GAGATCCGTTCTGTCCGTGT;GTGATCAAAGCTGTGTACTC;CACTCACCGACCCATAGAGG;TCCCCTGCACCCGACCACCA	-0.43;0.05;0.13;1.01	26807;53715;57543;78413	5.39E-01;4.06E-01;3.78E-01;2.68E-02	1221;22091;25919;52827	1.23E+00;1.03E+00;7.13E-01;6.18E-01
	Lrrc24	0.191496	1.05882	4	AGTCTACTAGAAGTATCTGG;TCCCACCGGGAATCCCTCCG;GAGGTCCAGTAGGGCTAAGG;GCTTGAGGCTTACCATCGCG	-1.08;-0.15;0.6;1.4	4941;42465;73777;79384	6.89E-01;6.31E-01;4.30E-01;5.44E-03	250;5857;37169;74693	1.91E+00;1.56E+00;6.64E-01;1.11E-01
	Arfip1	0.19131	0.985665	4	AGGCCGTGGCTCAAGAACTG;CATTGCTAGTGTGAACACCT;TGGCTTTGACAGTACCAAAG;CAAAGAACACACACAAAAGG	-0.06;0.08;0.11;0.63	47498;55345;56617;74372	8.05E-01;5.69E-01;3.81E-01;1.19E-01	5262;23017;24289;32136	1.58E+00;1.10E+00;6.67E-01;5.96E-01
	Tmem222	0.191296	0.887657	4	GACTCACCGAAACAAAATAG;CACTCGCATACACCTGTCCG;TCGGTGCTTATACTCTTCGG;GGAAGTAGAAACGCCGACGG	-0.36;-0.0;0.17;0.96	30280;50771;59553;78079	4.94E-01;4.41E-01;3.75E-01;3.42E-02	1555;20081;28863;49354	1.13E+00;9.16E-01;8.31E-01;6.71E-01
	Sssca1	0.191048	1.01601	4	ACAGCGGAAAATCTACTGTG;TCTAGCACTGAATGCACAGG;AGATGTCGACGATTTCACCT;CAGGTAGTCCCCCATCAGAC	-0.09;0.17;0.24;0.44	45806;59560;62766;69899	7.54E-01;6.71E-01;3.82E-01;2.26E-01	9735;16868;20074;33828	1.49E+00;1.32E+00;7.77E-01;4.81E-01
	Capza1	0.191042	1.00466	4	CATTACACCACCTTCAGCCC;TAACAATGACAATCTCCTCA;TTTACGCTAAAACTATAGAT;TGATGAATTTAGCGGCTATG	-0.15;0.12;0.4;0.4	42281;57017;68606;68667	6.59E-01;6.05E-01;4.51E-01;2.57E-01	10967;11028;22617;37353	1.32E+00;1.18E+00;1.07E+00;4.52E-01
	Hoxd3	0.191013	0.991105	4	GCTGGCCGGAGTAAGCCACG;AATGGTAGCTGTATGAGACC;TTGGCCATCTCCACGCGGCG;GCTGCATACTACGAGAACCC	-0.05;0.06;0.23;0.52	48094;54041;62288;72093	8.24E-01;5.45E-01;3.80E-01;1.73E-01	7542;17346;25593;31540	1.61E+00;1.05E+00;7.59E-01;5.51E-01
	Btbd18	0.191007	0.954081	4	TTCAACCTCACTGCCCCAAG;CTTCACCATAGGGTGGTCTG;AAGTTAGTAAAGGCTCCGCA;ACTGTAAGTAAAGAAGCACA	-0.52;0.23;0.39;0.67	22109;62278;68297;75027	7.59E-01;4.45E-01;3.78E-01;1.04E-01	4607;11337;17356;57525	1.49E+00;1.05E+00;7.13E-01;5.65E-01
	NO_CURRENT_223	0.190759	1.01255	4	GTTCGGTTGCAGCTTACACG;GTTCCGGATATATACGGTTA;GTTCCAGCAACATATTGTTG;GTTCGCGGGGGCTTCTATCA	-0.11;0.19;0.21;0.47	44811;60651;61395;70631	7.25E-01;7.04E-01;3.77E-01;2.08E-01	9003;18239;18983;34825	1.44E+00;1.38E+00;7.28E-01;5.01E-01
	Nwd1	0.190753	0.910837	4	CCAGCTCTGTATACGCCTGG;ATGAGTTGGATCTCATGTCG;CCAGTAAGAGTGGCTCGAAG;GCTACTTGGCCACAAGACAG	-0.18;-0.07;0.14;0.88	40292;46618;57857;77553	6.13E-01;4.52E-01;3.77E-01;4.60E-02	2081;21777;33016;39342	1.22E+00;1.02E+00;7.78E-01;6.26E-01
	Tvp23b	0.19053	0.923437	4	GATGGAAGAAGGATGCCACG;CAATATGATTCCACCAACGC;TAGCCAAAAGATTCTTGACT;TGCTACTGAGCAGCTCGCAA	-0.14;-0.1;0.24;0.76	43043;45053;62854;76291	6.78E-01;4.41E-01;3.83E-01;7.45E-02	3343;16780;34581;36591	1.35E+00;8.31E-01;7.80E-01;7.32E-01
[truncated: 18,584 more rows]
